1 *Type: Letter/Methods*

2

## 3 **selscan 2.0: scanning for sweeps in unphased data**

4

5 *Zachary A. Szpiech<sup>1,2,\*</sup>*

6

7 <sup>1</sup> *Department of Biology, Pennsylvania State University, University Park, PA 16802, USA*

8 <sup>2</sup> *Institute for Computational and Data Sciences, Pennsylvania State University, University Park,*

9 *PA 16802, USA*

10 *\* Correspondence: [szpiech@psu.edu](mailto:szpiech@psu.edu)*

11

### 12 **Abstract**

13 Haplotype-based scans to identify recent and ongoing positive selection have become  
14 commonplace in evolutionary genomics studies of numerous species across the tree of life.  
15 However, the most widely adopted approaches require phased haplotypes to compute the key  
16 statistics. Here we release a major update to the selscan software that re-defines popular  
17 haplotype-based statistics for use with unphased “multi-locus genotype” data. We provide  
18 unphased implementations of iHS, nSL, XP-EHH, and XP-nSL and evaluate their performance  
19 across a range of important parameters in a generic demographic history. Source code and  
20 executables are available at <https://www.github.com/szpiech/selscan>.

### 21 **1 Introduction**

22 Haplotype-based summary statistics—such as iHS (Voight, et al. 2006), nSL (Ferrer-  
23 Admetlla, et al. 2014), XP-EHH (Sabeti, et al. 2007), and XP-nSL (Szpiech, et al. 2021)—have  
24 become commonplace in evolutionary genomics studies to identify recent and ongoing positive  
25 selection in populations (e.g., Colonna, et al. 2014; Zoledziwska, et al. 2015; Nedelec, et al.  
26 2016; Crawford, et al. 2017; Meier, et al. 2018; Lu, et al. 2019; Zhang, et al. 2020; Salmon, et al.  
27 2021). When an adaptive allele sweeps through a population, it leaves a characteristic pattern  
28 of long high-frequency haplotypes and low genetic diversity in the vicinity of the allele. These  
29 statistics aim to capture these signals by summarizing the decay of haplotype homozygosity as  
30 a function of distance from a putatively selected region, either within a single population (iHS

31 and nSL) or between two populations (XP-EHH and XP-nSL). However, each of these statistics  
32 presumes that haplotype phase is known.

33         Recent work has shown that converting haplotype data into multi-locus genotype data is  
34 an effective approach for using haplotype-based selection statistics such as G12, LASSI, and  
35 saltiLASSI (Harris, et al. 2018; Harris and DeGiorgio 2020; DeGiorgio and Szpiech 2021) in  
36 unphased data. Recognizing this, we have reformulated the iHS, nSL, XP-EHH, and XP-nSL  
37 statistics to use multi-locus genotypes and provided an easy-to-use implementation in selscan  
38 2.0 (Szpiech and Hernandez 2014). We also evaluate the performance of these unphased  
39 statistics under various generic demographic models.

## 40 **2 New Approaches**

41         When the --unphased flag is set in selscan v2.0+, biallelic genotype data is collapsed  
42 into multi-locus genotype data by representing the genotype as either 0, 1, or 2—the number of  
43 derived alleles observed. In this case, selscan v2.0+ will then compute iHS, nSL, XP-EHH, and  
44 XP-nSL as described below. We follow the notation conventions of Szpiech and Hernandez  
45 (2014).

### 46 **2.1 Extended Haplotype Homozygosity**

47         In a sample of  $n$  diploid individuals, let  $\mathcal{C}$  denote the set of all possible genotypes at  
48 locus  $x_0$ . For multi-locus genotypes,  $\mathcal{C} := \{0,1,2\}$ , representing the total counts of a derived  
49 allele. Let  $\mathcal{C}(x_i)$  be the set of all unique haplotypes extending from site  $x_0$  to site  $x_i$  either  
50 upstream or downstream of  $x_0$ . If  $x_1$  is a site immediately adjacent to  $x_0$ , then  $\mathcal{C}(x_1) :=$   
51  $\{00,01,02,10,11,12,20,21,22\}$ , representing all possible two-site multi-locus genotypes. We can  
52 then compute the extended haplotype homozygosity (EHH) of a set of multi-locus genotypes as

$$53 \quad EHH(x_i) = \sum_{h \in \mathcal{C}(x_i)} \frac{\binom{n_h}{2}}{\binom{n}{2}},$$

54 where  $n_h$  is the number of observed haplotypes of type  $h$ .

55 If we wish to compute the EHH of a subset of observed haplotypes that all contain the  
 56 same ‘core’ multi-locus genotype, let  $\mathcal{H}_c(x_i)$  be the partition of  $\mathcal{C}(x_i)$  containing genotype  $c \in \mathcal{C}$   
 57 at  $x_0$ . For example, choosing a homozygous derived genotype ( $c = 2$ ) as the core,  $\mathcal{H}_2 :=$   
 58  $\{20,21,22\}$ . Thus, we can compute the EHH of all individuals carrying a given genotype at site  $x_0$   
 59 extending out to site  $x_i$  as

$$60 \quad EHH_c(x_i) = \sum_{h \in \mathcal{H}_c(x_i)} \frac{\binom{n_h}{2}}{\binom{n_c}{2}},$$

61 where  $n_h$  is the number of observed haplotypes of type  $h$  and  $n_c$  is the number of observed  
 62 multi-locus genotypes with core genotype of  $c$ . Finally, we can compute the complement EHH of  
 63 a sample of multi-locus genotypes as

$$64 \quad cEHH_c(x_i) = \sum_{h \in \mathcal{C}(x_i) \setminus \mathcal{H}_c(x_i)} \frac{\binom{n_h}{2}}{\binom{n_{c'}}{2}},$$

65 where  $n_{c'}$  is the number of observed multi-locus genotypes with a core genotype of not  $c$ .

## 66 2.2 iHS and nSL

67 Unphased iHS and nSL are calculated using the equations above. First, we compute the  
 68 integrated haplotype homozygosity (iHH) for the homozygous ancestral ( $c = 0$ ) and derived ( $c =$   
 69 2) core genotypes as

$$70 \quad iHH_c = \sum_{i=1}^{|\mathcal{D}|} \frac{1}{2} (EHH_c(x_{i-1}) + EHH_c(x_i)) d(x_{i-1}, x_i) + \sum_{i=1}^{|\mathcal{U}|} \frac{1}{2} (EHH_c(x_{i-1}) + EHH_c(x_i)) d(x_{i-1}, x_i),$$

71 where  $\mathcal{D}$  is the set of downstream sites from the core locus and  $\mathcal{U}$  is the set of upstream sites.  
 72  $d(x_{i-1}, x_i)$  is a measure of genomic distance between to markers and is the genetic distance in  
 73 centimorgans or physical distance in basepairs for iHS (Voight, et al. 2006) or the number of  
 74 sites observed for nSL (Ferrer-Admetlla, et al. 2014). We similarly compute the complement  
 75 integrated haplotype homozygosity (ciHH) for both homozygous core genotypes as

$$\begin{aligned}
 76 \quad c_{iHH_c} &= \sum_{i=1}^{|\mathcal{D}|} \frac{1}{2} (cEHH_c(x_{i-1}) + cEHH_c(x_i)) d(x_{i-1}, x_i) \\
 77 \quad &+ \sum_{i=1}^{|\mathcal{U}|} \frac{1}{2} (cEHH_c(x_{i-1}) + cEHH_c(x_i)) d(x_{i-1}, x_i).
 \end{aligned}$$

78 The (unstandardized) unphased iHS is then calculated as

$$79 \quad iHS = \begin{cases} iHS_2, & \text{if } iHS_2 > iHS_0 \\ -iHS_0, & \text{otherwise} \end{cases}$$

80 where  $iHS_2 = \log_{10} \left( \frac{iHH_2}{c_{iHH_2}} \right)$  and  $iHS_0 = \log_{10} \left( \frac{iHH_0}{c_{iHH_0}} \right)$ . Unstandardized iHS scores are then  
 81 normalized in frequency bins, as previously described (Voight, et al. 2006; Ferrer-Admetlla, et  
 82 al. 2014). Unstandardized unphased nSL is computed similarly with the appropriate distance  
 83 measure. Large positive scores indicate long high-frequency haplotypes with a homozygous  
 84 derived core genotype, and large negative scores indicate long high-frequency haplotypes with  
 85 a homozygous ancestral core genotype. Clusters of extreme scores in both directions indicate  
 86 evidence for a sweep.

### 87 **2.3 XP-EHH and XP-nSL**

88 Unphased XP-EHH and XP-nSL are calculated by comparing the iHH between  
 89 populations  $A$  and  $B$ , using the entire sample in each population. iHH in a population  $P$  is  
 90 computed as

$$91 \quad iHH_P = \sum_{i=1}^{|\mathcal{D}|} \frac{1}{2} (EHH(x_{i-1}) + EHH(x_i)) d(x_{i-1}, x_i) + \sum_{i=1}^{|\mathcal{U}|} \frac{1}{2} (EHH(x_{i-1}) + EHH(x_i)) d(x_{i-1}, x_i),$$

92 where the distance measure is given as centimorgans or basepairs for XP-EHH (Sabeti, et al.  
 93 2007) and number of sites observed for XP-nSL (Szpiech, et al. 2021). The XP statistics  
 94 between population  $A$  and  $B$  are then computed as  $XP = \log_{10} \left( \frac{iHH_A}{iHH_B} \right)$  and are normalized  
 95 genome wide in a single bin. Large positive scores indicate long high-frequency haplotypes in

96 population *A*, and large negative scores indicate long high-frequency haplotypes in population  
97 *B*. Clusters of extreme scores in one direction indicate evidence for a sweep in that population.

## 98 **3 Methods**

### 99 **3.1 Simulations**

100 We evaluate the performance of the unphased versions of iHS, nSL, XP-EHH, and XP-  
101 nSL under a generic two-population divergence model using the coalescent simulation program  
102 discoal (Kern and Schrider 2016). We explore five versions of this generic model and name  
103 them Demo 1 through Demo 5 (Table 1). Let  $N_0$  and  $N_1$  be the effective population sizes of  
104 Population 0 and Population 1 after the split from their ancestral population (of size  $N_A$ ). For  
105 Demo 1, we keep a constant population size post-split and let  $N_0 = N_1 = 10,000$ . For Demo 2,  
106 we keep a constant population size post-split and let  $N_0 = 2N_1 = 10,000$ . For Demo 3, we keep  
107 a constant population size post-split and let  $2N_0 = N_1 = 10,000$ . For Demo 4, we initially set  
108  $N_0 = N_1 = 10,000$  and let  $N_0$  grow stepwise exponentially every 50 generations starting at 2,000  
109 generations ago until  $N_0 = 5N_1 = 50,000$ . For Demo 5, we initially set  $N_0 = N_1 = 10,000$  and let  
110  $N_1$  grow stepwise exponentially every 50 generations starting at 2,000 generations ago until  
111  $5N_0 = N_1 = 50,000$ .

112 For each demographic history we vary the population divergence time  $t_d \in$   
113  $\{2000, 4000, 8000\}$  generations ago. For non-neutral simulations, we simulate a sweep in  
114 Population 0 in the middle of the simulated region across a range of selection coefficients  $s \in$   
115  $\{0.005, 0.01, 0.02\}$ . We vary the frequency at which the adaptive allele starts sweeping as  $e \in$   
116  $\{0, 0.01, 0.02, 0.05, 0.10\}$ , where  $e = 0$  indicates a hard sweep and  $e > 0$  indicates a soft sweep,  
117 and we also vary the frequency of the selected allele at time of sampling  $f \in \{0.7, 0.8, 0.9, 1.0\}$   
118 as well as  $g \in \{50, 100\}$  representing fixation of the sweeping allele  $g$  generations ago. For all  
119 simulations we set the genome length to be  $L = 500,000$  basepairs, the ancestral effective  
120 population size to be  $N_A = 10,000$ , the per site per generation mutation rate at  $\mu = 2.35 \times 10^{-8}$ ,

121 and the per site per generation recombination rate at  $r = 1.2 \times 10^{-8}$ . For neutral simulations, we  
122 simulate 1,000 replicates for each parameter set, and for non-neutral simulations we simulate  
123 100 replicates for each parameter set. As iHS and nSL are single population statistics, we only  
124 analyze Demo 1, Demo 3, and Demo 4 with these statistics, as Demo 2 and Demo 5 have a  
125 constant size history identical to Demo 1 for Population 0, where the sweeps are simulated.

126 For all simulations, we compute the relevant statistics (--ihs, --nsl, --xpehh, or --xpnsl)  
127 with selscan v2.0, using the --unphased and --trunc-ok flags. For iHS and XP-EHH, we also use  
128 the --pmap flag in order to use physical distance instead of a recombination map.

### 129 **3.2 Power and False Positive Rate**

130 To compute power for iHS and nSL, we follow the approach of Voight et al. (2006). For  
131 these statistics, each non-neutral replicate is individually normalized jointly with all matching  
132 neutral replicates in 1% allele frequency bins. Because extreme values of the statistic are likely  
133 to be clustered along the genome (Voight, et al. 2006), we then compute the proportion of  
134 extreme scores ( $|iHS| > 2$  or  $|nSL| > 2$ ) within 100kbp non-overlapping windows. We then bin  
135 these windows into 10 quantile bins based on the number of scores observed in each window  
136 and call the top 1% of these windows as putatively under selection. We calculate the proportion  
137 of non-neutral replicates that fall in this top 1% as the power. To compute the false positive rate,  
138 we compute the proportion of neutral simulations that fall within the top 1%.

139 To compute power for XP-EHH and XP-nSL, we follow the approach of Szpiech et al.  
140 (2021). For these statistics, each non-neutral replicate is individually normalized jointly with all  
141 matching neutral replicates. Because extreme values of the statistic are likely to be clustered  
142 along the genome (Szpiech, et al. 2021), we then compute the proportion of extreme scores  
143 ( $XP-EHH > 2$  or  $XP-nSL > 2$ ) within 100kbp non-overlapping windows. We then bin these  
144 windows into 10 quantile bins based on the number of scores observed in each window and call  
145 the top 1% of these windows as putatively under selection. We calculate the proportion of non-

146 neutral replicates that fall in this top 1% as the power. To compute the false positive rate, we  
147 compute the proportion of neutral simulations that fall within the top 1%.

## 148 **4 Results**

149 We find that the unphased versions of iHS and nSL have good power (Figures 1, S1-S4,  
150 S13-16, and S21-24) to detect selection prior to fixation of the allele, with nSL generally  
151 outperforming iHS. In smaller populations (Figure 1C and 1D), power does suffer relative to  
152 larger populations (Figure 1A, 1B, 1E, 1F). Each of these statistics also have low false positive  
153 rates hovering around 1% (Table S1).

154 Similarly, we find that the unphased versions of XP-EHH and XP-nSL have good power  
155 as well (Figures 2, 3, S5-S12, S17-S20, and S25-S32). When the sweep takes place in the  
156 smaller of the two populations (Figure 2C and 2D), we see a similar decrease in power. When  
157 one population is undergoing exponential growth (Figure 3) performance is generally quite  
158 good, likely the result of a larger effective selection coefficient in large populations. These two-  
159 population statistics generally outperform their single-population counterparts, especially for  
160 sweeps that have reached fixation recently. Each of these statistics also have low false positive  
161 rates hovering around 1% (Table S1).

## 162 **5 Discussion**

163 We introduce multi-locus genotype versions of four popular haplotype-based selection  
164 statistics—iHS (Voight, et al. 2006), nSL (Ferrer-Admetlla, et al. 2014), XP-EHH (Sabeti, et al.  
165 2007), and XP-nSL (Szpiech, et al. 2021)—that can be used when the phase of genotypes is  
166 unknown. We implement these updates in the latest v2.0 update of the program selscan  
167 (Szpiech and Hernandez 2014), with source code and pre-compiled binaries available at  
168 <https://www.github.com/szpiech/selscan>.

## 169 **6 Acknowledgements**

170 This work was supported by start-up funds from the Pennsylvania State University's  
 171 Department of Biology. Computations for this research were performed using the Pennsylvania  
 172 State University's Institute for Computational Data Sciences' Roar supercomputer.

173

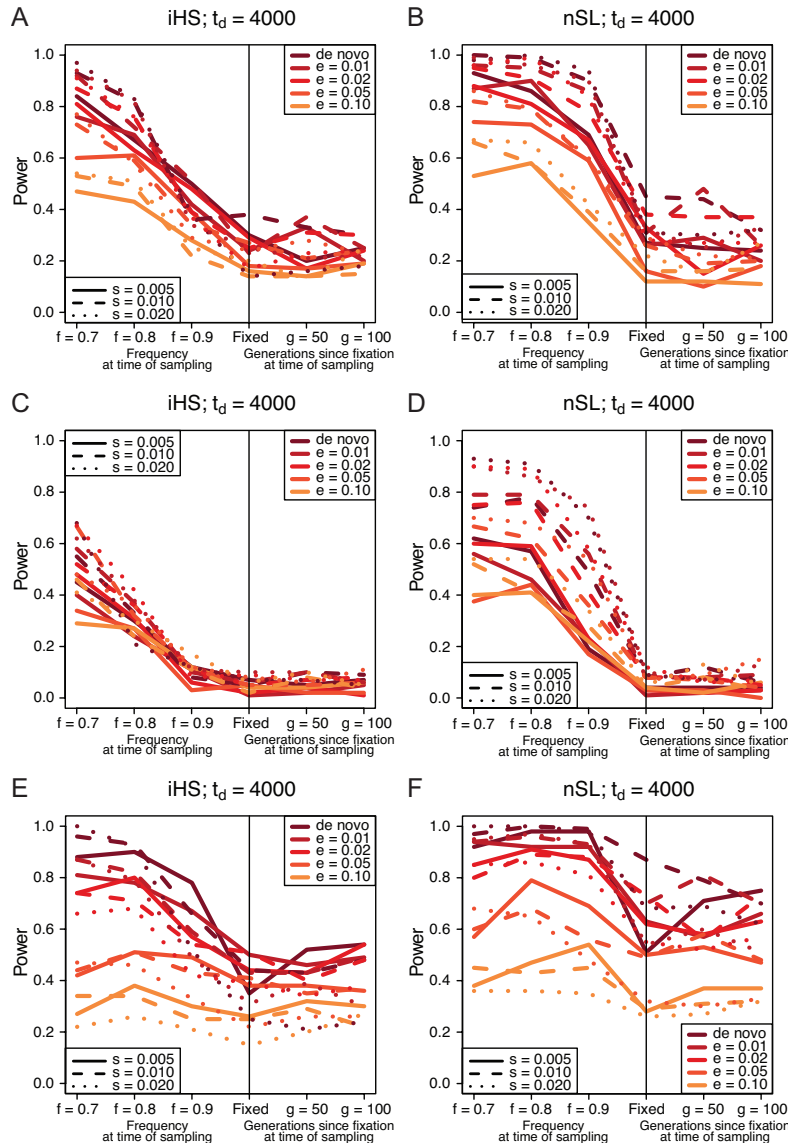

174

175 **Figure 1.** Power curves for unphased implementations of iHS (A, C, and E) and nSL (B, D, and

176 F) under demographic histories Demo 1 (A and B), Demo 3 (C and D), and Demo 4 (E and F). *s*

177 is the selection coefficient, *f* is the frequency of the adaptive allele at time of sampling, *g* is the

178 number of generations at time of sampling since fixation, *e* is the frequency at which selection

179 began, and *t<sub>d</sub>* is the time in generations since the two populations diverged.



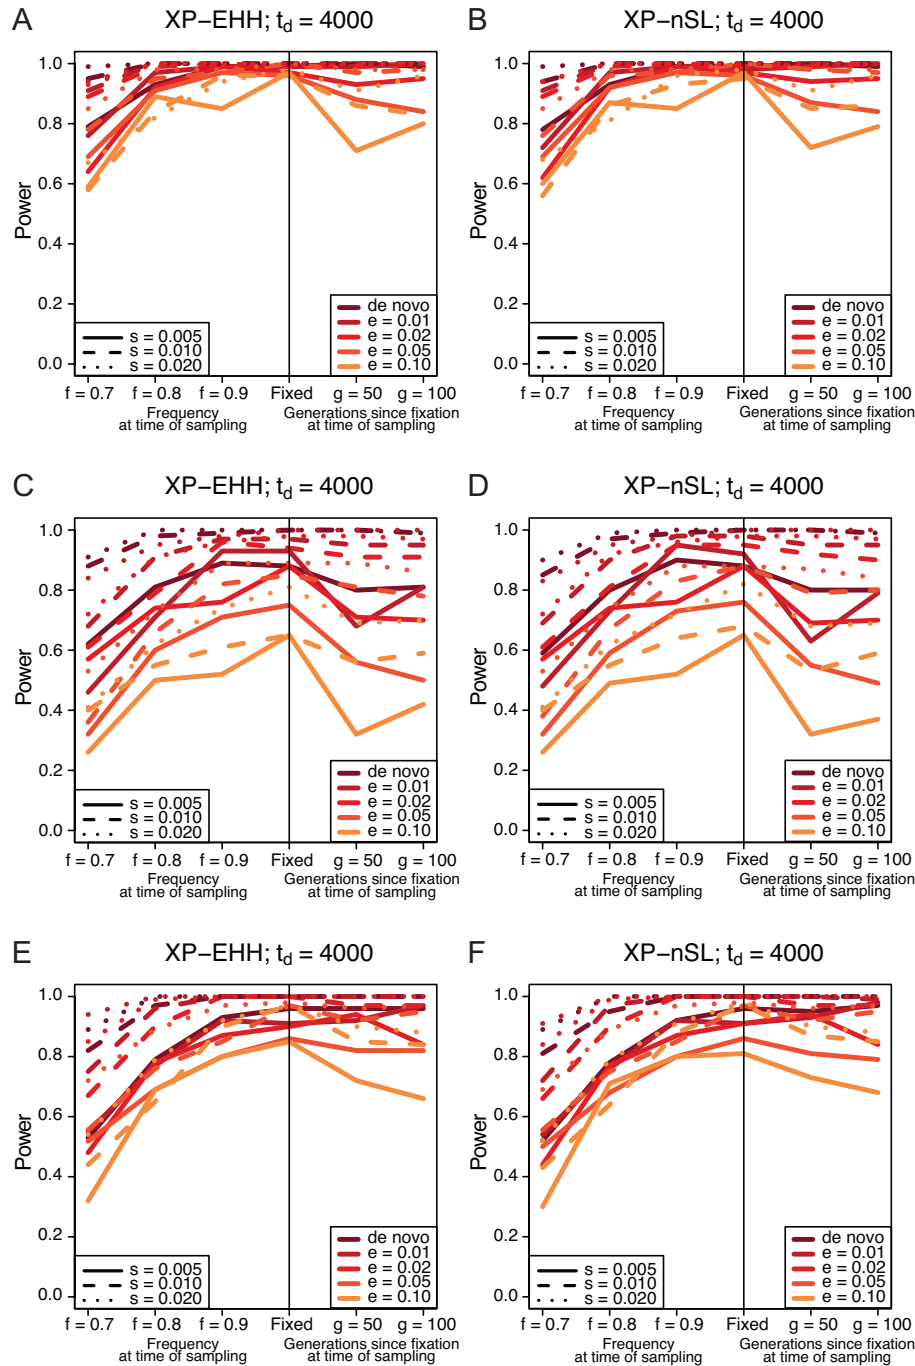

180

181 **Figure 2.** Power curves for unphased implementations of XP-EHH (A, C, and E) and XP-nSL  
 182 (B, D, and F) under demographic histories Demo 1 (A and B), Demo 2 (C and D), and Demo 3  
 183 (E and F).  $s$  is the selection coefficient,  $f$  is the frequency of the adaptive allele at time of  
 184 sampling,  $g$  is the number of generations at time of sampling since fixation,  $e$  is the frequency at  
 185 which selection began, and  $t_d$  is the time in generations since the two populations diverged.

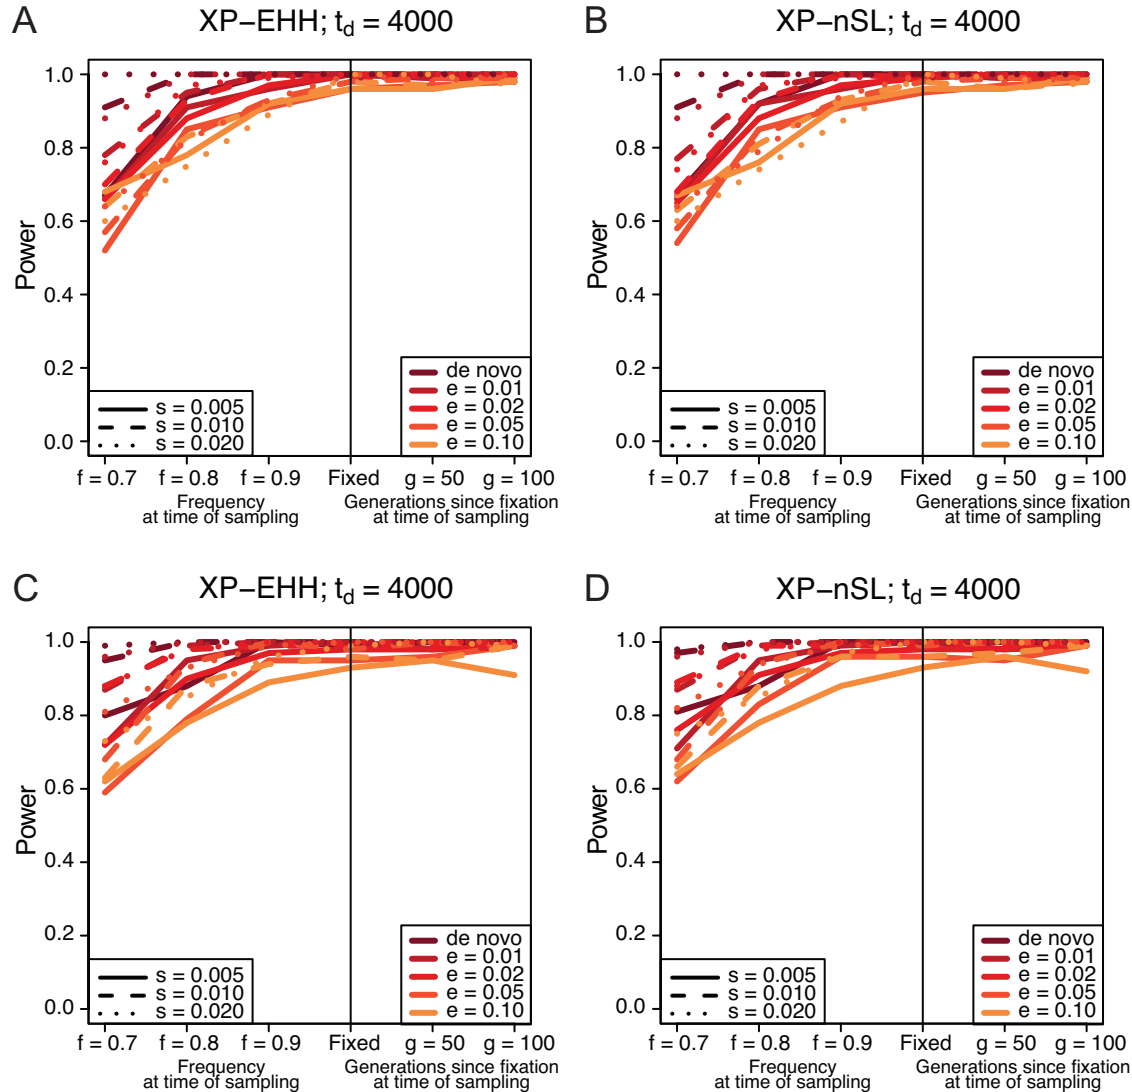

186

187 **Figure 3.** Power curves for unphased implementations of XP-EHH (A and C) and XP-nSL (B

188 and D) under demographic histories Demo 4 (A and B), and Demo 5 (C and D).  $s$  is the

189 selection coefficient,  $f$  is the frequency of the adaptive allele at time of sampling,  $g$  is the

190 number of generations at time of sampling since fixation,  $e$  is the frequency at which selection

191 began, and  $t_d$  is the time in generations since the two populations diverged.

192

193

194

195

iHS;  $t_d = 2000$

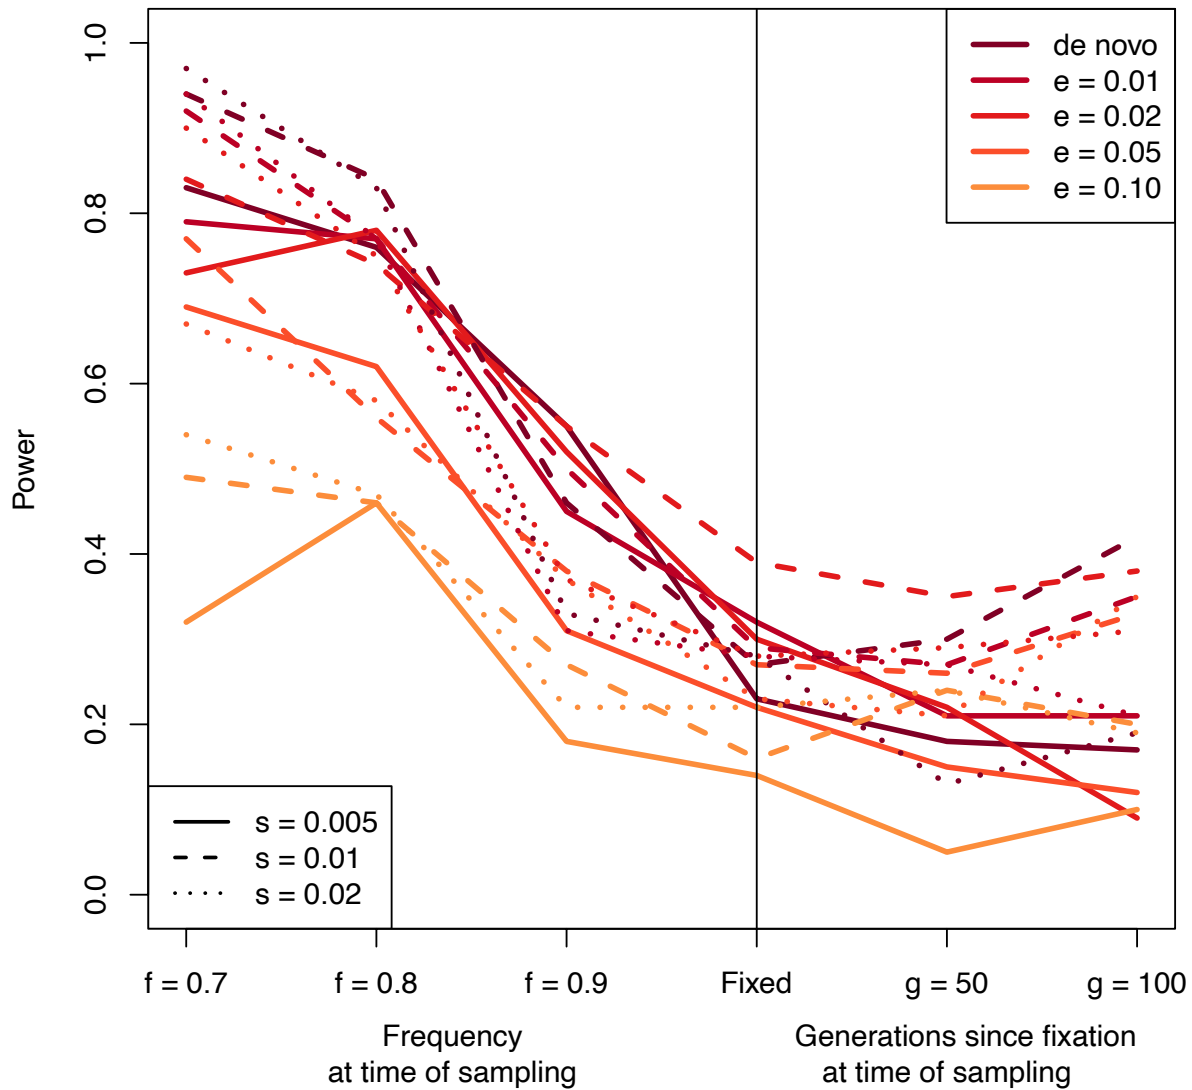

196

197 **Figure S1.** Demo 1 iHS  $t_d = 2000$  power curves.  $s$  is the selection coefficient,  $f$  is the  
198 frequency of the adaptive allele at time of sampling,  $g$  is the number of generations at time of  
199 sampling since fixation,  $e$  is the frequency at which selection began, and  $t_d$  is the time in  
200 generations since the two populations diverged.

iHS;  $t_d = 8000$

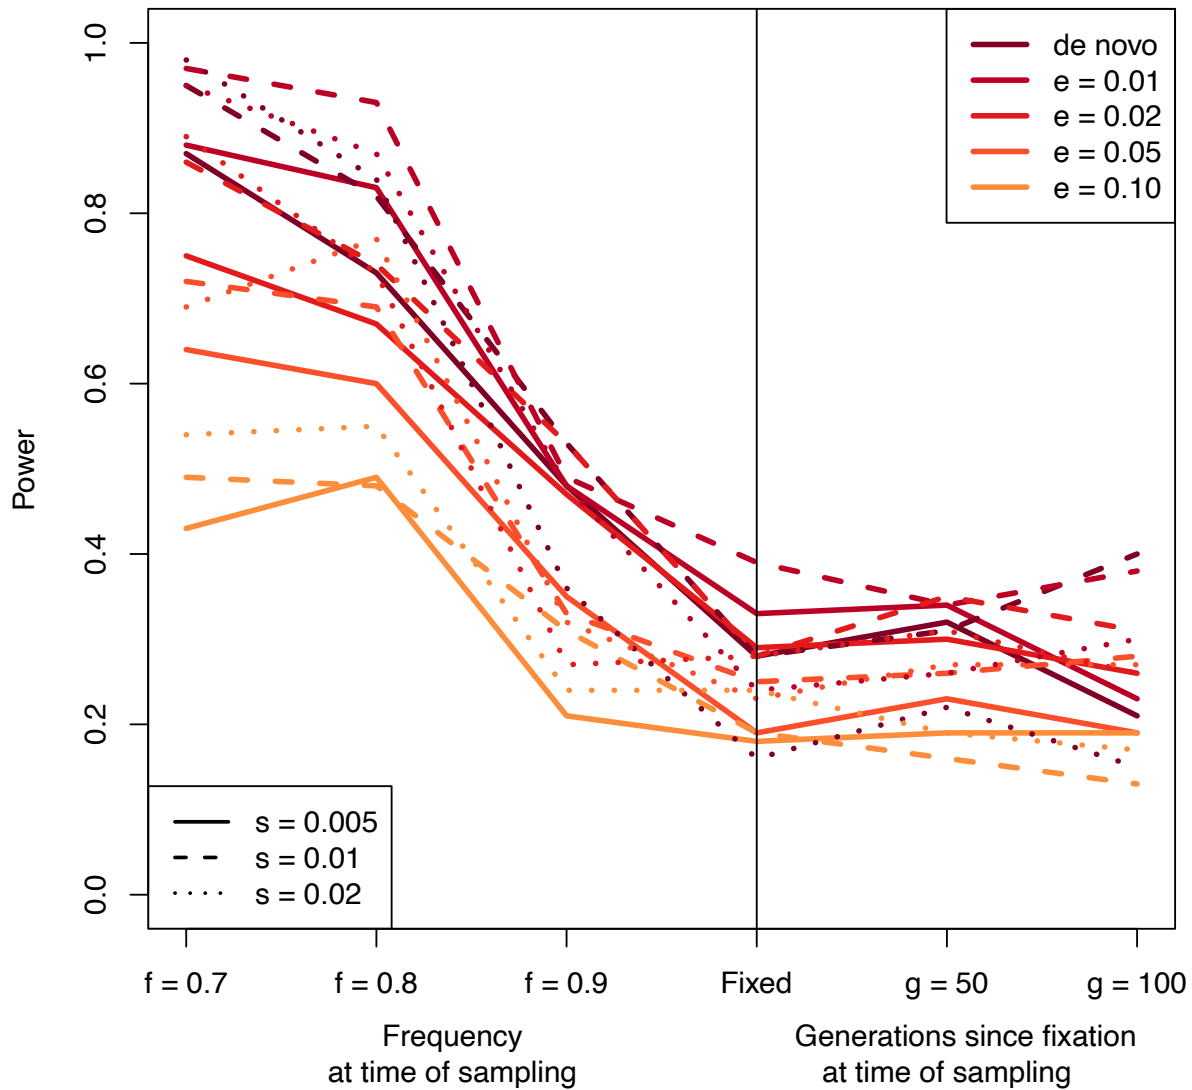

201

202 **Figure S2.** Demo 1 iHS  $t_d = 8000$  power curves.  $s$  is the selection coefficient,  $f$  is the  
203 frequency of the adaptive allele at time of sampling,  $g$  is the number of generations at time of  
204 sampling since fixation,  $e$  is the frequency at which selection began, and  $t_d$  is the time in  
205 generations since the two populations diverged.

nSL;  $t_d = 2000$

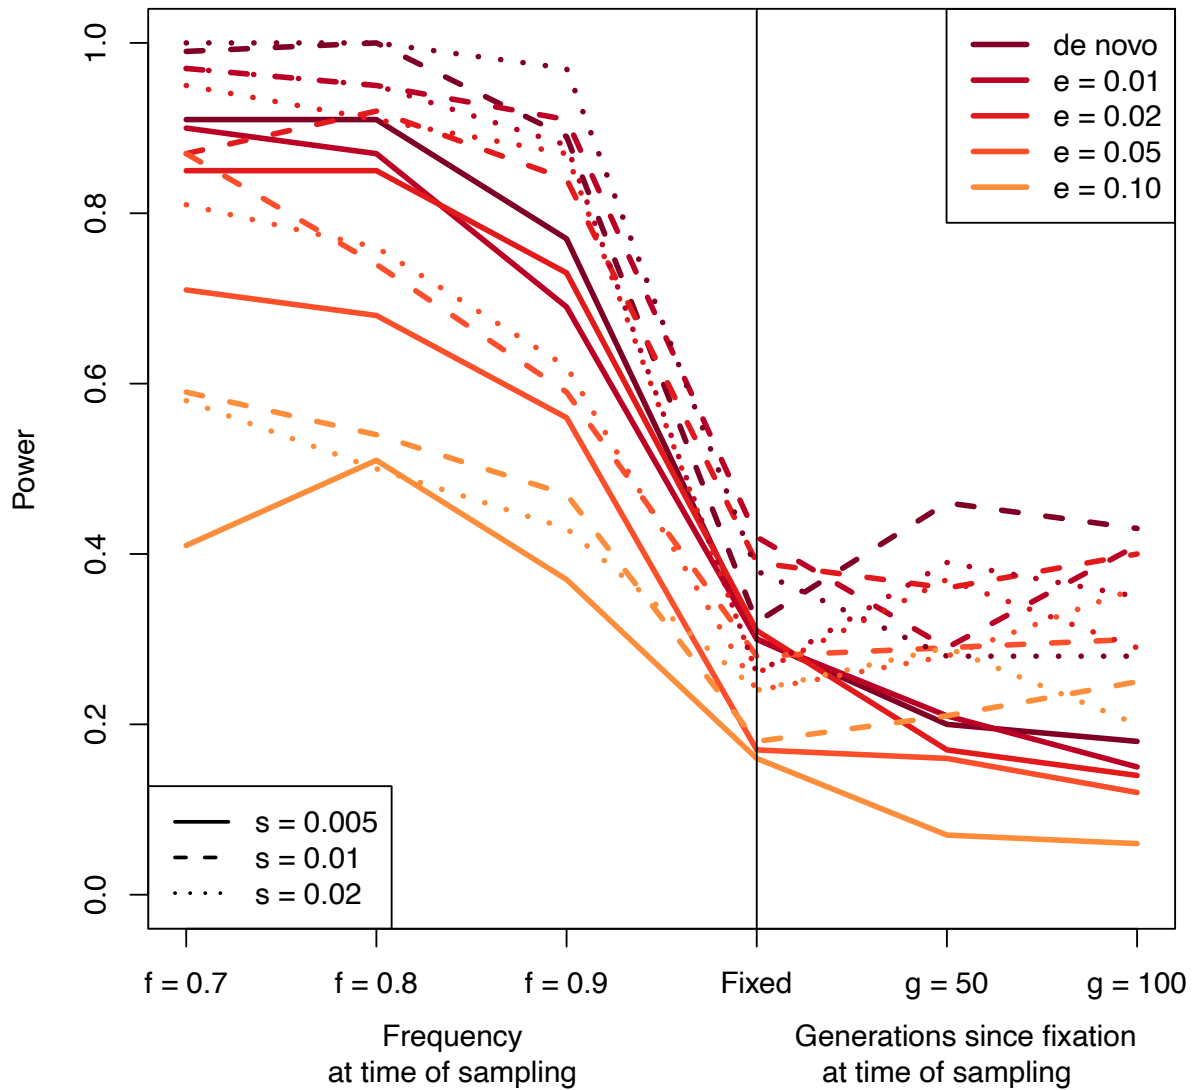

206

207 **Figure S3.** Demo 1 nSL  $t_d = 2000$  power curves.  $s$  is the selection coefficient,  $f$  is the  
208 frequency of the adaptive allele at time of sampling,  $g$  is the number of generations at time of  
209 sampling since fixation,  $e$  is the frequency at which selection began, and  $t_d$  is the time in  
210 generations since the two populations diverged.

nSL;  $t_d = 8000$

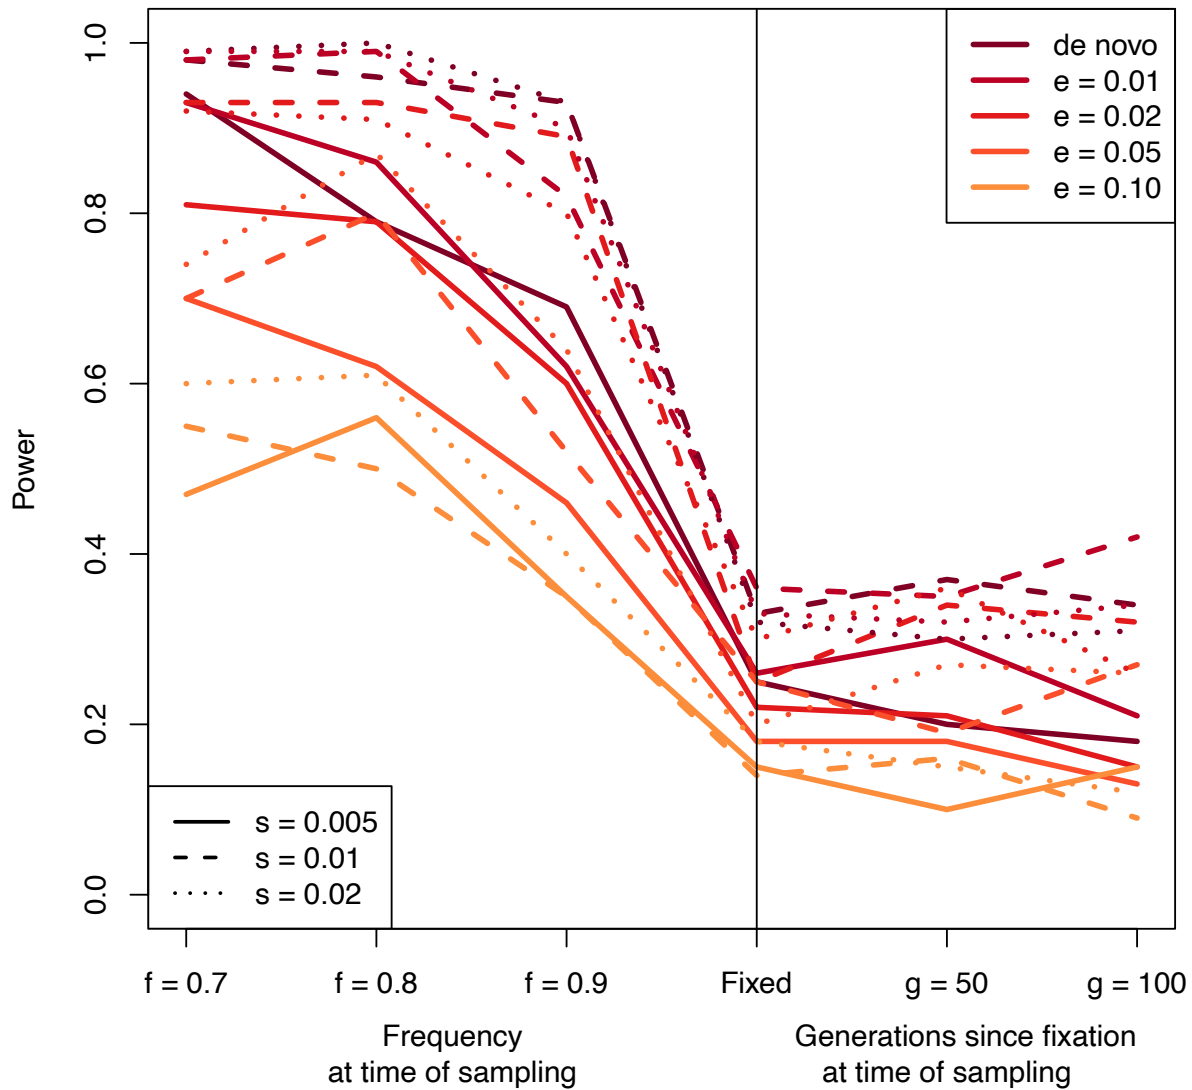

211

212 **Figure S4.** Demo 1 nSL  $t_d = 8000$  power curves.  $s$  is the selection coefficient,  $f$  is the  
213 frequency of the adaptive allele at time of sampling,  $g$  is the number of generations at time of  
214 sampling since fixation,  $e$  is the frequency at which selection began, and  $t_d$  is the time in  
215 generations since the two populations diverged.

XP-EHH;  $t_d = 2000$

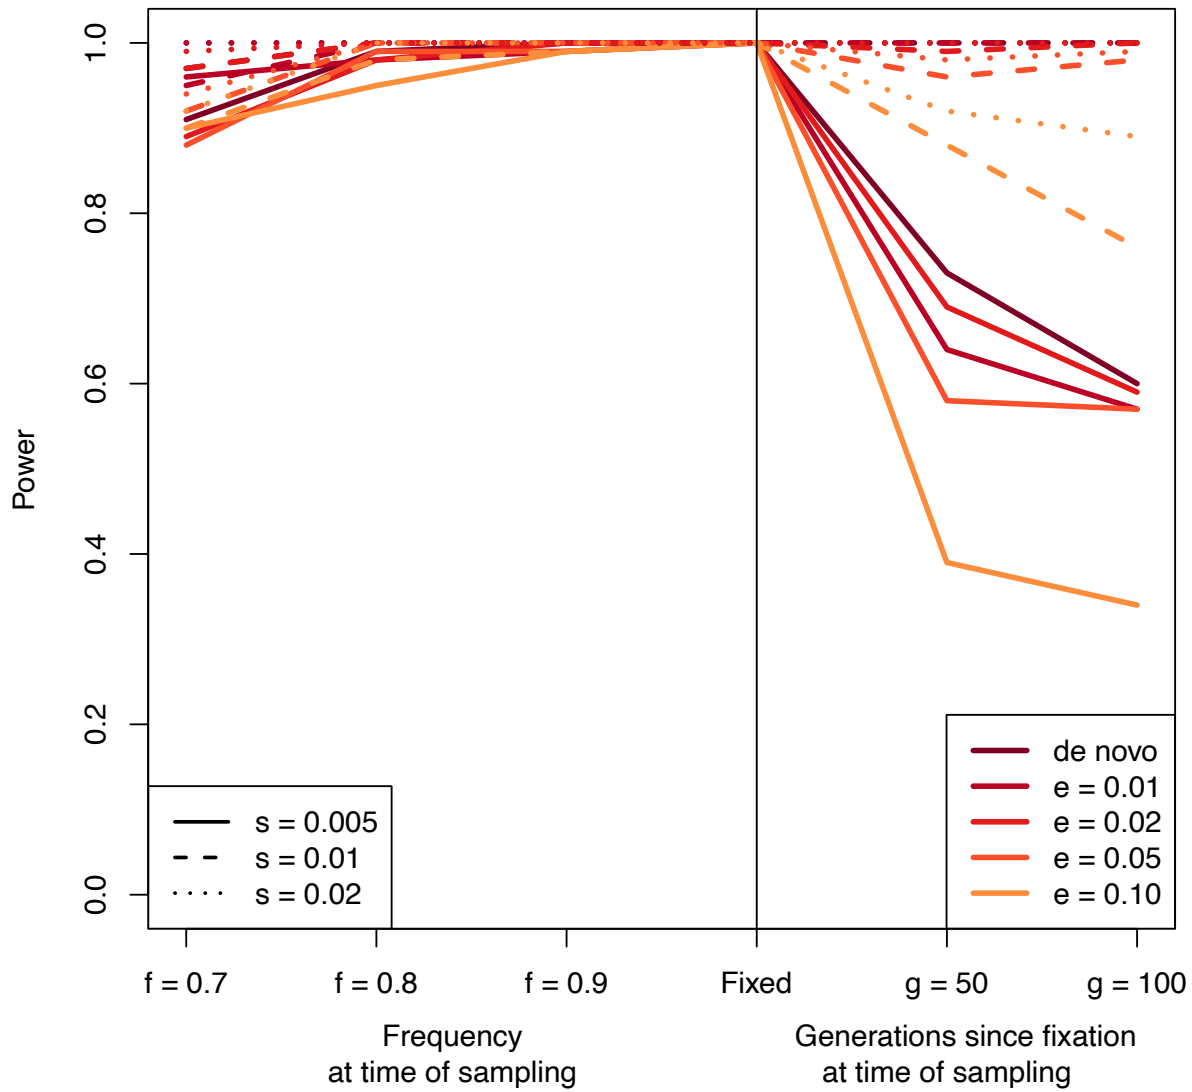

216

217 **Figure S5.** Demo 1 XP-EHH  $t_d = 2000$  power curves.  $s$  is the selection coefficient,  $f$  is the  
218 frequency of the adaptive allele at time of sampling,  $g$  is the number of generations at time of  
219 sampling since fixation,  $e$  is the frequency at which selection began, and  $t_d$  is the time in  
220 generations since the two populations diverged.

XP-EHH;  $t_d = 8000$

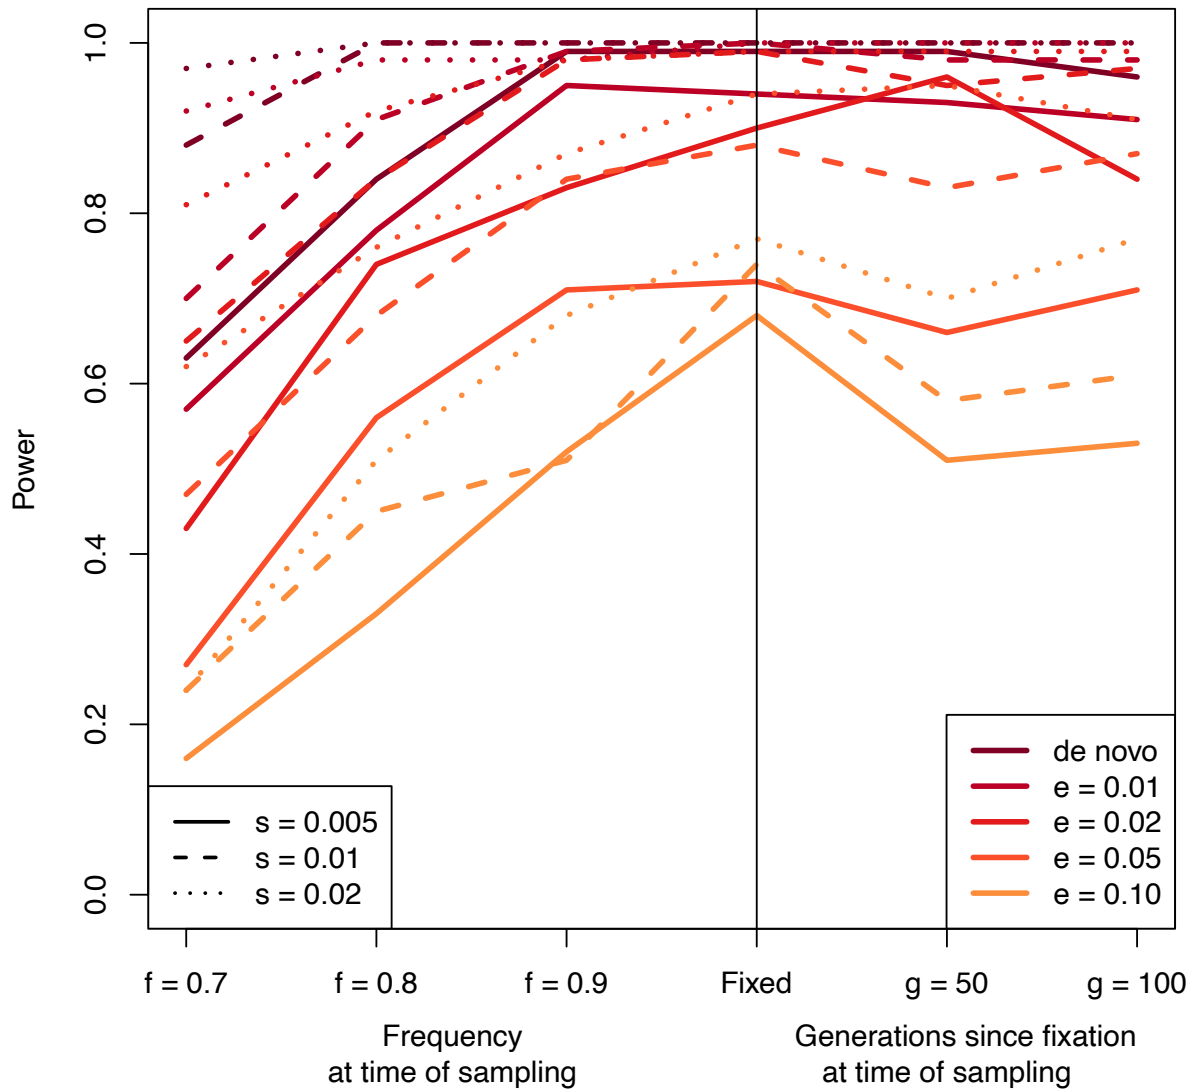

221

222 **Figure S6.** Demo 1 XP-EHH  $t_d = 8000$  power curves.  $s$  is the selection coefficient,  $f$  is the  
223 frequency of the adaptive allele at time of sampling,  $g$  is the number of generations of  
224 sampling since fixation,  $e$  is the frequency at which selection began, and  $t_d$  is the time in  
225 generations since the two populations diverged.



XP-nSL;  $t_d = 2000$

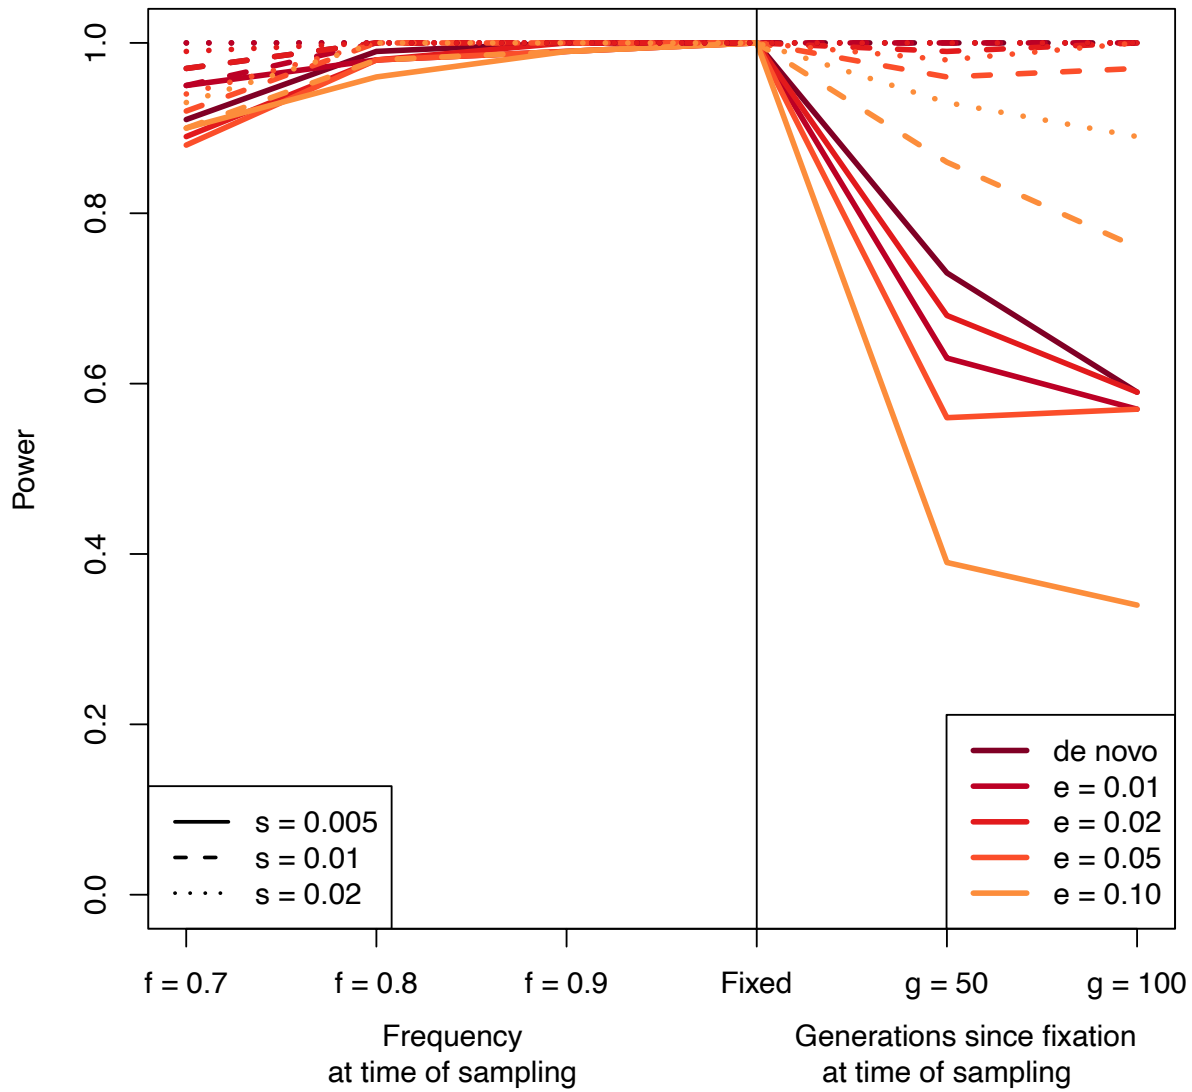

226

227 **Figure S7.** Demo 1 XP-nSL  $t_d = 2000$  power curves.  $s$  is the selection coefficient,  $f$  is the  
228 frequency of the adaptive allele at time of sampling,  $g$  is the number of generations at time of  
229 sampling since fixation,  $e$  is the frequency at which selection began, and  $t_d$  is the time in  
230 generations since the two populations diverged.

XP-nSL;  $t_d = 8000$

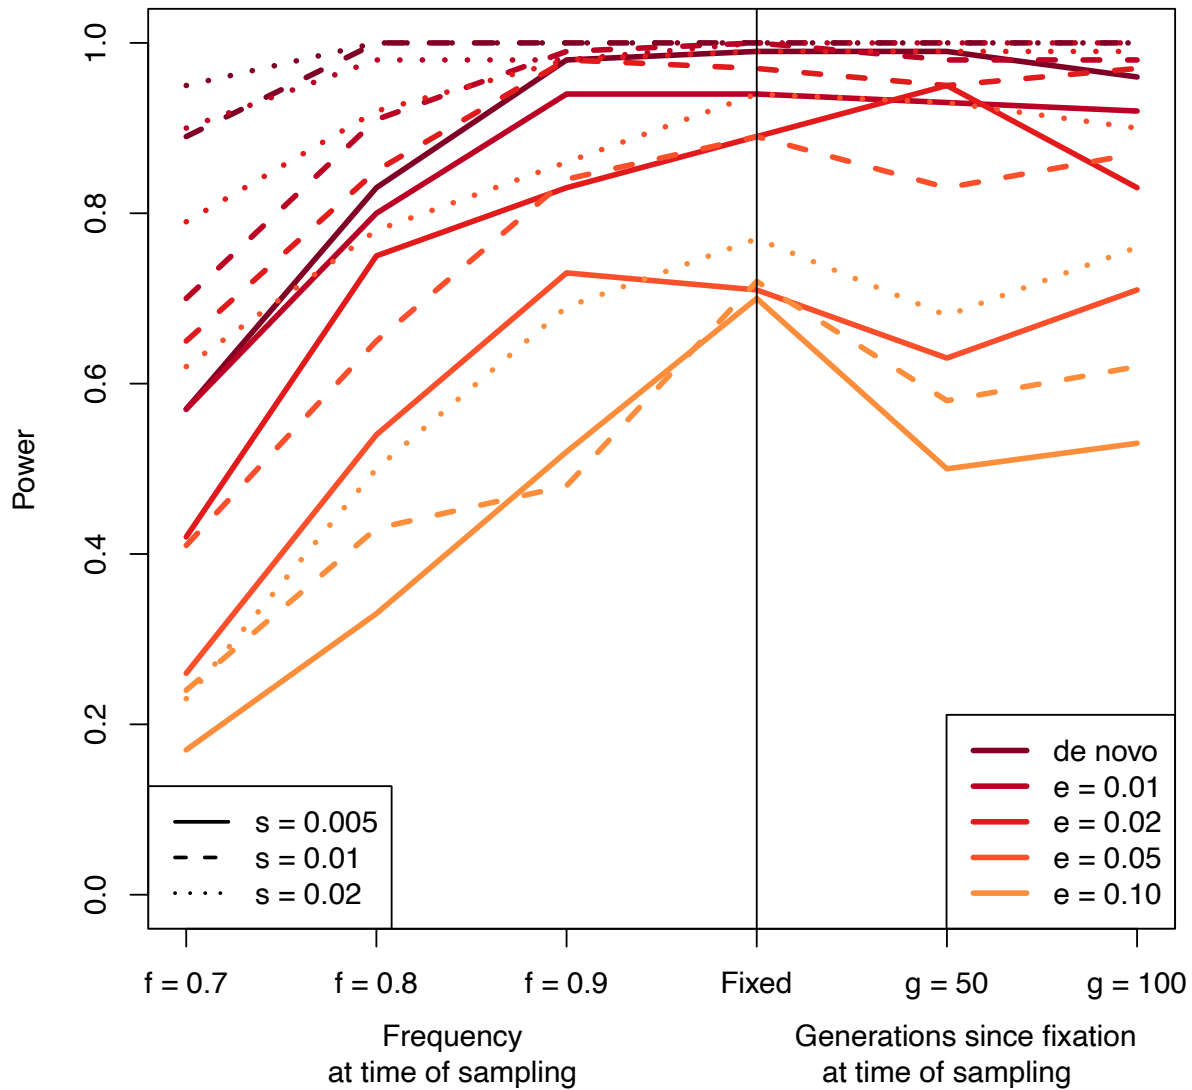

231

232 **Figure S8.** Demo 1 XP-nSL  $t_d = 8000$  power curves.  $s$  is the selection coefficient,  $f$  is the  
233 frequency of the adaptive allele at time of sampling,  $g$  is the number of generations at time of  
234 sampling since fixation,  $e$  is the frequency at which selection began, and  $t_d$  is the time in  
235 generations since the two populations diverged.

XP-EHH;  $t_d = 2000$

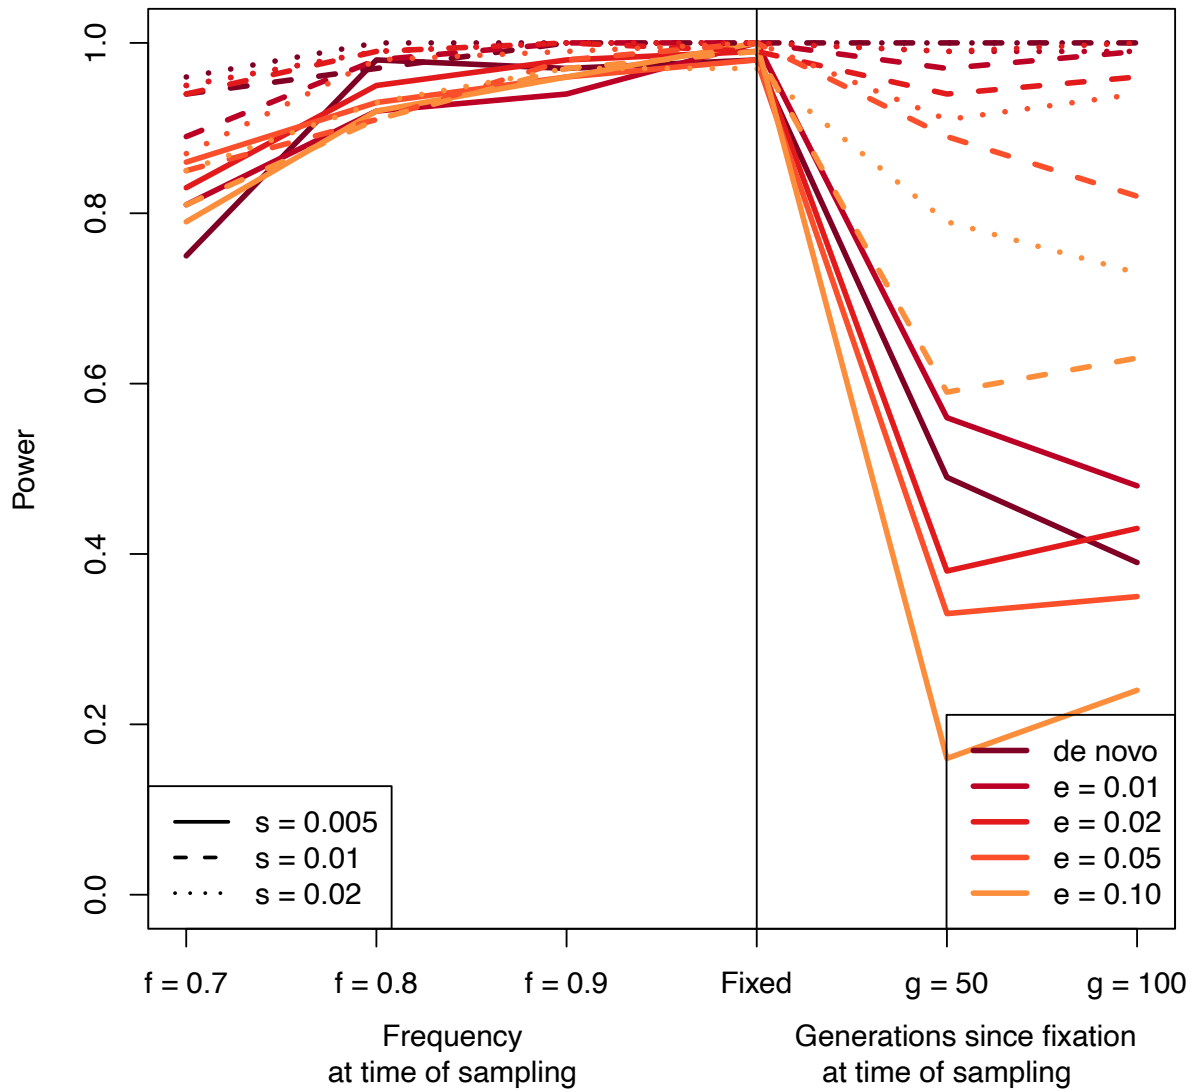

236

237 **Figure S9.** Demo 2 XP-EHH  $t_d = 2000$  power curves.  $s$  is the selection coefficient,  $f$  is the  
238 frequency of the adaptive allele at time of sampling,  $g$  is the number of generations of  
239 sampling since fixation,  $e$  is the frequency at which selection began, and  $t_d$  is the time in  
240 generations since the two populations diverged.

XP-EHH;  $t_d = 8000$

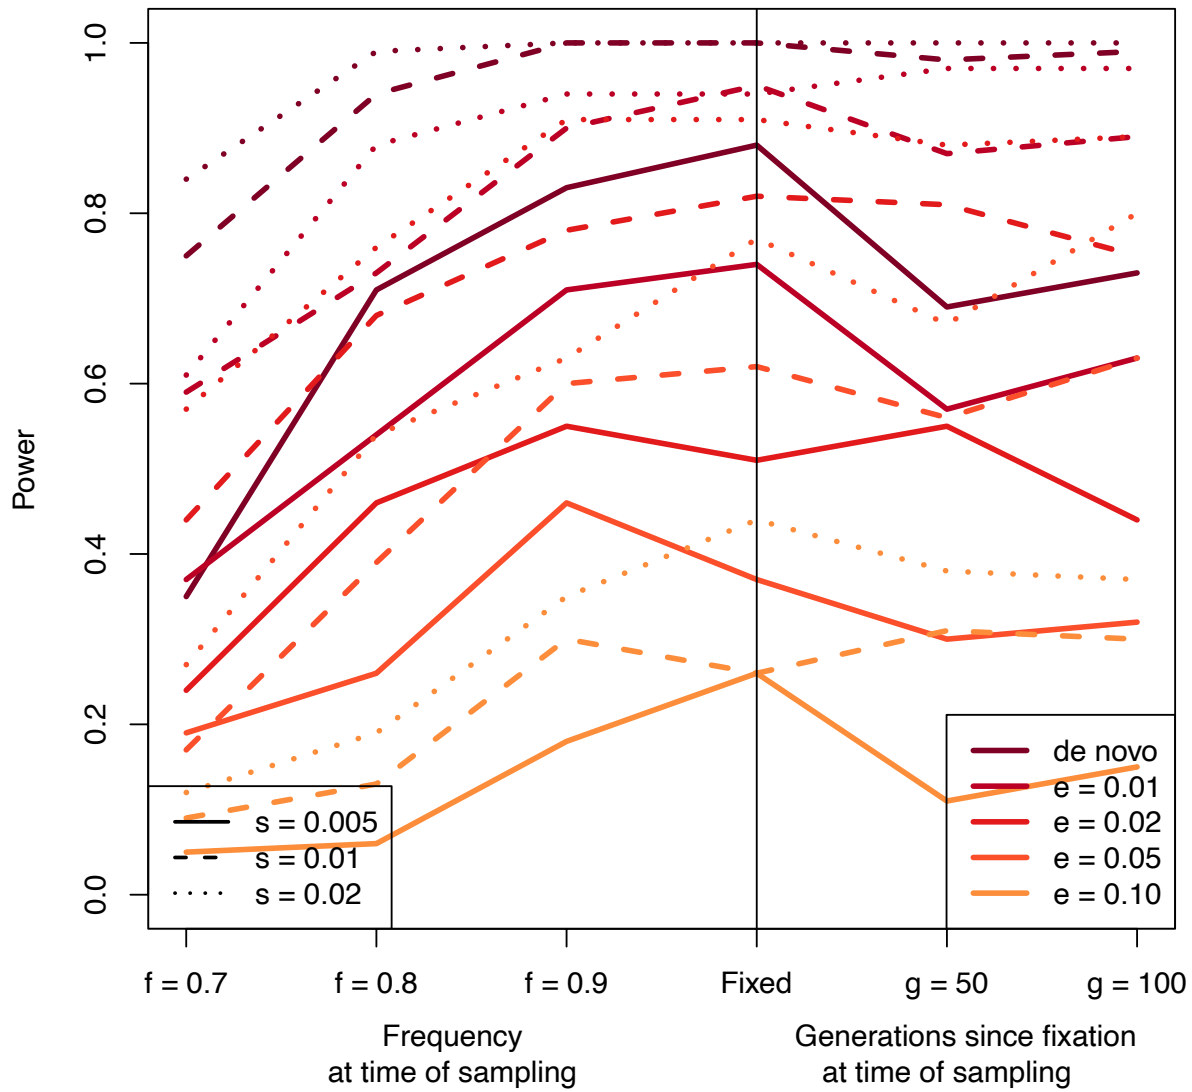

241

242 **Figure S10.** Demo 2 XP-EHH  $t_d = 8000$  power curves.  $s$  is the selection coefficient,  $f$  is the  
243 frequency of the adaptive allele at time of sampling,  $g$  is the number of generations at time of  
244 sampling since fixation,  $e$  is the frequency at which selection began, and  $t_d$  is the time in  
245 generations since the two populations diverged.

XP-nSL;  $t_d = 2000$

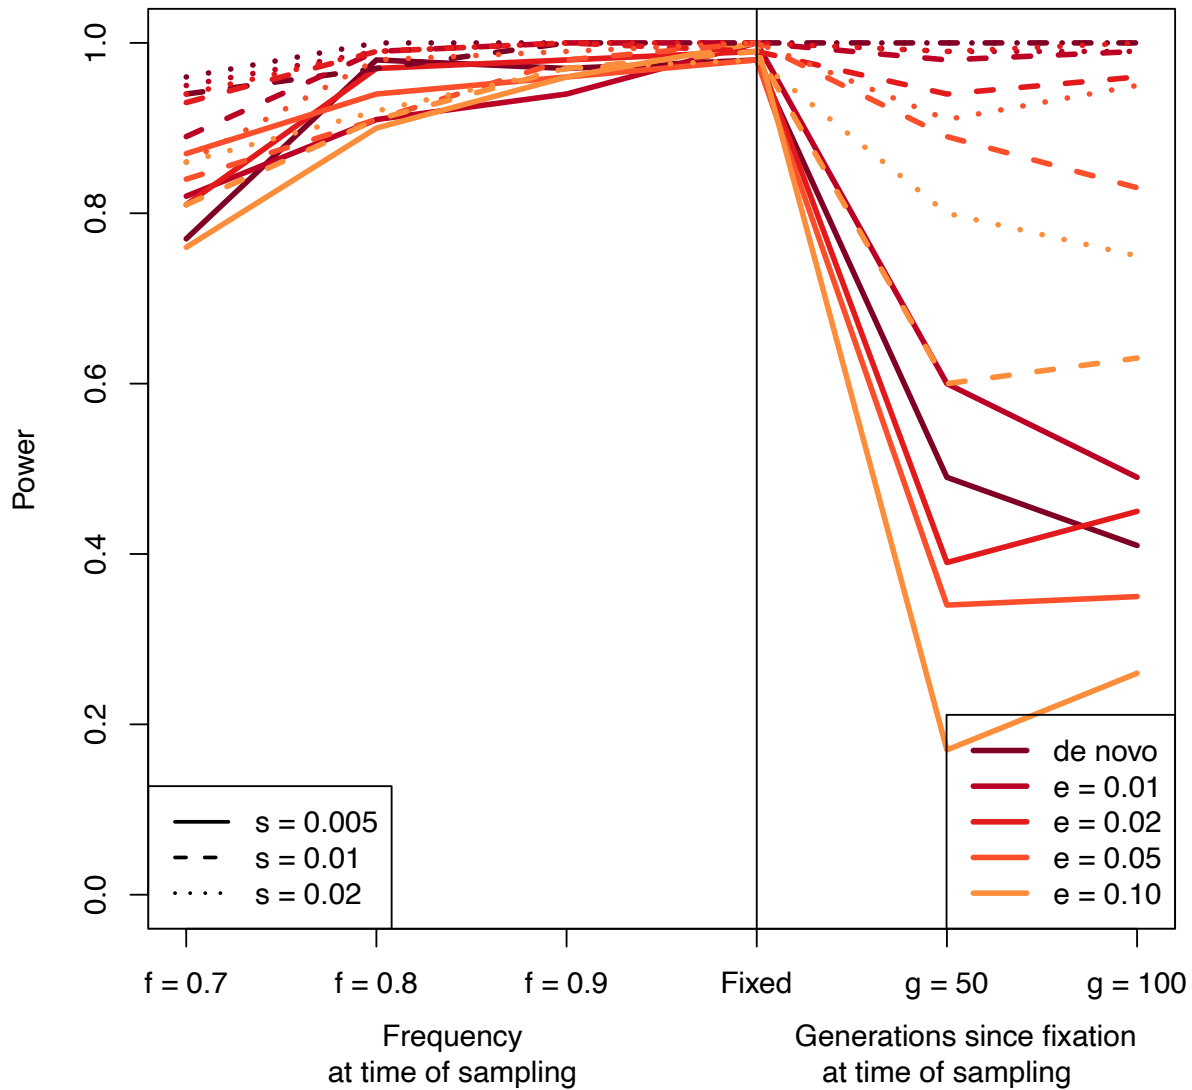

246

247 **Figure S11.** Demo 2 XP-nSL  $t_d = 2000$  power curves.  $s$  is the selection coefficient,  $f$  is the  
248 frequency of the adaptive allele at time of sampling,  $g$  is the number of generations at time of  
249 sampling since fixation,  $e$  is the frequency at which selection began, and  $t_d$  is the time in  
250 generations since the two populations diverged.

XP-nSL;  $t_d = 8000$

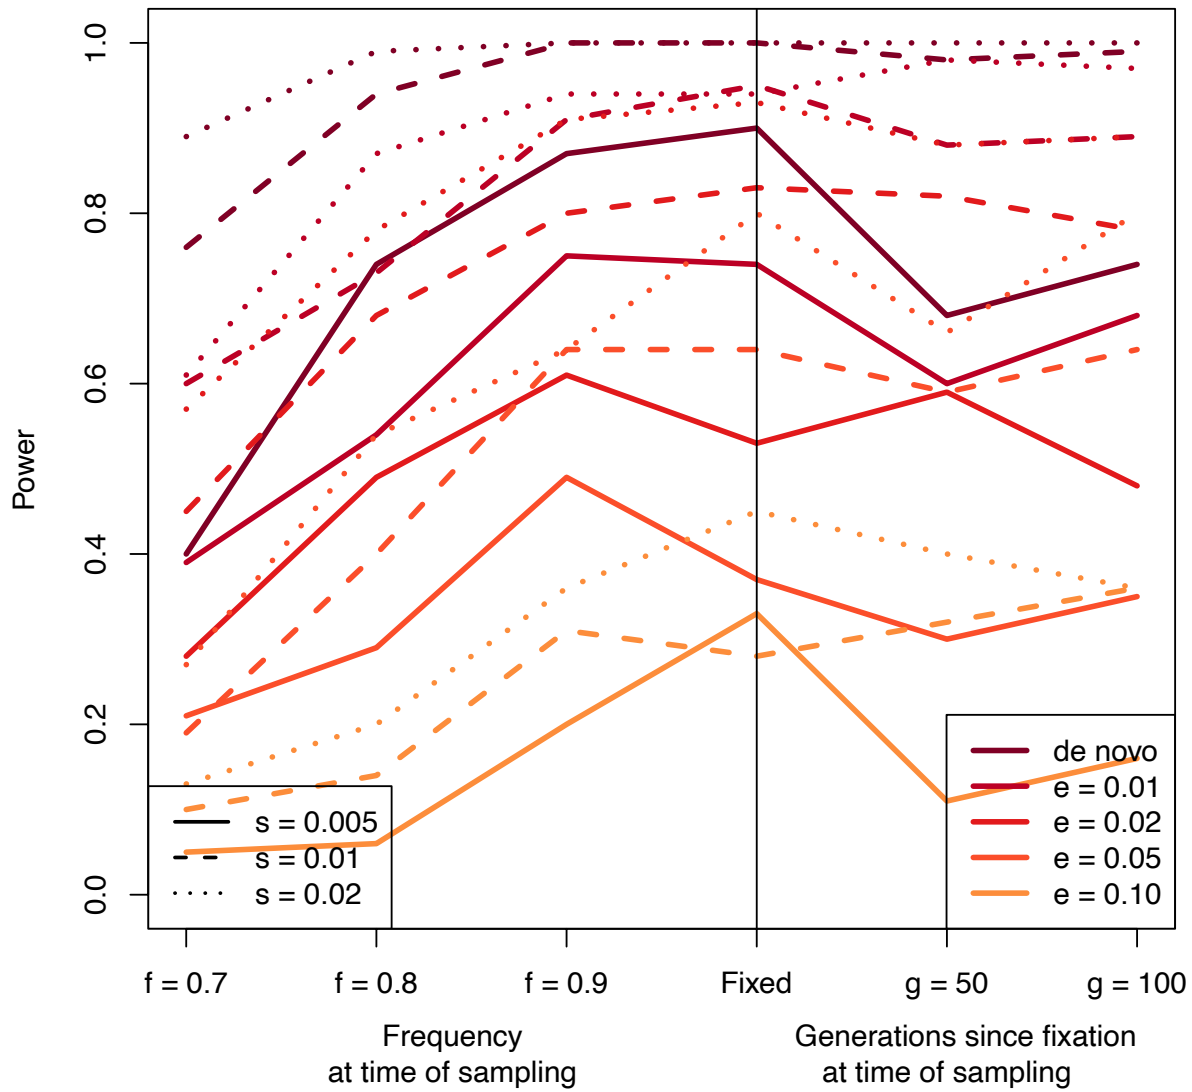

251

252 **Figure S12.** Demo 2 XP-nSL  $t_d = 8000$  power curves.  $s$  is the selection coefficient,  $f$  is the  
253 frequency of the adaptive allele at time of sampling,  $g$  is the number of generations at time of  
254 sampling since fixation,  $e$  is the frequency at which selection began, and  $t_d$  is the time in  
255 generations since the two populations diverged.

iHS;  $t_d = 2000$

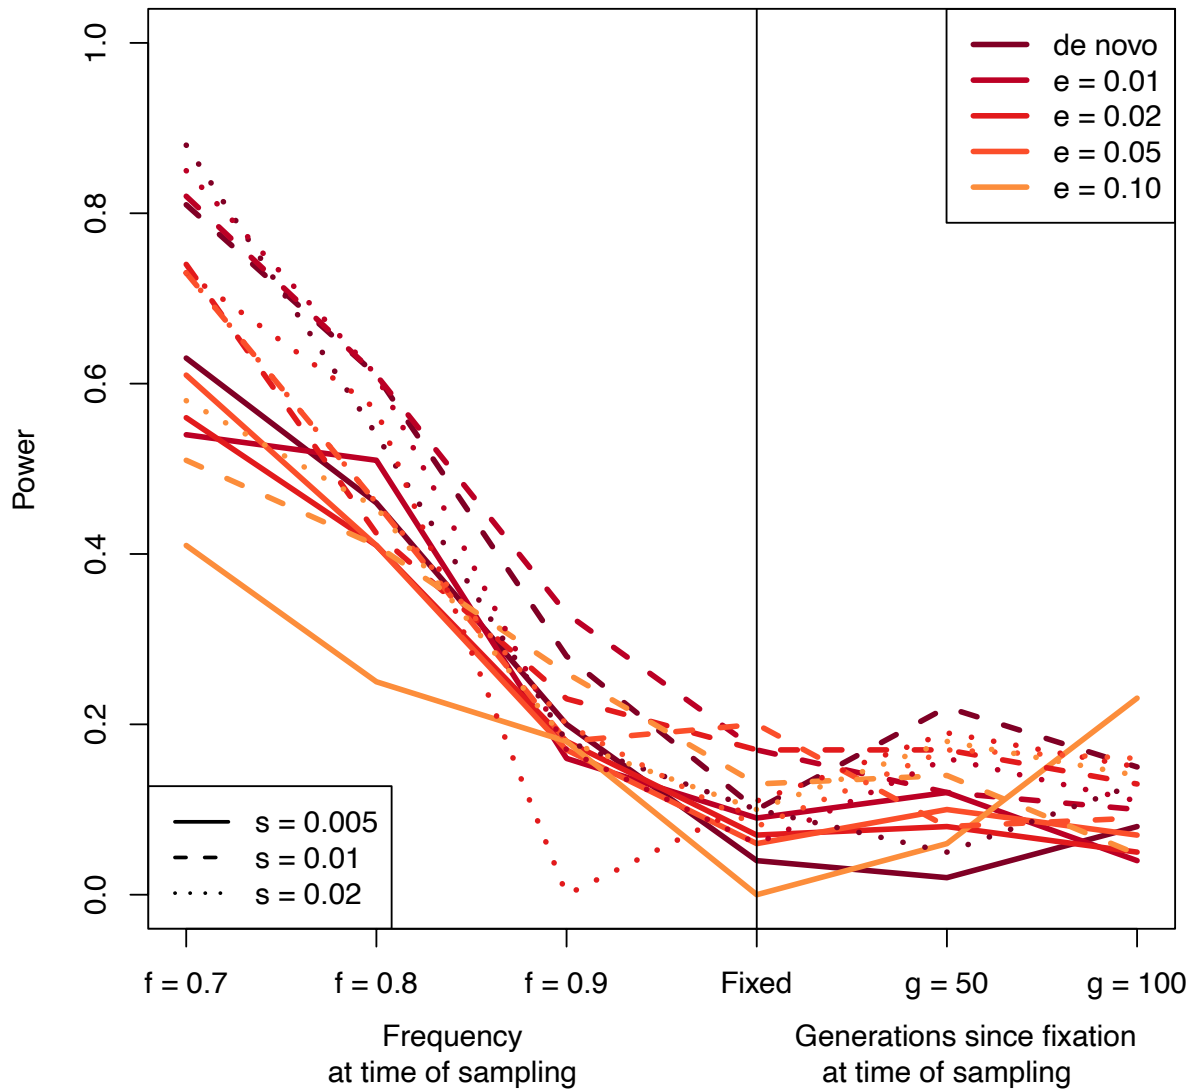

256

257 **Figure S13.** Demo 3 iHS  $t_d = 2000$  power curves.  $s$  is the selection coefficient,  $f$  is the  
258 frequency of the adaptive allele at time of sampling,  $g$  is the number of generations at time of  
259 sampling since fixation,  $e$  is the frequency at which selection began, and  $t_d$  is the time in  
260 generations since the two populations diverged.

iHS;  $t_d = 8000$

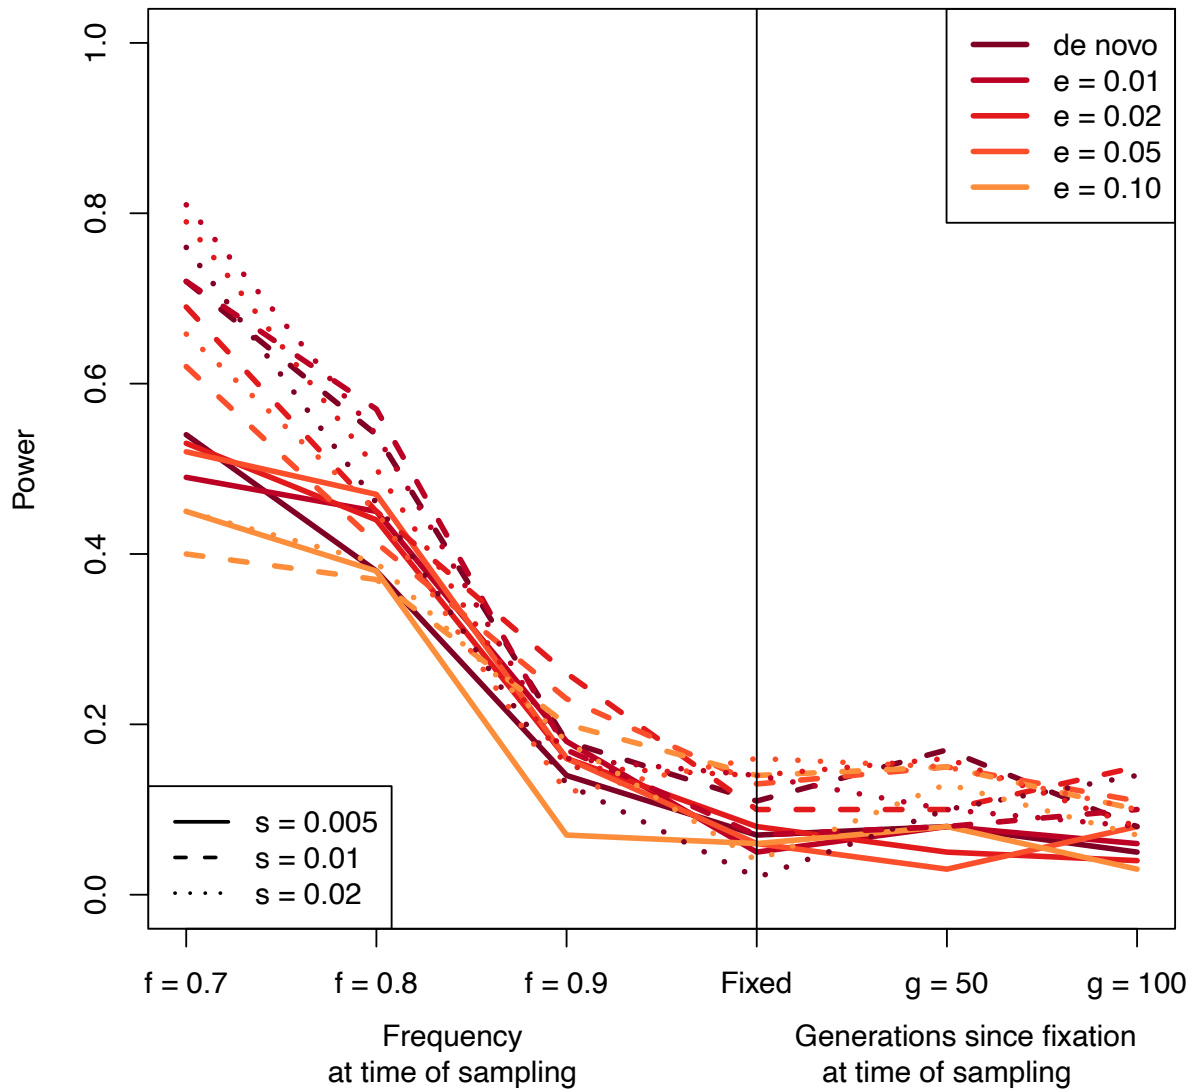

261

262 **Figure S14.** Demo 3 iHS  $t_d = 8000$  power curves.  $s$  is the selection coefficient,  $f$  is the  
263 frequency of the adaptive allele at time of sampling,  $g$  is the number of generations at time of  
264 sampling since fixation,  $e$  is the frequency at which selection began, and  $t_d$  is the time in  
265 generations since the two populations diverged.



nSL;  $t_d = 2000$

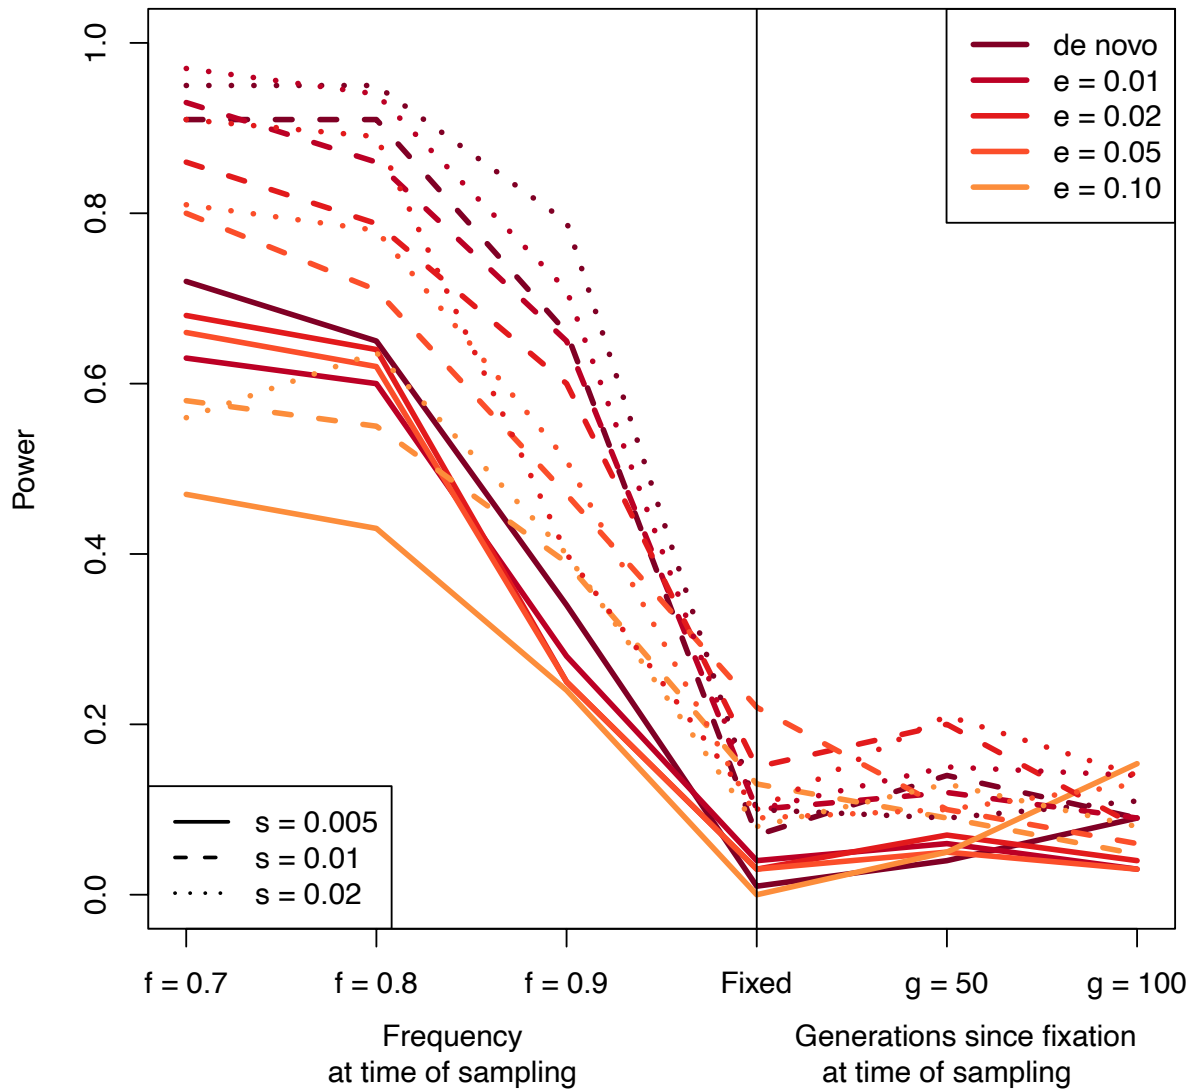

266

267 **Figure S15.** Demo 3 nSL  $t_d = 2000$  power curves.  $s$  is the selection coefficient,  $f$  is the  
268 frequency of the adaptive allele at time of sampling,  $g$  is the number of generations at time of  
269 sampling since fixation,  $e$  is the frequency at which selection began, and  $t_d$  is the time in  
270 generations since the two populations diverged.

nSL;  $t_d = 8000$

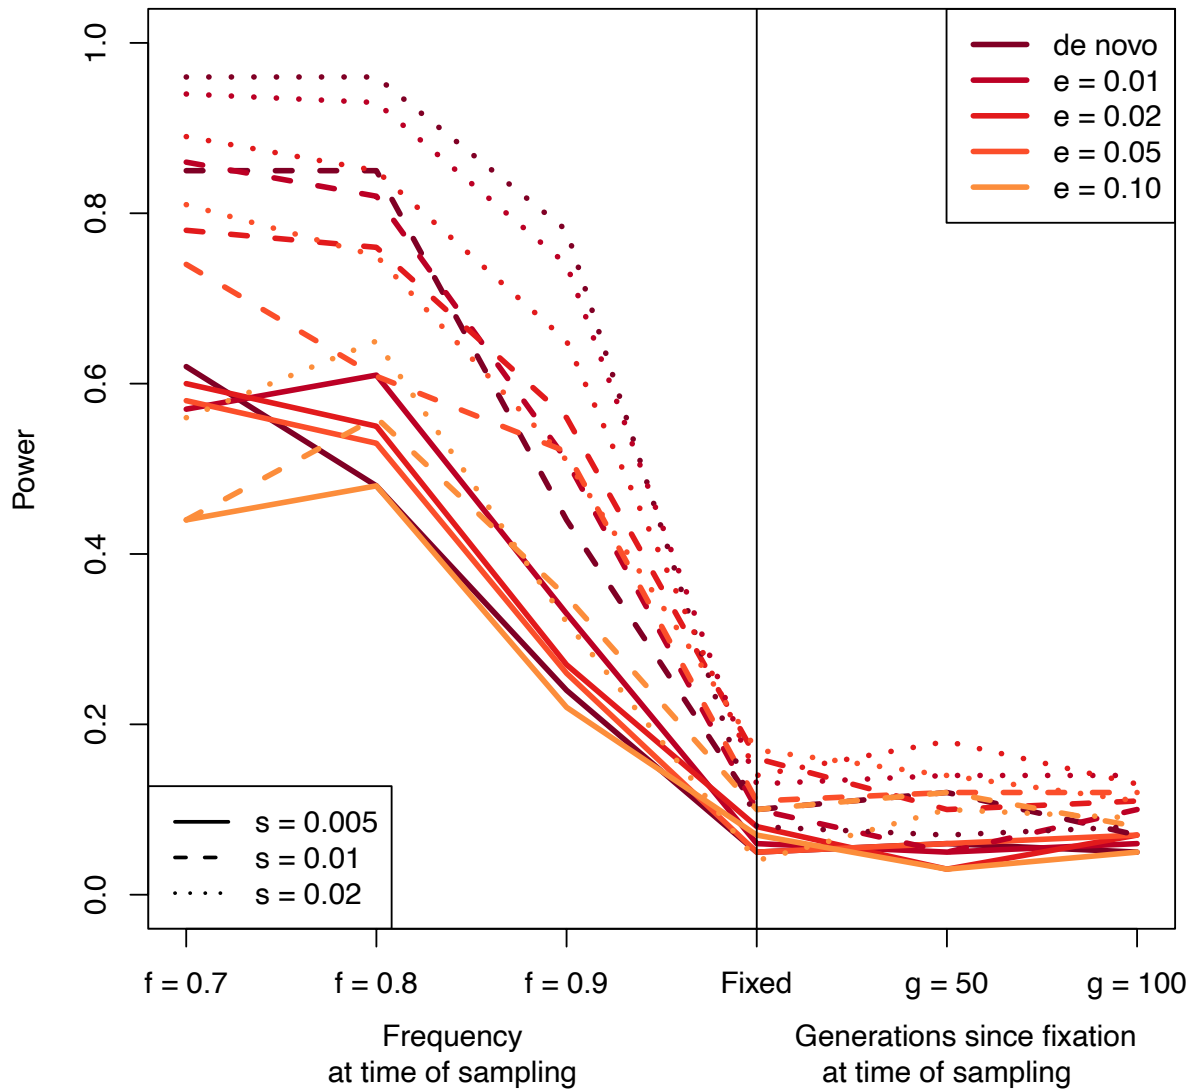

271

272 **Figure S16.** Demo 3 nSL  $t_d = 8000$  power curves.  $s$  is the selection coefficient,  $f$  is the  
273 frequency of the adaptive allele at time of sampling,  $g$  is the number of generations at time of  
274 sampling since fixation,  $e$  is the frequency at which selection began, and  $t_d$  is the time in  
275 generations since the two populations diverged.

XP-EHH;  $t_d = 2000$

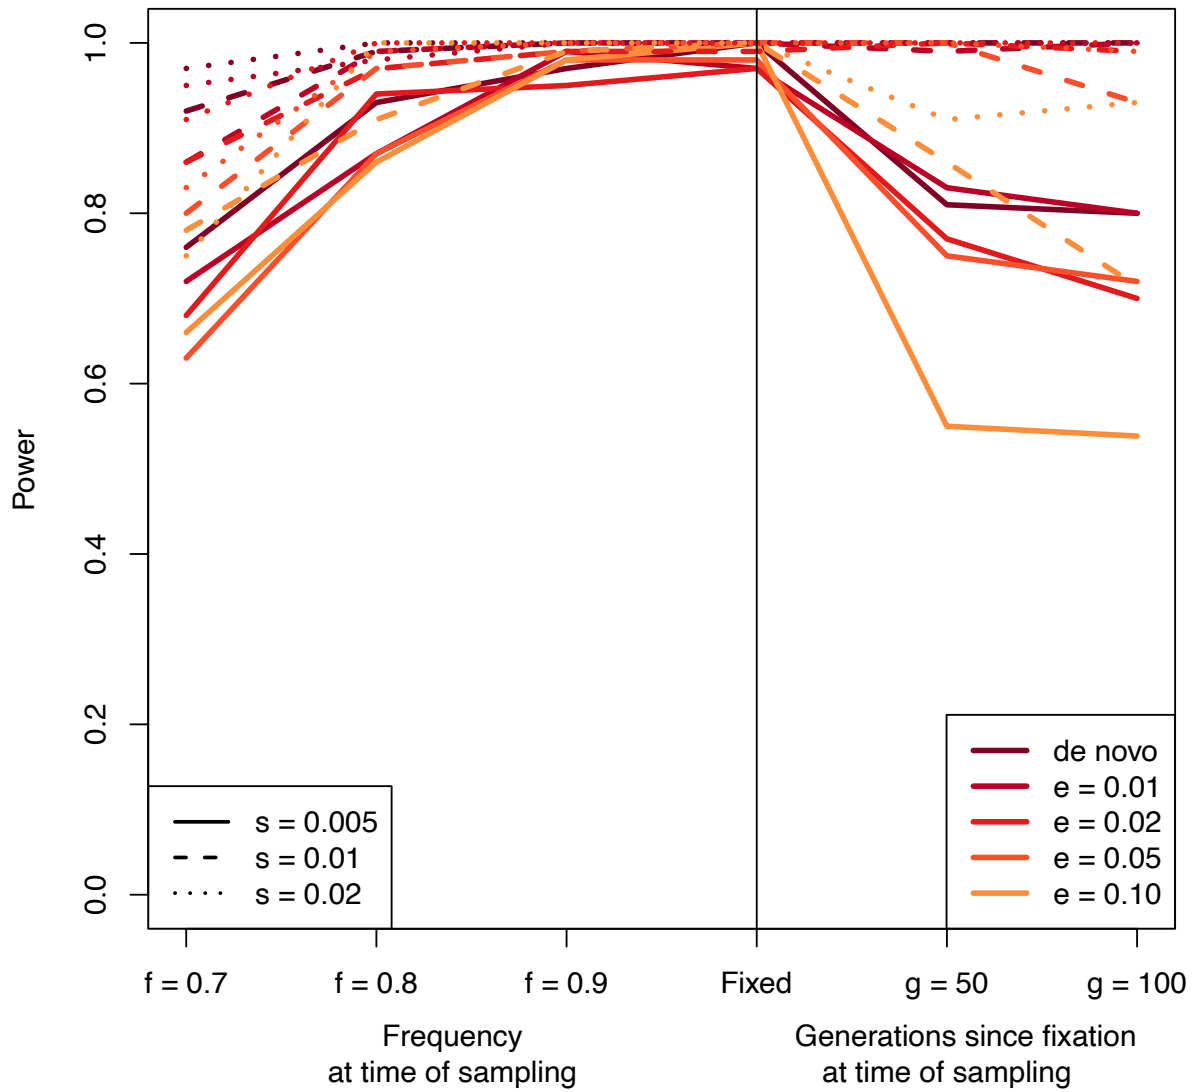

276

277 **Figure S17.** Demo 3 XP-EHH  $t_d = 2000$  power curves.  $s$  is the selection coefficient,  $f$  is the  
278 frequency of the adaptive allele at time of sampling,  $g$  is the number of generations at time of  
279 sampling since fixation,  $e$  is the frequency at which selection began, and  $t_d$  is the time in  
280 generations since the two populations diverged.

XP-EHH;  $t_d = 8000$

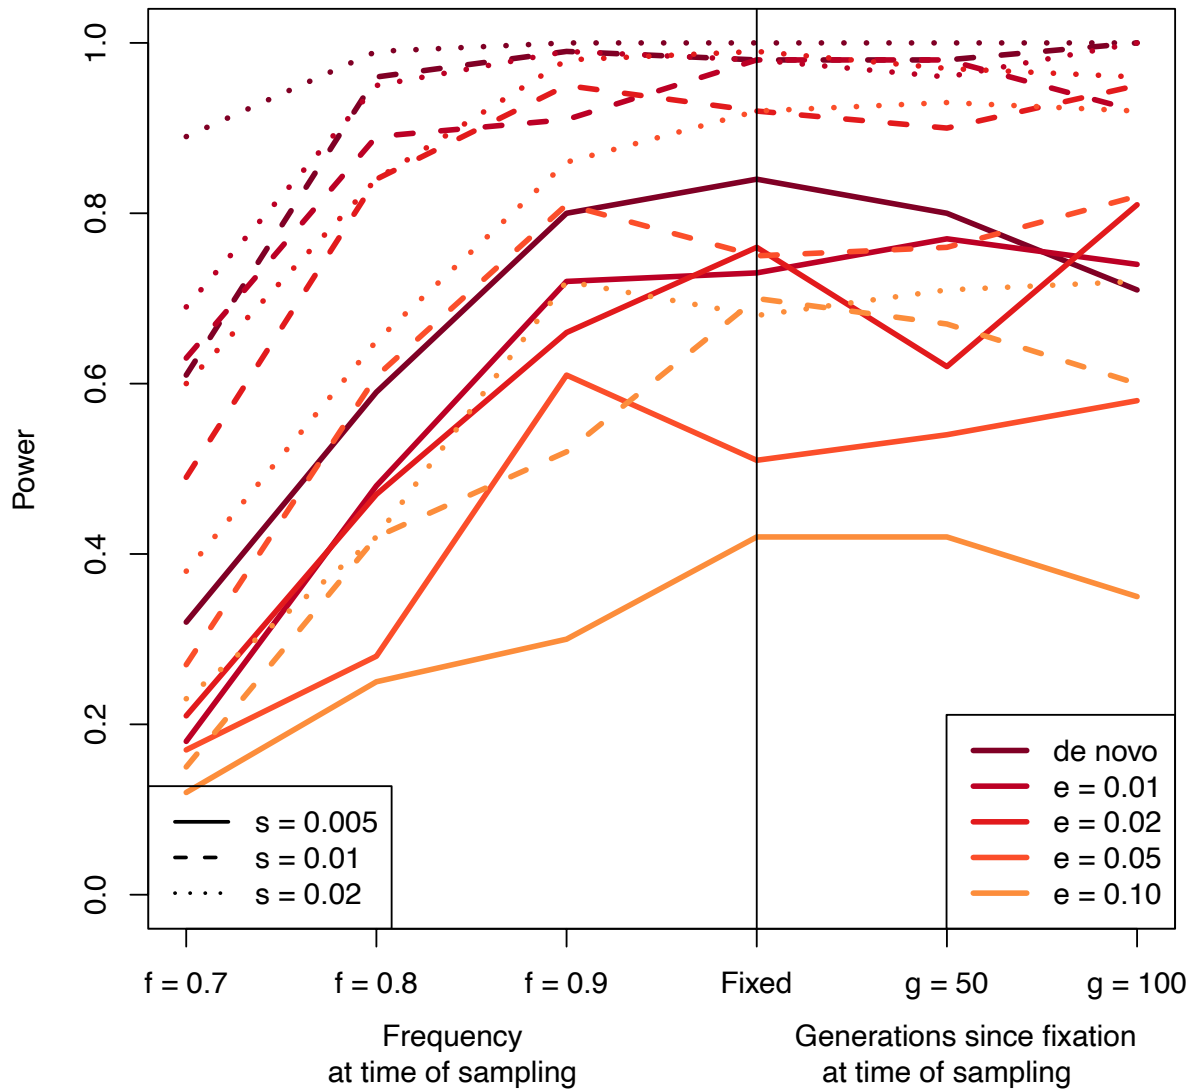

281

282 **Figure S18.** Demo 3 XP-EHH  $t_d = 8000$  power curves.  $s$  is the selection coefficient,  $f$  is the  
283 frequency of the adaptive allele at time of sampling,  $g$  is the number of generations at time of  
284 sampling since fixation,  $e$  is the frequency at which selection began, and  $t_d$  is the time in  
285 generations since the two populations diverged.

XP-nSL;  $t_d = 2000$

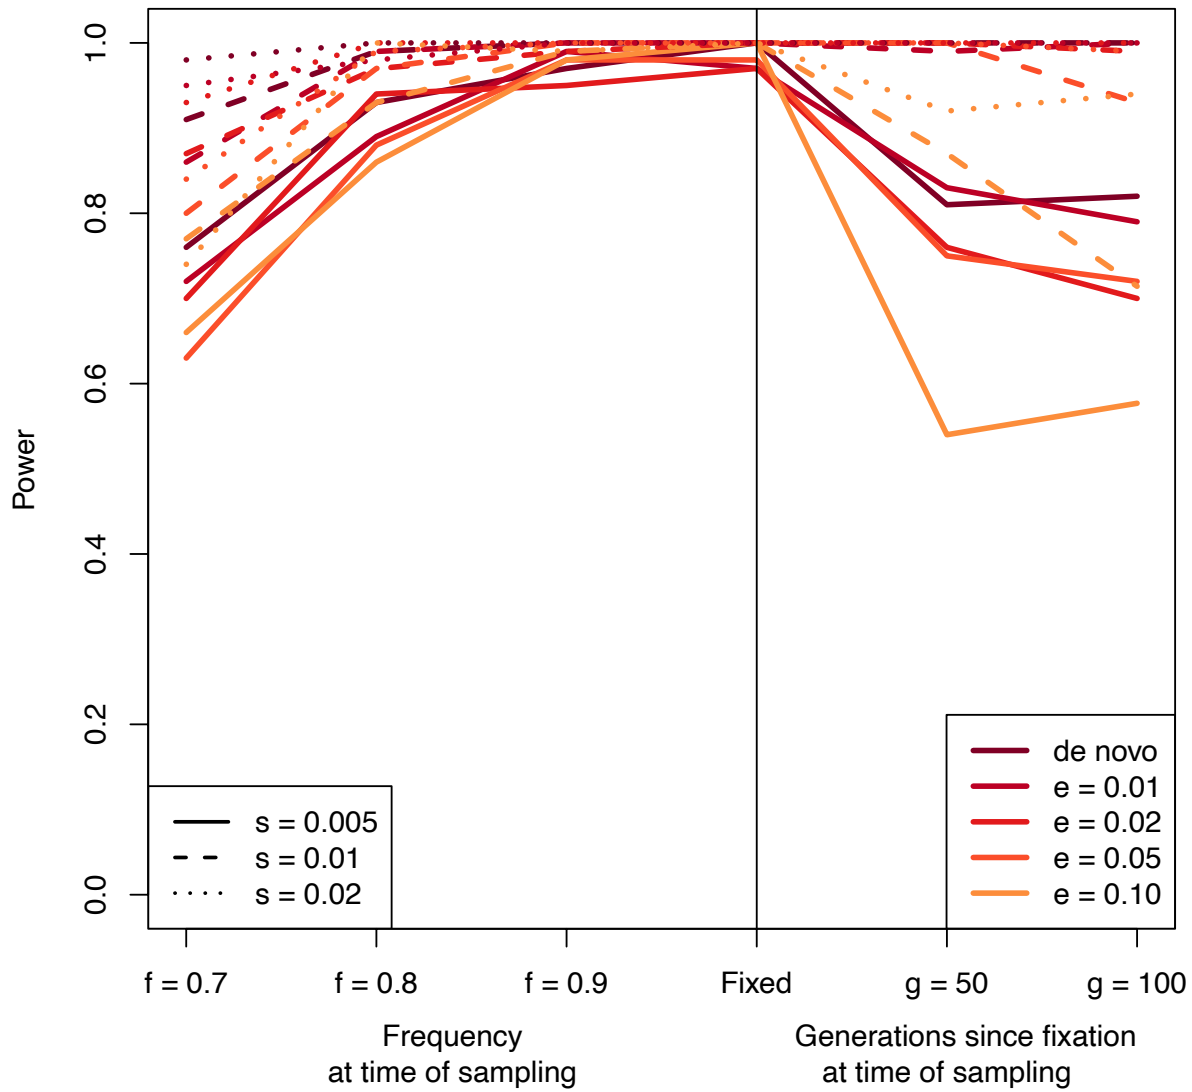

286

287 **Figure S19.** Demo 3 XP-nSL  $t_d = 2000$  power curves.  $s$  is the selection coefficient,  $f$  is the  
288 frequency of the adaptive allele at time of sampling,  $g$  is the number of generations of  
289 sampling since fixation,  $e$  is the frequency at which selection began, and  $t_d$  is the time in  
290 generations since the two populations diverged.

XP-nSL;  $t_d = 8000$

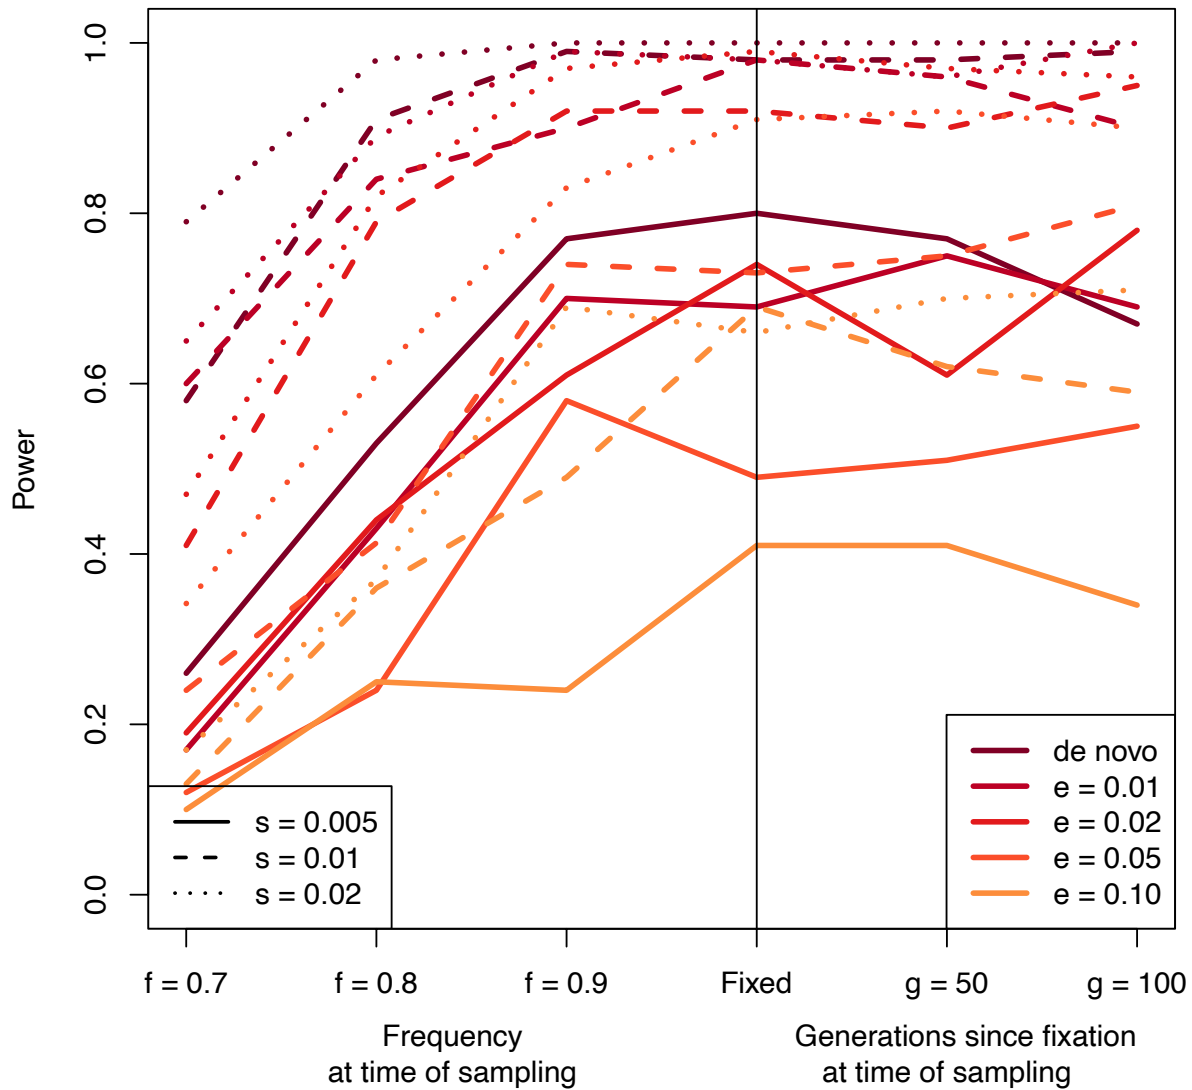

291

292 **Figure S20.** Demo 3 XP-nSL  $t_d = 8000$  power curves.  $s$  is the selection coefficient,  $f$  is the  
293 frequency of the adaptive allele at time of sampling,  $g$  is the number of generations at time of  
294 sampling since fixation,  $e$  is the frequency at which selection began, and  $t_d$  is the time in  
295 generations since the two populations diverged.

iHS;  $t_d = 2000$

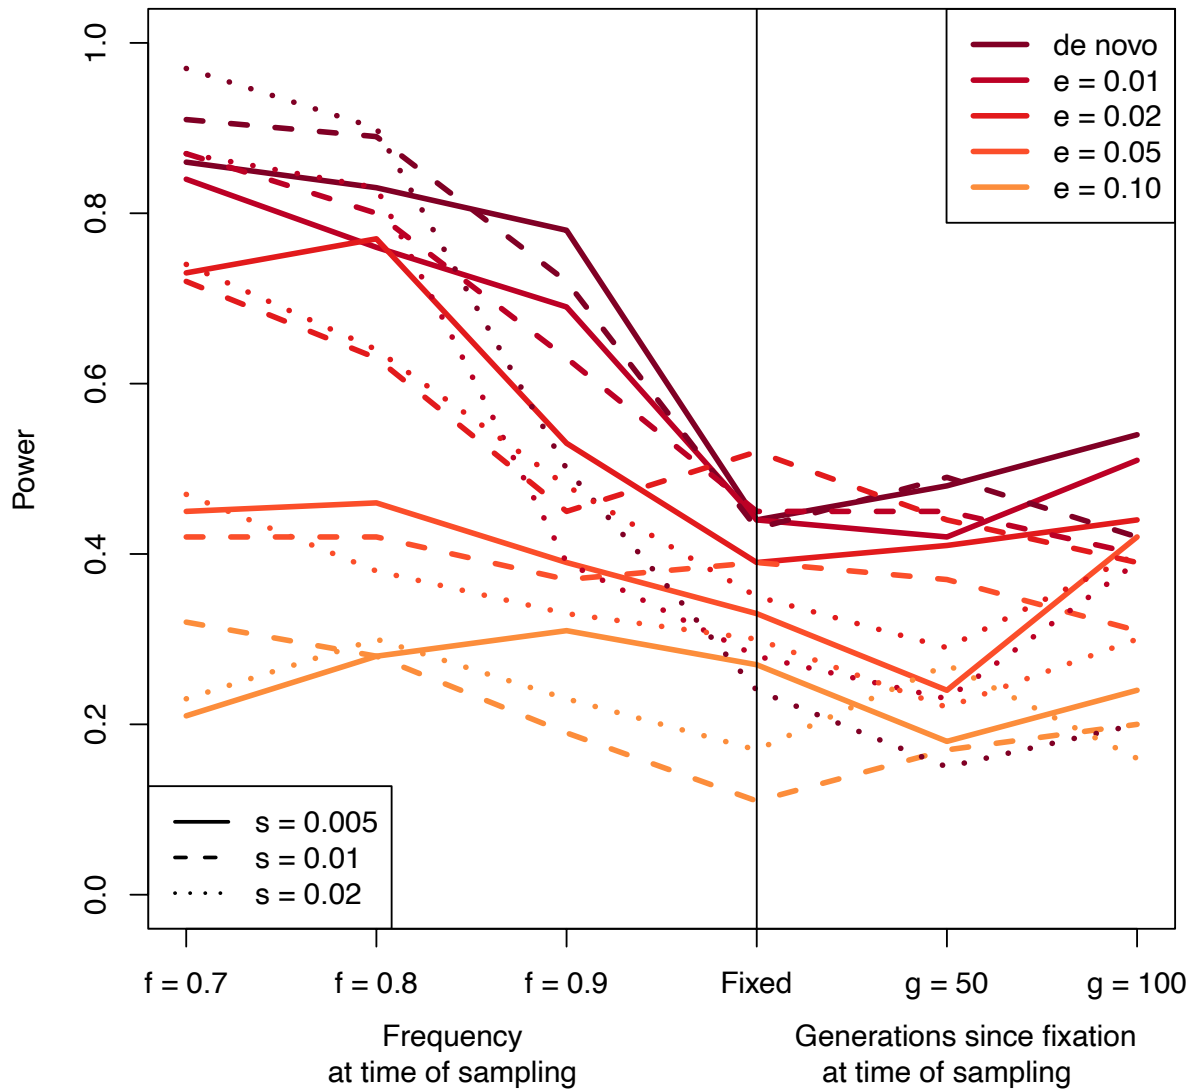

296

297 **Figure S21.** Demo 4 iHS  $t_d = 2000$  power curves.  $s$  is the selection coefficient,  $f$  is the  
298 frequency of the adaptive allele at time of sampling,  $g$  is the number of generations at time of  
299 sampling since fixation,  $e$  is the frequency at which selection began, and  $t_d$  is the time in  
300 generations since the two populations diverged.

iHS;  $t_d = 8000$

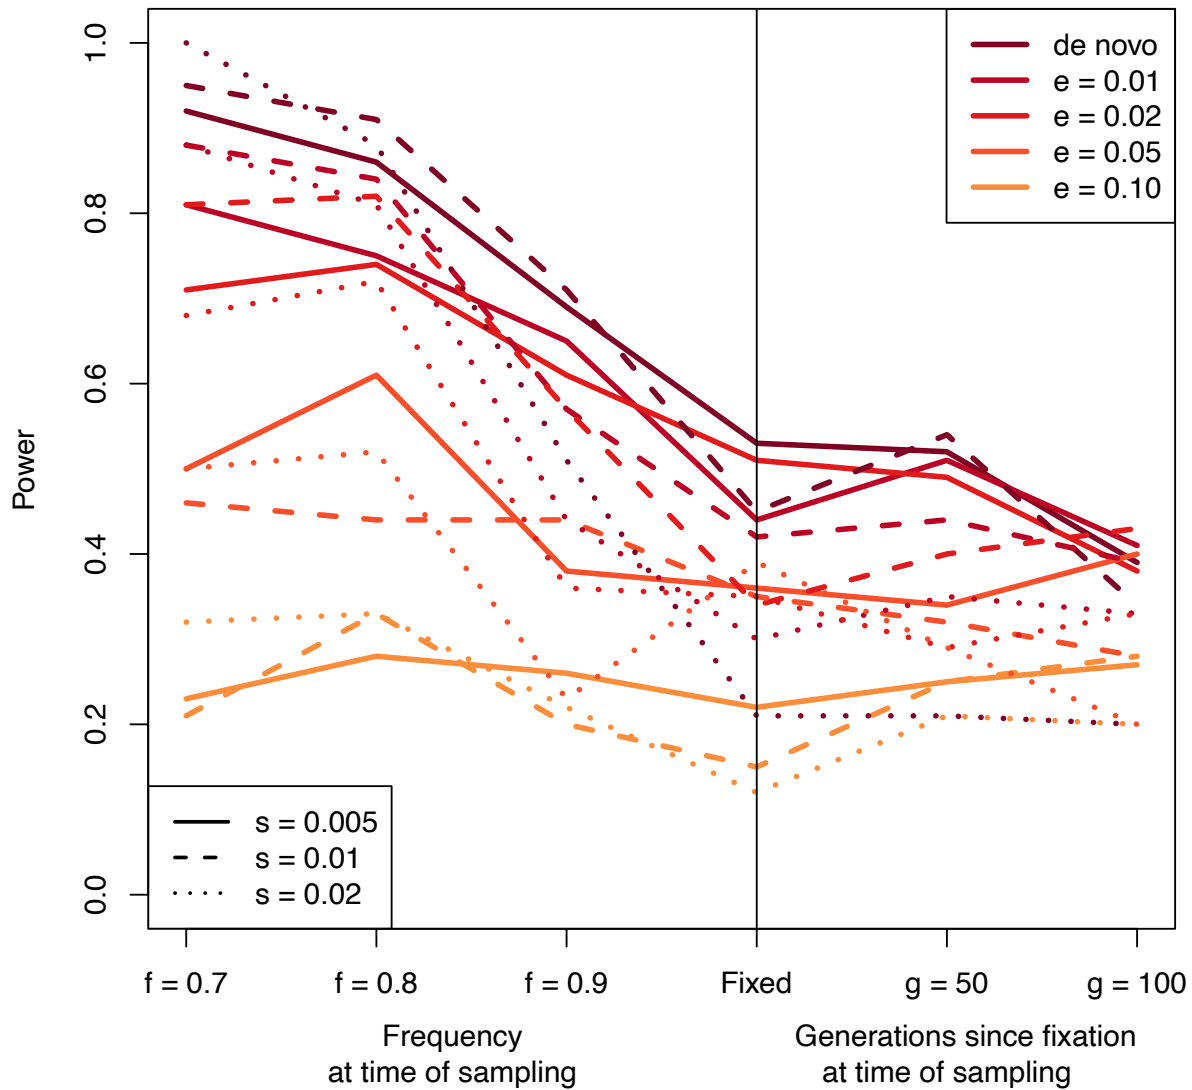

301

302 **Figure S22.** Demo 4 iHS  $t_d = 8000$  power curves.  $s$  is the selection coefficient,  $f$  is the  
303 frequency of the adaptive allele at time of sampling,  $g$  is the number of generations at time of  
304 sampling since fixation,  $e$  is the frequency at which selection began, and  $t_d$  is the time in  
305 generations since the two populations diverged.



nSL;  $t_d = 2000$

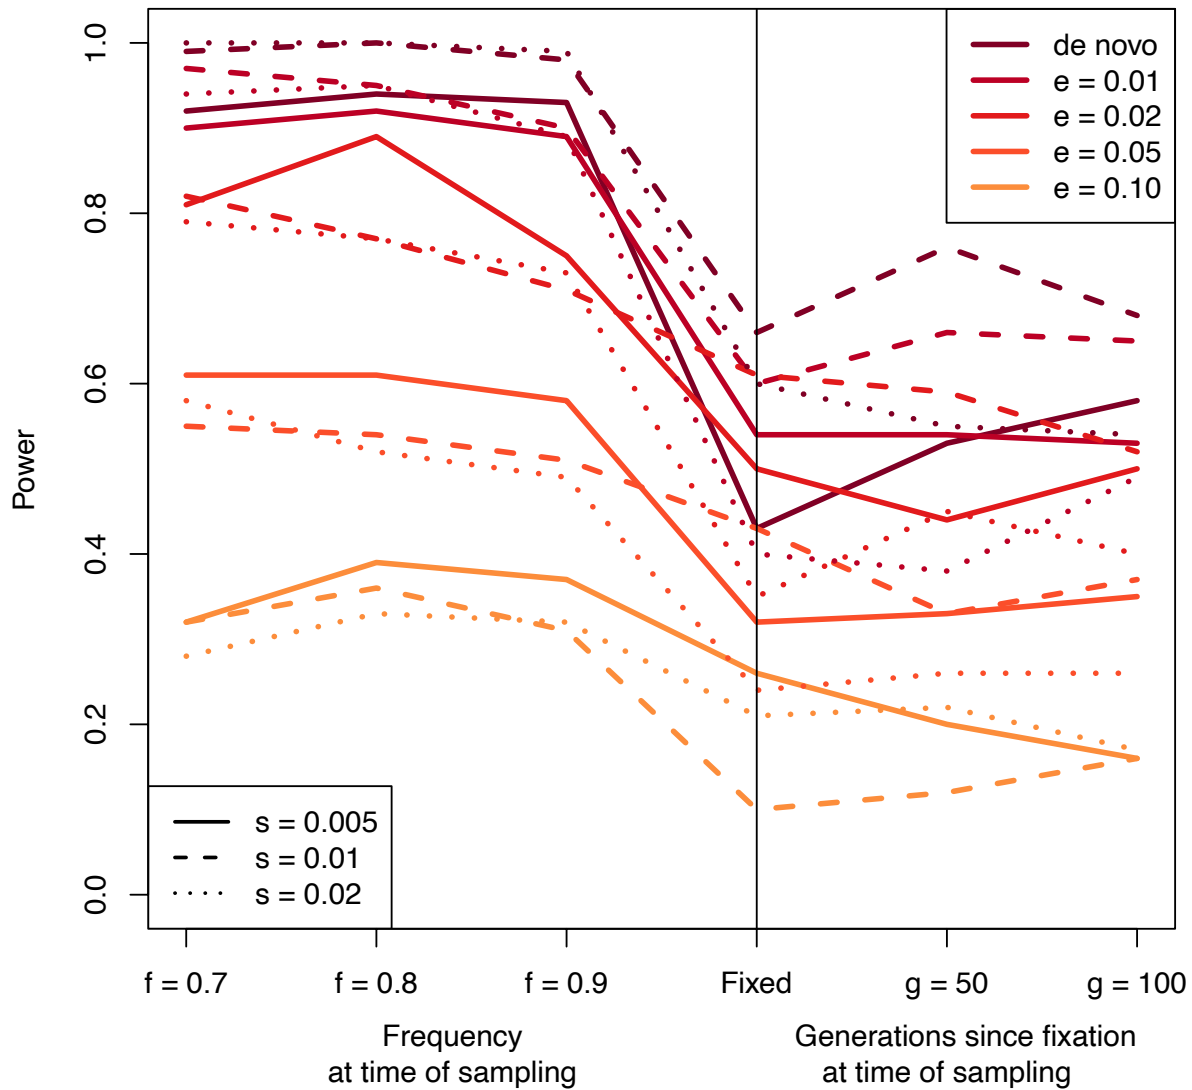

306

307 **Figure S23.** Demo 4 nSL  $t_d = 2000$  power curves.  $s$  is the selection coefficient,  $f$  is the  
308 frequency of the adaptive allele at time of sampling,  $g$  is the number of generations at time of  
309 sampling since fixation,  $e$  is the frequency at which selection began, and  $t_d$  is the time in  
310 generations since the two populations diverged.

nSL;  $t_d = 8000$

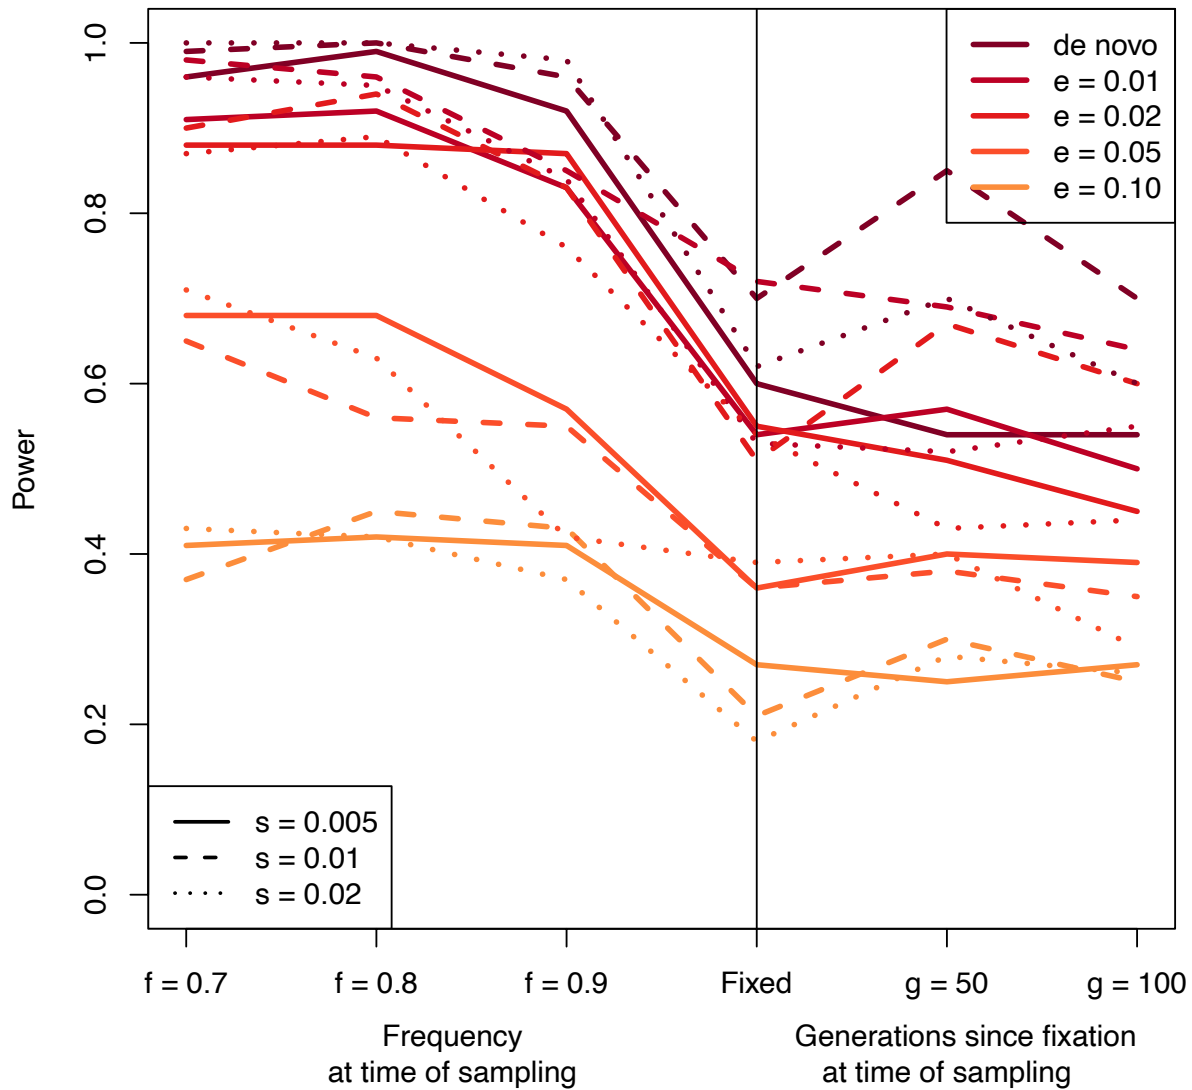

311

312 **Figure S24.** Demo 4 nSL  $t_d = 8000$  power curves.  $s$  is the selection coefficient,  $f$  is the  
313 frequency of the adaptive allele at time of sampling,  $g$  is the number of generations at time of  
314 sampling since fixation,  $e$  is the frequency at which selection began, and  $t_d$  is the time in  
315 generations since the two populations diverged.

XP-EHH;  $t_d = 2000$

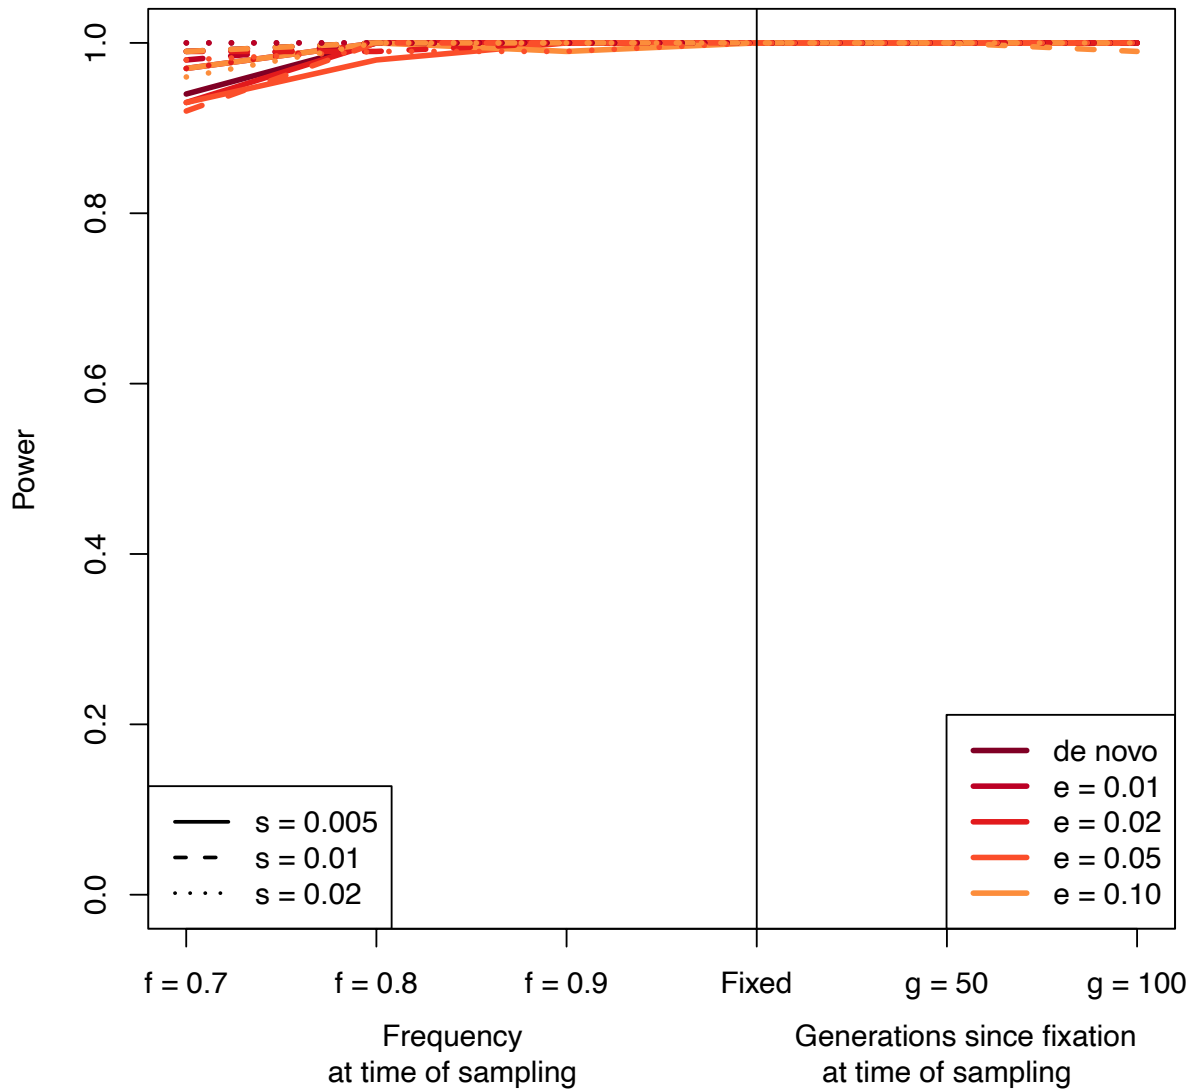

316

317 **Figure S25.** Demo 4 XP-EHH  $t_d = 2000$  power curves.  $s$  is the selection coefficient,  $f$  is the  
318 frequency of the adaptive allele at time of sampling,  $g$  is the number of generations at time of  
319 sampling since fixation,  $e$  is the frequency at which selection began, and  $t_d$  is the time in  
320 generations since the two populations diverged.

XP-EHH;  $t_d = 8000$

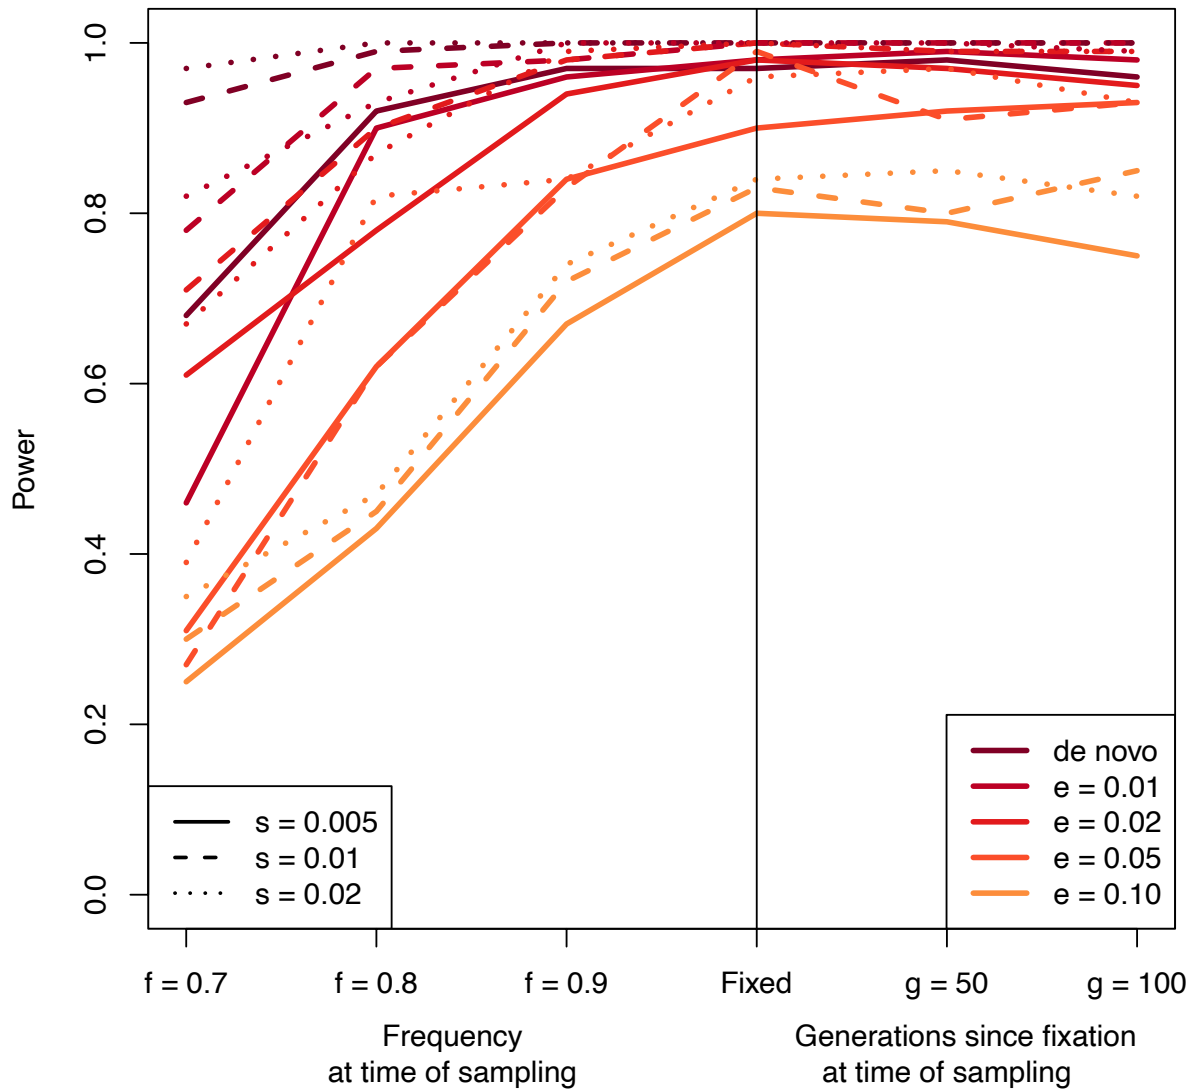

321

322 **Figure S26.** Demo 4 XP-EHH  $t_d = 8000$  power curves.  $s$  is the selection coefficient,  $f$  is the  
323 frequency of the adaptive allele at time of sampling,  $g$  is the number of generations at time of  
324 sampling since fixation,  $e$  is the frequency at which selection began, and  $t_d$  is the time in  
325 generations since the two populations diverged.

XP-nSL;  $t_d = 2000$

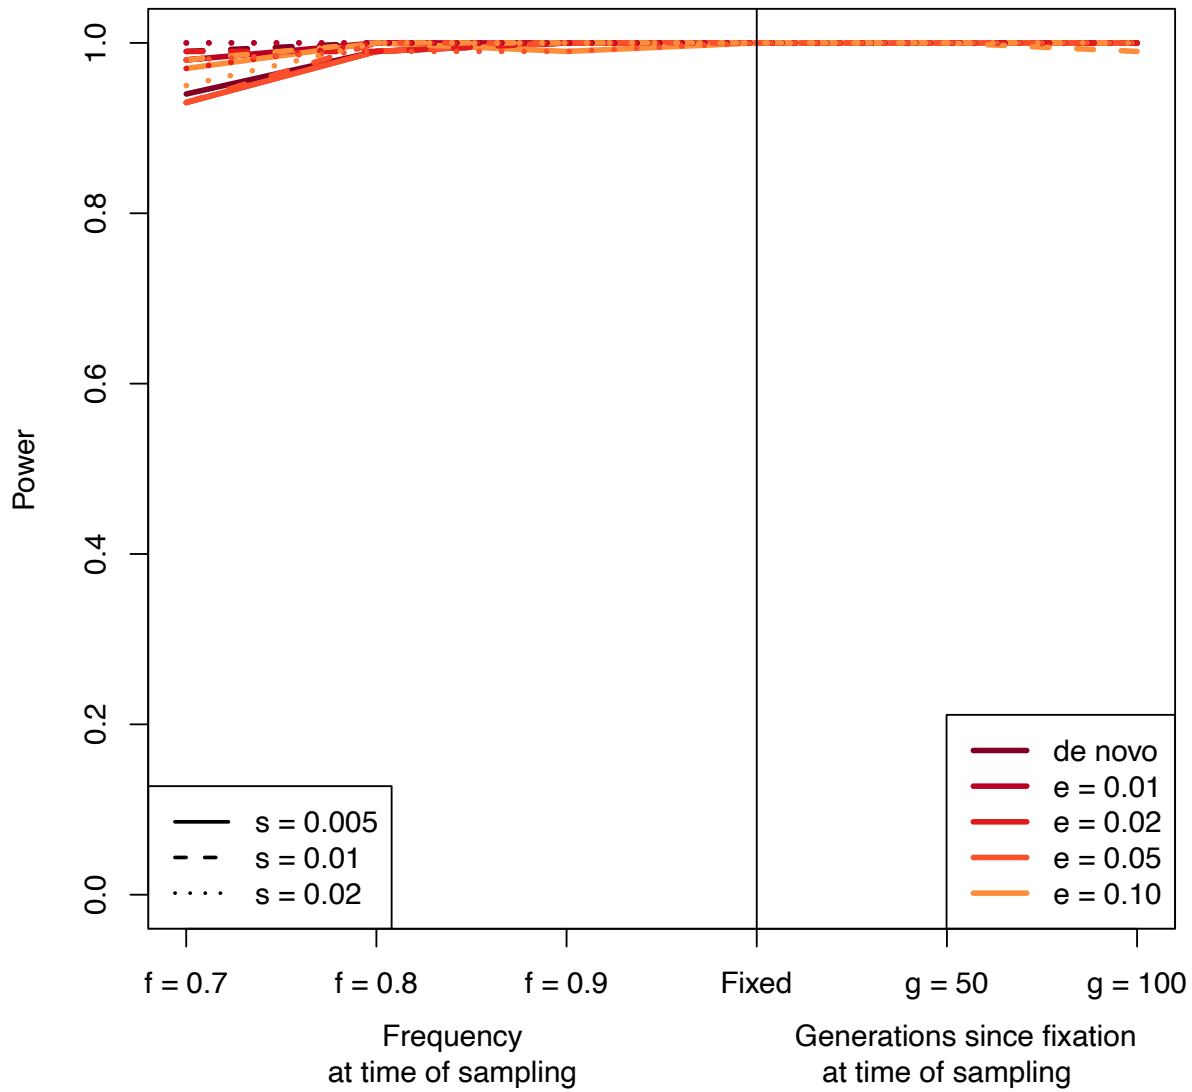

326

327 **Figure S27.** Demo 4 XP-nSL  $t_d = 2000$  power curves.  $s$  is the selection coefficient,  $f$  is the  
328 frequency of the adaptive allele at time of sampling,  $g$  is the number of generations at time of  
329 sampling since fixation,  $e$  is the frequency at which selection began, and  $t_d$  is the time in  
330 generations since the two populations diverged.

XP-nSL;  $t_d = 8000$

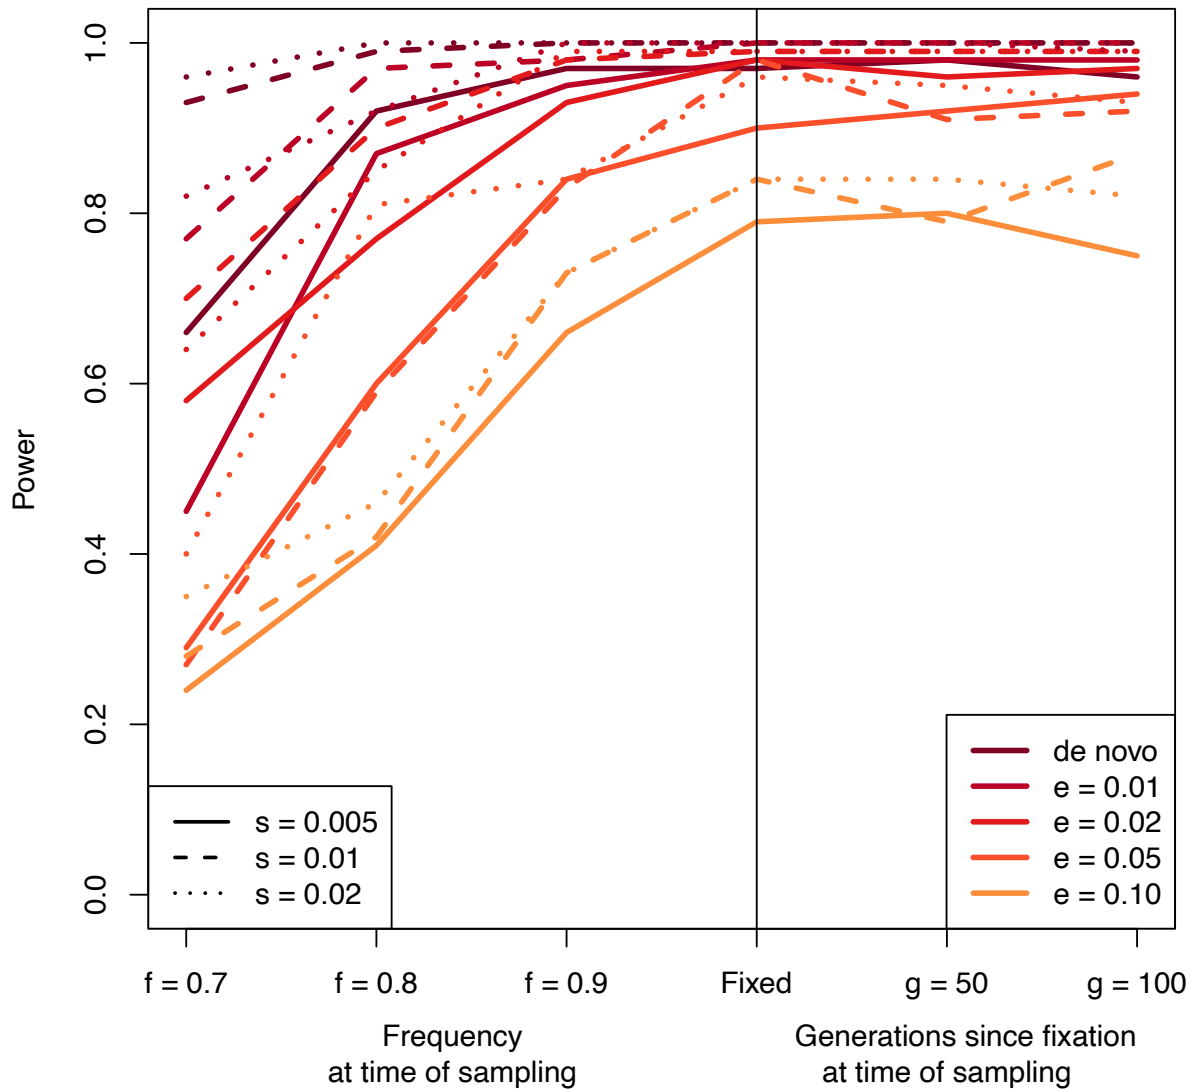

331

332 **Figure S28.** Demo 4 XP-nSL  $t_d = 8000$  power curves.  $s$  is the selection coefficient,  $f$  is the  
333 frequency of the adaptive allele at time of sampling,  $g$  is the number of generations at time of  
334 sampling since fixation,  $e$  is the frequency at which selection began, and  $t_d$  is the time in  
335 generations since the two populations diverged.

XP-EHH;  $t_d = 2000$

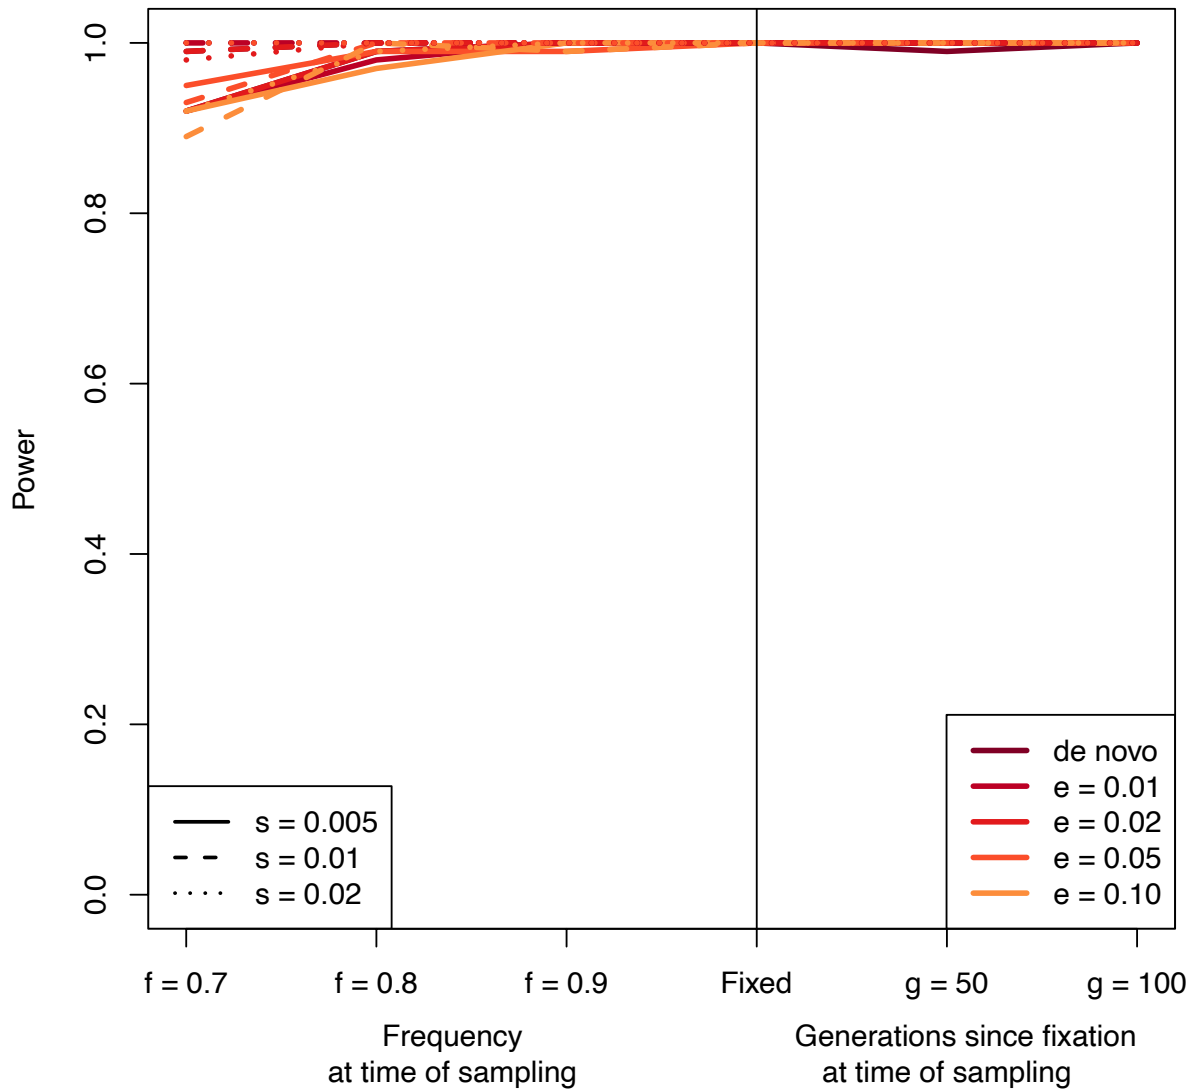

336

337 **Figure S29.** Demo 5 XP-EHH  $t_d = 2000$  power curves.  $s$  is the selection coefficient,  $f$  is the  
338 frequency of the adaptive allele at time of sampling,  $g$  is the number of generations at time of  
339 sampling since fixation,  $e$  is the frequency at which selection began, and  $t_d$  is the time in  
340 generations since the two populations diverged.

XP-EHH;  $t_d = 8000$

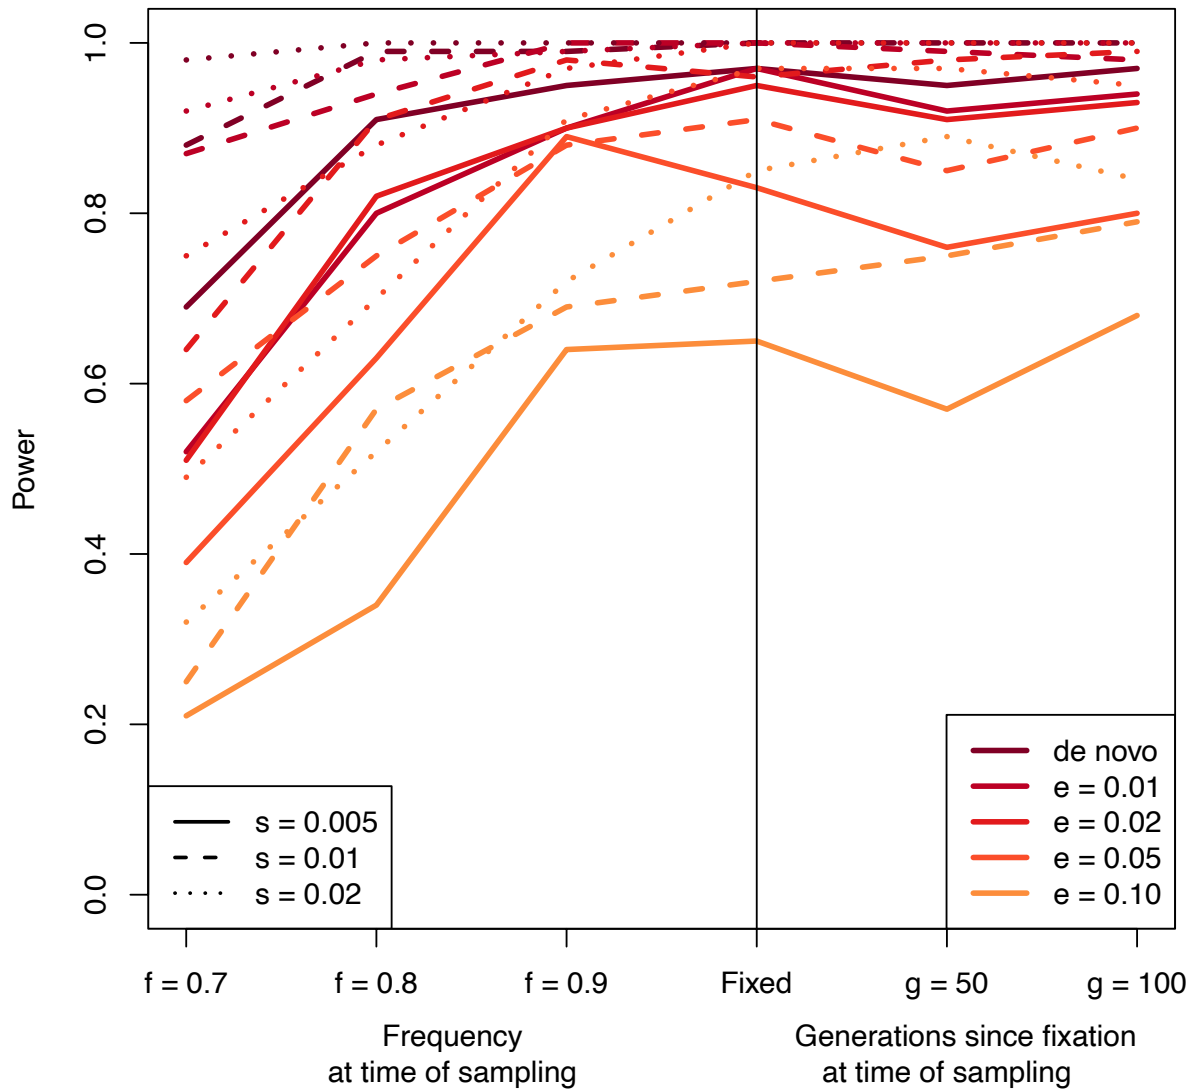

341

342 **Figure S30.** Demo 5 XP-EHH  $t_d = 8000$  power curves.  $s$  is the selection coefficient,  $f$  is the  
343 frequency of the adaptive allele at time of sampling,  $g$  is the number of generations at time of  
344 sampling since fixation,  $e$  is the frequency at which selection began, and  $t_d$  is the time in  
345 generations since the two populations diverged.



XP-nSL;  $t_d = 2000$

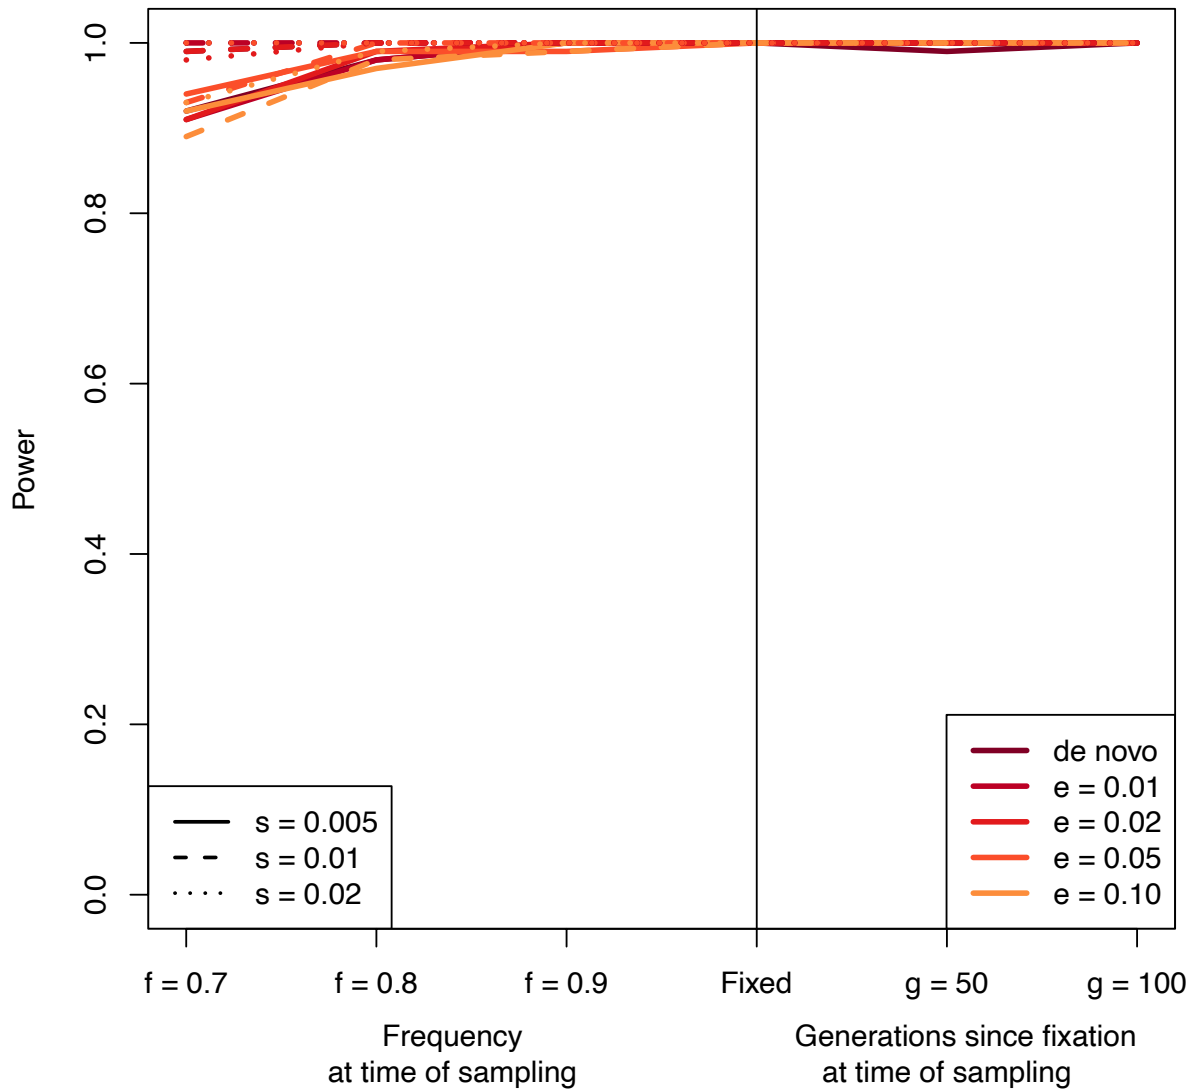

346

347 **Figure S31.** Demo 5 XP-nSL  $t_d = 2000$  power curves.  $s$  is the selection coefficient,  $f$  is the  
348 frequency of the adaptive allele at time of sampling,  $g$  is the number of generations at time of  
349 sampling since fixation,  $e$  is the frequency at which selection began, and  $t_d$  is the time in  
350 generations since the two populations diverged.

XP-nSL;  $t_d = 8000$

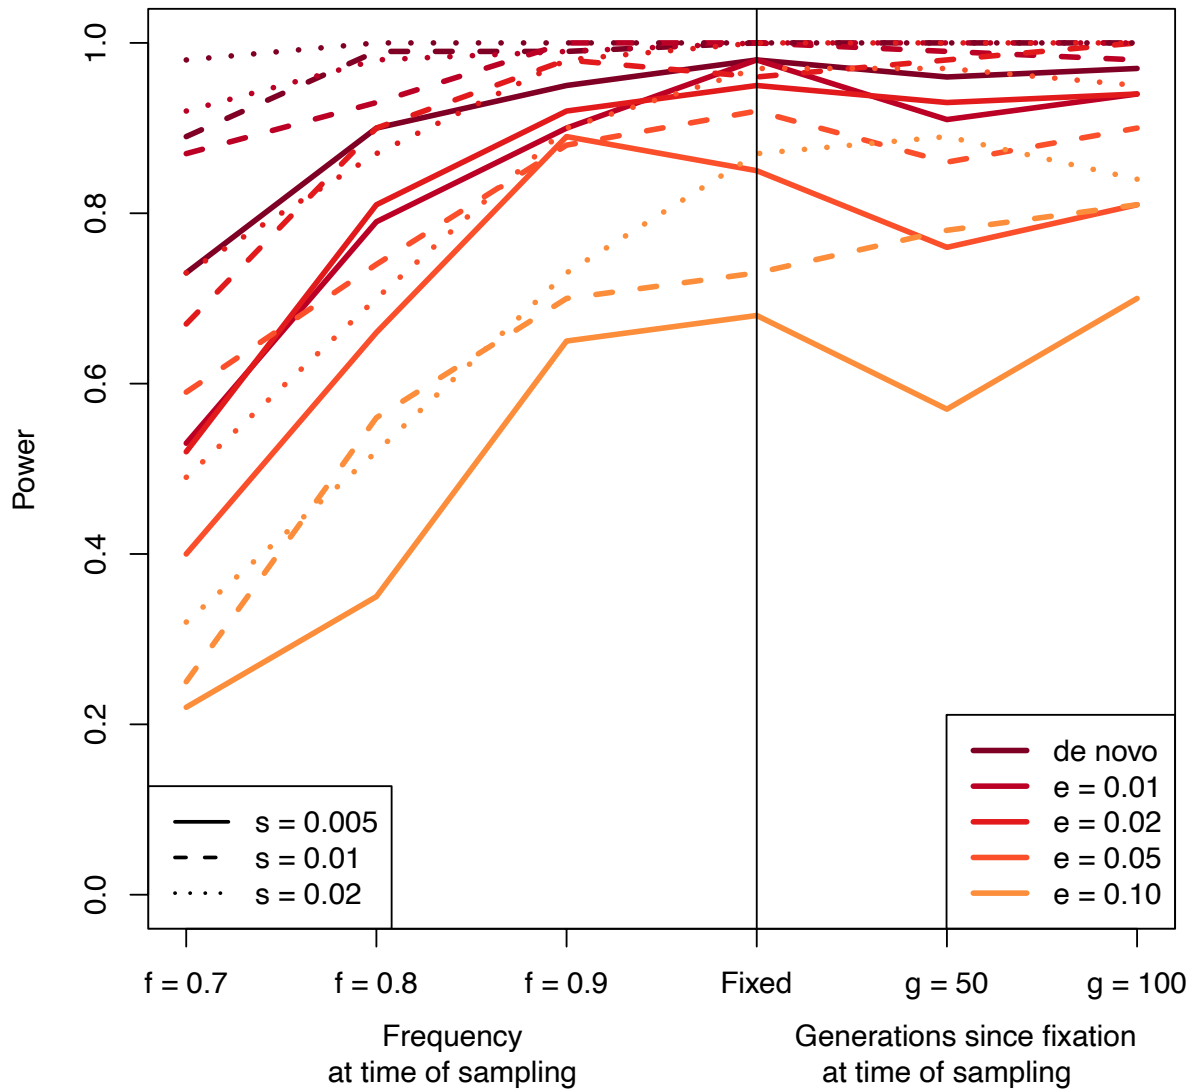

351

352 **Figure S32.** Demo 5 XP-nSL  $t_d = 8000$  power curves.  $s$  is the selection coefficient,  $f$  is the  
353 frequency of the adaptive allele at time of sampling,  $g$  is the number of generations at time of  
354 sampling since fixation,  $e$  is the frequency at which selection began, and  $t_d$  is the time in  
355 generations since the two populations diverged.

356

357

358

359

360

361 **Table 1.** Demographic history parameters for simulations.

|        | $N_A$  | $N_0$ at split | $N_0$ at present    | $N_1$ at split | $N_1$ at present    | $t_d$             |
|--------|--------|----------------|---------------------|----------------|---------------------|-------------------|
| Demo 1 | 10,000 | 10,000         | 10,000              | 10,000         | 10,000              | 2,000/4,000/8,000 |
| Demo 2 | 10,000 | 10,000         | 10,000              | 5,000          | 5,000               | 2,000/4,000/8,000 |
| Demo 3 | 10,000 | 5,000          | 5,000               | 10,000         | 10,000              | 2,000/4,000/8,000 |
| Demo 4 | 10,000 | 10,000         | 50,000 <sup>†</sup> | 10,000         | 10,000              | 2,000/4,000/8,000 |
| Demo 5 | 10,000 | 10,000         | 10,000              | 10,000         | 50,000 <sup>†</sup> | 2,000/4,000/8,000 |

362 <sup>†</sup>The reached via exponential growth starting 2,000 generations ago.

363  
364 **Table S1.** False positive rate computed from neutral simulations for varying  $t_d$  and demographic  
365 history.

|        |        | $t_d = 2000$ | $t_d = 4000$ | $t_d = 8000$ |
|--------|--------|--------------|--------------|--------------|
| iHS    | Demo 1 | 0.013        | 0.1          | 0.009        |
|        | Demo 3 | 0.007        | 0.013        | 0.007        |
|        | Demo 4 | 0.015        | 0.018        | 0.008        |
| nSL    | Demo 1 | 0.01         | 0.015        | 0.008        |
|        | Demo 3 | 0.008        | 0.011        | 0.007        |
|        | Demo 4 | 0.014        | 0.021        | 0.014        |
| XP-EHH | Demo 1 | 0.013        | 0.013        | 0.016        |
|        | Demo 2 | 0.017        | 0.009        | 0.015        |
|        | Demo 3 | 0.01         | 0.011        | 0.012        |
|        | Demo 4 | 0.012        | 0.014        | 0.014        |
|        | Demo 5 | 0.011        | 0.012        | 0.013        |
| XP-nSL | Demo 1 | 0.014        | 0.011        | 0.013        |
|        | Demo 2 | 0.019        | 0.011        | 0.012        |
|        | Demo 3 | 0.011        | 0.011        | 0.012        |
|        | Demo 4 | 0.012        | 0.012        | 0.014        |
|        | Demo 5 | 0.011        | 0.012        | 0.014        |

366  
367

## 368 References

- 369  
370 Colonna V, Ayub Q, Chen Y, Pagani L, Luisi P, Pybus M, Garrison E, Xue Y, Tyler-Smith C,  
371 Genomes Project C, et al. 2014. Human genomic regions with exceptionally high levels  
372 of population differentiation identified from 911 whole-genome sequences. *Genome*  
373 *Biol* 15:R88.
- 374 Crawford NG, Kelly DE, Hansen MEB, Beltrame MH, Fan S, Bowman SL, Jewett E, Ranciaro A,  
375 Thompson S, Lo Y, et al. 2017. Loci associated with skin pigmentation identified in  
376 African populations. *Science* 358.
- 377 DeGiorgio M, Szpiech ZA. 2021. A spatially aware likelihood test to detect sweeps from  
378 haplotype distributions. *bioRxiv:2021.2005.2012.443825*.
- 379 Ferrer-Admetlla A, Liang M, Korneliussen T, Nielsen R. 2014. On detecting incomplete soft  
380 or hard selective sweeps using haplotype structure. *Mol Biol Evol* 31:1275-1291.
- 381 Harris AM, DeGiorgio M. 2020. A likelihood approach for uncovering selective sweep  
382 signatures from haplotype data. *Mol Biol Evol*.

- 383 Harris AM, Garud NR, DeGiorgio M. 2018. Detection and Classification of Hard and Soft  
384 Sweeps from Unphased Genotypes by Multilocus Genotype Identity. *Genetics* 210:1429-  
385 1452.
- 386 Kern AD, Schrider DR. 2016. Discoal: flexible coalescent simulations with selection.  
387 *Bioinformatics* 32:3839-3841.
- 388 Lu K, Wei L, Li X, Wang Y, Wu J, Liu M, Zhang C, Chen Z, Xiao Z, Jian H, et al. 2019. Whole-  
389 genome resequencing reveals *Brassica napus* origin and genetic loci involved in its  
390 improvement. *Nat Commun* 10:1154.
- 391 Meier JI, Marques DA, Wagner CE, Excoffier L, Seehausen O. 2018. Genomics of Parallel  
392 Ecological Speciation in Lake Victoria Cichlids. *Mol Biol Evol* 35:1489-1506.
- 393 Nedelec Y, Sanz J, Baharian G, Szpiech ZA, Pacis A, Dumaine A, Grenier JC, Freiman A, Sams  
394 AJ, Hebert S, et al. 2016. Genetic Ancestry and Natural Selection Drive Population  
395 Differences in Immune Responses to Pathogens. *Cell* 167:657-669 e621.
- 396 Sabeti PC, Varilly P, Fry B, Lohmueller J, Hostetter E, Cotsapas C, Xie X, Byrne EH, McCarroll  
397 SA, Gaudet R, et al. 2007. Genome-wide detection and characterization of positive  
398 selection in human populations. *Nature* 449:913-918.
- 399 Salmon P, Jacobs A, Ahren D, Biard C, Dingemans NJ, Dominoni DM, Helm B, Lundberg M,  
400 Senar JC, Sprau P, et al. 2021. Continent-wide genomic signatures of adaptation to  
401 urbanisation in a songbird across Europe. *Nat Commun* 12:2983.
- 402 Szpiech ZA, Hernandez RD. 2014. selscan: an efficient multithreaded program to perform  
403 EHH-based scans for positive selection. *Mol Biol Evol* 31:2824-2827.
- 404 Szpiech ZA, Novak TE, Bailey NP, Stevison LS. 2021. Application of a novel haplotype-based  
405 scan for local adaptation to study high-altitude adaptation in rhesus macaques. *Evol*  
406 *Lett* 5:408-421.
- 407 Voight BF, Kudaravalli S, Wen X, Pritchard JK. 2006. A map of recent positive selection in  
408 the human genome. *Plos Biology* 4:e72.
- 409 Zhang SJ, Wang GD, Ma P, Zhang LL, Yin TT, Liu YH, Otecko NO, Wang M, Ma YP, Wang L, et  
410 al. 2020. Genomic regions under selection in the feralization of the dingoes. *Nat*  
411 *Commun* 11:671.
- 412 Zoledziowska M, Sidore C, Chiang CWK, Sanna S, Mulas A, Steri M, Busonero F, Marcus JH,  
413 Marongiu M, Maschio A, et al. 2015. Height-reducing variants and selection for short  
414 stature in Sardinia. *Nat Genet* 47:1352-1356.
- 415
