# Supplementary material for: selscan 2.0: scanning for sweeps in unphased data
Source: bioRxiv preprint, doi:10.1101/2021.10.22.465497, version 3 (2023-12-29)
Supplement: Supplemental Information [file 465497_file02.pdf]

**selscan 2.0: scanning for sweeps in unphased data**

**Table S1.** Demographic history parameters for simulations.  $N_A$  represents the ancestral effective population size.  $N_0$  represents the effective population size of the population experiencing the sweep.  $N_0$  represents the effective population size of the non-sweep population.  $t_d$  represents the split time between the two populations.

|        | $N_A$  | $N_0$ at split | $N_0$ at present    | $N_1$ at split | $N_1$ at present    | $t_d$             |
|--------|--------|----------------|---------------------|----------------|---------------------|-------------------|
| Demo 1 | 10,000 | 10,000         | 10,000              | 10,000         | 10,000              | 2,000/4,000/8,000 |
| Demo 2 | 10,000 | 10,000         | 10,000              | 5,000          | 5,000               | 2,000/4,000/8,000 |
| Demo 3 | 10,000 | 5,000          | 5,000               | 10,000         | 10,000              | 2,000/4,000/8,000 |
| Demo 4 | 10,000 | 10,000         | 50,000 <sup>†</sup> | 10,000         | 10,000              | 2,000/4,000/8,000 |
| Demo 5 | 10,000 | 10,000         | 10,000              | 10,000         | 50,000 <sup>†</sup> | 2,000/4,000/8,000 |

<sup>†</sup>The reached via exponential growth starting 2,000 generations ago.

**Table S2.** False positive rate computed from neutral simulations for varying  $t_d$  and demographic history with  $n = 100$  diploid samples (from each population for XP-EHH and XP-nSL).

|        |        | $t_d = 2000$ | $t_d = 4000$ | $t_d = 8000$ |
|--------|--------|--------------|--------------|--------------|
| iHS    | Demo 1 | 0.013        | 0.1          | 0.009        |
|        | Demo 3 | 0.007        | 0.013        | 0.007        |
|        | Demo 4 | 0.015        | 0.018        | 0.008        |
| nSL    | Demo 1 | 0.01         | 0.015        | 0.008        |
|        | Demo 3 | 0.008        | 0.011        | 0.007        |
|        | Demo 4 | 0.014        | 0.021        | 0.014        |
| XP-EHH | Demo 1 | 0.013        | 0.013        | 0.016        |
|        | Demo 2 | 0.017        | 0.009        | 0.015        |
|        | Demo 3 | 0.01         | 0.011        | 0.012        |
|        | Demo 4 | 0.012        | 0.014        | 0.014        |
|        | Demo 5 | 0.011        | 0.012        | 0.013        |
| XP-nSL | Demo 1 | 0.014        | 0.011        | 0.013        |
|        | Demo 2 | 0.019        | 0.011        | 0.012        |
|        | Demo 3 | 0.011        | 0.011        | 0.012        |
|        | Demo 4 | 0.012        | 0.012        | 0.014        |
|        | Demo 5 | 0.011        | 0.012        | 0.014        |

**Table S3.** False positive rate computed from neutral simulations for varying  $t_d$  and demographic history with  $n = 50$  diploid samples (from each population for XP-EHH and XP-nSL).

|        |        | $t_d = 2000$ | $t_d = 4000$ | $t_d = 8000$ |
|--------|--------|--------------|--------------|--------------|
| iHS    | Demo 1 | 0.012        | 0.007        | 0.01         |
|        | Demo 3 | 0.015        | 0.009        | 0.009        |
|        | Demo 4 | 0.01         | 0.005        | 0.014        |
| nSL    | Demo 1 | 0.014        | 0.012        | 0.01         |
|        | Demo 3 | 0.01         | 0.012        | 0.011        |
|        | Demo 4 | 0.007        | 0.013        | 0.013        |
| XP-EHH | Demo 1 | 0.015        | 0.01         | 0.015        |
|        | Demo 2 | 0.018        | 0.009        | 0.013        |
|        | Demo 3 | 0.009        | 0.014        | 0.013        |
|        | Demo 4 | 0.011        | 0.011        | 0.015        |
|        | Demo 5 | 0.012        | 0.016        | 0.02         |
| XP-nSL | Demo 1 | 0.014        | 0.01         | 0.012        |
|        | Demo 2 | 0.018        | 0.011        | 0.013        |
|        | Demo 3 | 0.009        | 0.014        | 0.014        |
|        | Demo 4 | 0.011        | 0.013        | 0.014        |
|        | Demo 5 | 0.012        | 0.015        | 0.022        |

**Table S4.** False positive rate computed from neutral simulations for varying  $t_d$  and demographic history with  $n = 20$  diploid samples (from each population for XP-EHH and XP-nSL).

|        |        | $t_d = 2000$ | $t_d = 4000$ | $t_d = 8000$ |
|--------|--------|--------------|--------------|--------------|
| iHS    | Demo 1 | 0.001        | 0.003        | 0.002        |
|        | Demo 3 | 0.004        | 0.002        | 0.003        |
|        | Demo 4 | 0.002        | 0.0          | 0.003        |
| nSL    | Demo 1 | 0.001        | 0.002        | 0.0          |
|        | Demo 3 | 0.002        | 0.003        | 0.002        |
|        | Demo 4 | 0.0          | 0.0          | 0.002        |
| XP-EHH | Demo 1 | 0.019        | 0.012        | 0.015        |
|        | Demo 2 | 0.017        | 0.006        | 0.012        |
|        | Demo 3 | 0.011        | 0.013        | 0.013        |
|        | Demo 4 | 0.008        | 0.014        | 0.013        |
|        | Demo 5 | 0.008        | 0.013        | 0.017        |
| XP-nSL | Demo 1 | 0.018        | 0.014        | 0.014        |
|        | Demo 2 | 0.016        | 0.011        | 0.011        |
|        | Demo 3 | 0.01         | 0.013        | 0.014        |
|        | Demo 4 | 0.009        | 0.013        | 0.013        |
|        | Demo 5 | 0.009        | 0.012        | 0.02         |

**Table S5.** False positive rate computed from neutral simulations for varying  $t_d$  and demographic history with  $n = 10$  diploid samples (from each population for XP-EHH and XP-nSL).

|        |        | $t_d = 2000$ | $t_d = 4000$ | $t_d = 8000$ |
|--------|--------|--------------|--------------|--------------|
| iHS    | Demo 1 | 0.0          | 0.0          | 0.0          |
|        | Demo 3 | 0.0          | 0.0          | 0.0          |
|        | Demo 4 | 0.0          | 0.0          | 0.0          |
| nSL    | Demo 1 | 0.0          | 0.0          | 0.0          |
|        | Demo 3 | 0.0          | 0.0          | 0.0          |
|        | Demo 4 | 0.0          | 0.0          | 0.0          |
| XP-EHH | Demo 1 | 0.014        | 0.013        | 0.014        |
|        | Demo 2 | 0.01         | 0.008        | 0.016        |
|        | Demo 3 | 0.01         | 0.012        | 0.015        |
|        | Demo 4 | 0.01         | 0.014        | 0.012        |
|        | Demo 5 | 0.008        | 0.019        | 0.012        |
| XP-nSL | Demo 1 | 0.012        | 0.013        | 0.016        |
|        | Demo 2 | 0.011        | 0.006        | 0.013        |
|        | Demo 3 | 0.01         | 0.013        | 0.015        |
|        | Demo 4 | 0.01         | 0.014        | 0.012        |
|        | Demo 5 | 0.009        | 0.02         | 0.01         |

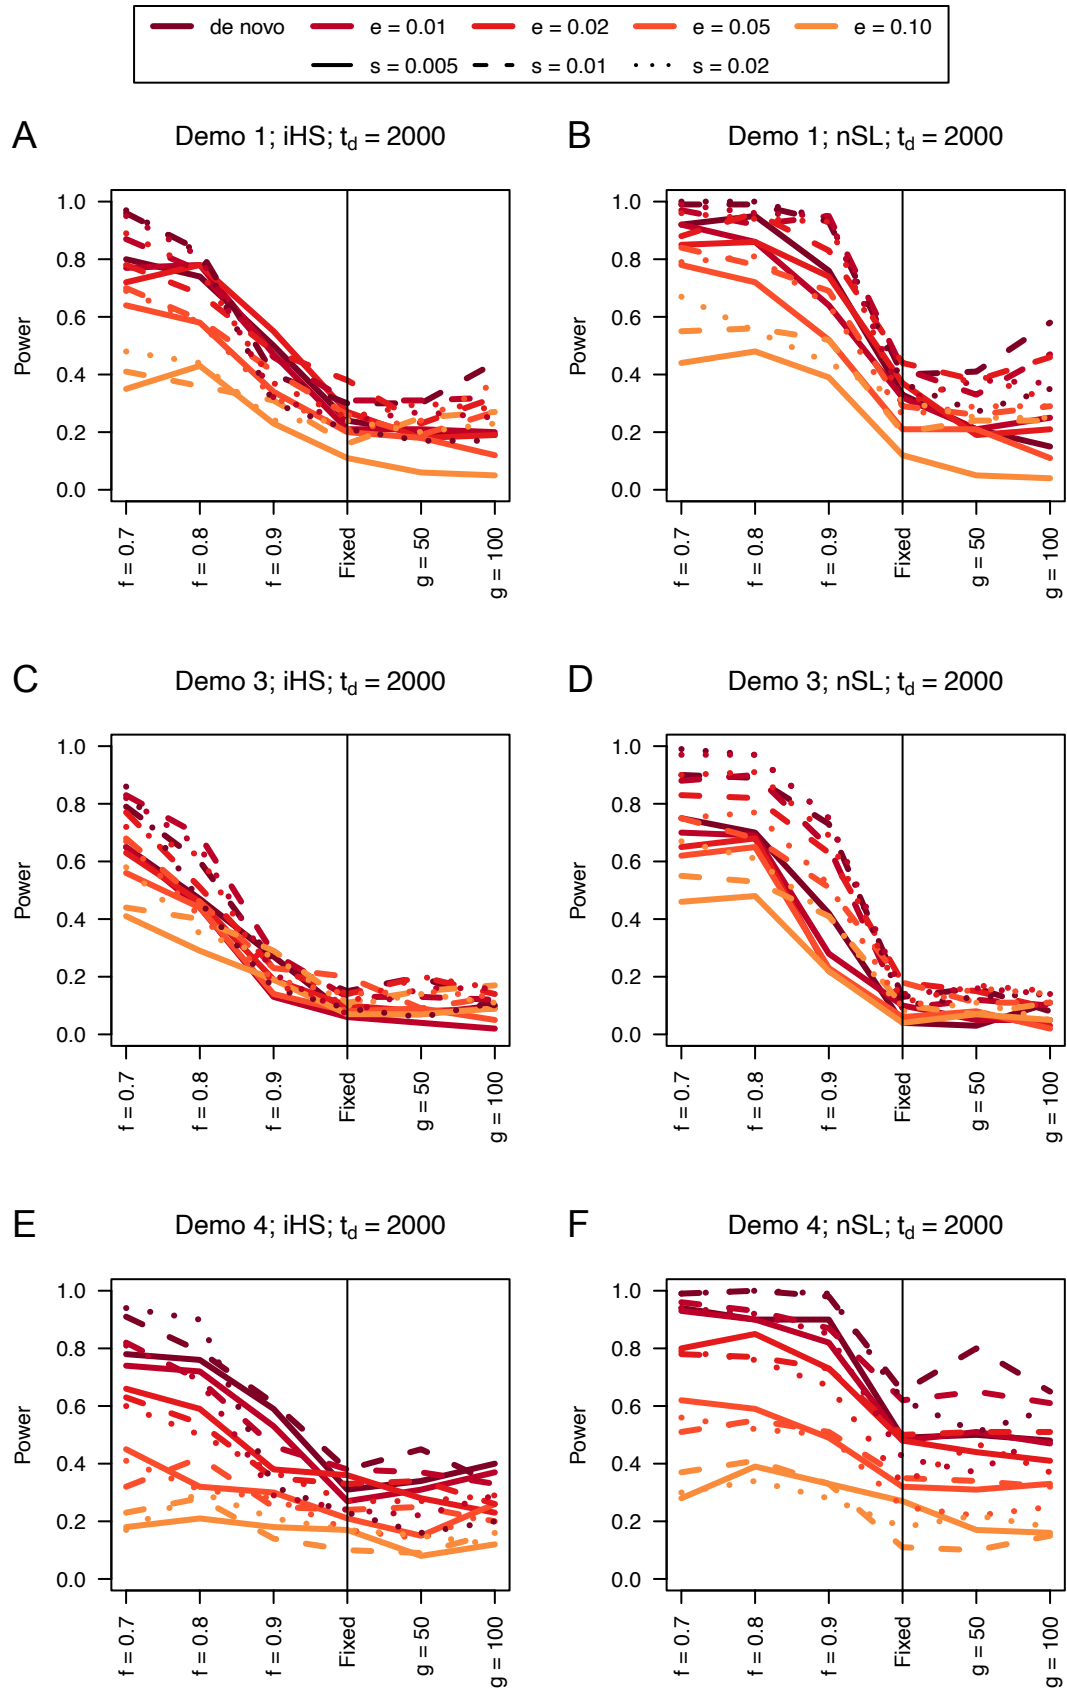

**Figure S1.** Power curves for unphased implementations of iHS (A, C, and E) and nSL (B, D, and F) under demographic histories Demo 1 (A and B), Demo 3 (C and D), and Demo 4 (E and F) with  $n = 100$  diploid samples.  $s$  is the selection coefficient,  $f$  is the frequency of the adaptive allele at time of sampling,  $g$  is the number of generations at time of sampling since fixation,  $e$  is the frequency at which selection began, and  $t_d = 2000$  is the time in generations since the two populations diverged.

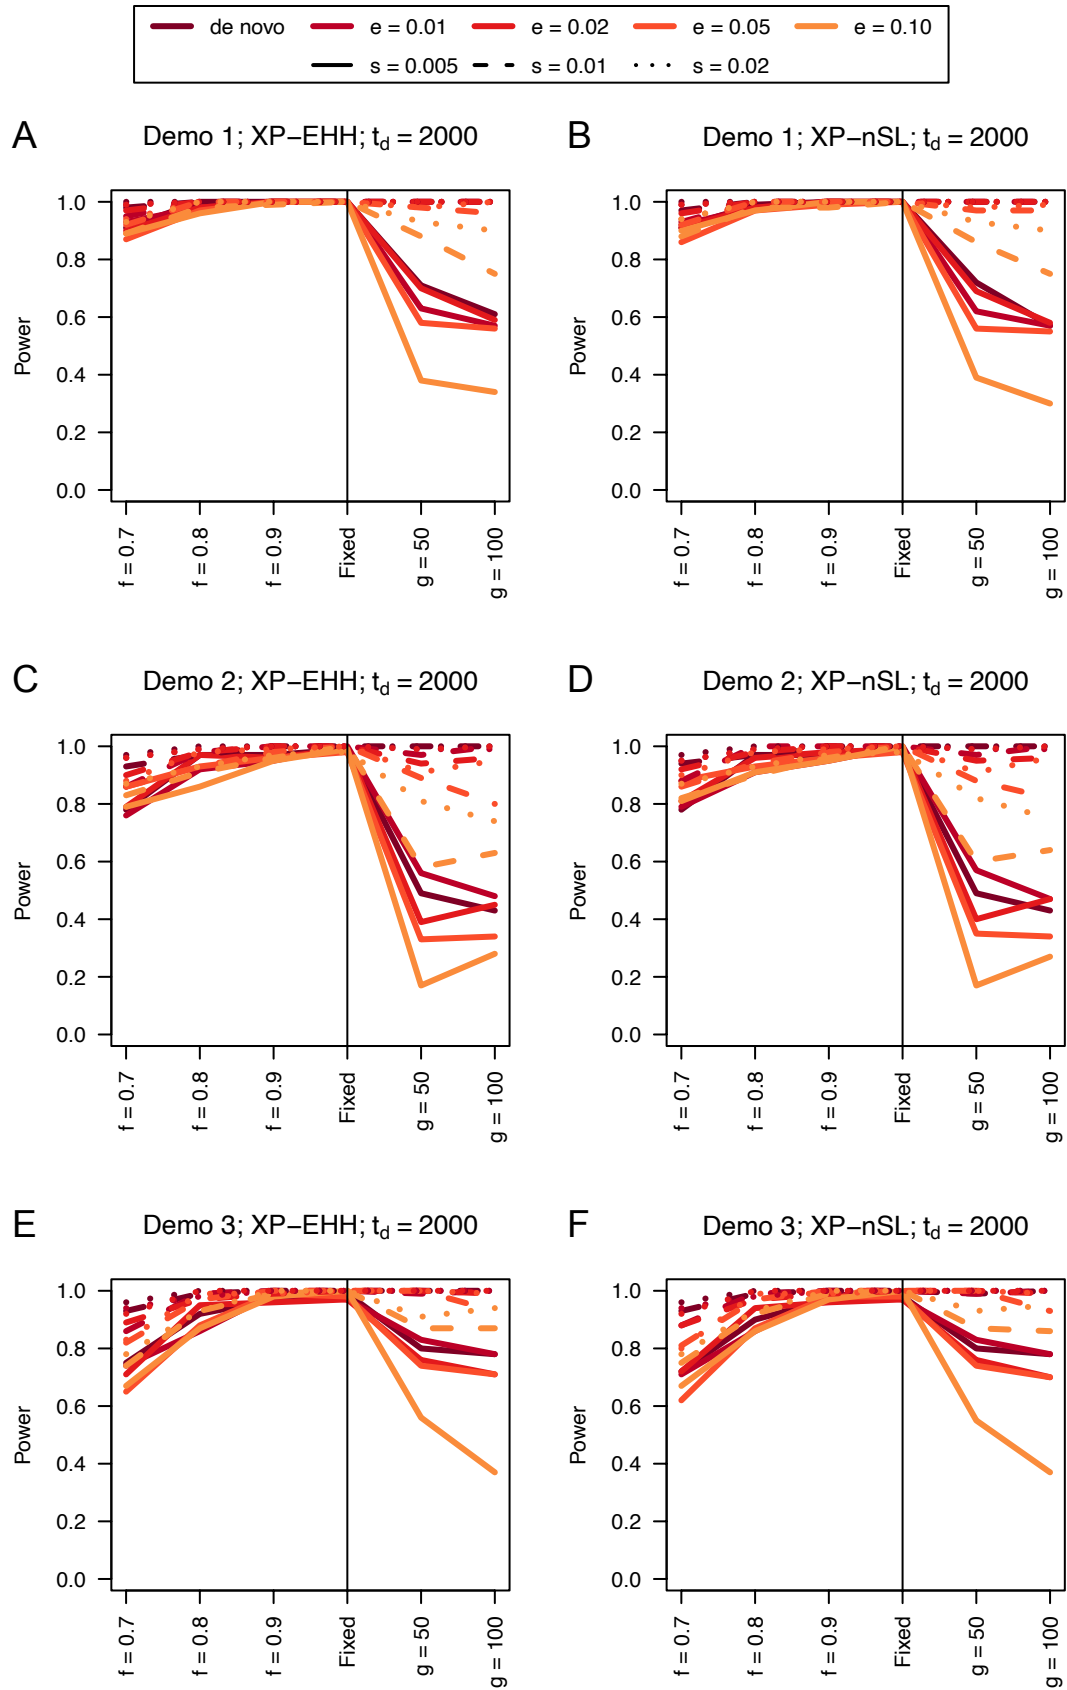

**Figure S2.** Power curves for unphased implementations of XP-EHH (A, C, and E) and XP-nSL (B, D, and F) under demographic histories Demo 1 (A and B), Demo 2 (C and D), and Demo 3 (E and F) with  $n = 100$  diploid samples from each population.  $s$  is the selection coefficient,  $f$  is the frequency of the adaptive allele at time of sampling,  $g$  is the number of generations at time of sampling since fixation,  $e$  is the frequency at which selection began, and  $t_d = 2000$  is the time in generations since the two populations diverged.

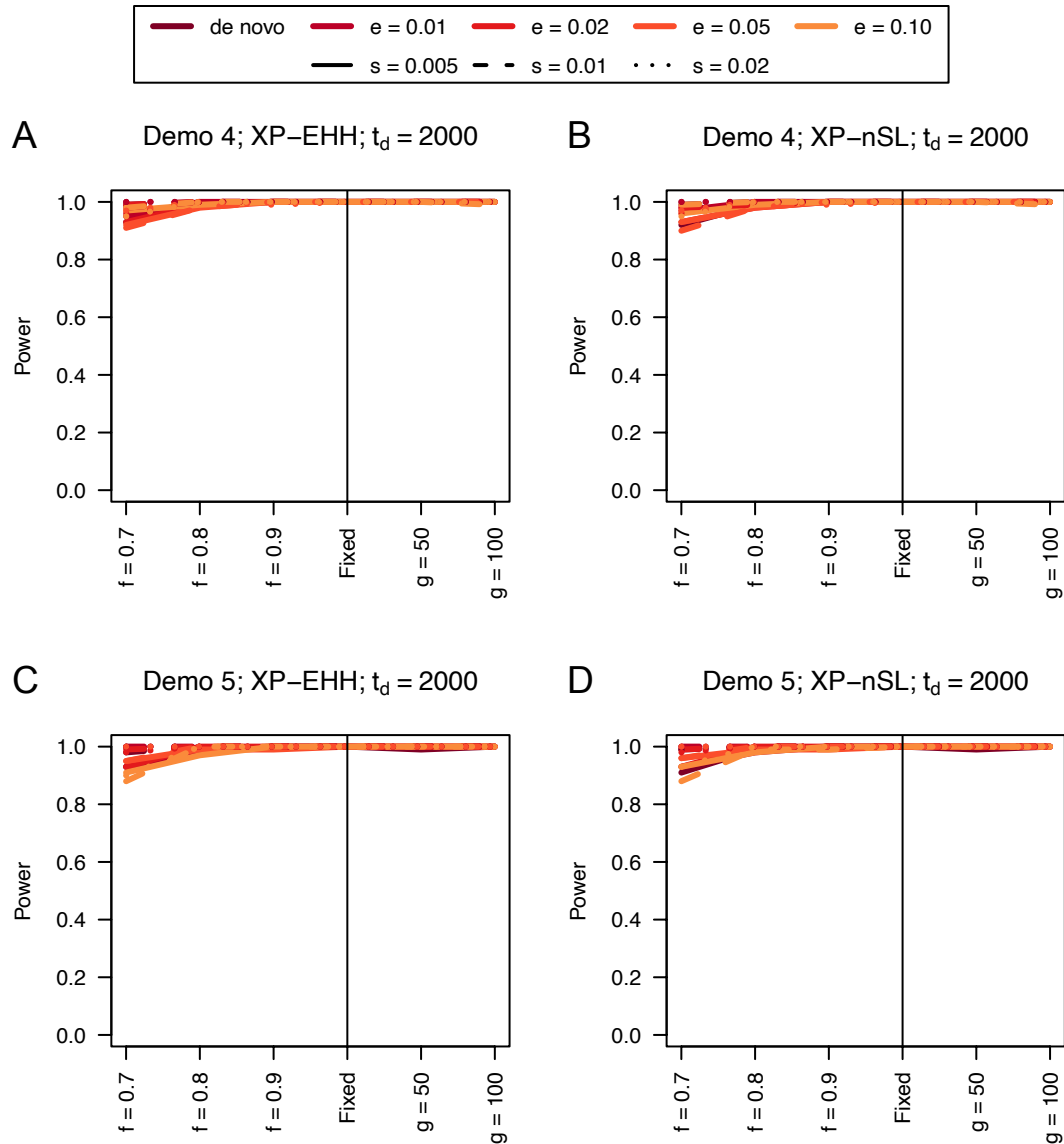

**Figure S3.** Power curves for unphased implementations of XP-EHH (A and C) and XP-nSL (B and D) under demographic histories Demo 4 (A and B), and Demo 5 (C and D) with  $n = 100$  diploid samples from each population.  $s$  is the selection coefficient,  $f$  is the frequency of the adaptive allele at time of sampling,  $g$  is the number of generations at time of sampling since fixation,  $e$  is the frequency at which selection began, and  $t_d = 2000$  is the time in generations since the two populations diverged.

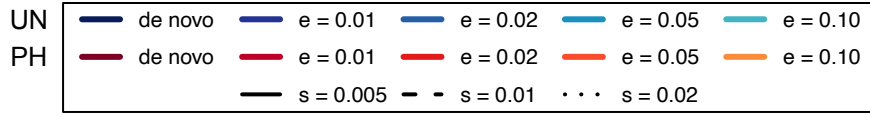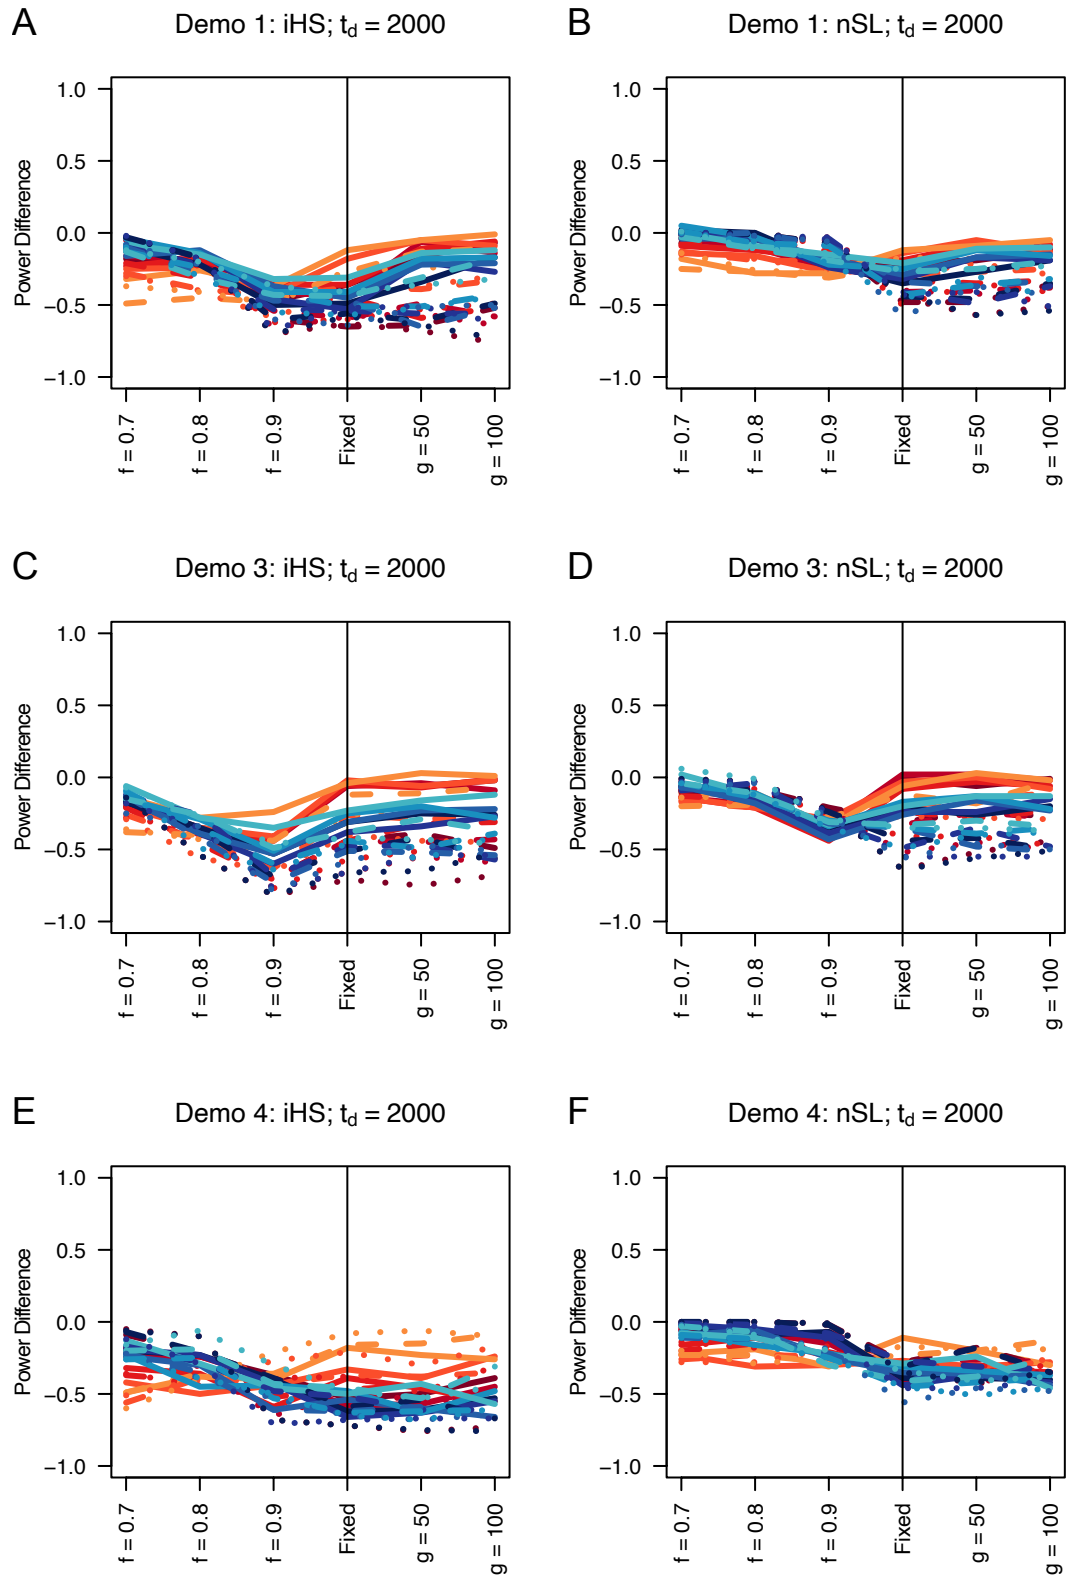

**Figure S4.** Power difference between unphased implementations of iHS (A, C, and E) and nSL (B, D, and F) and phased implementations. Blue curves represent the power difference between the unphased and phased statistics when applied to unphased data (UN). Red curves represent the power difference between the unphased and phased statistics when applied to perfectly phased data (PH). Values greater than 0 indicate the unphased statistic had higher power. Applied to demographic histories Demo 1 (A and B), Demo 3 (C and D), and Demo 4 (E and F) with  $n = 100$  diploid samples.  $s$  is the selection coefficient,  $f$  is the frequency of the adaptive allele at time of sampling,  $g$  is the number of generations at time of sampling since fixation,  $e$  is the frequency at which selection began, and  $t_d = 2000$  is the time in generations since the two populations diverged.

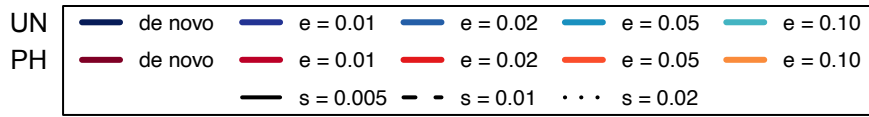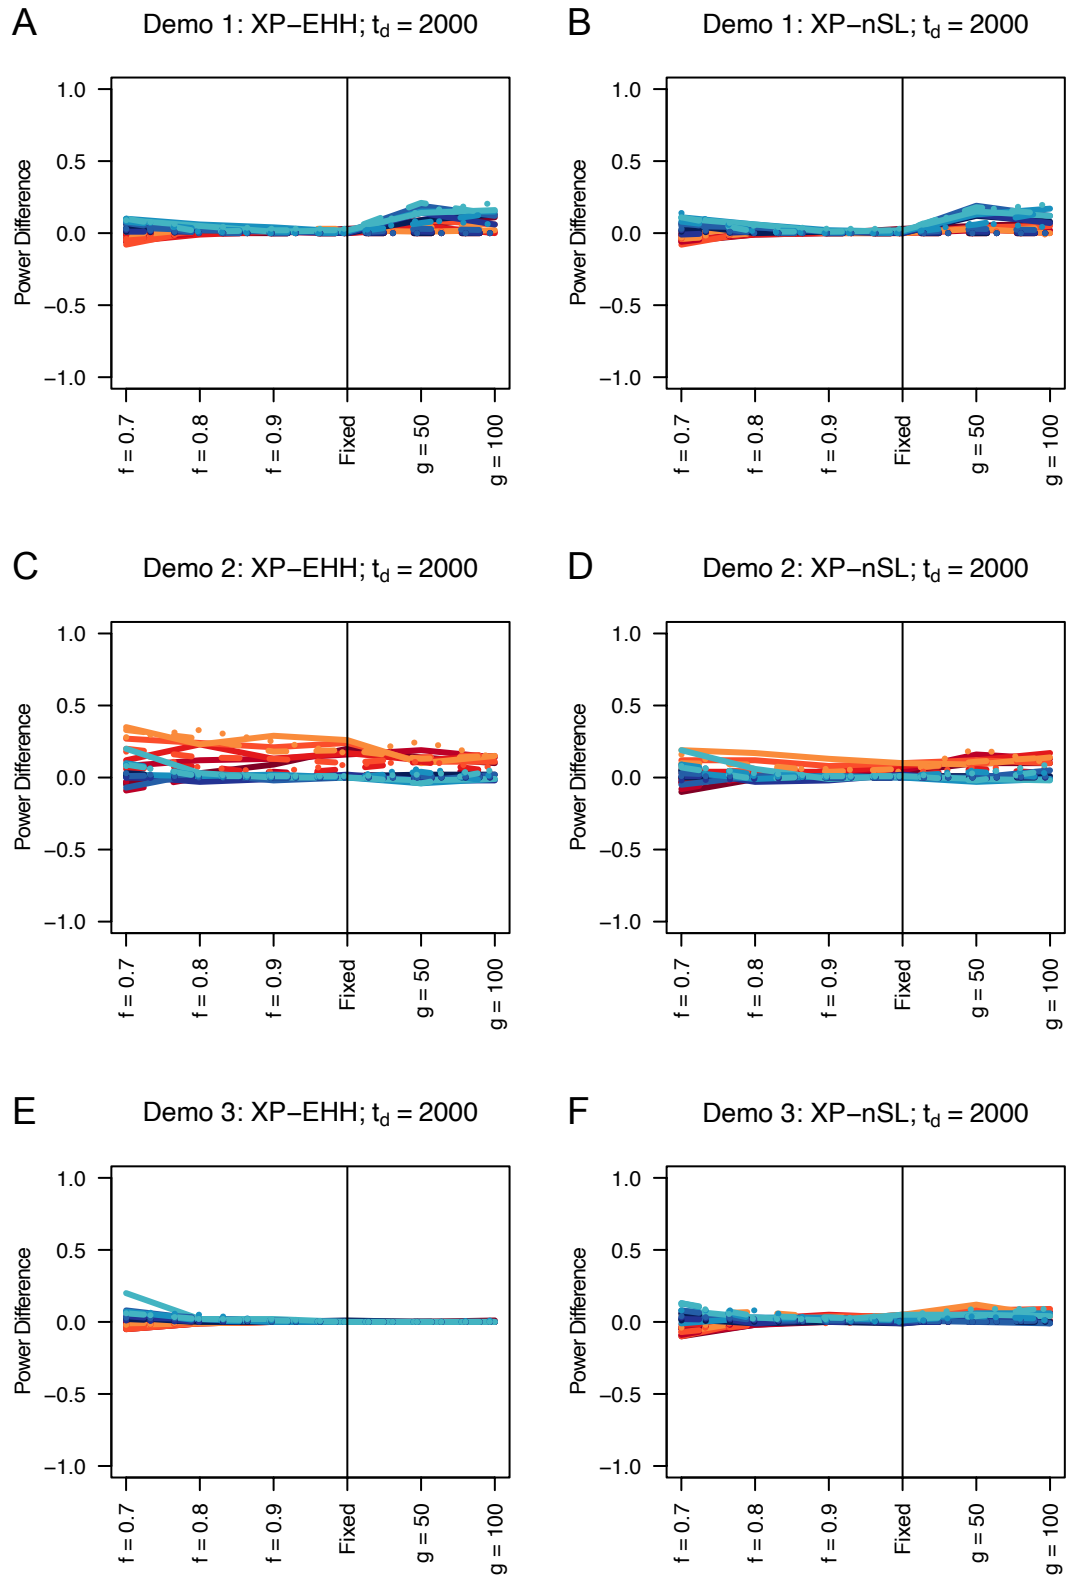

**Figure S5.** Power difference between unphased implementations of XP-EHH (A, C, and E) and XP-nSL (B, D, and F) and phased implementations. Blue curves represent the power difference between the unphased and phased statistics when applied to unphased data (UN). Red curves represent the power difference between the unphased and phased statistics when applied to perfectly phased data (PH). Values greater than 0 indicate the unphased statistic had higher power. Applied to demographic histories Demo 1 (A and B), Demo 2 (C and D), and Demo 3 (E and F) with  $n = 100$  diploid samples from each population.  $s$  is the selection coefficient,  $f$  is the frequency of the adaptive allele at time of sampling,  $g$  is the number of generations at time of sampling since fixation,  $e$  is the frequency at which selection began, and  $t_d = 2000$  is the time in generations since the two populations diverged.

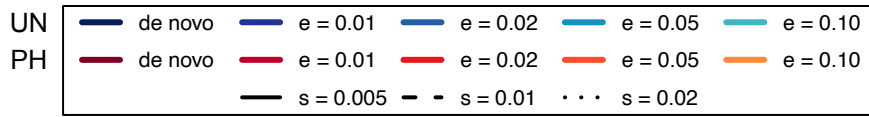

**A** Demo 4: XP-EHH;  $t_d = 2000$

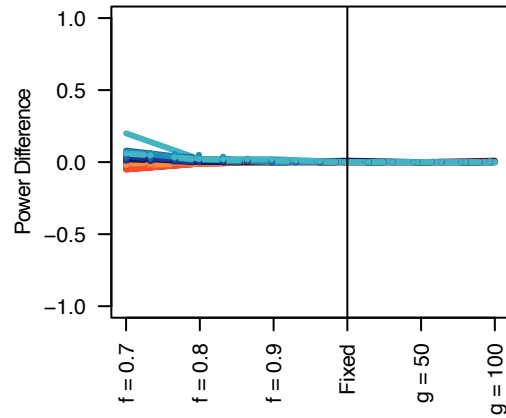

**B** Demo 4: XP-nSL;  $t_d = 2000$

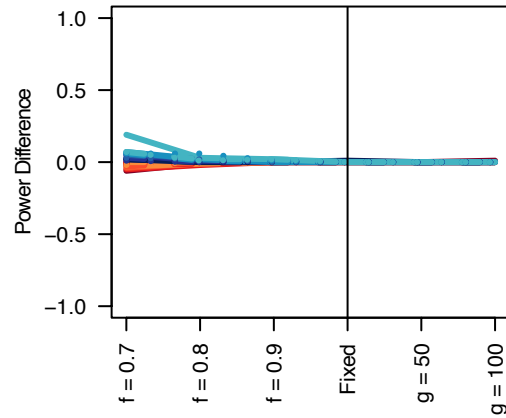

**C** Demo 5: XP-EHH;  $t_d =$

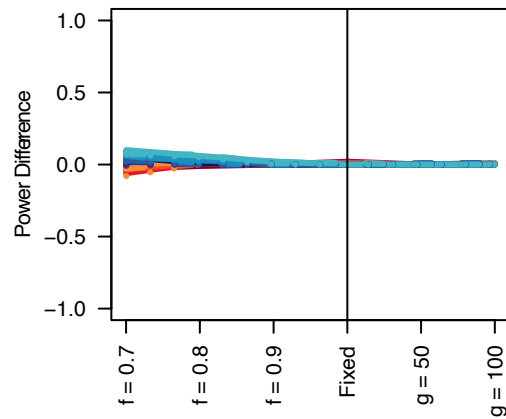

**D** Demo 5: XP-nSL;  $t_d = 2000$

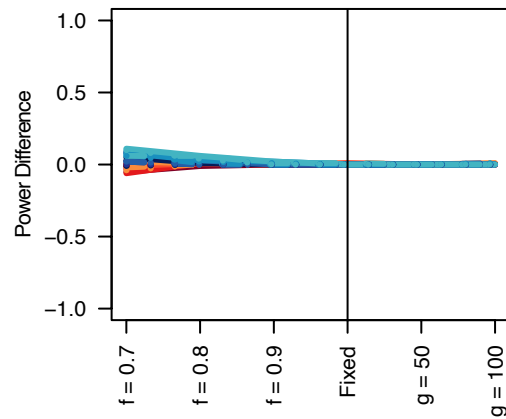

**E** Demo 3: XP-EHH;  $t_d = 2000$

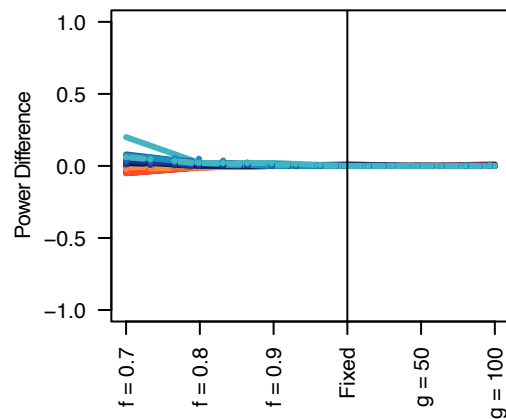

**F** Demo 3: XP-nSL;  $t_d = 2000$

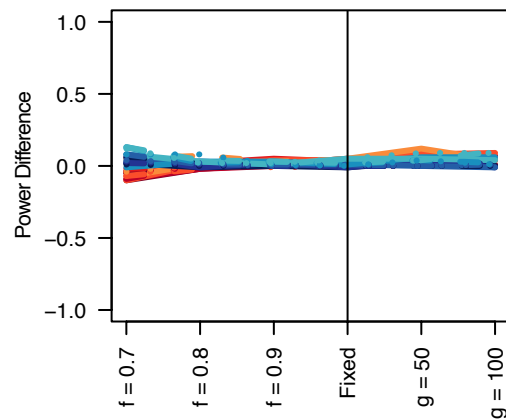

**Figure S6.** Power difference between unphased implementations of XP-EHH (A and C) and XP-nSL (B and D) and phased implementations. Blue curves represent the power difference between the unphased and phased statistics when applied to unphased data (UN). Red curves represent the power difference between the unphased and phased statistics when applied to perfectly phased data (PH). Values greater than 0 indicate the unphased statistic had higher power. Applied to demographic histories Demo 4 (A and B), and Demo 5 (C and D) with  $n = 100$  diploid samples from each population.  $s$  is the selection coefficient,  $f$  is the frequency of the adaptive allele at time of sampling,  $g$  is the number of generations at time of sampling since fixation,  $e$  is the frequency at which selection began, and  $t_d = 2000$  is the time in generations since the two populations diverged.

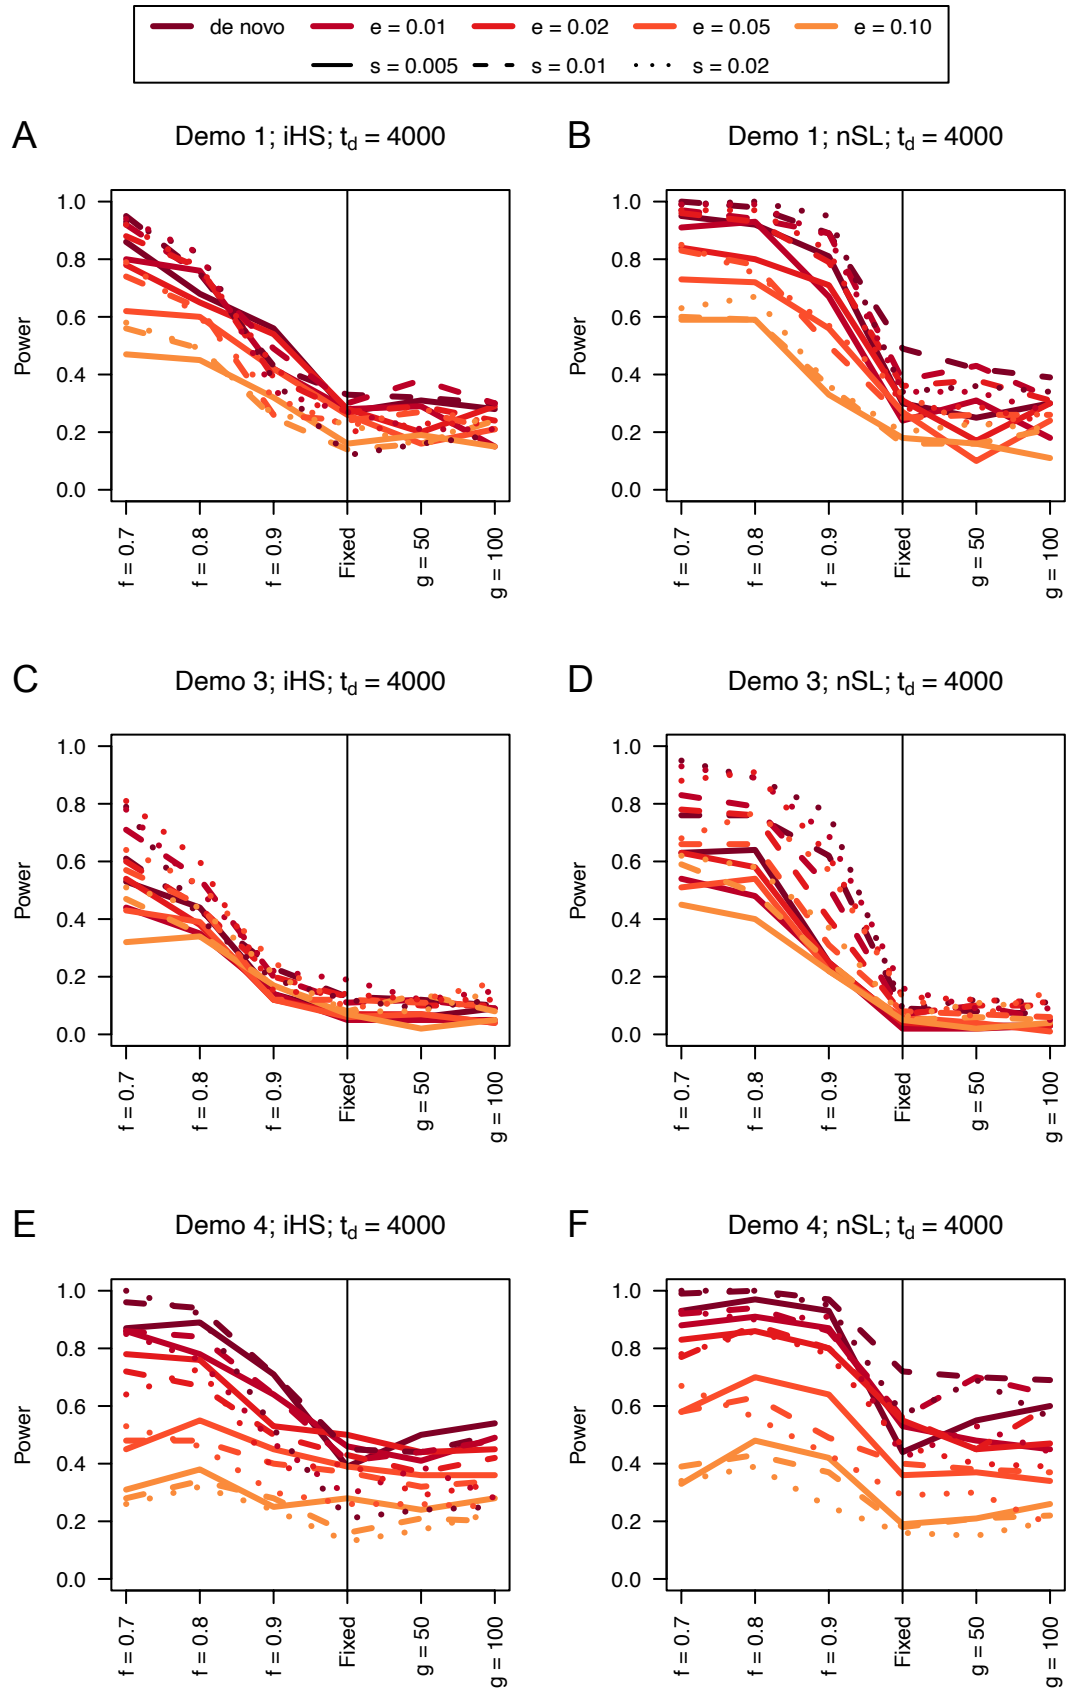

105 **Figure S7.** Power curves for unphased implementations of iHS (A, C, and E) and nSL (B, D, and F)  
106 under demographic histories Demo 1 (A and B), Demo 3 (C and D), and Demo 4 (E and F) with  $n = 100$   
107 diploid samples.  $s$  is the selection coefficient,  $f$  is the frequency of the adaptive allele at time of  
108 sampling,  $g$  is the number of generations at time of sampling since fixation,  $e$  is the frequency at which  
109 selection began, and  $t_d = 4000$  is the time in generations since the two populations diverged.

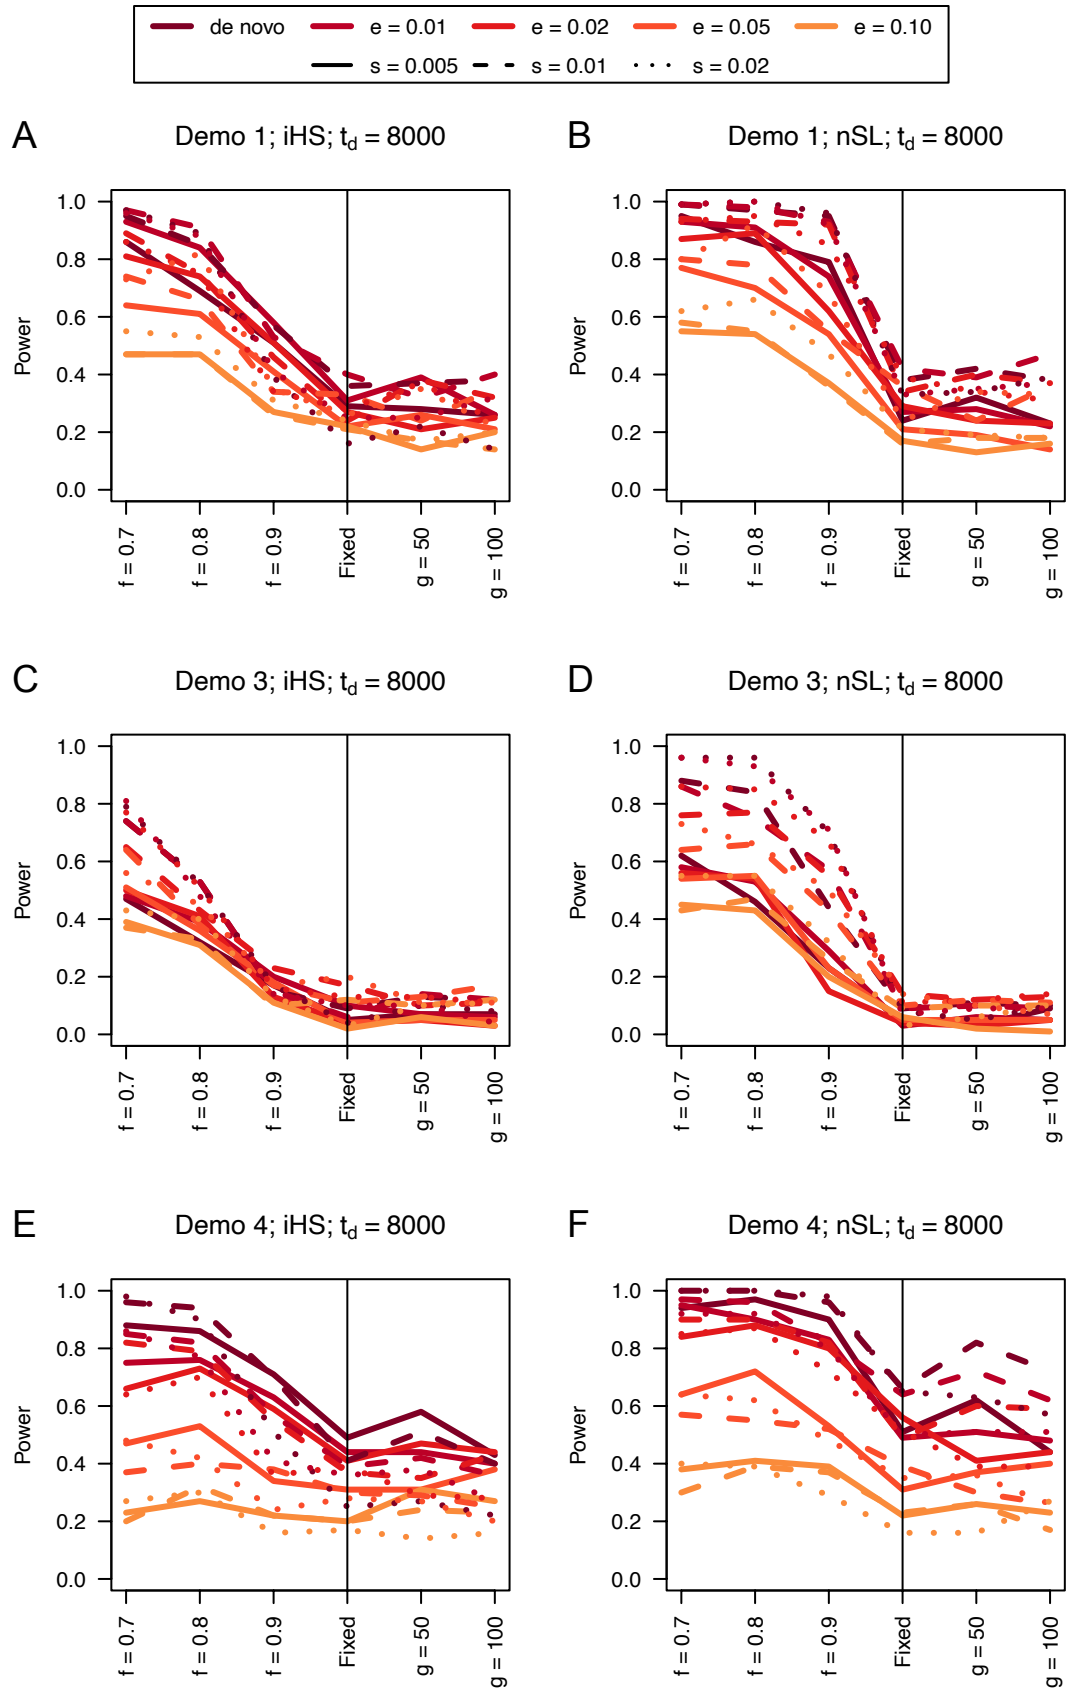

111 **Figure S8.** Power curves for unphased implementations of iHS (A, C, and E) and nSL (B, D, and F)  
112 under demographic histories Demo 1 (A and B), Demo 3 (C and D), and Demo 4 (E and F) with  $n = 100$   
113 diploid samples.  $s$  is the selection coefficient,  $f$  is the frequency of the adaptive allele at time of  
114 sampling,  $g$  is the number of generations at time of sampling since fixation,  $e$  is the frequency at which  
115 selection began, and  $t_d = 8000$  is the time in generations since the two populations diverged.

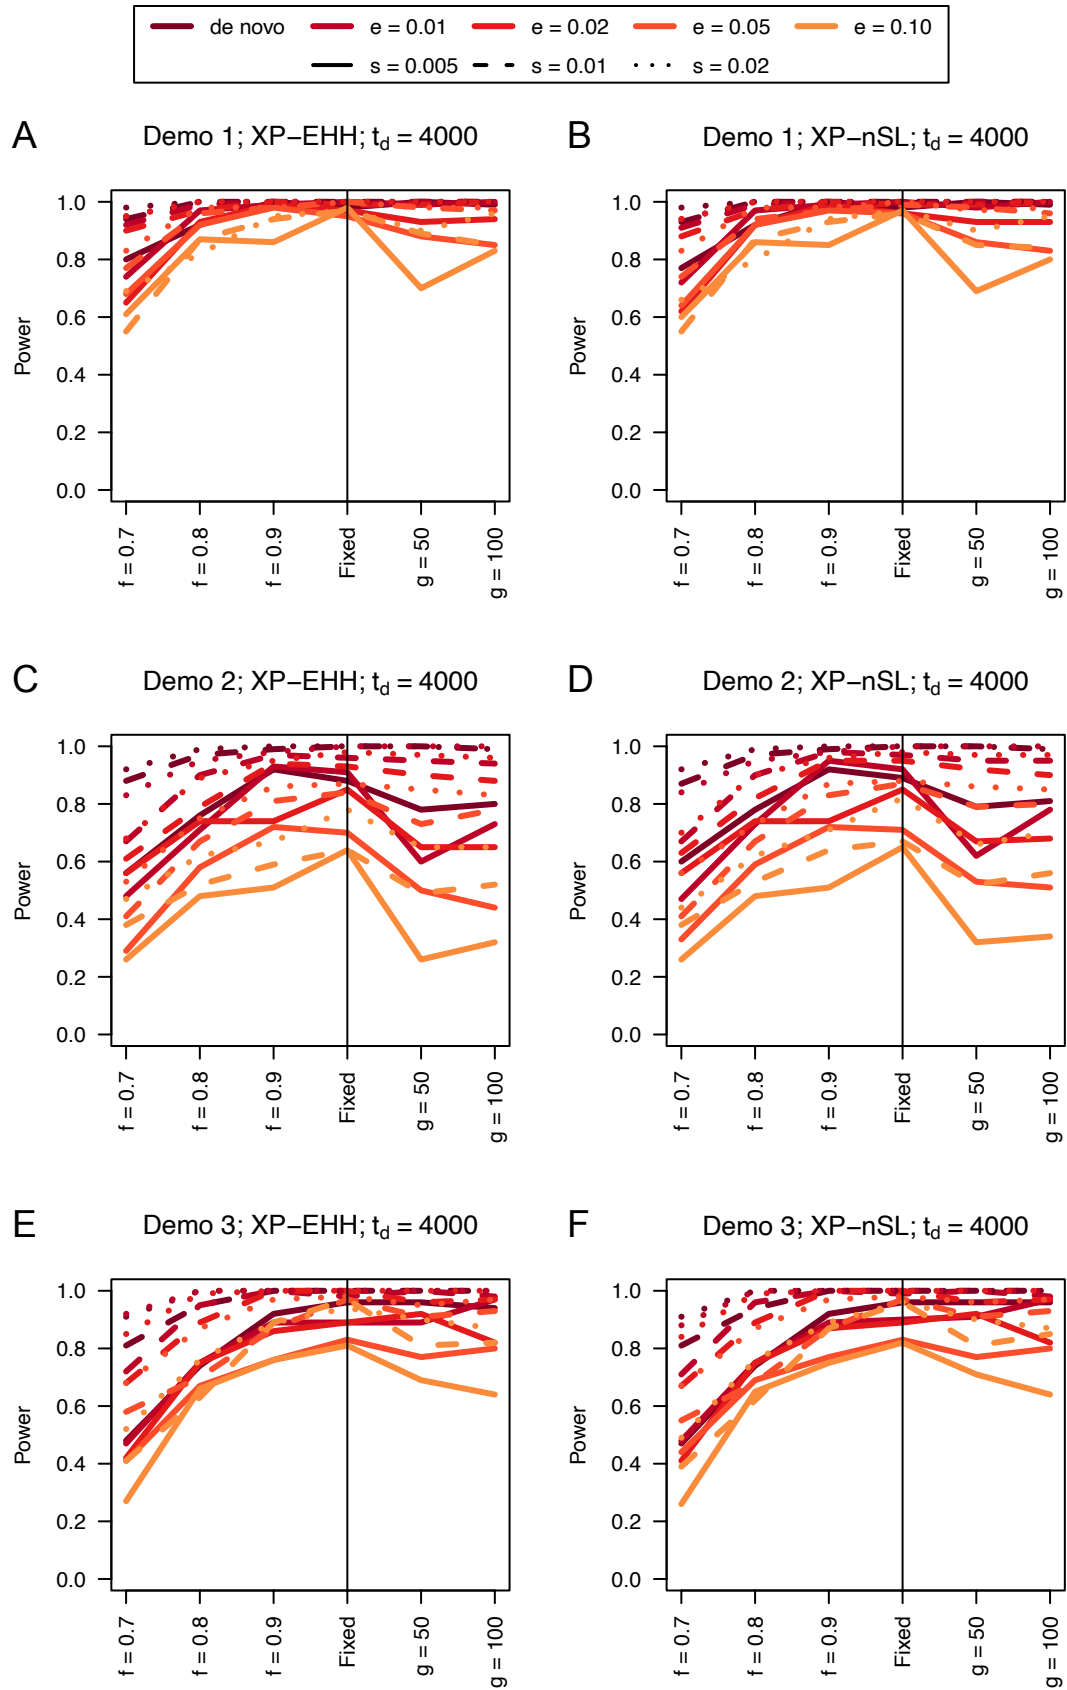

**Figure S9.** Power difference between unphased implementations of XP-EHH (A, C, and E) and XP-nSL (B, D, and F) and phased implementations. Blue curves represent the power difference between the unphased and phased statistics when applied to unphased data (UN). Red curves represent the power difference between the unphased and phased statistics when applied to perfectly phased data (PH). Values greater than 0 indicate the unphased statistic had higher power. Applied to demographic histories Demo 1 (A and B), Demo 2 (C and D), and Demo 3 (E and F) with  $n = 100$  diploid samples from each population.  $s$  is the selection coefficient,  $f$  is the frequency of the adaptive allele at time of sampling,  $g$  is the number of generations at time of sampling since fixation,  $e$  is the frequency at which selection began, and  $t_d = 4000$  is the time in generations since the two populations diverged.

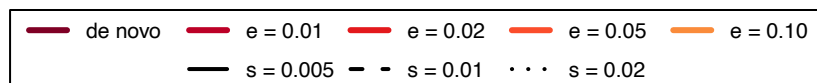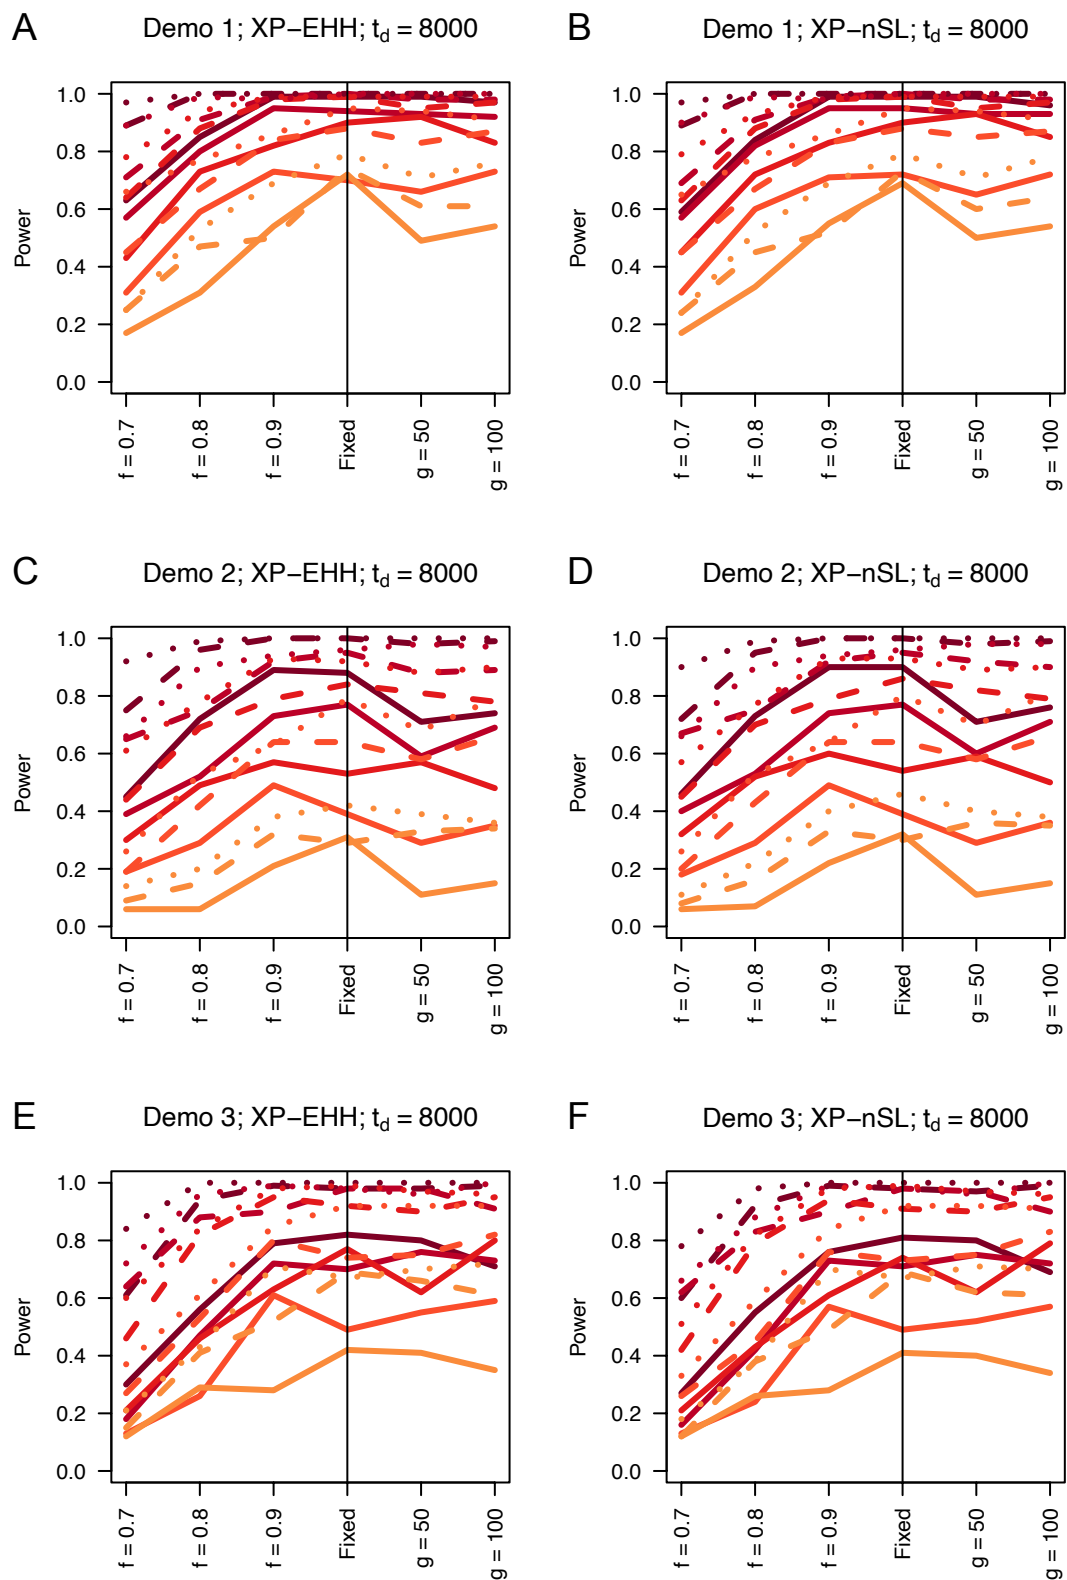

**Figure S10.** Power difference between unphased implementations of XP-EHH (A, C, and E) and XP-nSL (B, D, and F) and phased implementations. Blue curves represent the power difference between the unphased and phased statistics when applied to unphased data (UN). Red curves represent the power difference between the unphased and phased statistics when applied to perfectly phased data (PH). Values greater than 0 indicate the unphased statistic had higher power. Applied to demographic histories Demo 1 (A and B), Demo 2 (C and D), and Demo 3 (E and F) with  $n = 100$  diploid samples from each population.  $s$  is the selection coefficient,  $f$  is the frequency of the adaptive allele at time of sampling,  $g$  is the number of generations at time of sampling since fixation,  $e$  is the frequency at which selection began, and  $t_d = 8000$  is the time in generations since the two populations diverged.

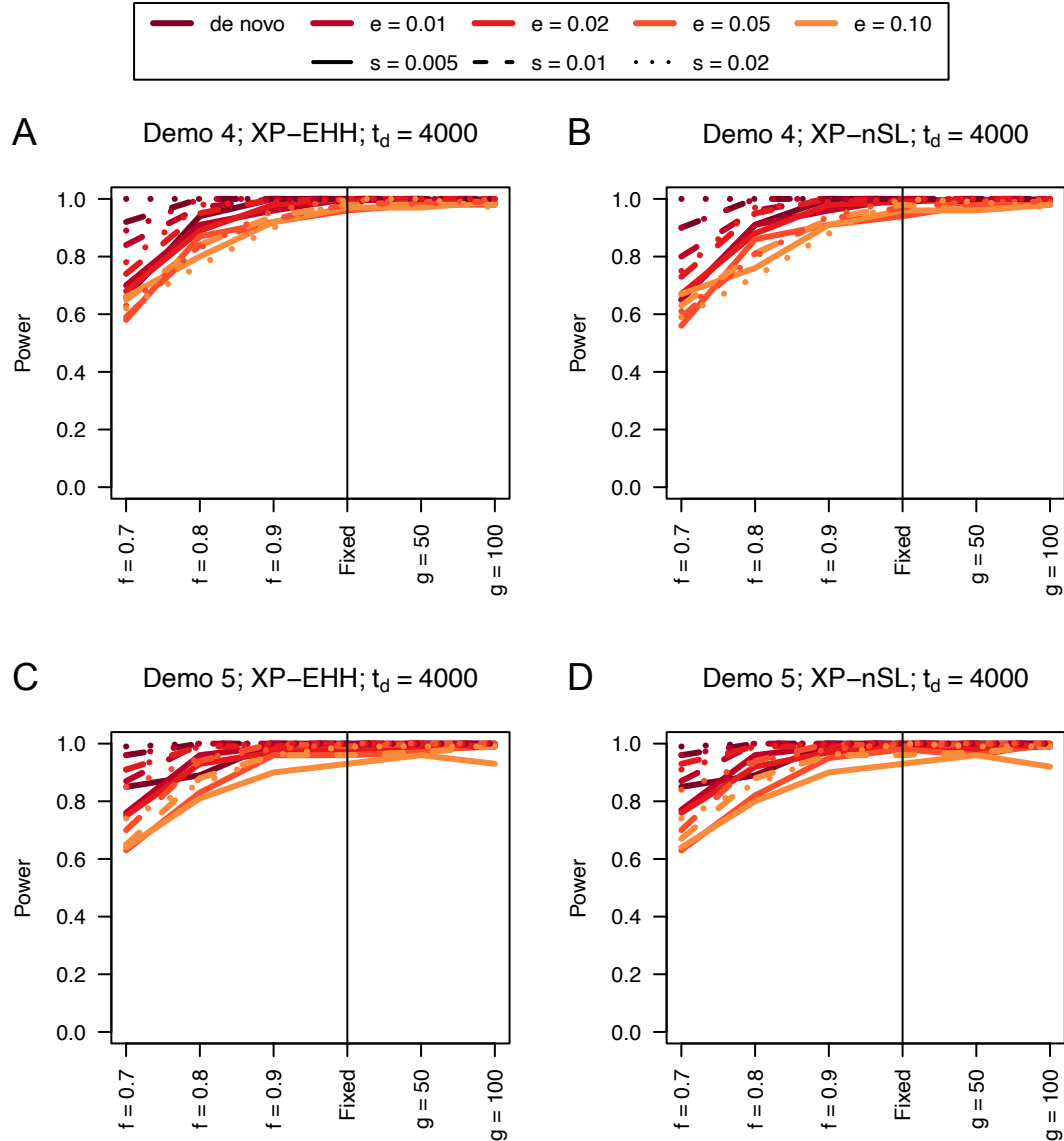

**Figure S11.** Power curves for unphased implementations of XP-EHH (A and C) and XP-nSL (B and D) under demographic histories Demo 4 (A and B), and Demo 5 (C and D) with  $n = 100$  diploid samples from each population.  $s$  is the selection coefficient,  $f$  is the frequency of the adaptive allele at time of sampling,  $g$  is the number of generations at time of sampling since fixation,  $e$  is the frequency at which selection began, and  $t_d = 4000$  is the time in generations since the two populations diverged.

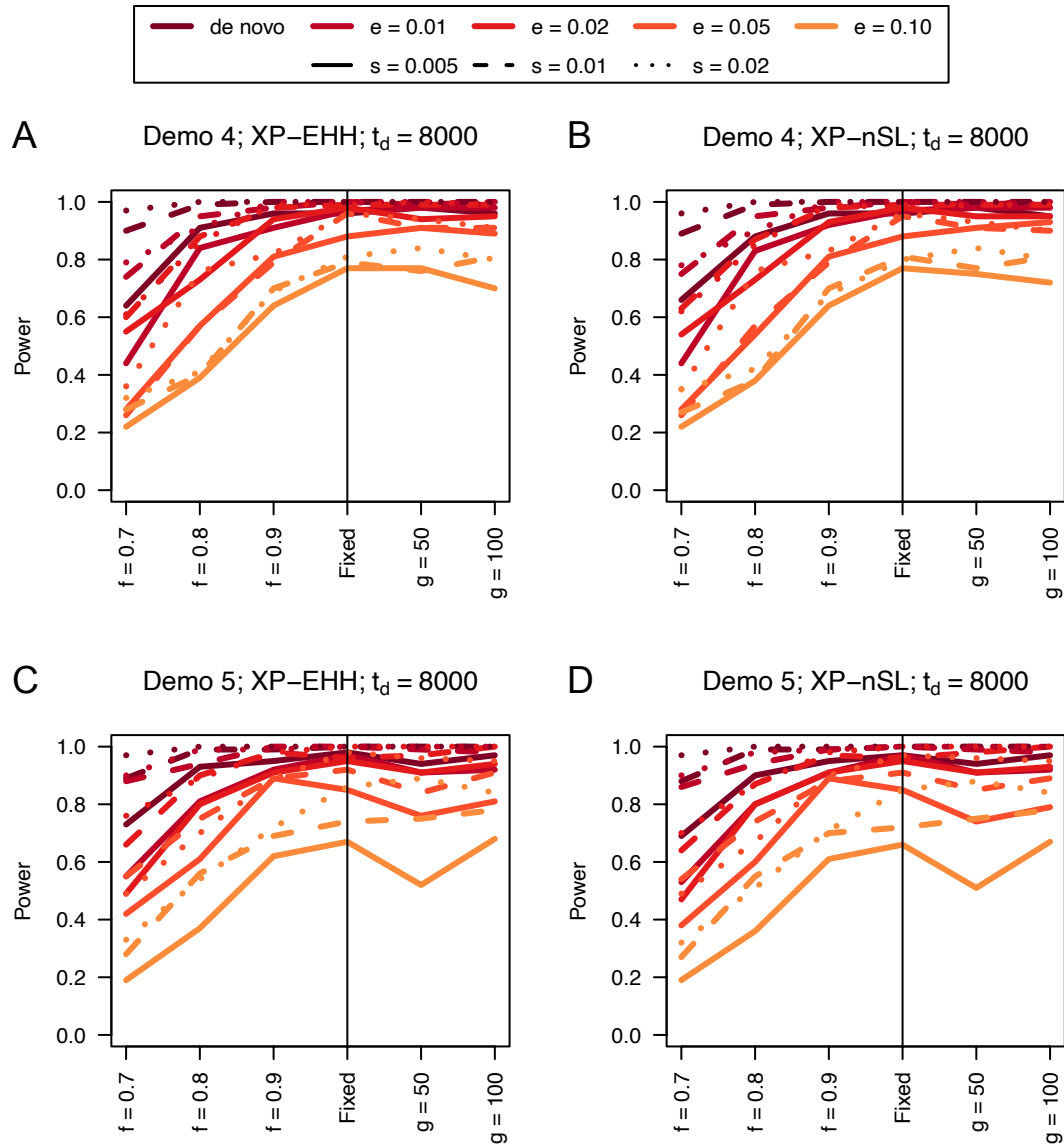

**Figure S12.** Power curves for unphased implementations of XP-EHH (A and C) and XP-nSL (B and D) under demographic histories Demo 4 (A and B), and Demo 5 (C and D) with  $n = 100$  diploid samples from each population.  $s$  is the selection coefficient,  $f$  is the frequency of the adaptive allele at time of sampling,  $g$  is the number of generations at time of sampling since fixation,  $e$  is the frequency at which selection began, and  $t_d = 8000$  is the time in generations since the two populations diverged.

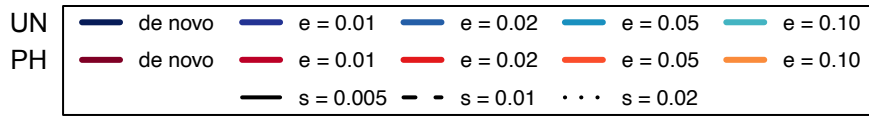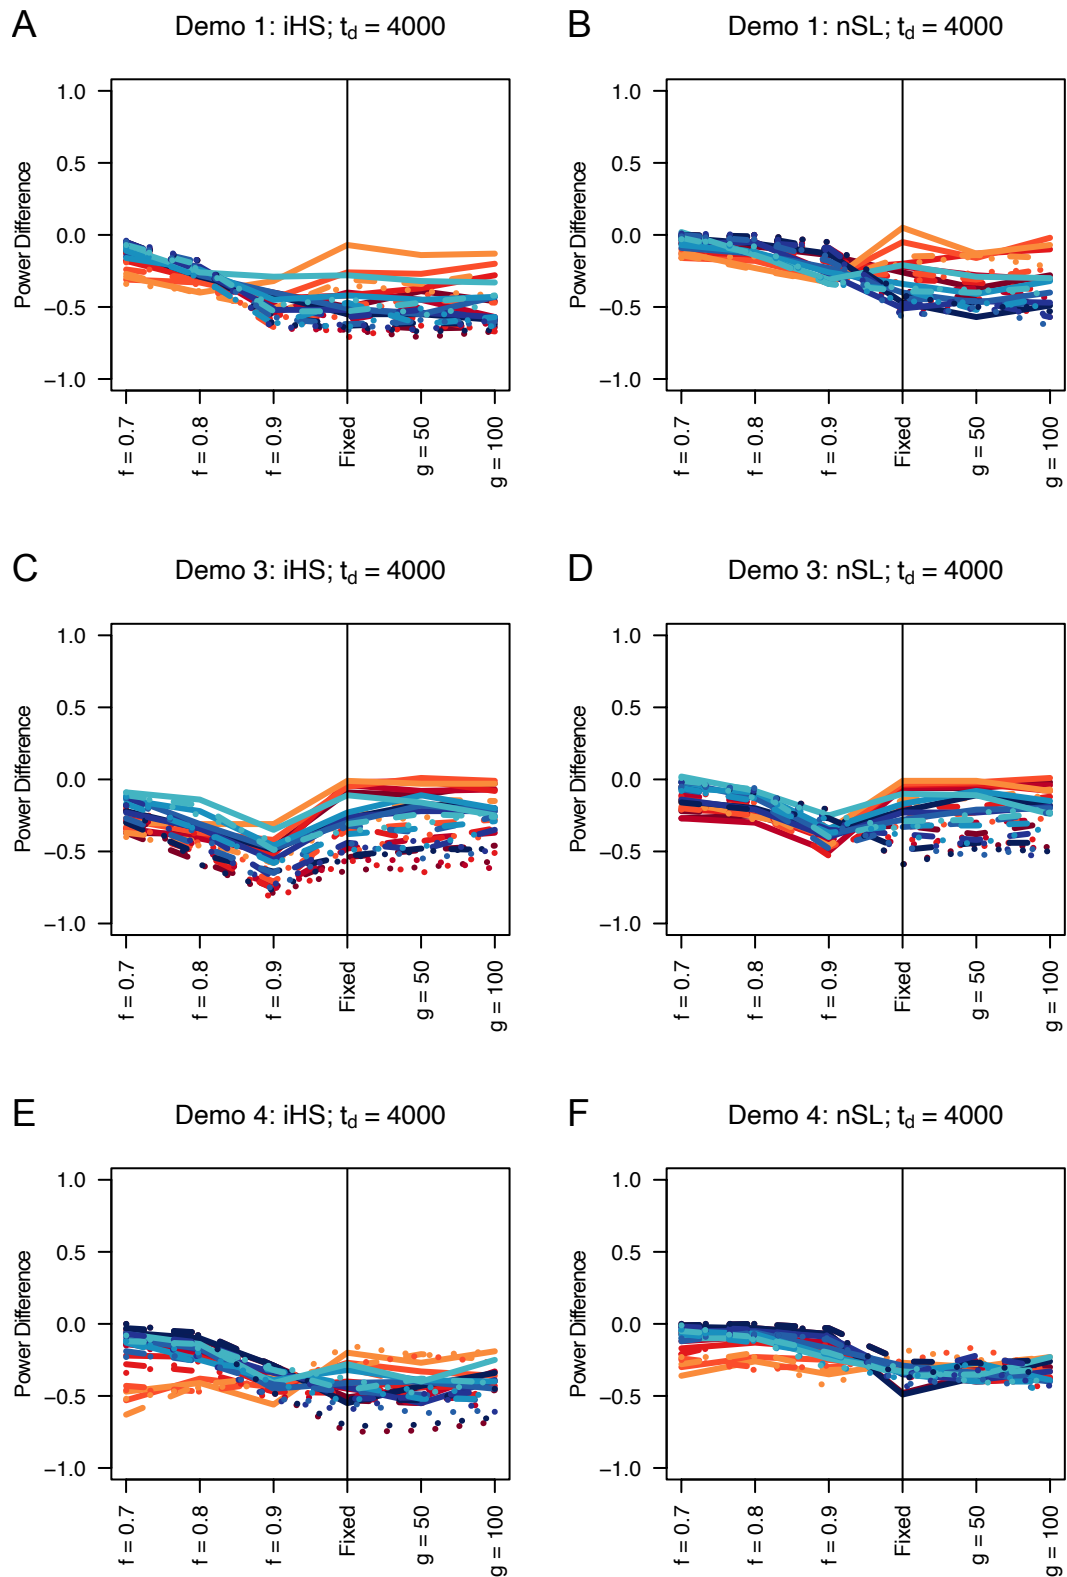

**Figure S13.** Power difference between unphased implementations of iHS (A, C, and E) and nSL (B, D, and F) and phased implementations. Blue curves represent the power difference between the unphased and phased statistics when applied to unphased data (UN). Red curves represent the power difference between the unphased and phased statistics when applied to perfectly phased data (PH). Values greater than 0 indicate the unphased statistic had higher power. Applied to demographic histories Demo 1 (A and B), Demo 3 (C and D), and Demo 4 (E and F) with  $n = 100$  diploid samples.  $s$  is the selection coefficient,  $f$  is the frequency of the adaptive allele at time of sampling,  $g$  is the number of generations at time of sampling since fixation,  $e$  is the frequency at which selection began, and  $t_d = 4000$  is the time in generations since the two populations diverged.

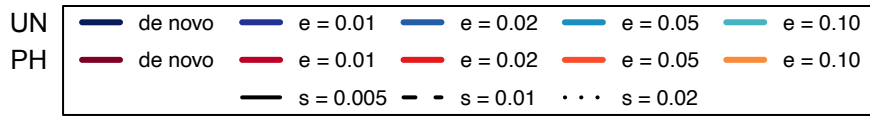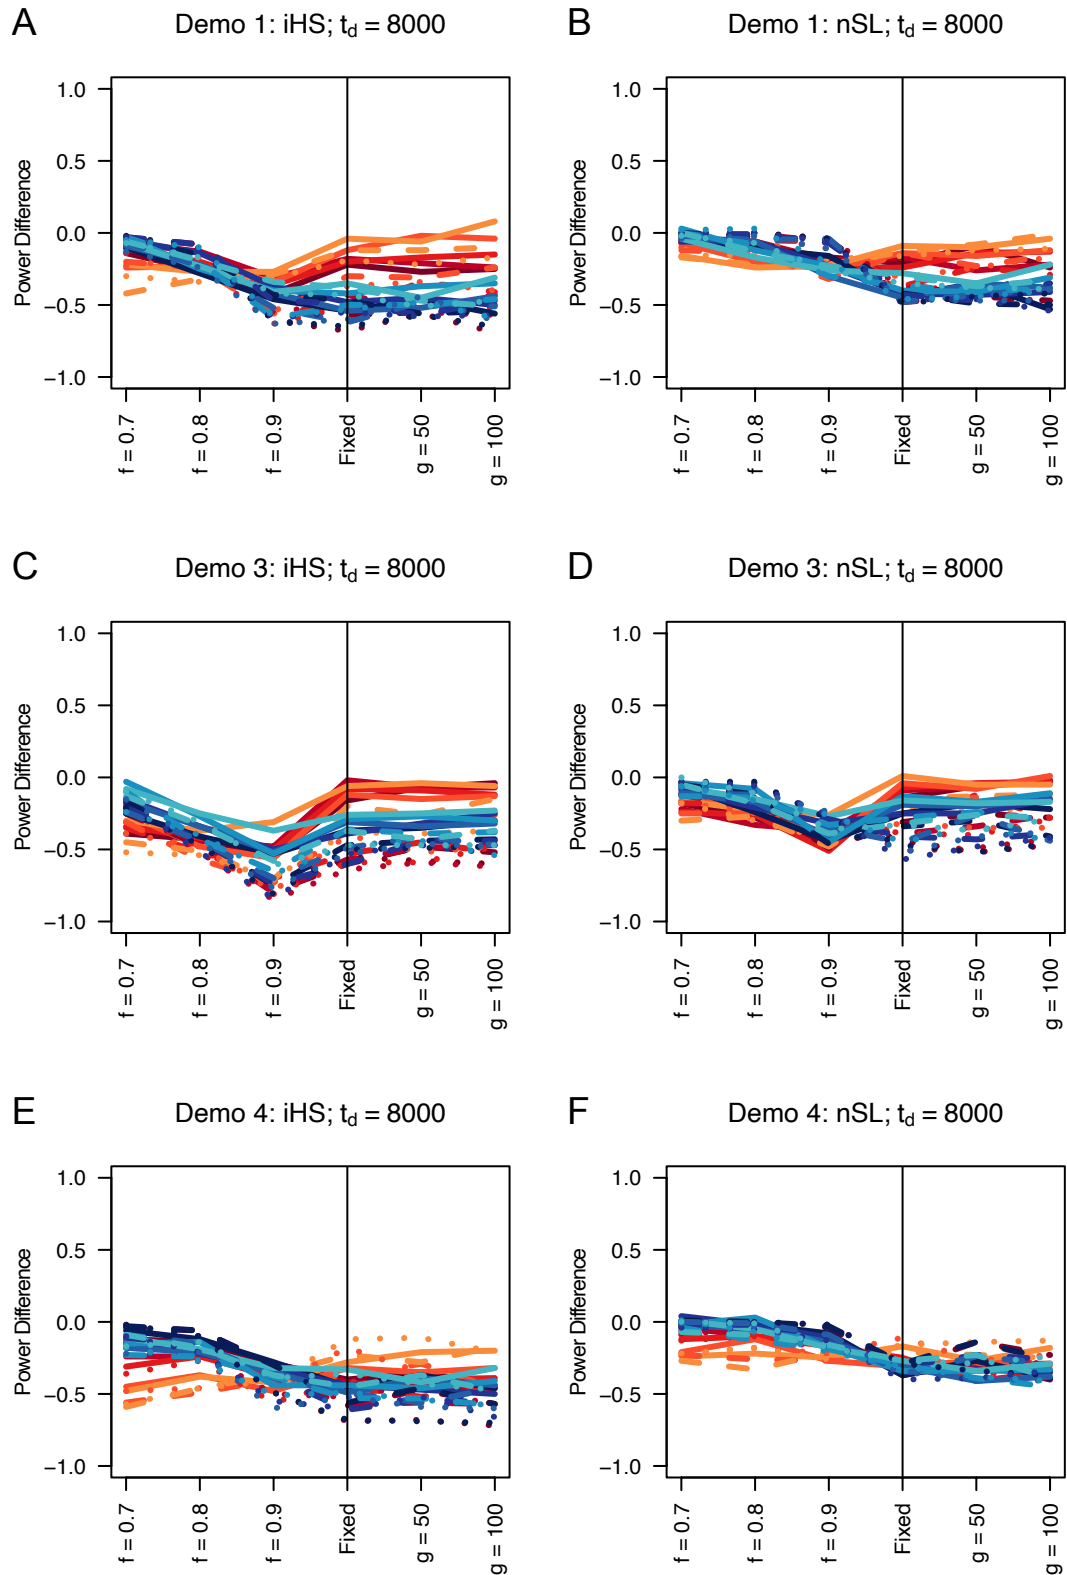

**Figure S14.** Power difference between unphased implementations of iHS (A, C, and E) and nSL (B, D, and F) and phased implementations. Blue curves represent the power difference between the unphased and phased statistics when applied to unphased data (UN). Red curves represent the power difference between the unphased and phased statistics when applied to perfectly phased data (PH). Values greater than 0 indicate the unphased statistic had higher power. Applied to demographic histories Demo 1 (A and B), Demo 3 (C and D), and Demo 4 (E and F) with  $n = 100$  diploid samples.  $s$  is the selection coefficient,  $f$  is the frequency of the adaptive allele at time of sampling,  $g$  is the number of generations at time of sampling since fixation,  $e$  is the frequency at which selection began, and  $t_d = 8000$  is the time in generations since the two populations diverged.

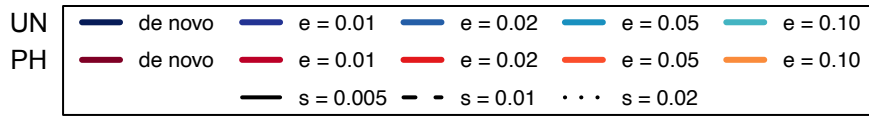

**A** Demo 1: XP-EHH;  $t_d = 4000$

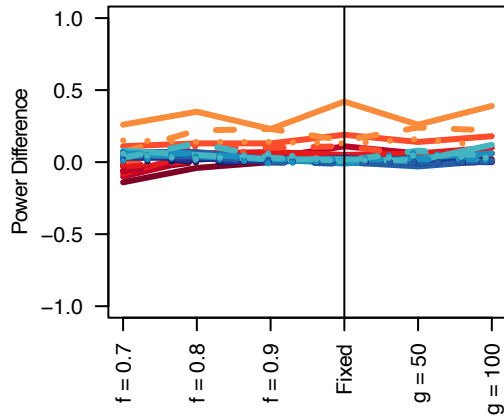

**B** Demo 1: XP-nSL;  $t_d = 4000$

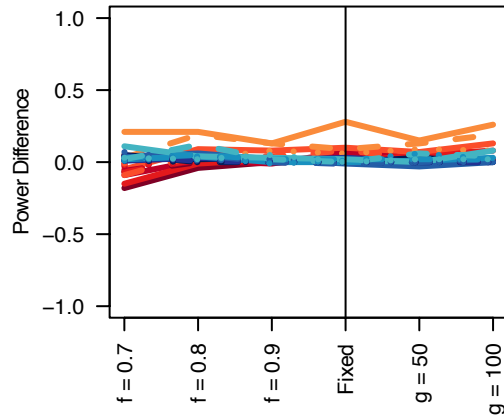

**C** Demo 2: XP-EHH;  $t_d = 4000$

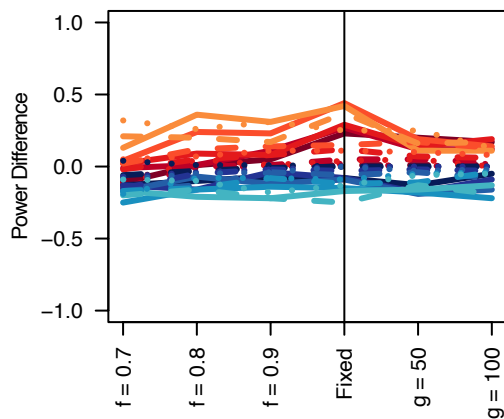

**D** Demo 2: XP-nSL;  $t_d = 4000$

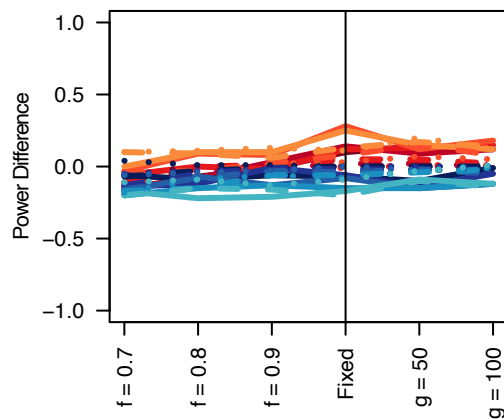

**E** Demo 3: XP-EHH;  $t_d = 4000$

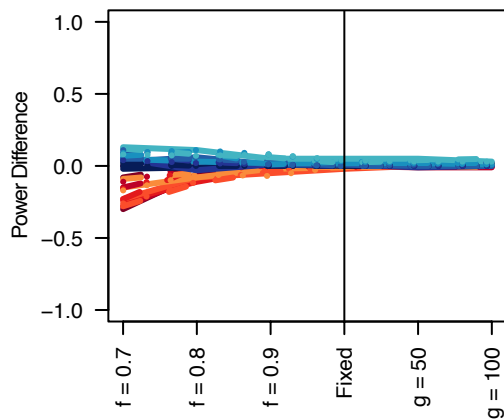

**F** Demo 3: XP-nSL;  $t_d = 4000$

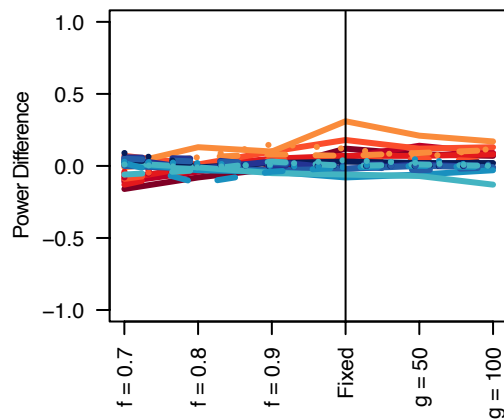

**Figure S15.** Power difference between unphased implementations of XP-EHH (A, C, and E) and XP-nSL (B, D, and F) and phased implementations. Blue curves represent the power difference between the unphased and phased statistics when applied to unphased data (UN). Red curves represent the power difference between the unphased and phased statistics when applied to perfectly phased data (PH). Values greater than 0 indicate the unphased statistic had higher power. Applied to demographic histories Demo 1 (A and B), Demo 2 (C and D), and Demo 3 (E and F) with  $n = 100$  diploid samples from each population.  $s$  is the selection coefficient,  $f$  is the frequency of the adaptive allele at time of sampling,  $g$  is the number of generations at time of sampling since fixation,  $e$  is the frequency at which selection began, and  $t_d = 4000$  is the time in generations since the two populations diverged.

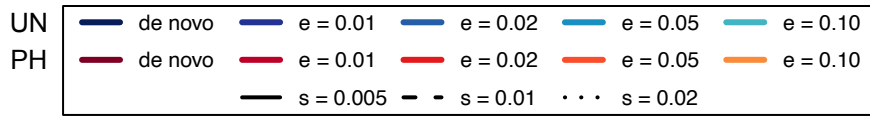

**A** Demo 1: XP-EHH;  $t_d = 8000$

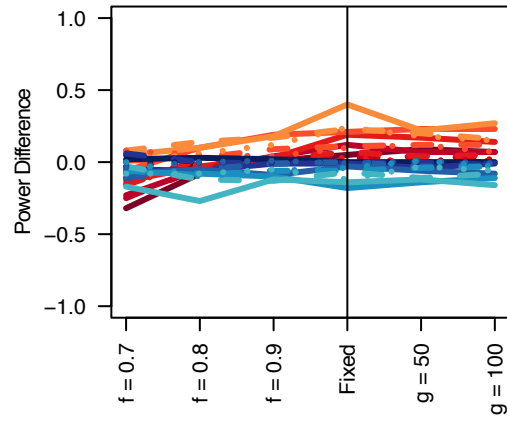

**B** Demo 1: XP-nSL;  $t_d = 8000$

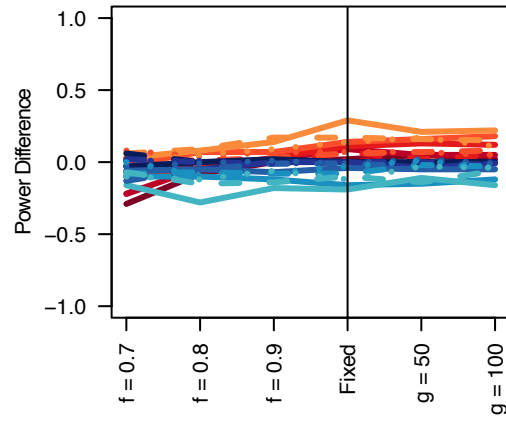

**C** Demo 2: XP-EHH;  $t_d = 8000$

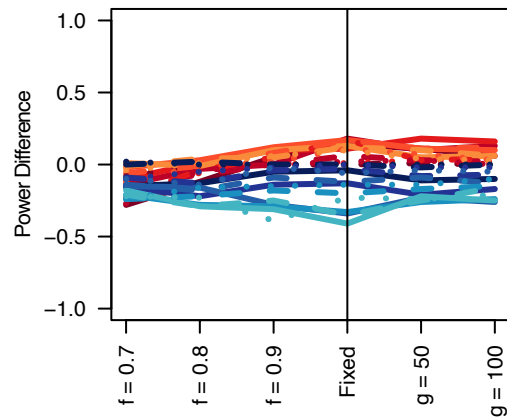

**D** Demo 2: XP-nSL;  $t_d = 8000$

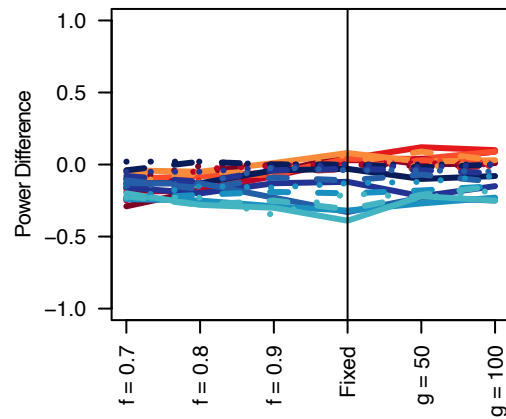

**E** Demo 3: XP-EHH;  $t_d = 8000$

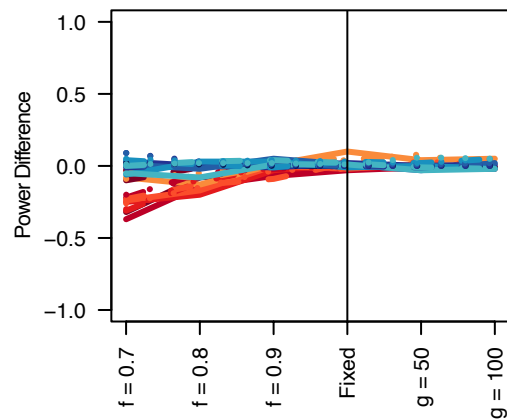

**F** Demo 3: XP-nSL;  $t_d = 8000$

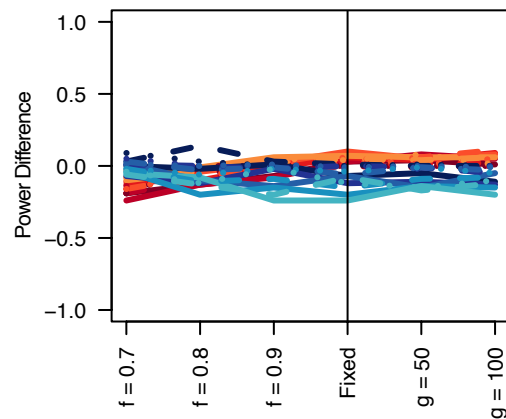

**Figure S16.** Power difference between unphased implementations of XP-EHH (A, C, and E) and XP-nSL (B, D, and F) and phased implementations. Blue curves represent the power difference between the unphased and phased statistics when applied to unphased data (UN). Red curves represent the power difference between the unphased and phased statistics when applied to perfectly phased data (PH). Values greater than 0 indicate the unphased statistic had higher power. Applied to demographic histories Demo 1 (A and B), Demo 2 (C and D), and Demo 3 (E and F) with  $n = 100$  diploid samples from each population.  $s$  is the selection coefficient,  $f$  is the frequency of the adaptive allele at time of sampling,  $g$  is the number of generations at time of sampling since fixation,  $e$  is the frequency at which selection began, and  $t_d = 8000$  is the time in generations since the two populations diverged.

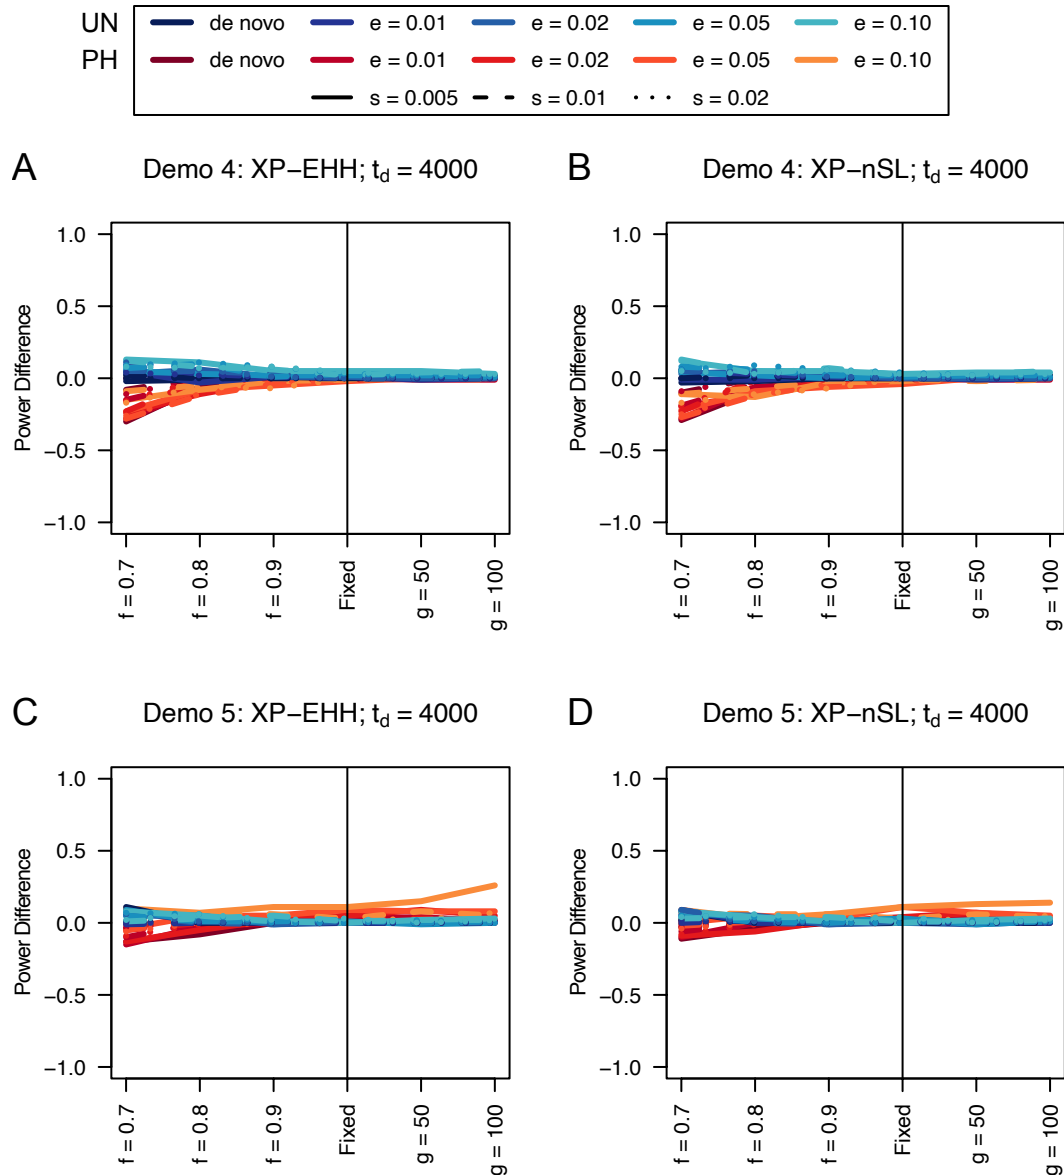

**Figure S17.** Power difference between unphased implementations of XP-EHH (A and C) and XP-nSL (B and D) and phased implementations. Blue curves represent the power difference between the unphased and phased statistics when applied to unphased data (UN). Red curves represent the power difference between the unphased and phased statistics when applied to perfectly phased data (PH). Values greater than 0 indicate the unphased statistic had higher power. Applied to demographic histories Demo 4 (A and B), and Demo 5 (C and D) with  $n = 100$  diploid samples from each population.  $s$  is the selection coefficient,  $f$  is the frequency of the adaptive allele at time of sampling,  $g$  is the number of generations at time of sampling since fixation,  $e$  is the frequency at which selection began, and  $t_d = 4000$  is the time in generations since the two populations diverged.

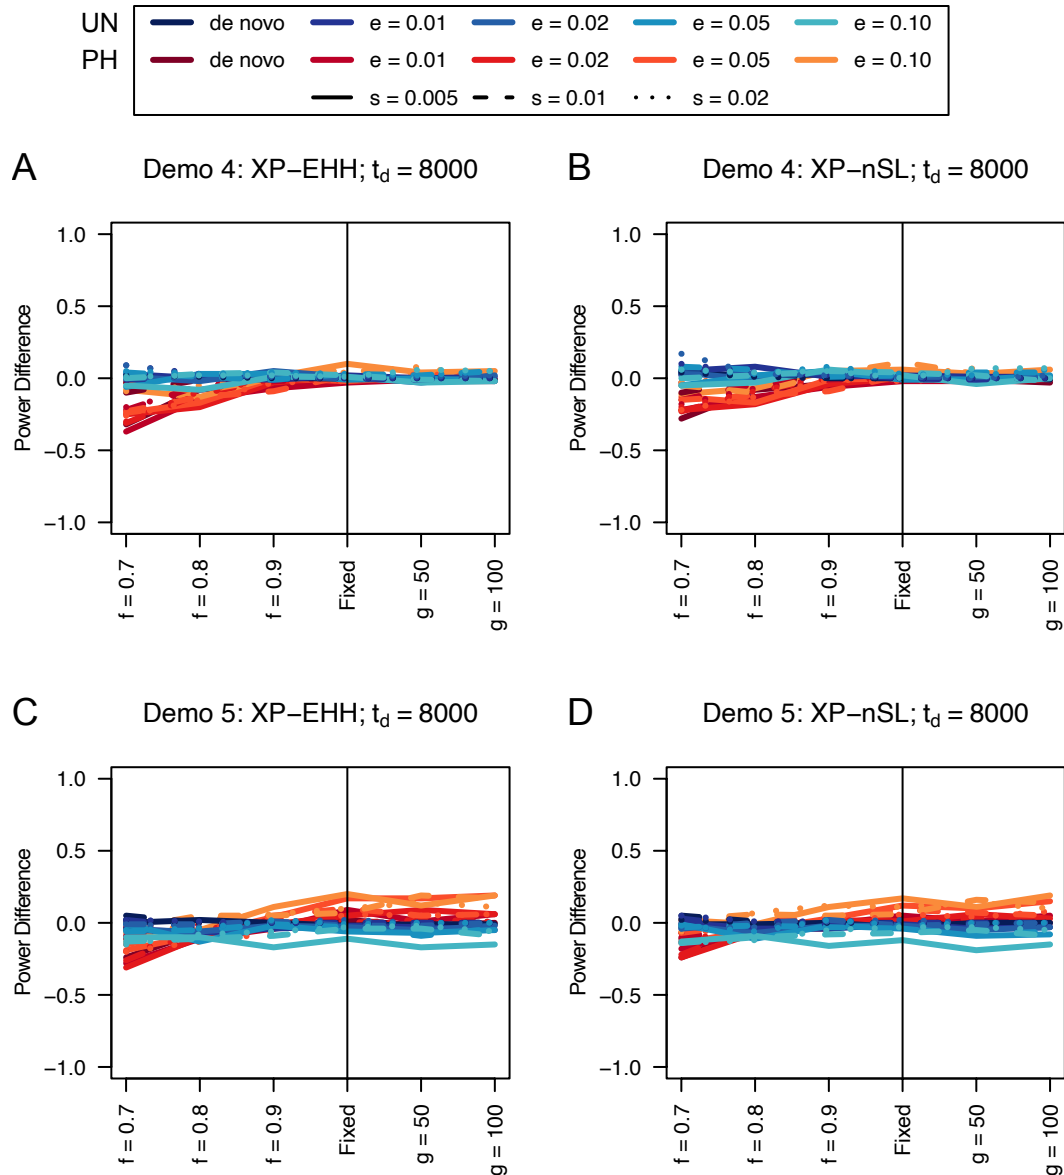

**Table S18.** Power difference between unphased implementations of XP-EHH (A and C) and XP-nSL (B and D) and phased implementations. Blue curves represent the power difference between the unphased and phased statistics when applied to unphased data (UN). Red curves represent the power difference between the unphased and phased statistics when applied to perfectly phased data (PH). Values greater than 0 indicate the unphased statistic had higher power. Applied to demographic histories Demo 4 (A and B), and Demo 5 (C and D) with  $n = 100$  diploid samples from each population.  $s$  is the selection coefficient,  $f$  is the frequency of the adaptive allele at time of sampling,  $g$  is the number of generations at time of sampling since fixation,  $e$  is the frequency at which selection began, and  $t_d = 8000$  is the time in generations since the two populations diverged.

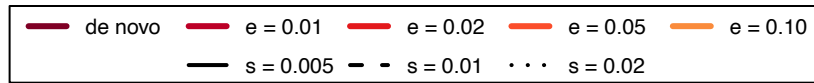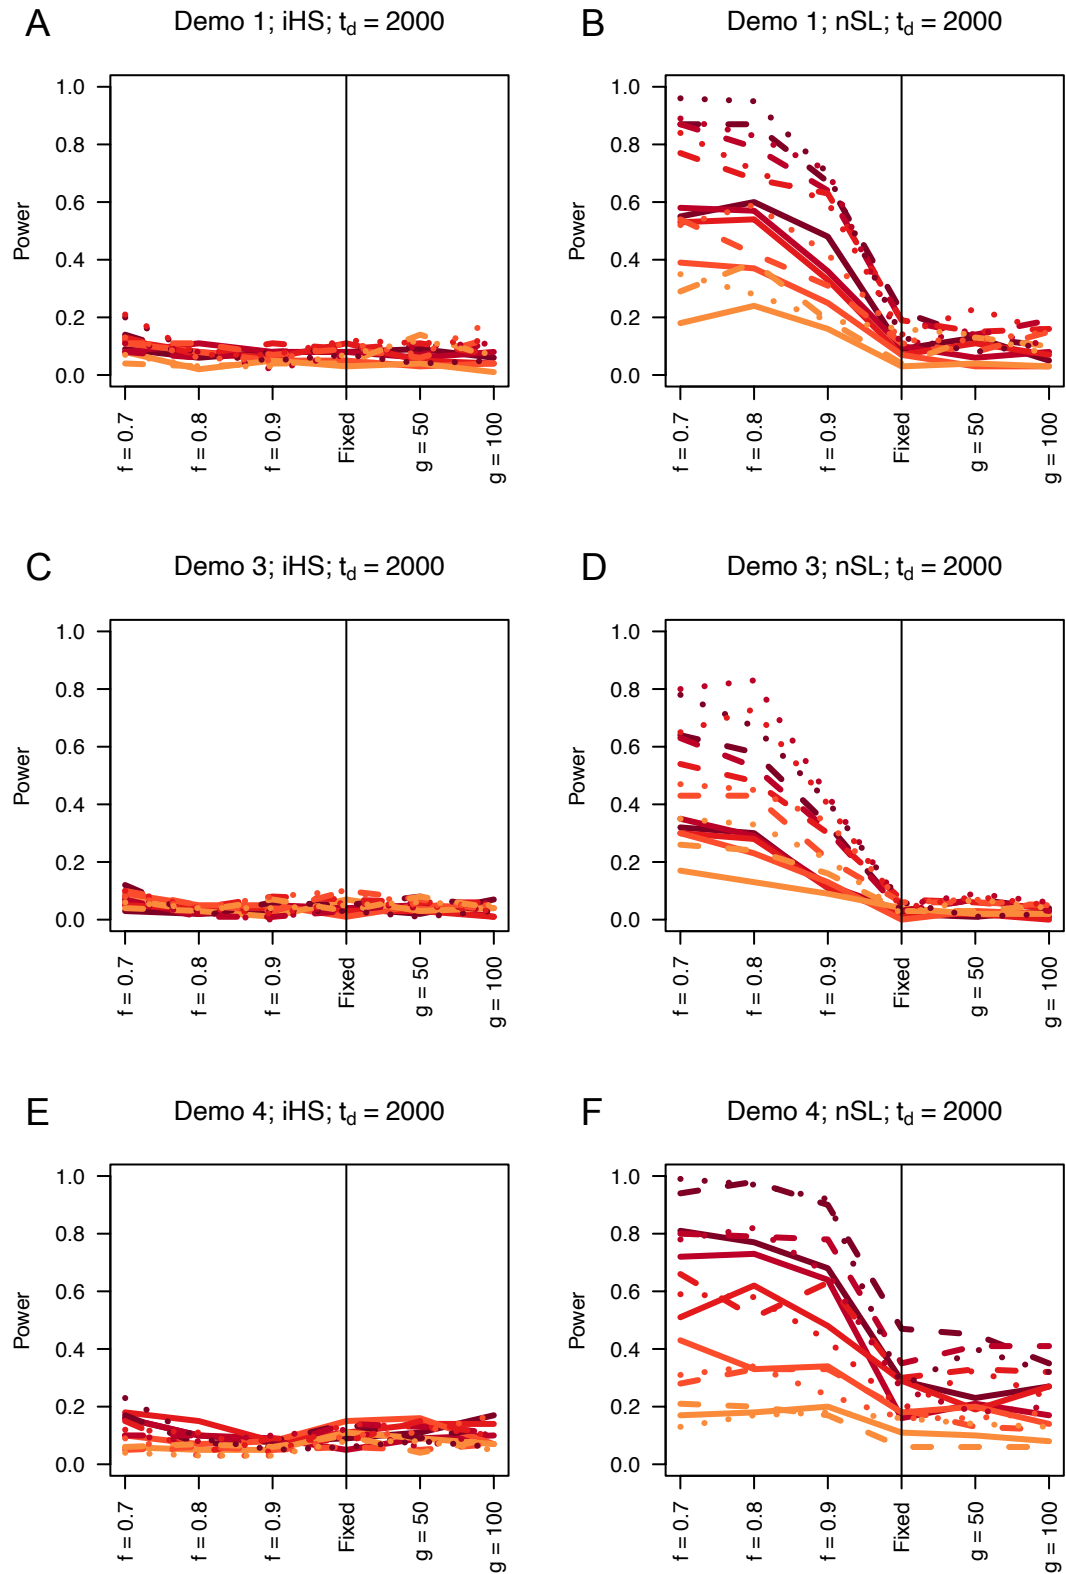

226 **Figure S19.** Power curves for unphased implementations of iHS (A, C, and E) and nSL (B, D, and F)  
227 under demographic histories Demo 1 (A and B), Demo 3 (C and D), and Demo 4 (E and F) with  $n = 50$   
228 diploid samples.  $s$  is the selection coefficient,  $f$  is the frequency of the adaptive allele at time of  
229 sampling,  $g$  is the number of generations at time of sampling since fixation,  $e$  is the frequency at which  
230 selection began, and  $t_d = 2000$  is the time in generations since the two populations diverged.

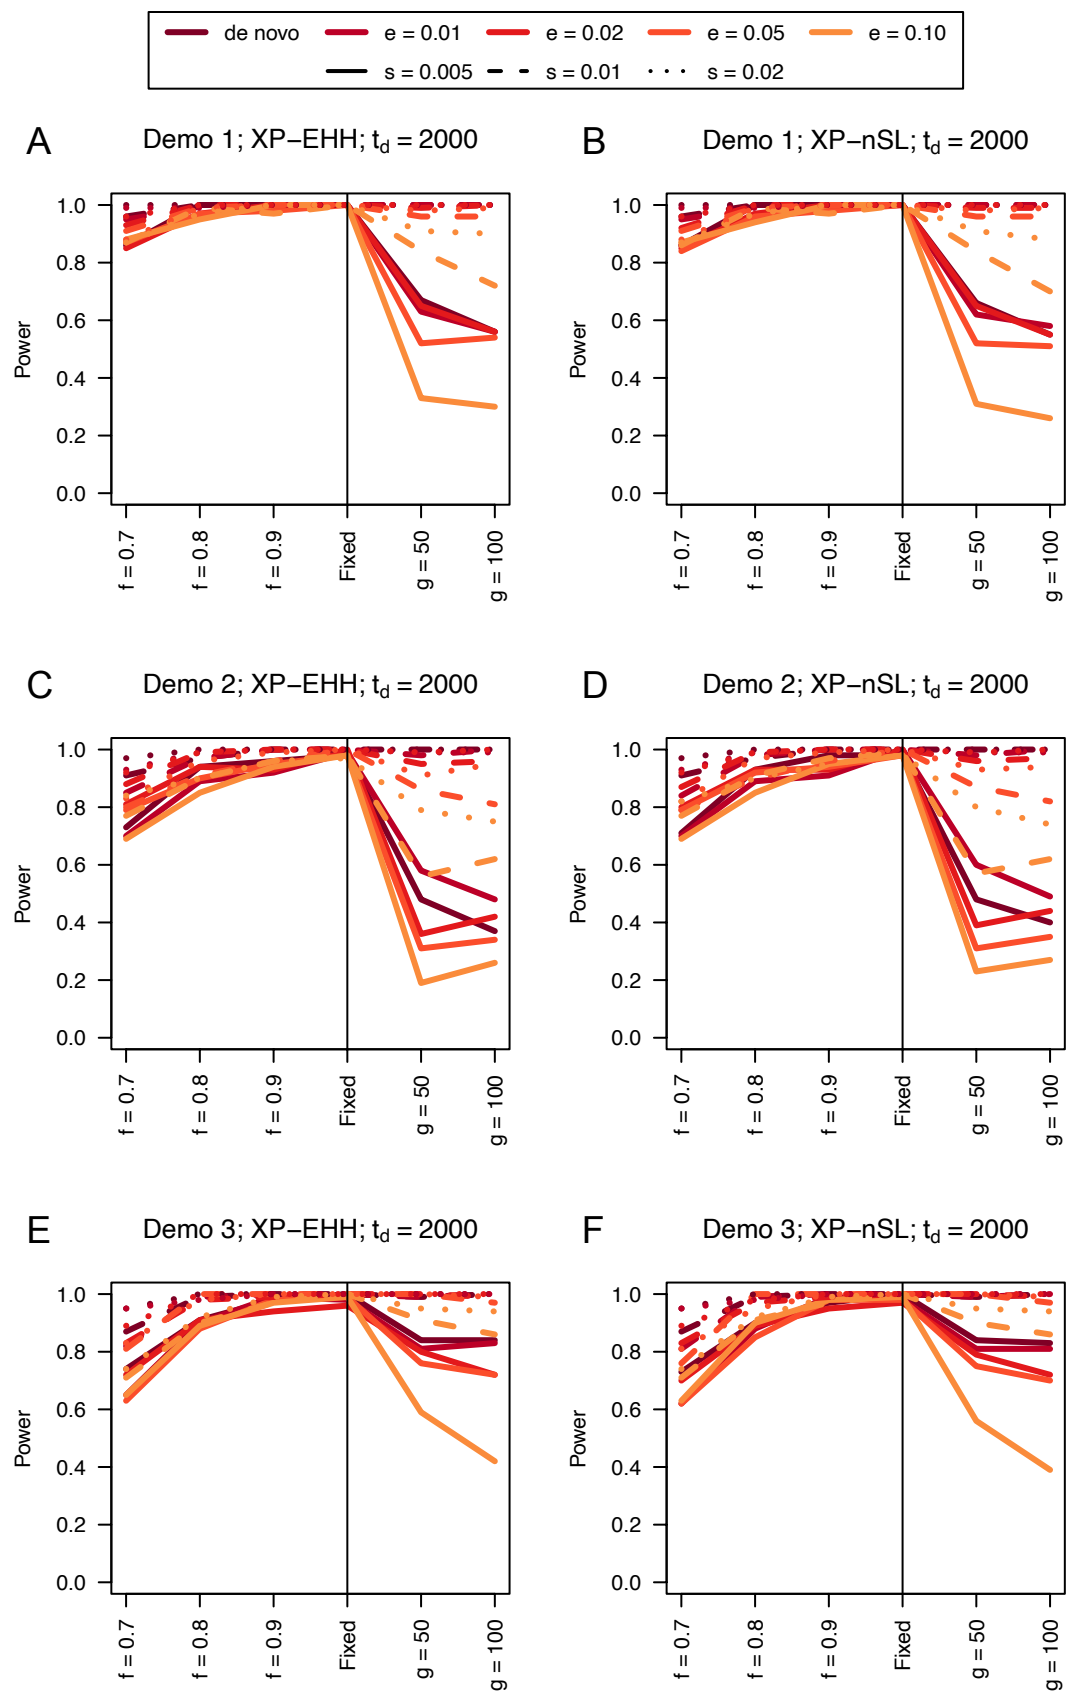

**Figure S20.** Power curves for unphased implementations of XP-EHH (A, C, and E) and XP-nSL (B, D, and F) under demographic histories Demo 1 (A and B), Demo 2 (C and D), and Demo 3 (E and F) with  $n = 50$  diploid samples from each population.  $s$  is the selection coefficient,  $f$  is the frequency of the adaptive allele at time of sampling,  $g$  is the number of generations at time of sampling since fixation,  $e$  is the frequency at which selection began, and  $t_d = 2000$  is the time in generations since the two populations diverged.

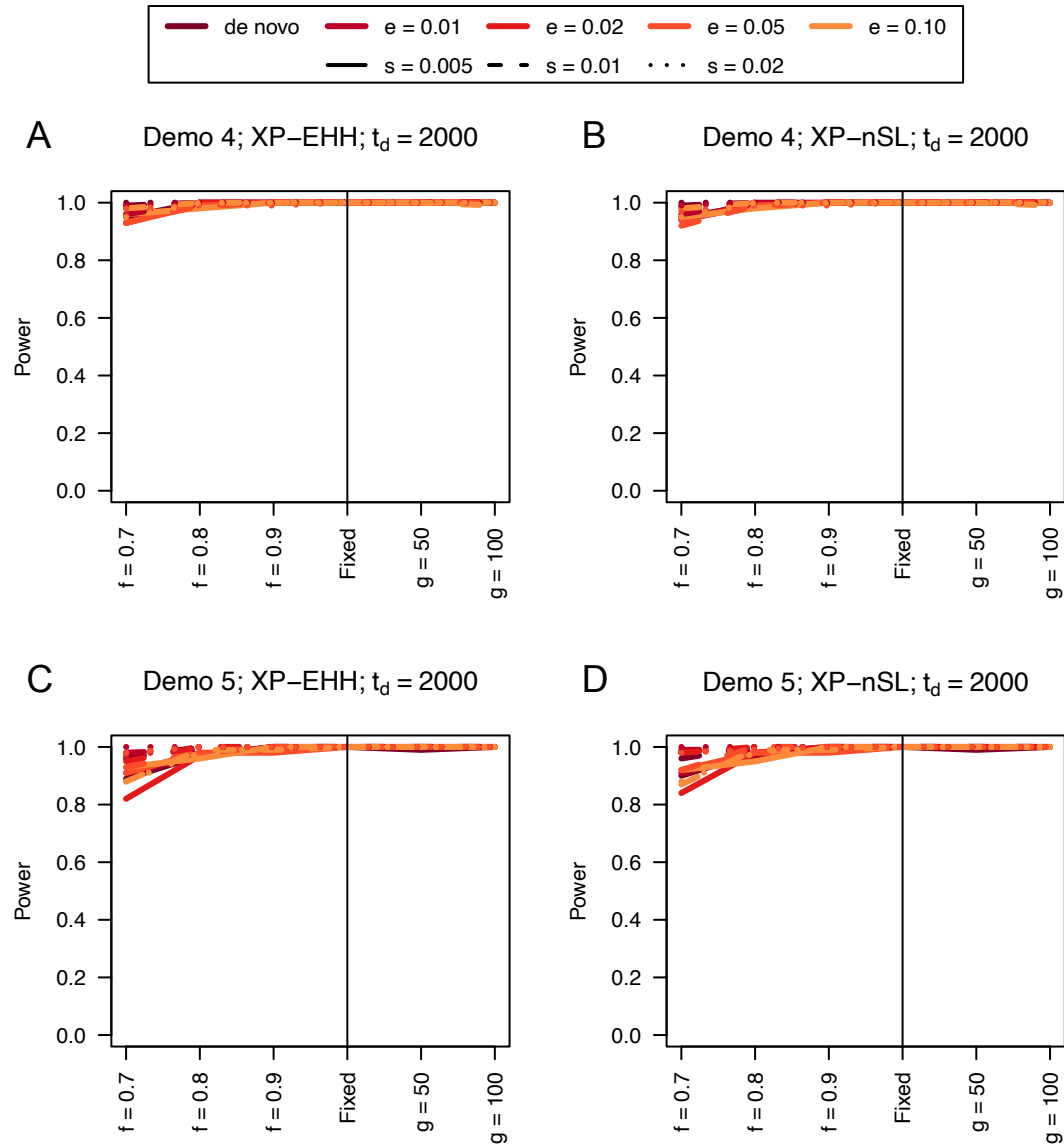

**Figure S21.** Power curves for unphased implementations of XP-EHH (A and C) and XP-nSL (B and D) under demographic histories Demo 4 (A and B), and Demo 5 (C and D) with  $n = 50$  diploid samples from each population.  $s$  is the selection coefficient,  $f$  is the frequency of the adaptive allele at time of sampling,  $g$  is the number of generations at time of sampling since fixation,  $e$  is the frequency at which selection began, and  $t_d = 2000$  is the time in generations since the two populations diverged.

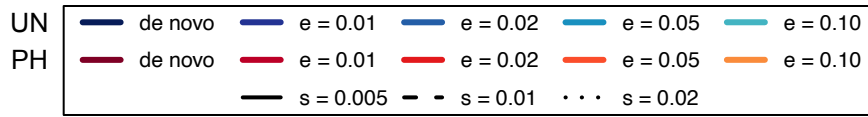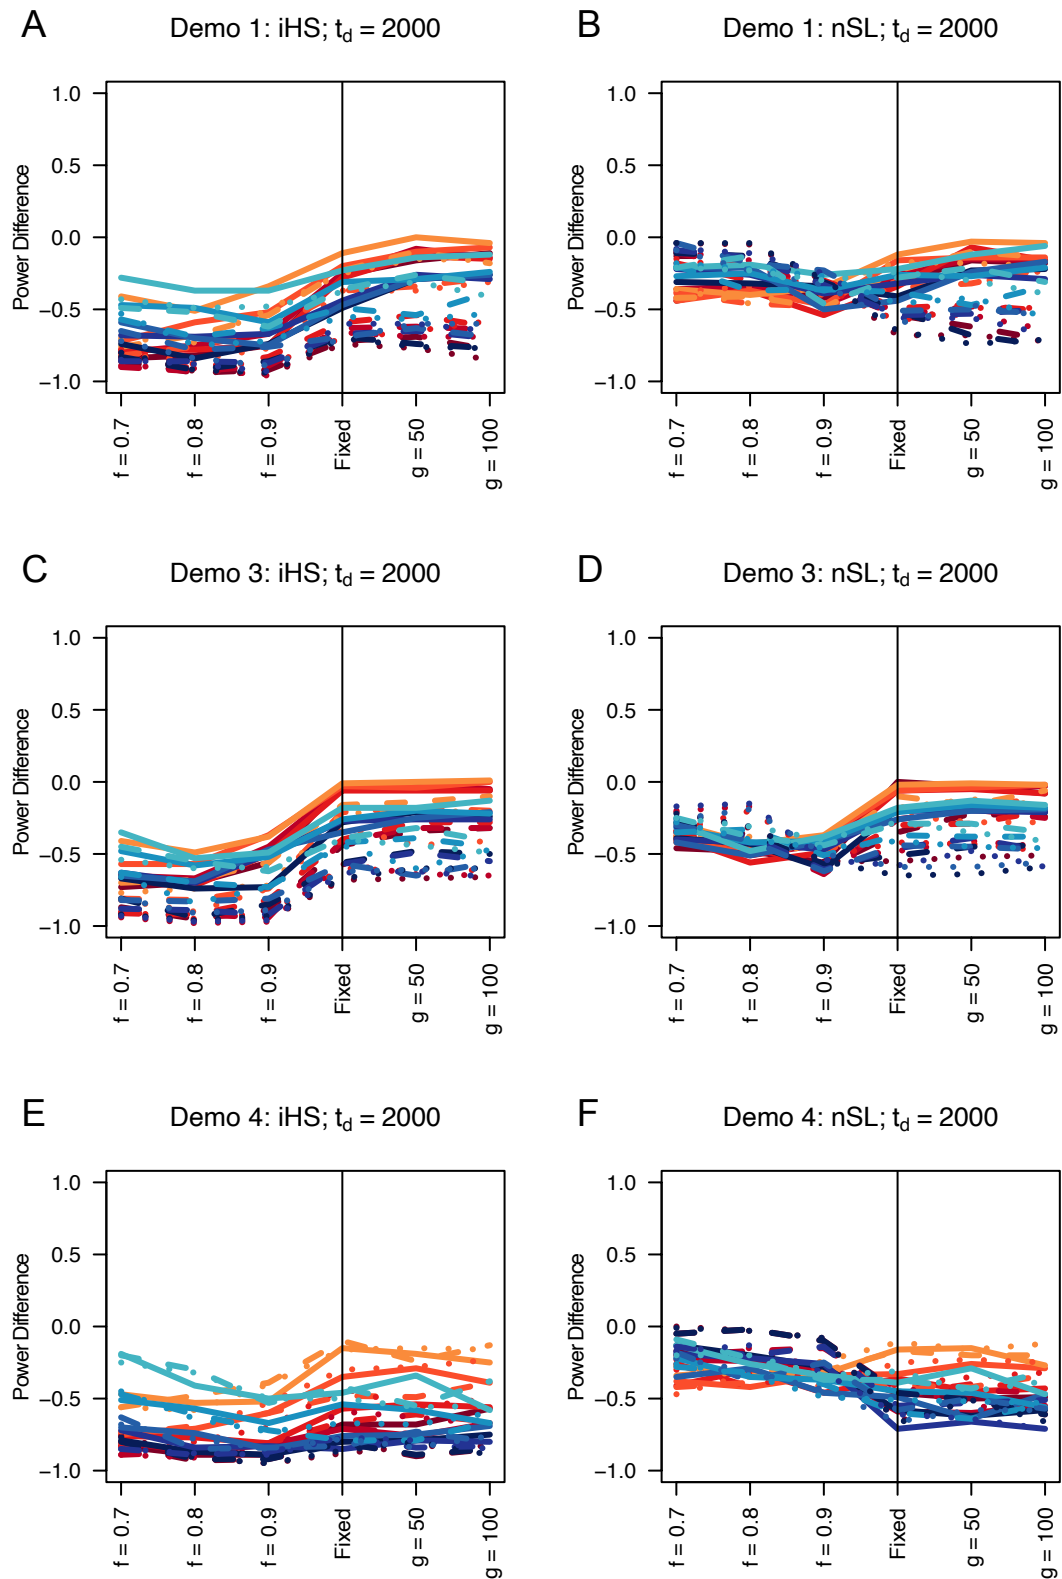

**Figure S22.** Power difference between unphased implementations of iHS (A, C, and E) and nSL (B, D, and F) and phased implementations. Blue curves represent the power difference between the unphased and phased statistics when applied to unphased data (UN). Red curves represent the power difference between the unphased and phased statistics when applied to perfectly phased data (PH). Values greater than 0 indicate the unphased statistic had higher power. Applied to demographic histories Demo 1 (A and B), Demo 3 (C and D), and Demo 4 (E and F) with  $n = 50$  diploid samples.  $s$  is the selection coefficient,  $f$  is the frequency of the adaptive allele at time of sampling,  $g$  is the number of generations at time of sampling since fixation,  $e$  is the frequency at which selection began, and  $t_d = 2000$  is the time in generations since the two populations diverged.

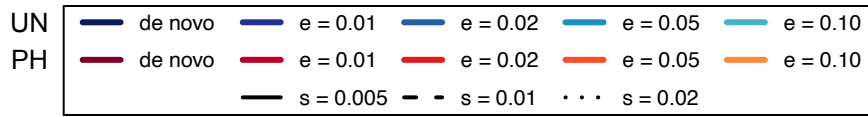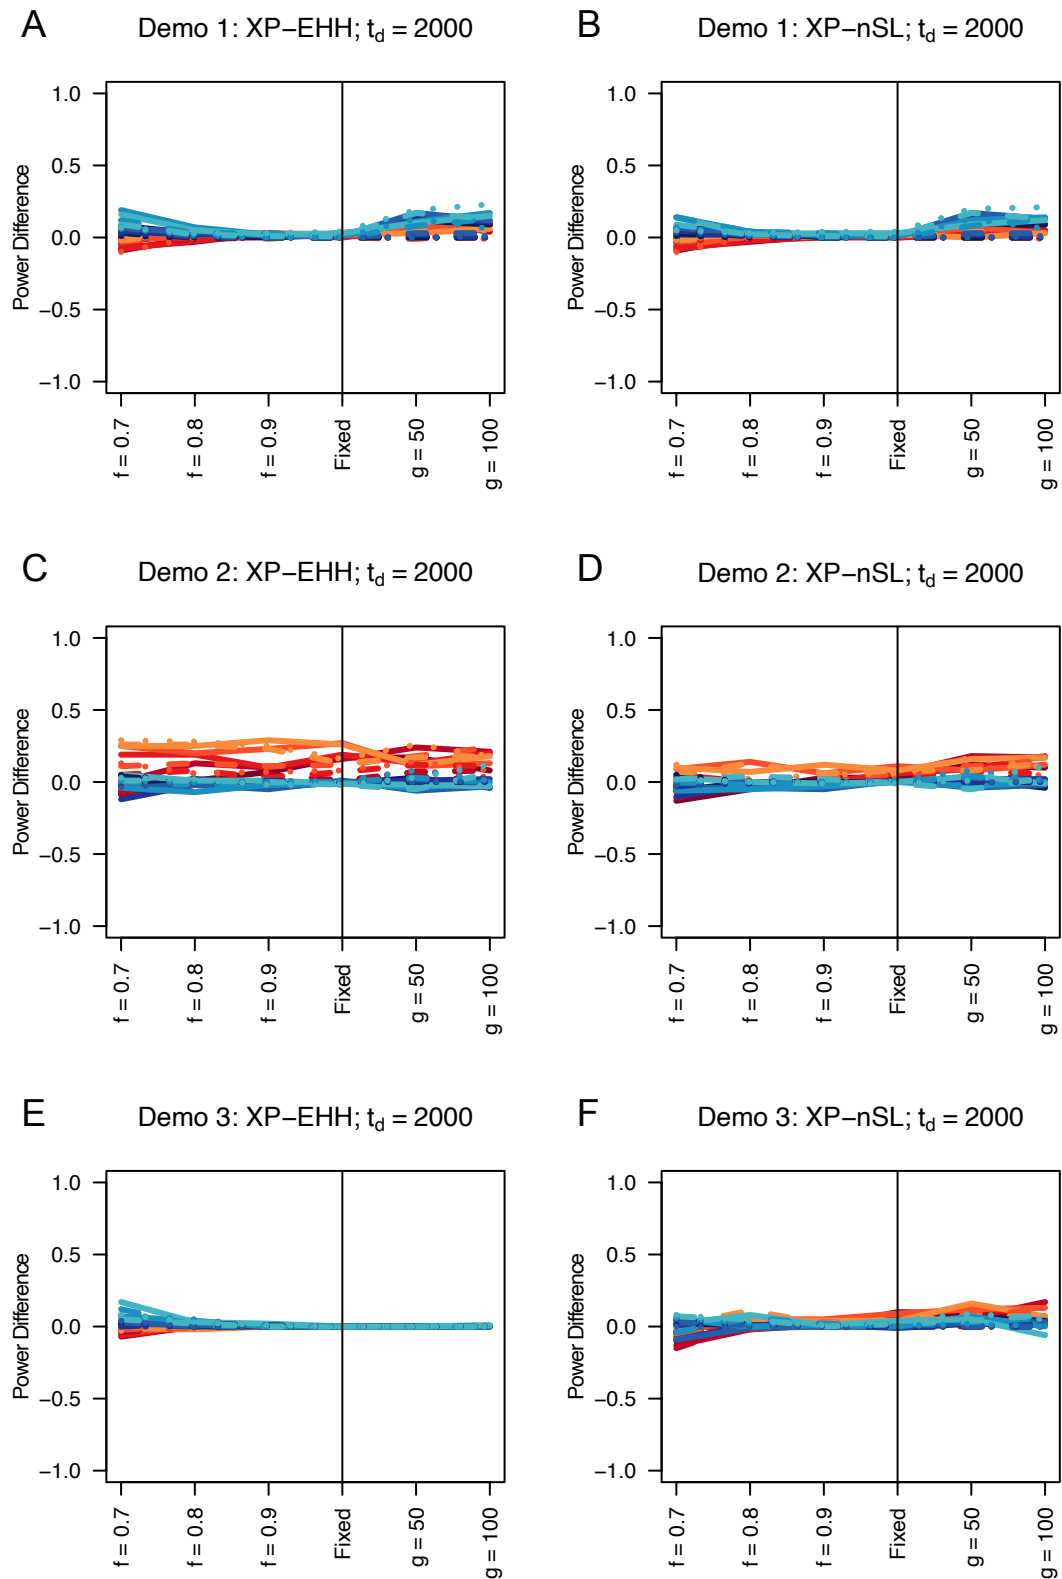

**Figure S23.** Power difference between unphased implementations of XP-EHH (A, C, and E) and XP-nSL (B, D, and F) and phased implementations. Blue curves represent the power difference between the unphased and phased statistics when applied to unphased data (UN). Red curves represent the power difference between the unphased and phased statistics when applied to perfectly phased data (PH). Values greater than 0 indicate the unphased statistic had higher power. Applied to demographic histories Demo 1 (A and B), Demo 2 (C and D), and Demo 3 (E and F) with  $n = 50$  diploid samples from each population.  $s$  is the selection coefficient,  $f$  is the frequency of the adaptive allele at time of sampling,  $g$  is the number of generations at time of sampling since fixation,  $e$  is the frequency at which selection began, and  $t_d = 2000$  is the time in generations since the two populations diverged.

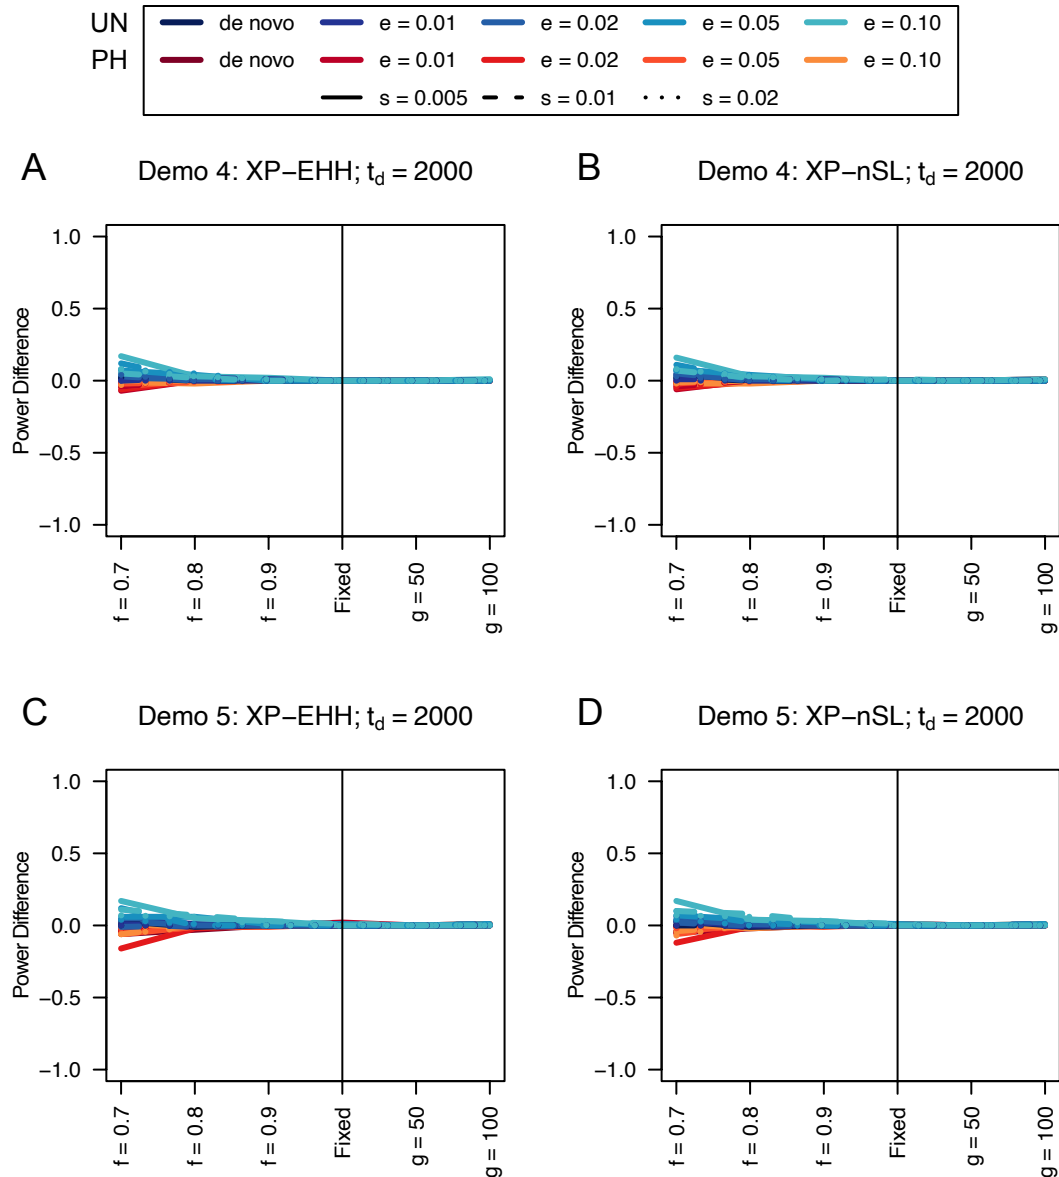

**Figure S24.** Power difference between unphased implementations of XP-EHH (A and C) and XP-nSL (B and D) and phased implementations. Blue curves represent the power difference between the unphased and phased statistics when applied to unphased data (UN). Red curves represent the power difference between the unphased and phased statistics when applied to perfectly phased data (PH). Values greater than 0 indicate the unphased statistic had higher power. Applied to demographic histories Demo 4 (A and B), and Demo 5 (C and D) with  $n = 50$  diploid samples from each population.  $s$  is the selection coefficient,  $f$  is the frequency of the adaptive allele at time of sampling,  $g$  is the number of generations at time of sampling since fixation,  $e$  is the frequency at which selection began, and  $t_d = 2000$  is the time in generations since the two populations diverged.

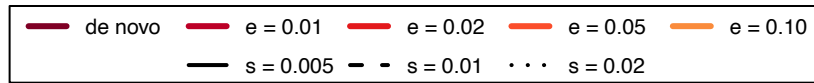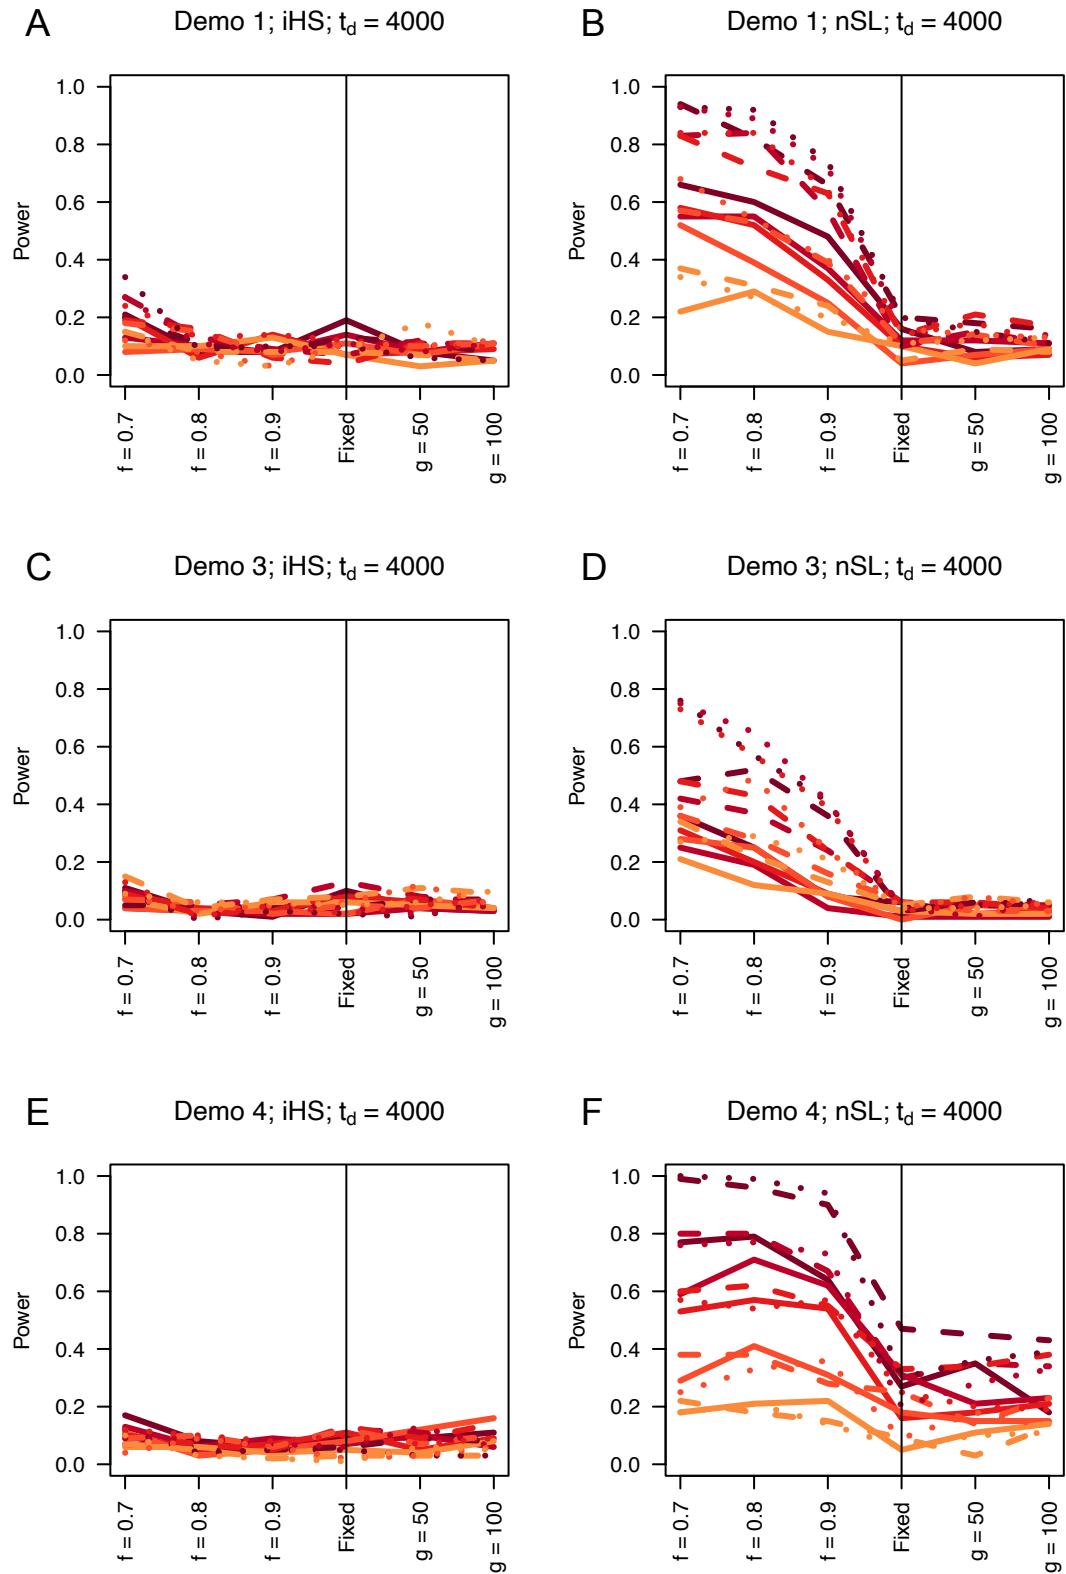

295 **Figure S25.** Power curves for unphased implementations of iHS (A, C, and E) and nSL (B, D, and F)  
296 under demographic histories Demo 1 (A and B), Demo 3 (C and D), and Demo 4 (E and F) with  $n = 50$   
297 diploid samples.  $s$  is the selection coefficient,  $f$  is the frequency of the adaptive allele at time of  
298 sampling,  $g$  is the number of generations at time of sampling since fixation,  $e$  is the frequency at which  
299 selection began, and  $t_d = 4000$  is the time in generations since the two populations diverged.

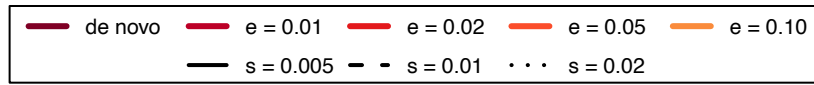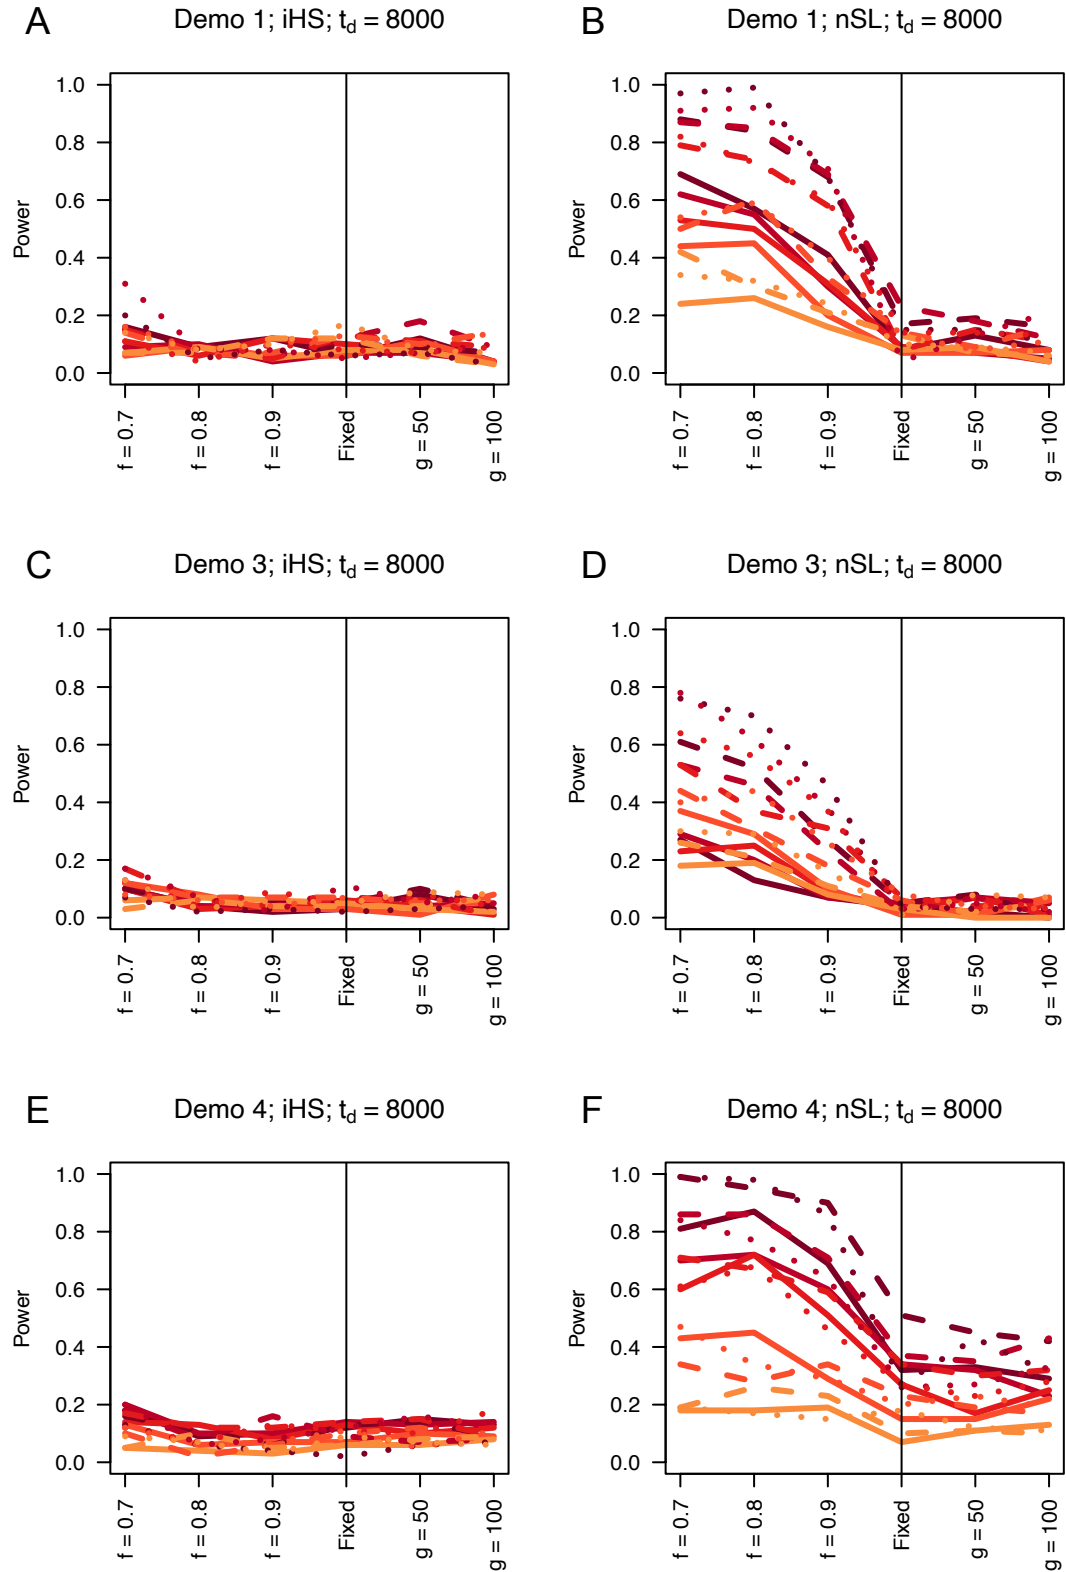

301 **Figure S26.** Power curves for unphased implementations of iHS (A, C, and E) and nSL (B, D, and F)  
302 under demographic histories Demo 1 (A and B), Demo 3 (C and D), and Demo 4 (E and F) with  $n = 50$   
303 diploid samples.  $s$  is the selection coefficient,  $f$  is the frequency of the adaptive allele at time of  
304 sampling,  $g$  is the number of generations at time of sampling since fixation,  $e$  is the frequency at which  
305 selection began, and  $t_d = 8000$  is the time in generations since the two populations diverged.

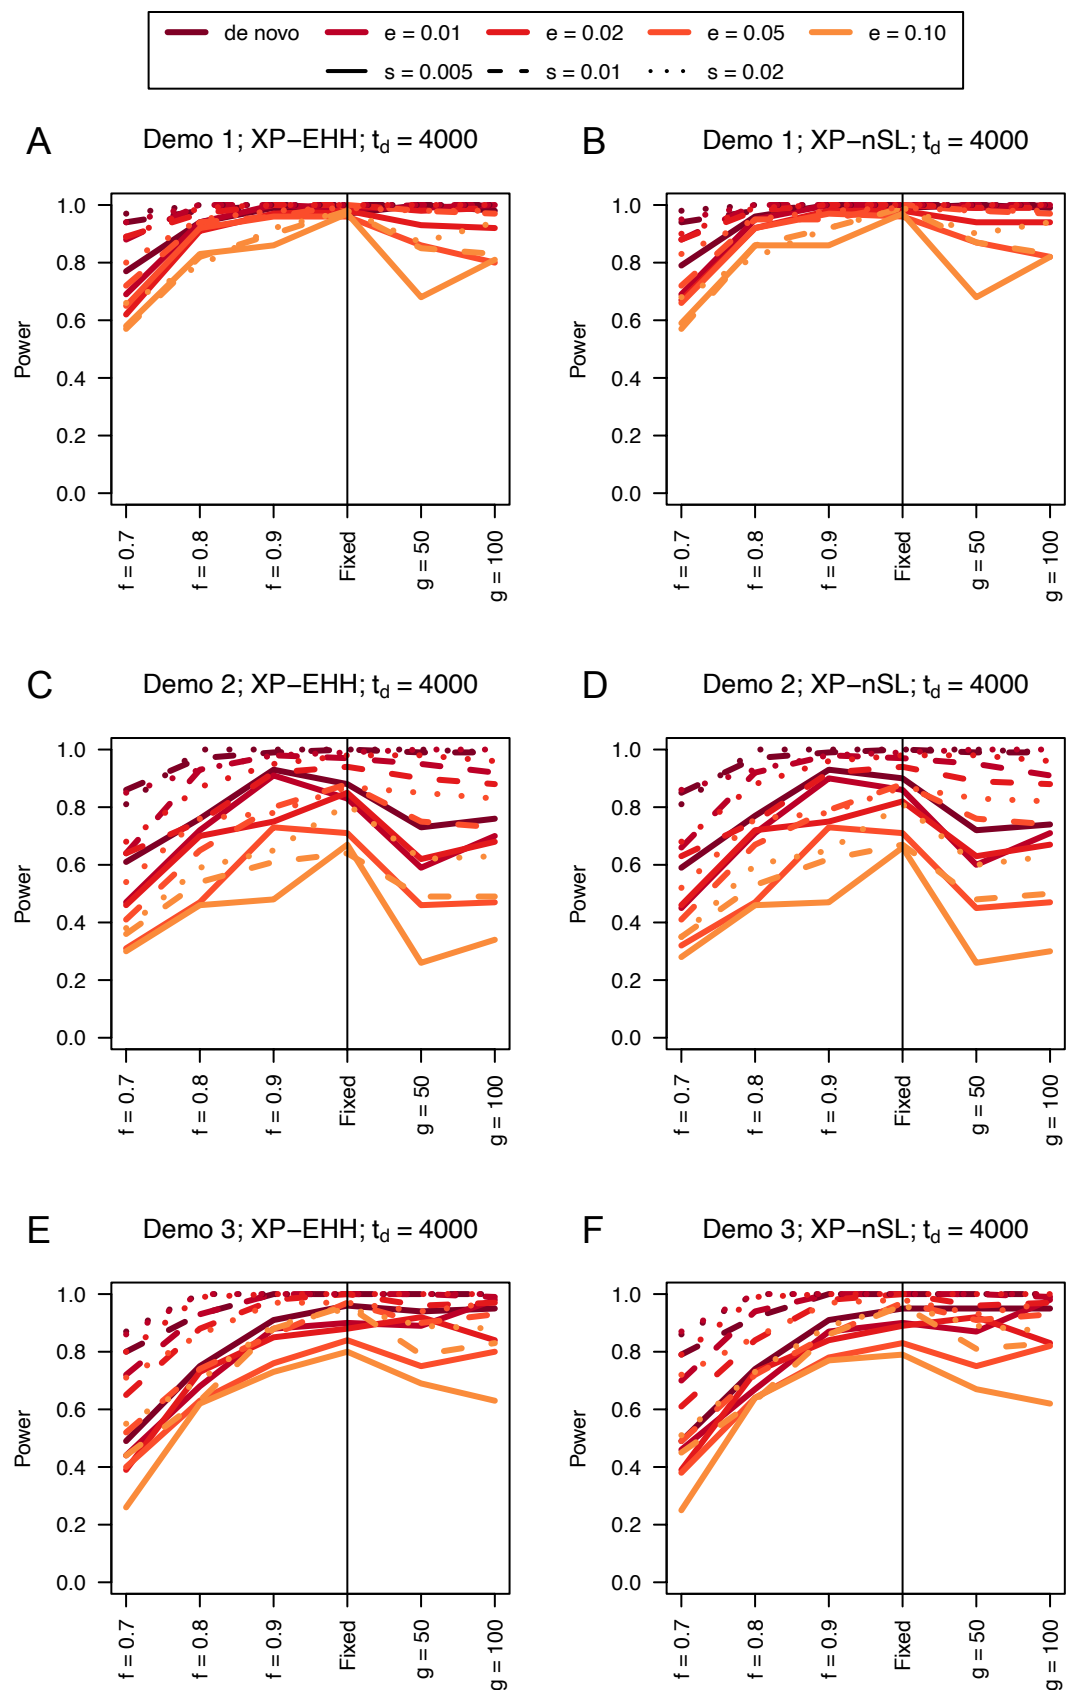

**Figure S27.** Power difference between unphased implementations of XP-EHH (A, C, and E) and XP-nSL (B, D, and F) and phased implementations. Blue curves represent the power difference between the unphased and phased statistics when applied to unphased data (UN). Red curves represent the power difference between the unphased and phased statistics when applied to perfectly phased data (PH). Values greater than 0 indicate the unphased statistic had higher power. Applied to demographic histories Demo 1 (A and B), Demo 2 (C and D), and Demo 3 (E and F) with  $n = 50$  diploid samples from each population.  $s$  is the selection coefficient,  $f$  is the frequency of the adaptive allele at time of sampling,  $g$  is the number of generations at time of sampling since fixation,  $e$  is the frequency at which selection began, and  $t_d = 4000$  is the time in generations since the two populations diverged.

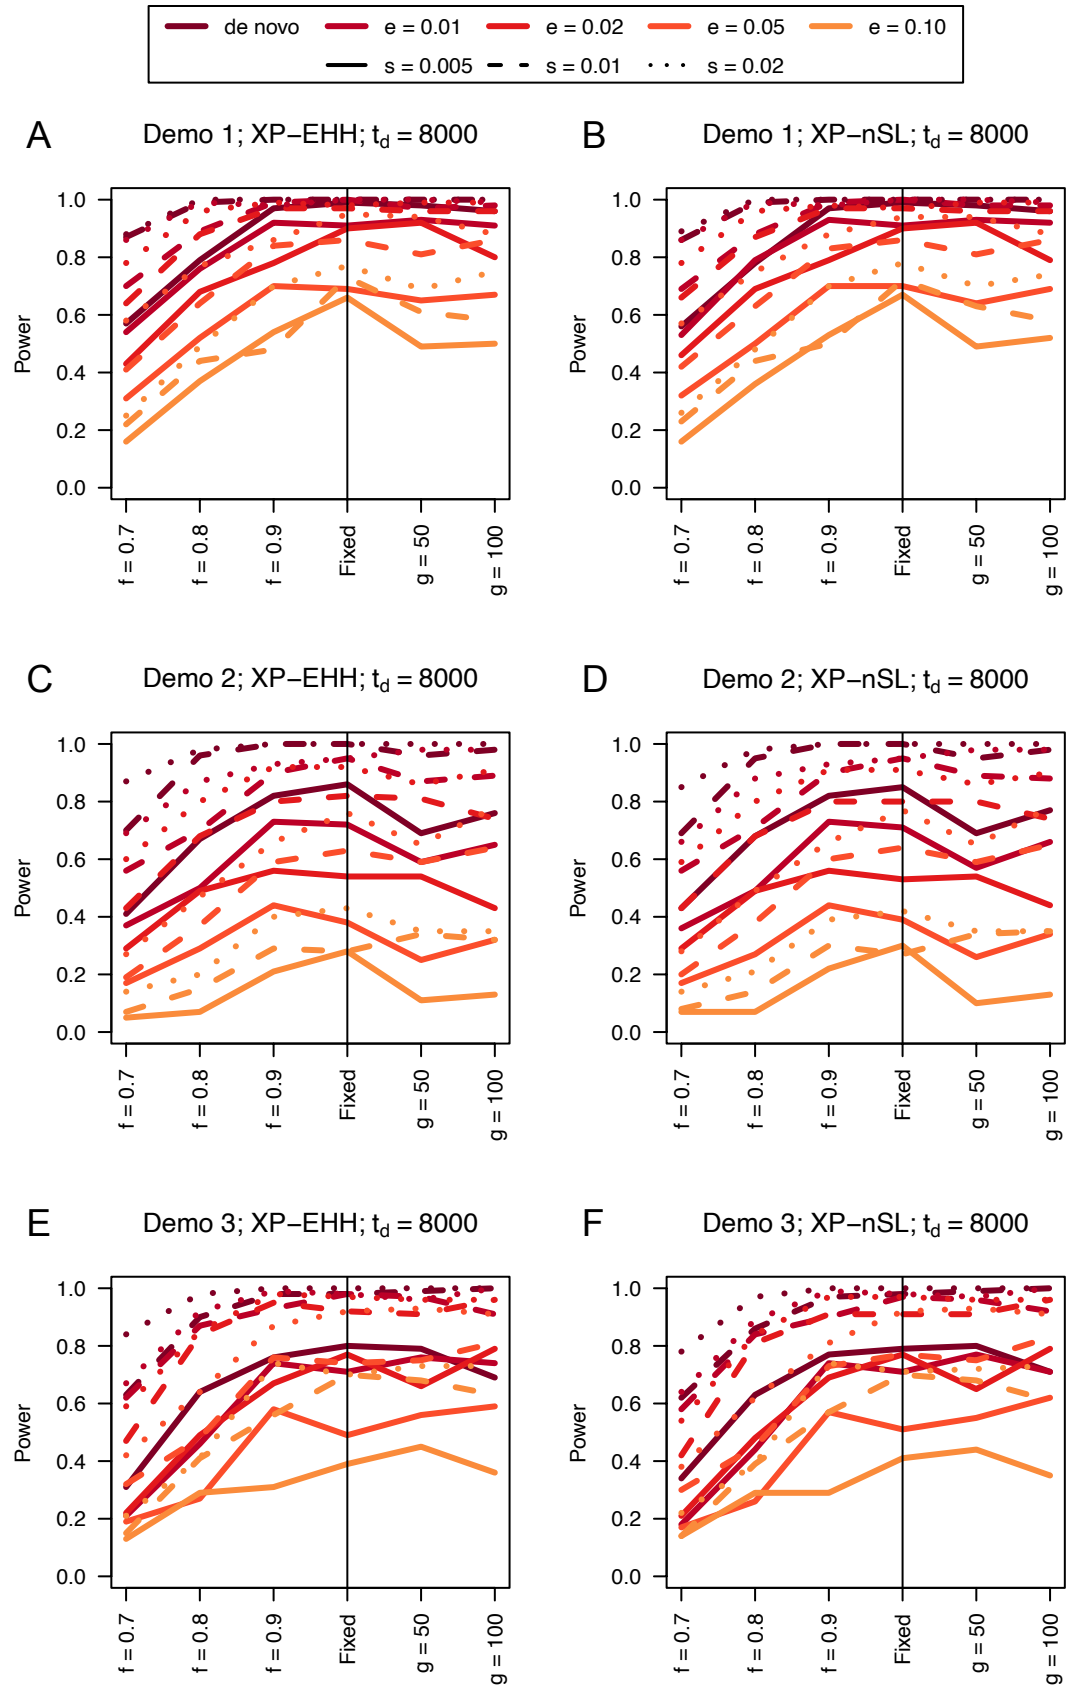

**Figure S28.** Power difference between unphased implementations of XP-EHH (A, C, and E) and XP-nSL (B, D, and F) and phased implementations. Blue curves represent the power difference between the unphased and phased statistics when applied to unphased data (UN). Red curves represent the power difference between the unphased and phased statistics when applied to perfectly phased data (PH). Values greater than 0 indicate the unphased statistic had higher power. Applied to demographic histories Demo 1 (A and B), Demo 2 (C and D), and Demo 3 (E and F) with  $n = 50$  diploid samples from each population.  $s$  is the selection coefficient,  $f$  is the frequency of the adaptive allele at time of sampling,  $g$  is the number of generations at time of sampling since fixation,  $e$  is the frequency at which selection began, and  $t_d = 8000$  is the time in generations since the two populations diverged.

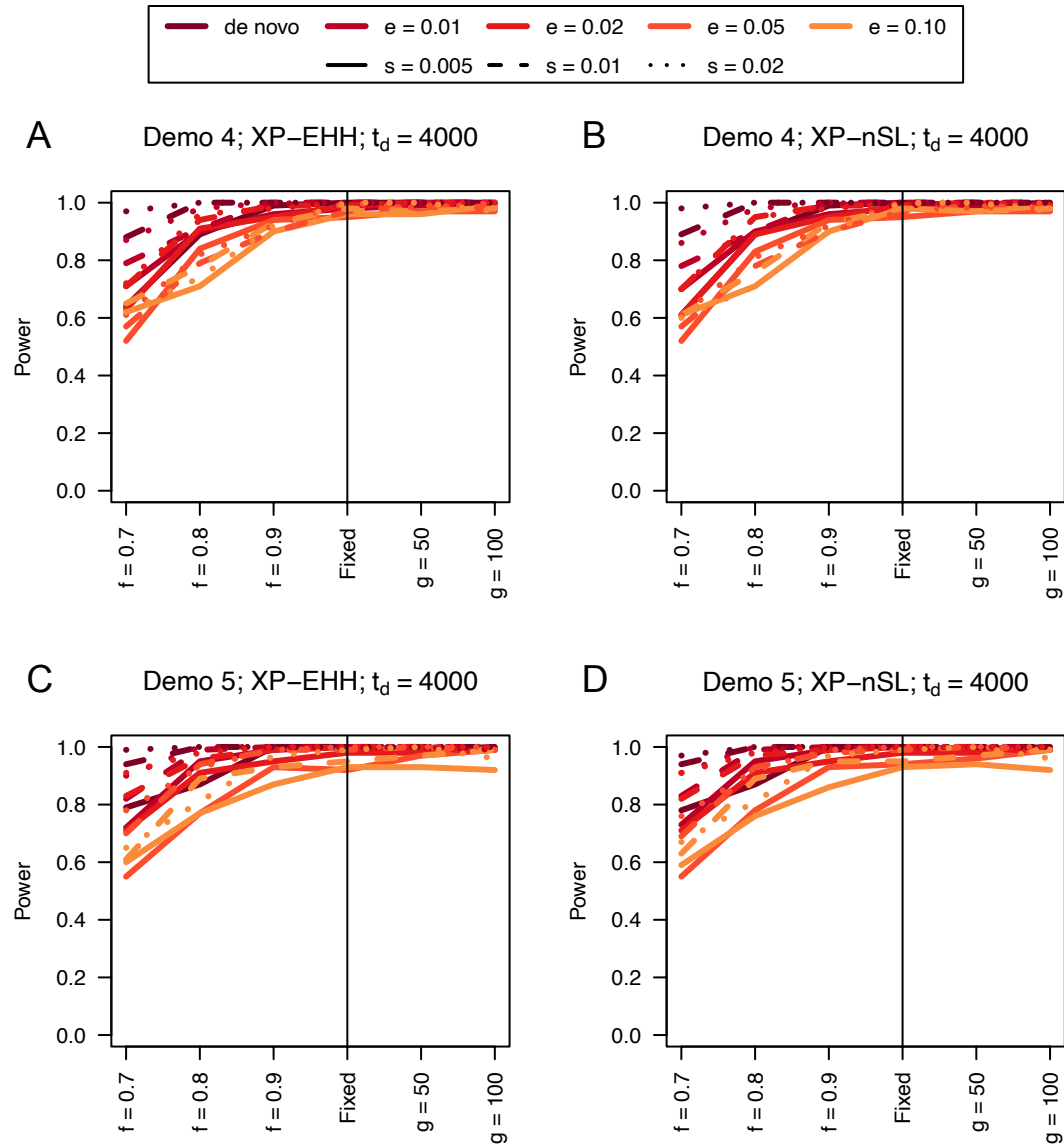

**Figure S29.** Power curves for unphased implementations of XP-EHH (A and C) and XP-nSL (B and D) under demographic histories Demo 4 (A and B), and Demo 5 (C and D) with  $n = 50$  diploid samples from each population.  $s$  is the selection coefficient,  $f$  is the frequency of the adaptive allele at time of sampling,  $g$  is the number of generations at time of sampling since fixation,  $e$  is the frequency at which selection began, and  $t_d = 4000$  is the time in generations since the two populations diverged.

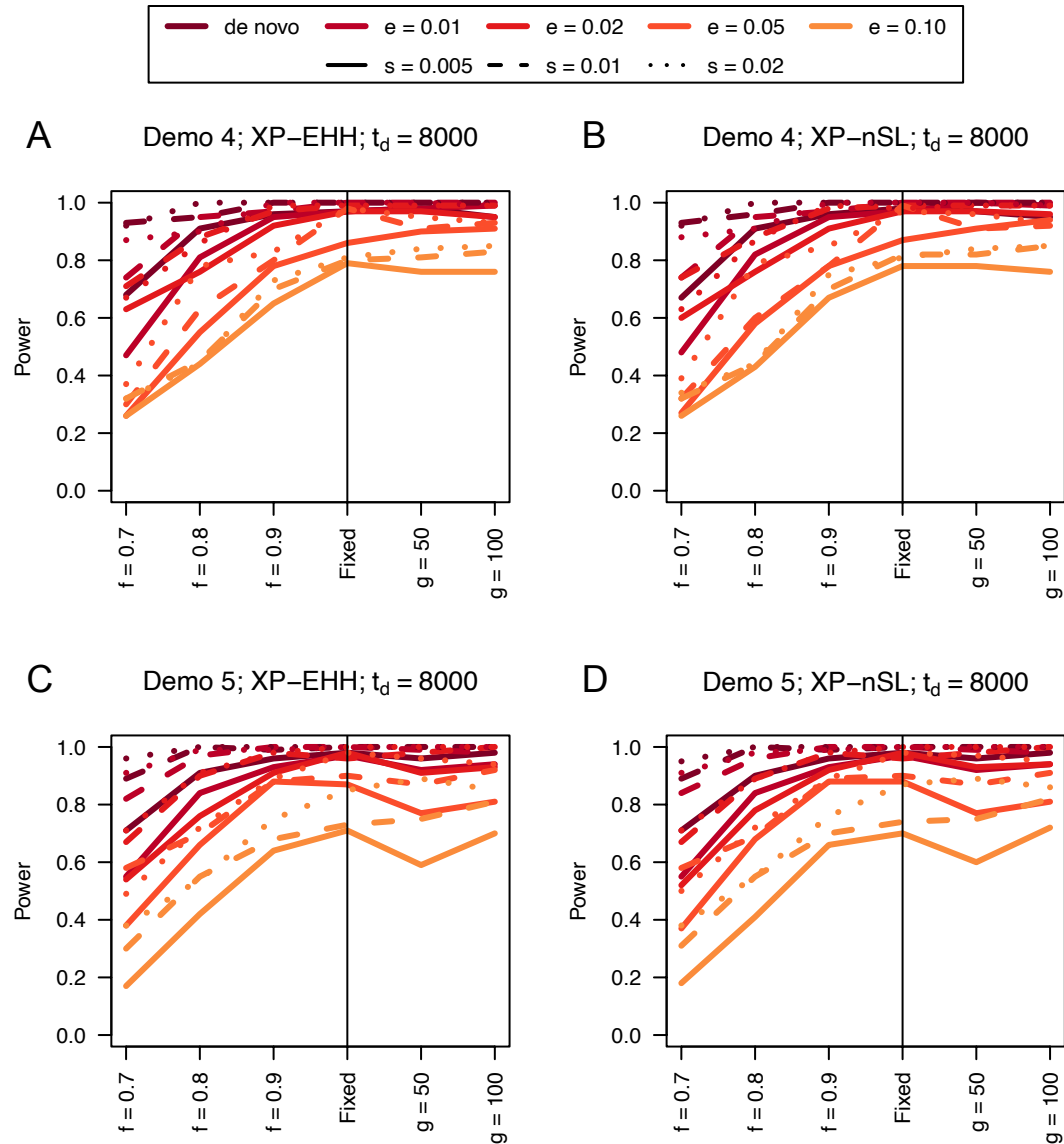

**Figure S30.** Power curves for unphased implementations of XP-EHH (A and C) and XP-nSL (B and D) under demographic histories Demo 4 (A and B), and Demo 5 (C and D) with  $n = 50$  diploid samples from each population.  $s$  is the selection coefficient,  $f$  is the frequency of the adaptive allele at time of sampling,  $g$  is the number of generations at time of sampling since fixation,  $e$  is the frequency at which selection began, and  $t_d = 8000$  is the time in generations since the two populations diverged.

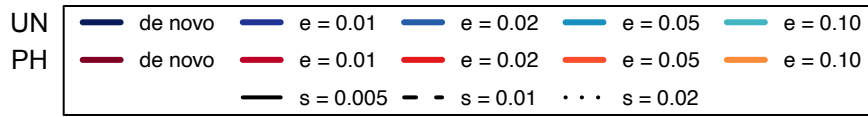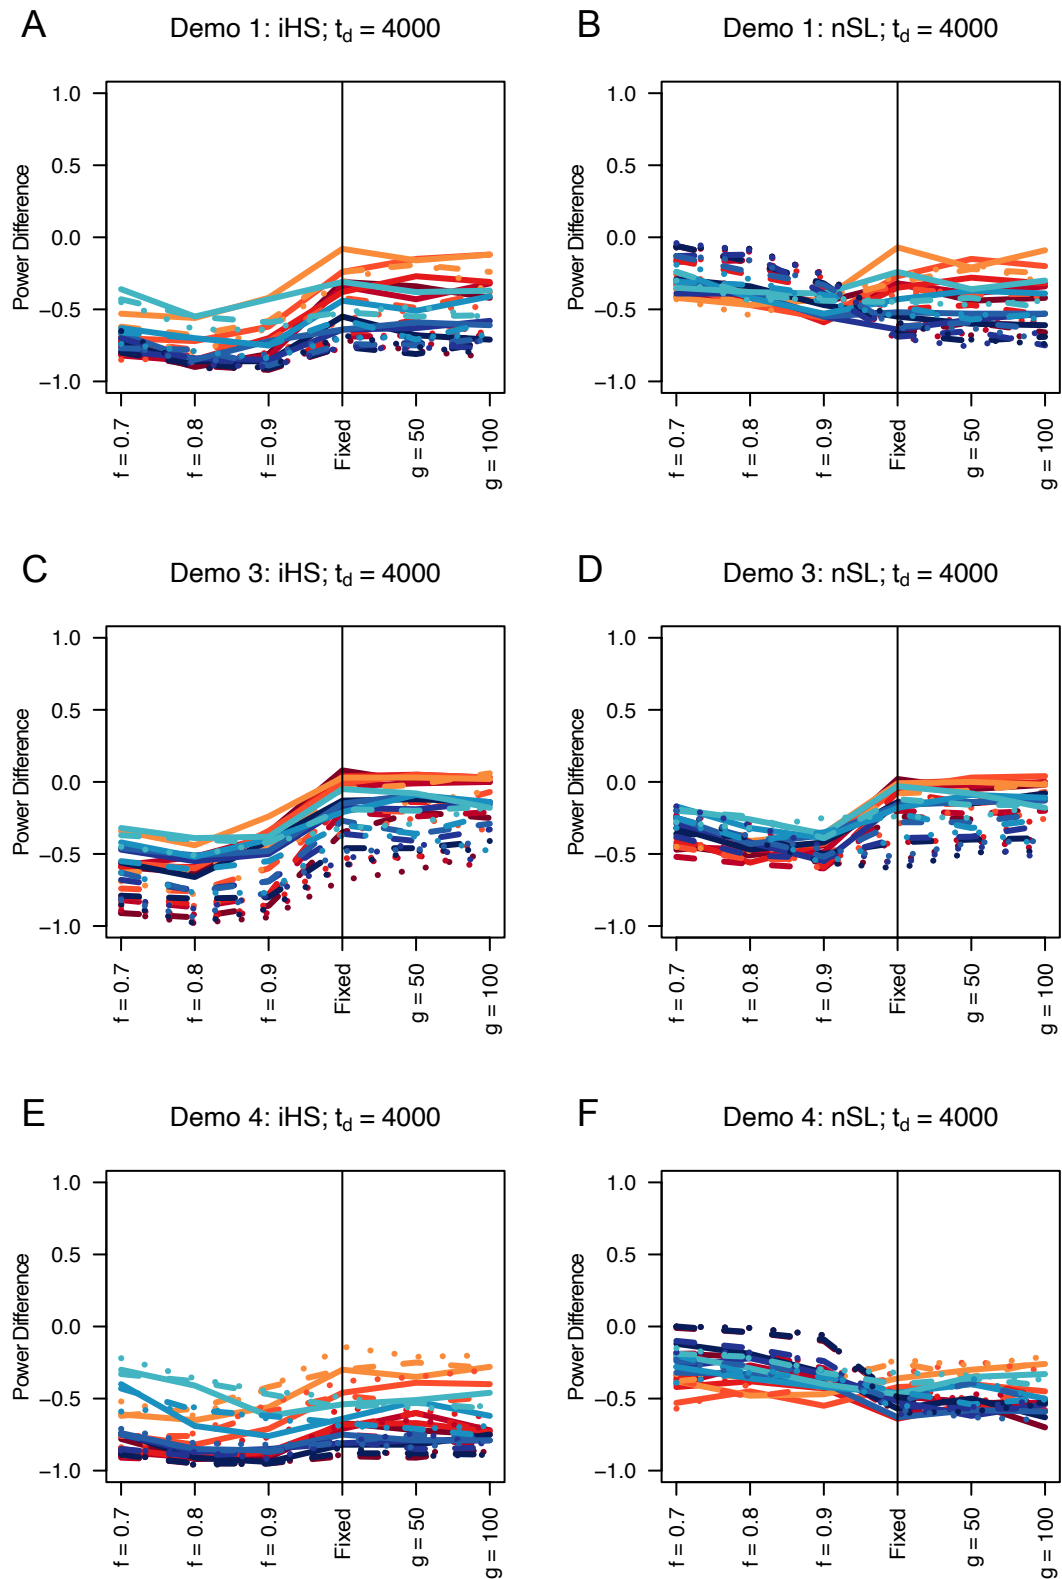

**Figure S31.** Power difference between unphased implementations of iHS (A, C, and E) and nSL (B, D, and F) and phased implementations. Blue curves represent the power difference between the unphased and phased statistics when applied to unphased data (UN). Red curves represent the power difference between the unphased and phased statistics when applied to perfectly phased data (PH). Values greater than 0 indicate the unphased statistic had higher power. Applied to demographic histories Demo 1 (A and B), Demo 3 (C and D), and Demo 4 (E and F) with  $n = 50$  diploid samples.  $s$  is the selection coefficient,  $f$  is the frequency of the adaptive allele at time of sampling,  $g$  is the number of generations at time of sampling since fixation,  $e$  is the frequency at which selection began, and  $t_d = 4000$  is the time in generations since the two populations diverged.

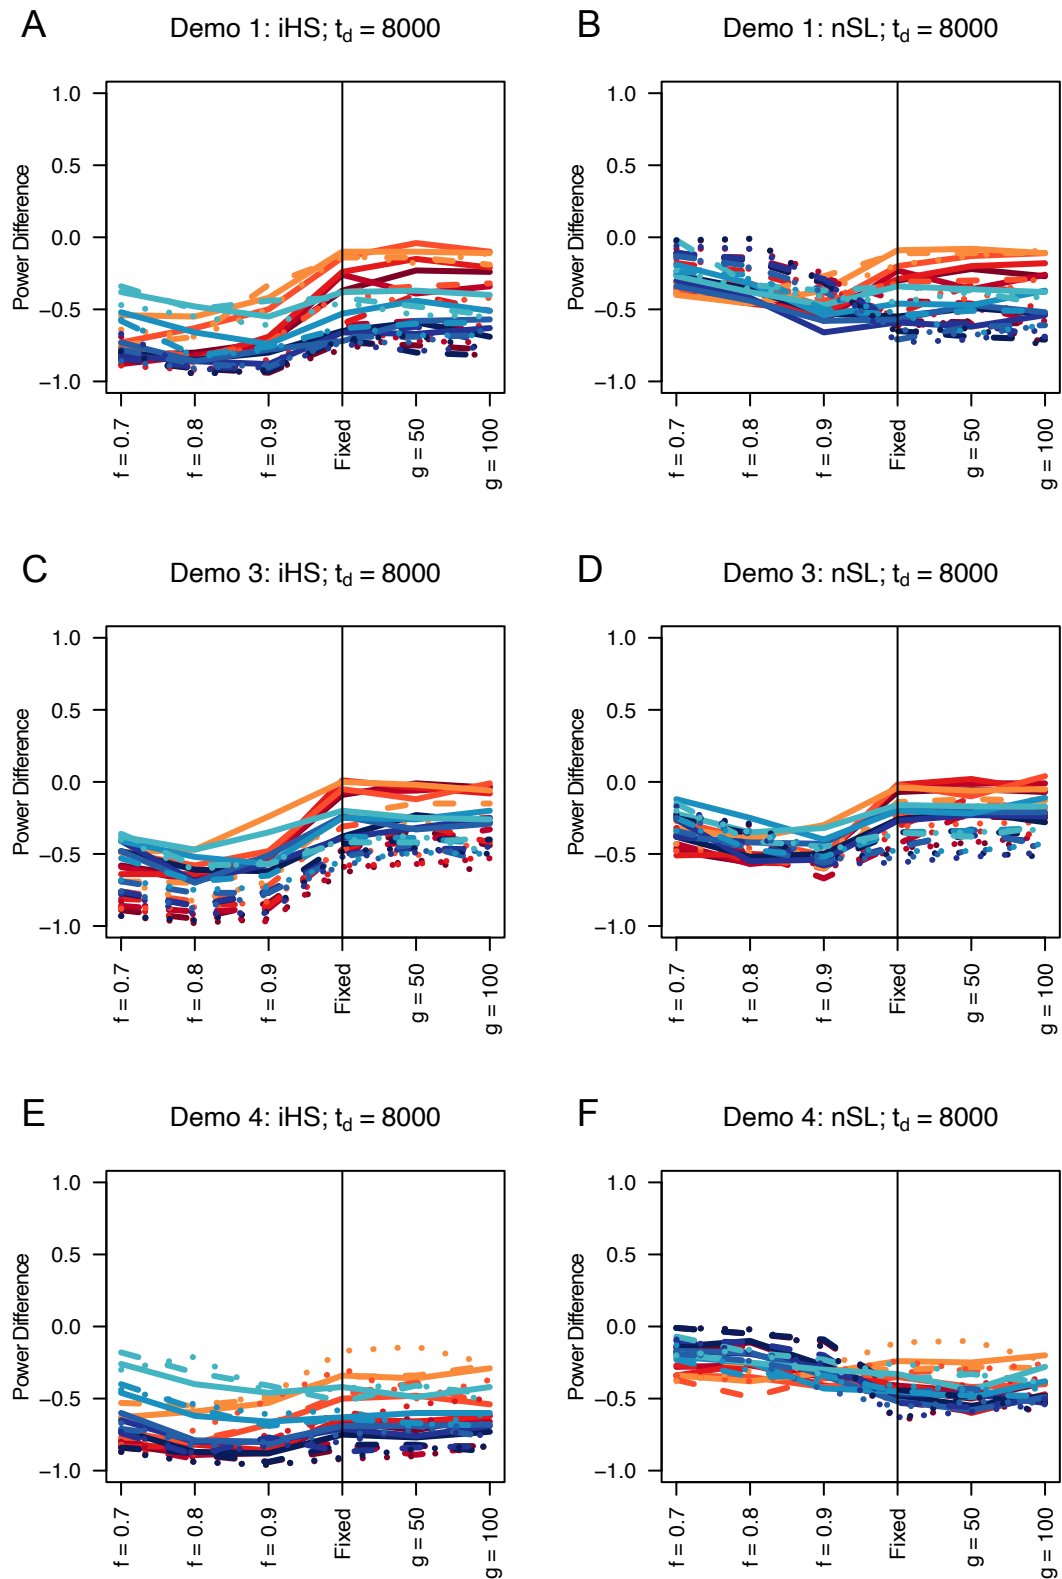

**Figure S32.** Power difference between unphased implementations of iHS (A, C, and E) and nSL (B, D, and F) and phased implementations. Blue curves represent the power difference between the unphased and phased statistics when applied to unphased data (UN). Red curves represent the power difference between the unphased and phased statistics when applied to perfectly phased data (PH). Values greater than 0 indicate the unphased statistic had higher power. Applied to demographic histories Demo 1 (A and B), Demo 3 (C and D), and Demo 4 (E and F) with  $n = 50$  diploid samples.  $s$  is the selection coefficient,  $f$  is the frequency of the adaptive allele at time of sampling,  $g$  is the number of generations at time of sampling since fixation,  $e$  is the frequency at which selection began, and  $t_d = 8000$  is the time in generations since the two populations diverged.



**A** Demo 1: XP-EHH;  $t_d = 4000$

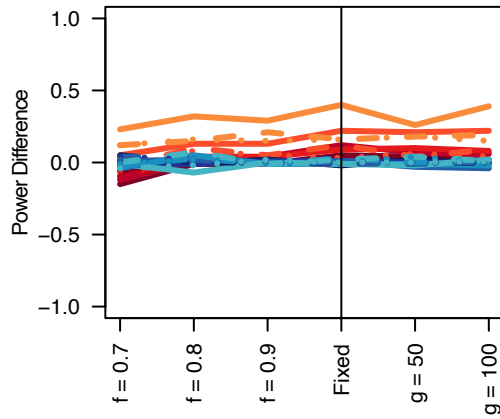

**B** Demo 1: XP-nSL;  $t_d = 4000$

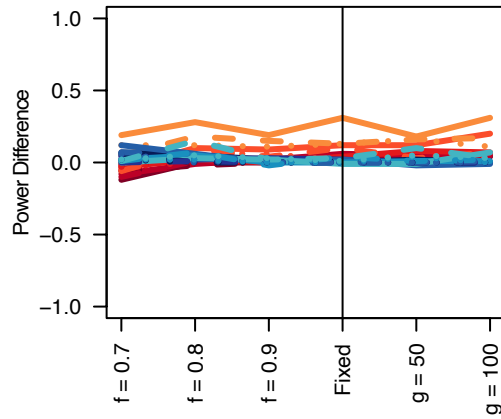

**C** Demo 2: XP-EHH;  $t_d = 4000$

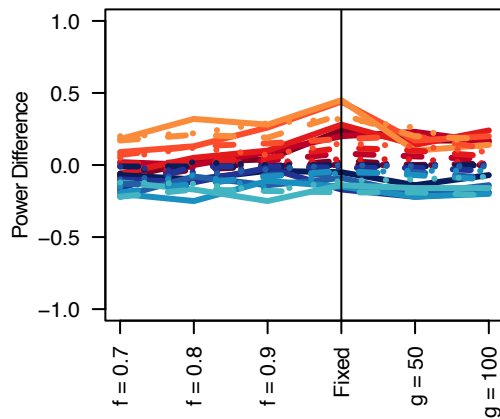

**D** Demo 2: XP-nSL;  $t_d = 4000$

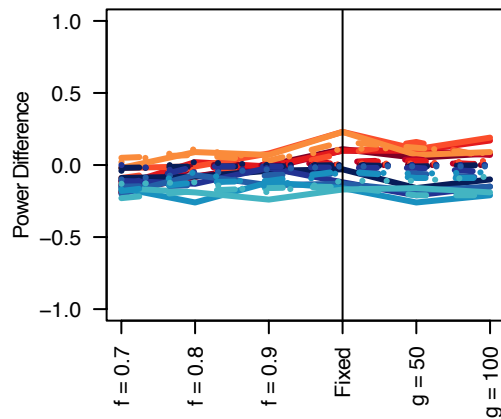

**E** Demo 3: XP-EHH;  $t_d = 4000$

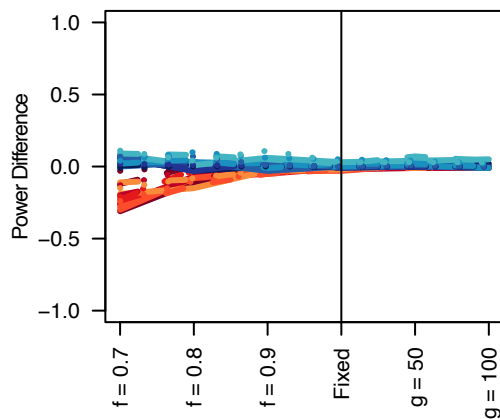

**F** Demo 3: XP-nSL;  $t_d = 4000$

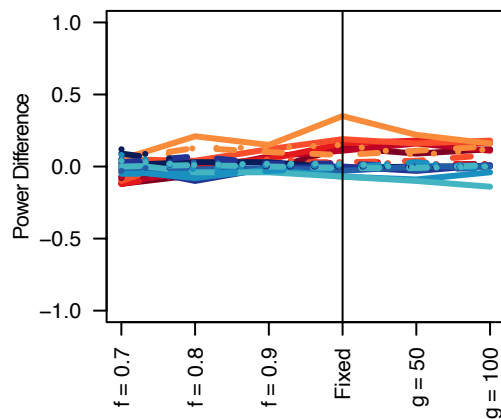

**Figure S33.** Power difference between unphased implementations of XP-EHH (A, C, and E) and XP-nSL (B, D, and F) and phased implementations. Blue curves represent the power difference between the unphased and phased statistics when applied to unphased data (UN). Red curves represent the power difference between the unphased and phased statistics when applied to perfectly phased data (PH). Values greater than 0 indicate the unphased statistic had higher power. Applied to demographic histories Demo 1 (A and B), Demo 2 (C and D), and Demo 3 (E and F) with  $n = 50$  diploid samples from each population.  $s$  is the selection coefficient,  $f$  is the frequency of the adaptive allele at time of sampling,  $g$  is the number of generations at time of sampling since fixation,  $e$  is the frequency at which selection began, and  $t_d = 4000$  is the time in generations since the two populations diverged.

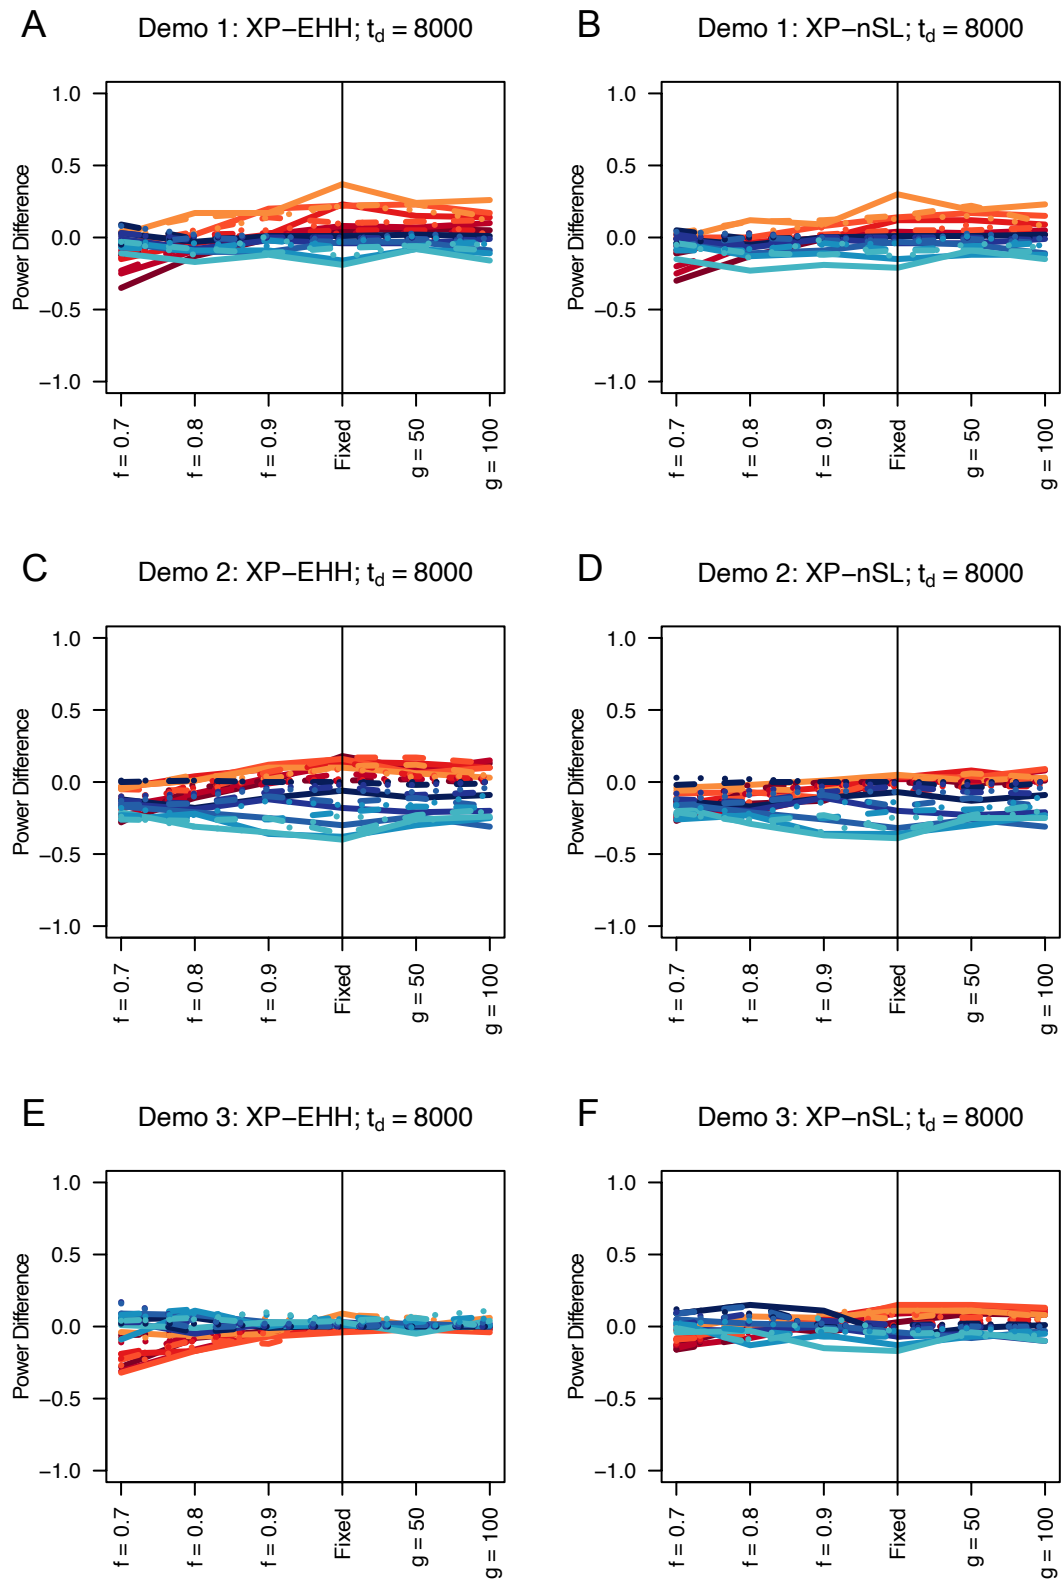

**Figure S34.** Power difference between unphased implementations of XP-EHH (A, C, and E) and XP-nSL (B, D, and F) and phased implementations. Blue curves represent the power difference between the unphased and phased statistics when applied to unphased data (UN). Red curves represent the power difference between the unphased and phased statistics when applied to perfectly phased data (PH). Values greater than 0 indicate the unphased statistic had higher power. Applied to demographic histories Demo 1 (A and B), Demo 2 (C and D), and Demo 3 (E and F) with  $n = 50$  diploid samples from each population.  $s$  is the selection coefficient,  $f$  is the frequency of the adaptive allele at time of sampling,  $g$  is the number of generations at time of sampling since fixation,  $e$  is the frequency at which selection began, and  $t_d = 8000$  is the time in generations since the two populations diverged.

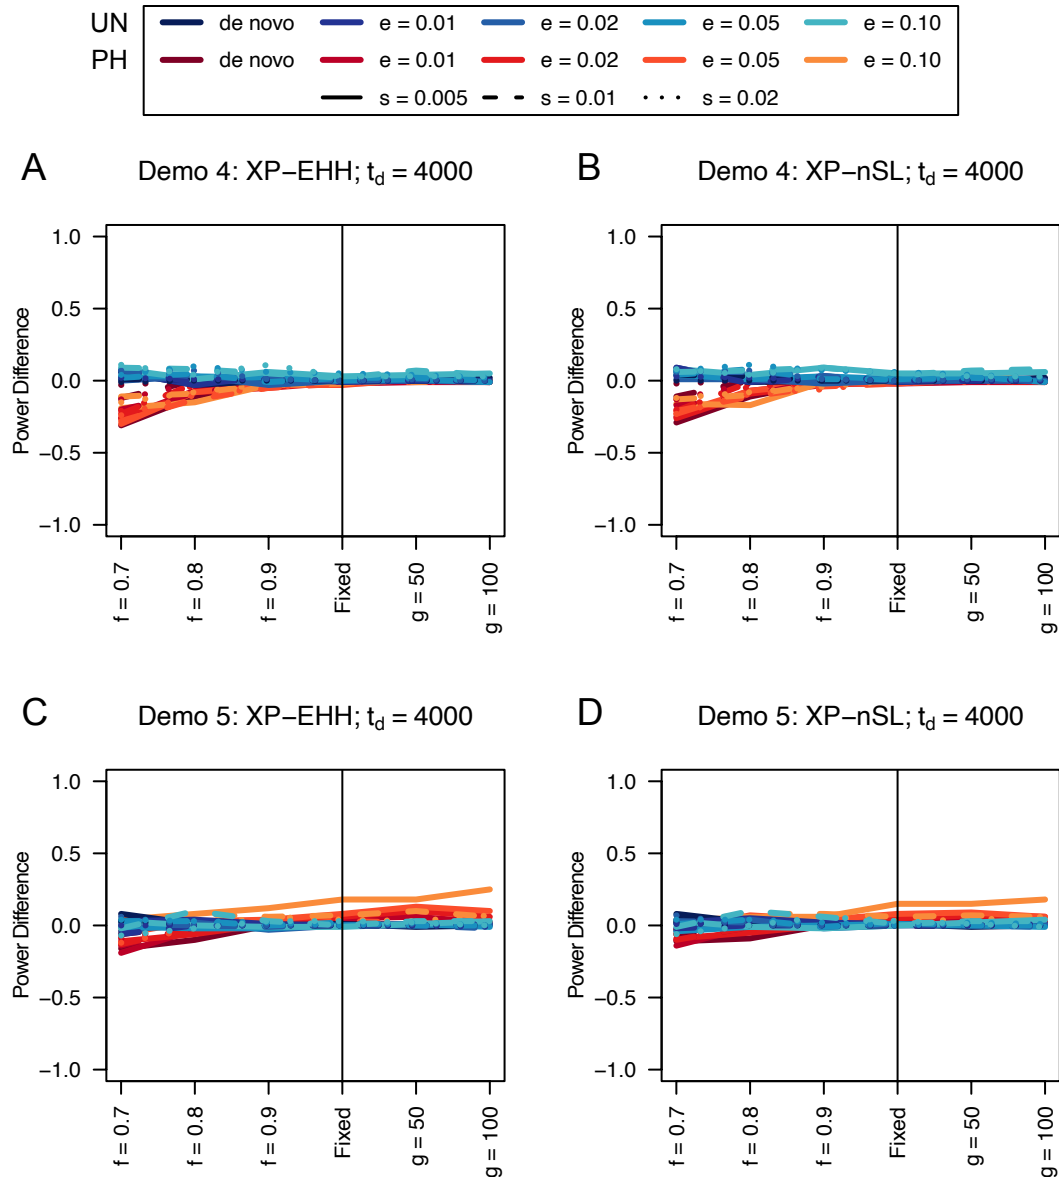

**Figure S35.** Power difference between unphased implementations of XP-EHH (A and C) and XP-nSL (B and D) and phased implementations. Blue curves represent the power difference between the unphased and phased statistics when applied to unphased data (UN). Red curves represent the power difference between the unphased and phased statistics when applied to perfectly phased data (PH). Values greater than 0 indicate the unphased statistic had higher power. Applied to demographic histories Demo 4 (A and B), and Demo 5 (C and D) with  $n = 50$  diploid samples from each population.  $s$  is the selection coefficient,  $f$  is the frequency of the adaptive allele at time of sampling,  $g$  is the number of generations at time of sampling since fixation,  $e$  is the frequency at which selection began, and  $t_d = 4000$  is the time in generations since the two populations diverged.

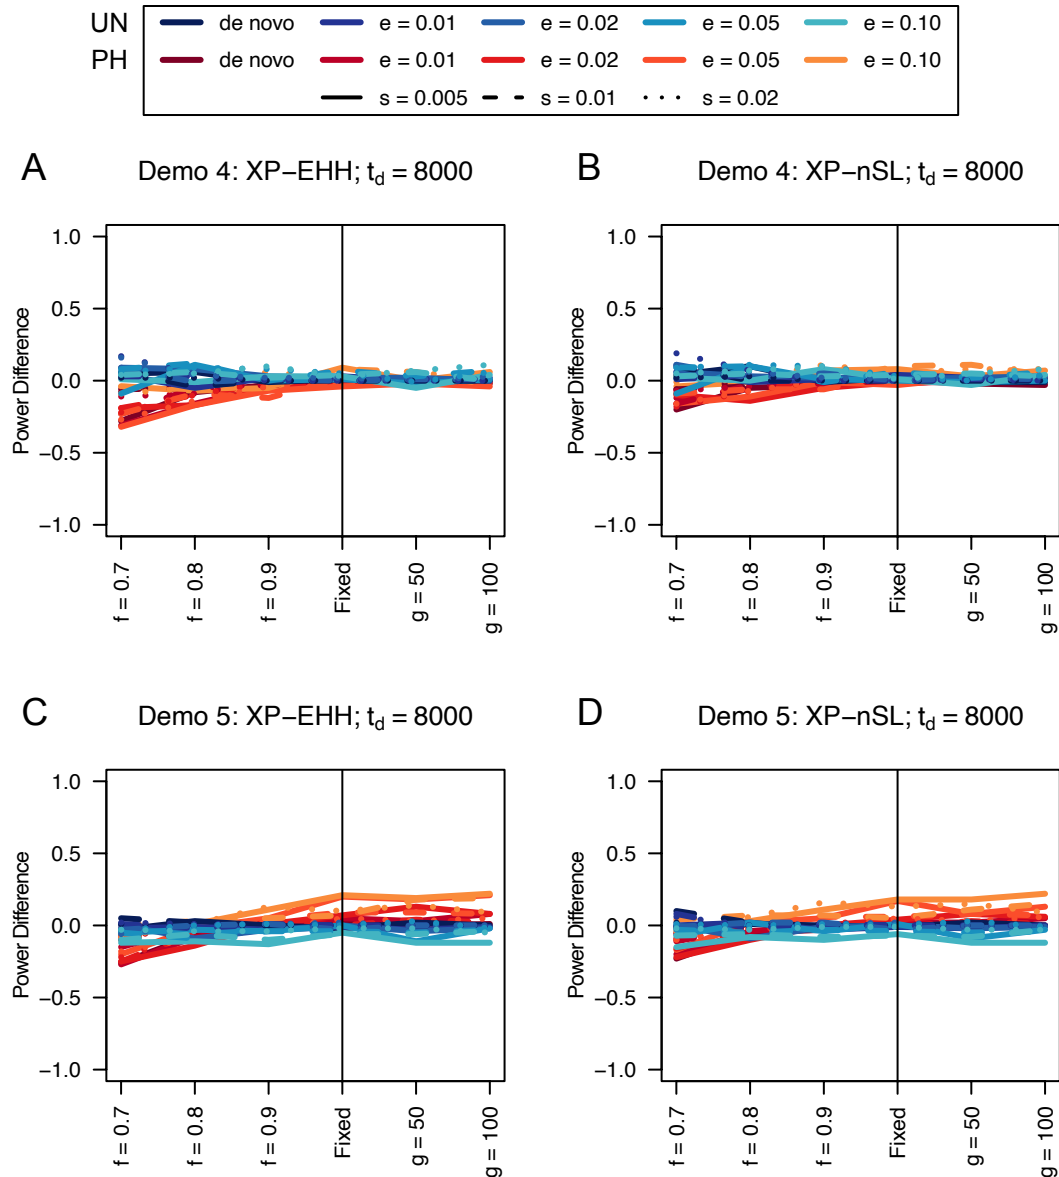

**Table S36.** Power difference between unphased implementations of XP-EHH (A and C) and XP-nSL (B and D) and phased implementations. Blue curves represent the power difference between the unphased and phased statistics when applied to unphased data (UN). Red curves represent the power difference between the unphased and phased statistics when applied to perfectly phased data (PH). Values greater than 0 indicate the unphased statistic had higher power. Applied to demographic histories Demo 4 (A and B), and Demo 5 (C and D) with  $n = 50$  diploid samples from each population.  $s$  is the selection coefficient,  $f$  is the frequency of the adaptive allele at time of sampling,  $g$  is the number of generations at time of sampling since fixation,  $e$  is the frequency at which selection began, and  $t_d = 8000$  is the time in generations since the two populations diverged.

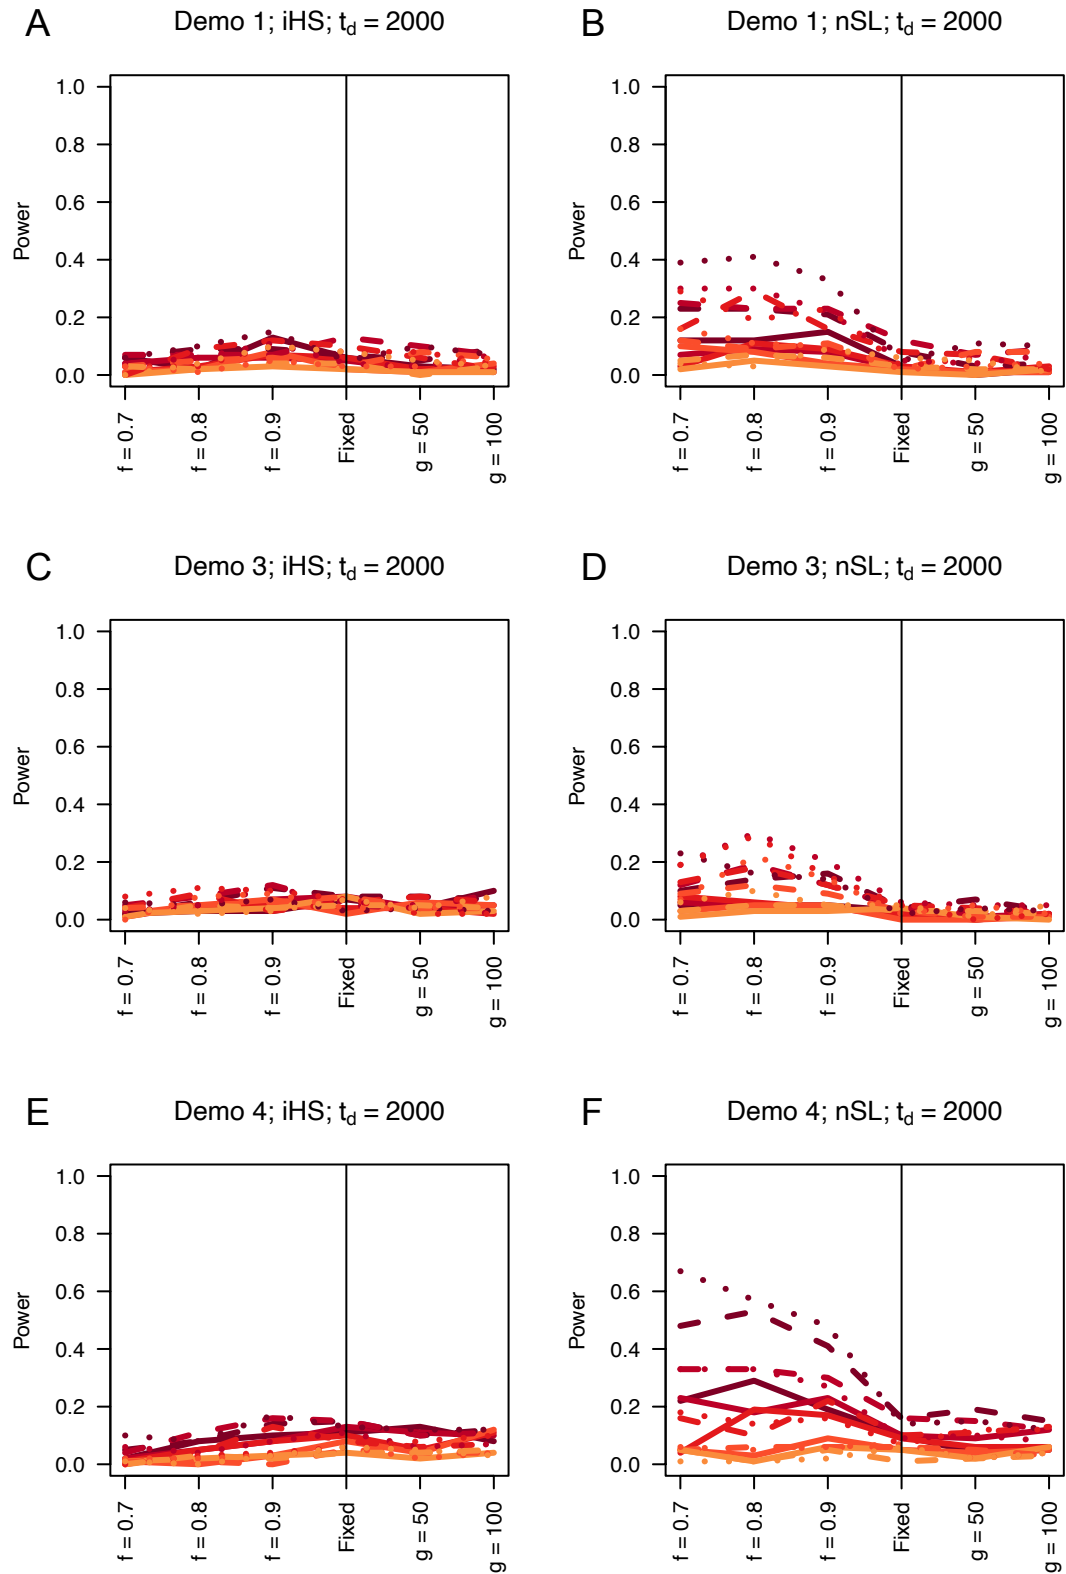

416 **Figure S37.** Power curves for unphased implementations of iHS (A, C, and E) and nSL (B, D, and F)  
417 under demographic histories Demo 1 (A and B), Demo 3 (C and D), and Demo 4 (E and F) with  $n = 20$   
418 diploid samples.  $s$  is the selection coefficient,  $f$  is the frequency of the adaptive allele at time of  
419 sampling,  $g$  is the number of generations at time of sampling since fixation,  $e$  is the frequency at which  
420 selection began, and  $t_d = 2000$  is the time in generations since the two populations diverged.

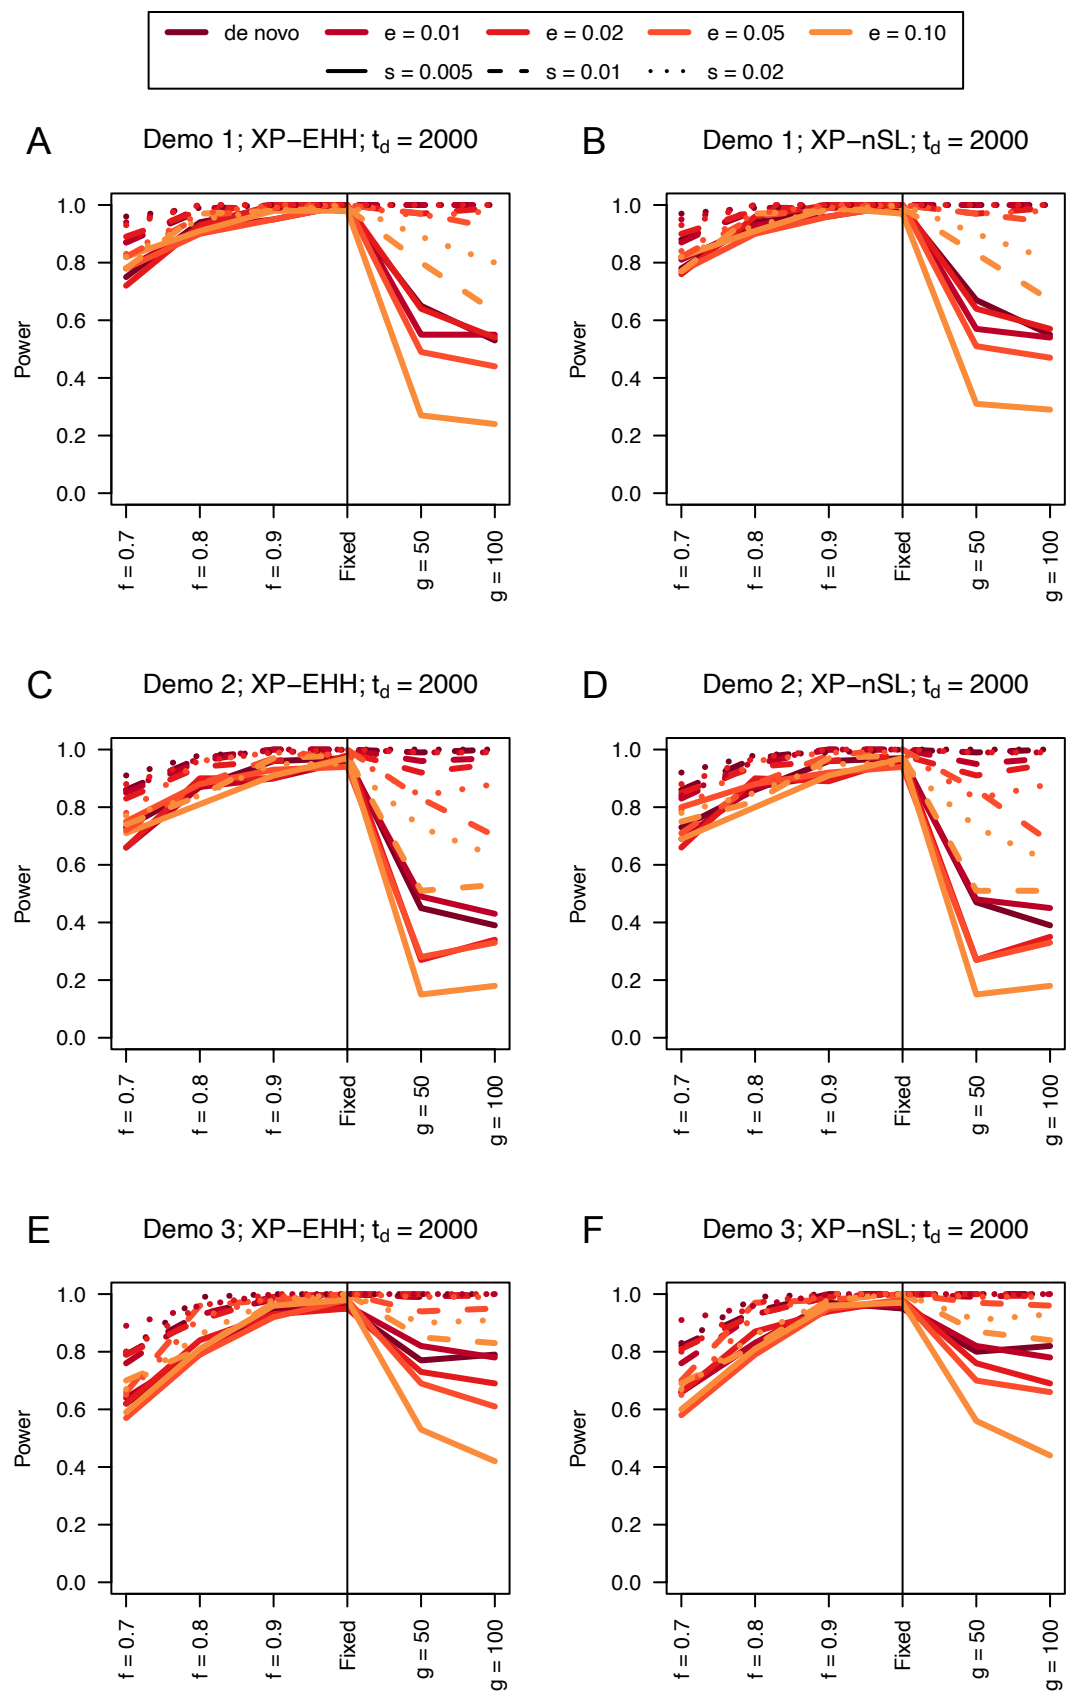

**Figure S38.** Power curves for unphased implementations of XP-EHH (A, C, and E) and XP-nSL (B, D, and F) under demographic histories Demo 1 (A and B), Demo 2 (C and D), and Demo 3 (E and F) with  $n = 20$  diploid samples from each population.  $s$  is the selection coefficient,  $f$  is the frequency of the adaptive allele at time of sampling,  $g$  is the number of generations at time of sampling since fixation,  $e$  is the frequency at which selection began, and  $t_d = 2000$  is the time in generations since the two populations diverged.

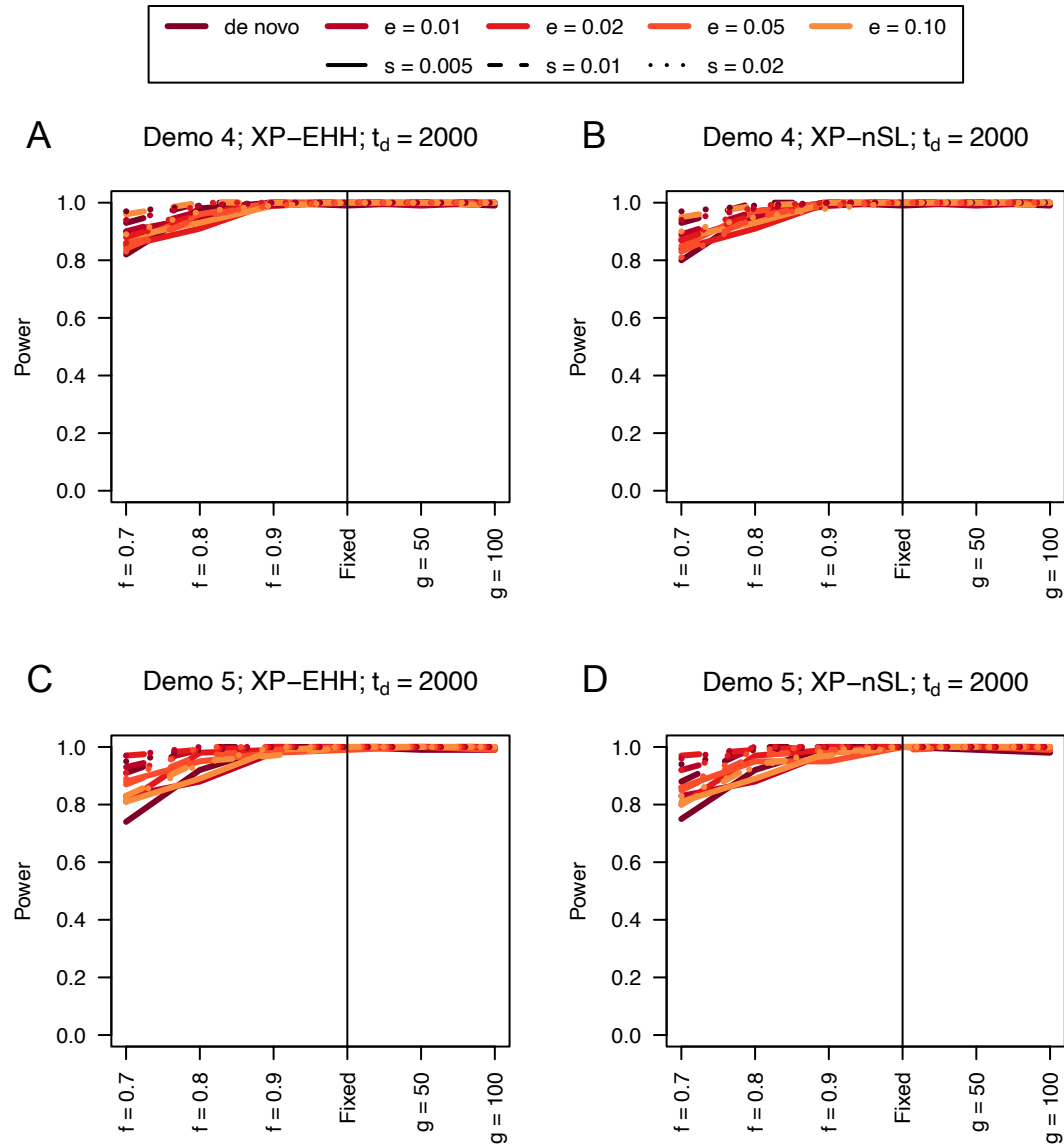

**Figure S39.** Power curves for unphased implementations of XP-EHH (A and C) and XP-nSL (B and D) under demographic histories Demo 4 (A and B), and Demo 5 (C and D) with  $n = 20$  diploid samples from each population.  $s$  is the selection coefficient,  $f$  is the frequency of the adaptive allele at time of sampling,  $g$  is the number of generations at time of sampling since fixation,  $e$  is the frequency at which selection began, and  $t_d = 2000$  is the time in generations since the two populations diverged.

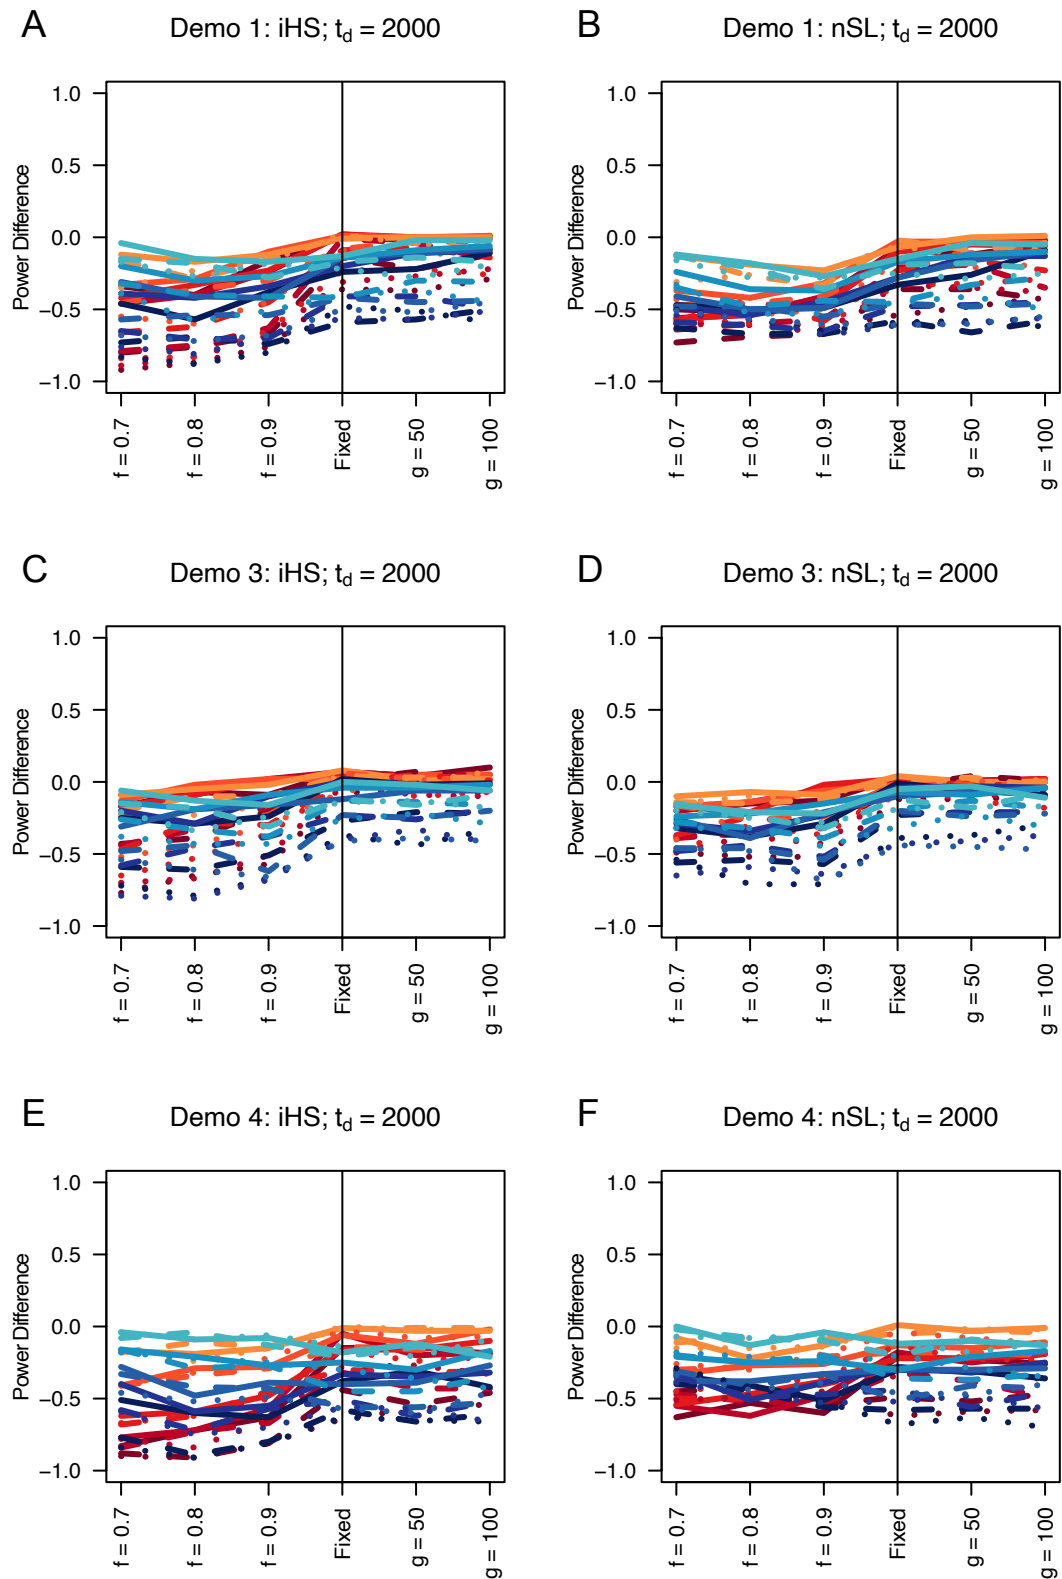

**Figure S40.** Power difference between unphased implementations of iHS (A, C, and E) and nSL (B, D, and F) and phased implementations. Blue curves represent the power difference between the unphased and phased statistics when applied to unphased data (UN). Red curves represent the power difference between the unphased and phased statistics when applied to perfectly phased data (PH). Values greater than 0 indicate the unphased statistic had higher power. Applied to demographic histories Demo 1 (A and B), Demo 3 (C and D), and Demo 4 (E and F) with  $n = 20$  diploid samples.  $s$  is the selection coefficient,  $f$  is the frequency of the adaptive allele at time of sampling,  $g$  is the number of generations at time of sampling since fixation,  $e$  is the frequency at which selection began, and  $t_d = 2000$  is the time in generations since the two populations diverged.



**A** Demo 1: XP-EHH;  $t_d = 2000$

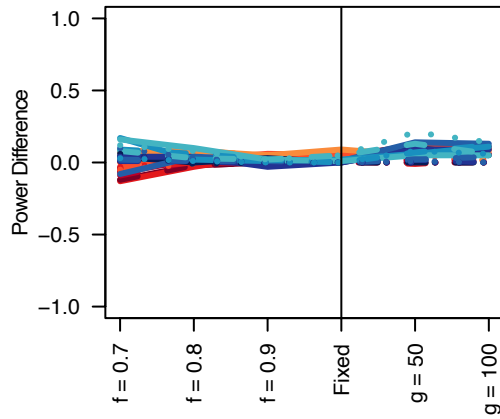

**B** Demo 1: XP-nSL;  $t_d = 2000$

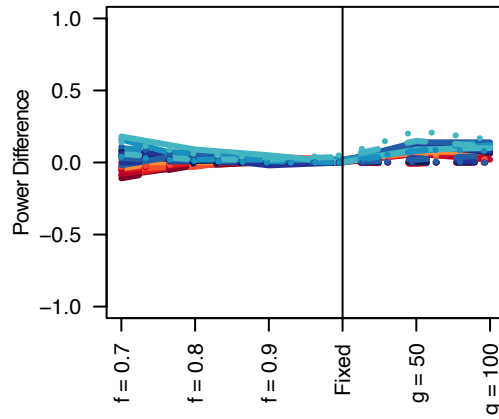

**C** Demo 2: XP-EHH;  $t_d = 2000$

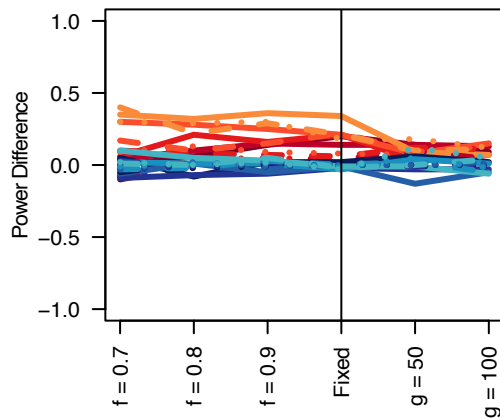

**D** Demo 2: XP-nSL;  $t_d = 2000$

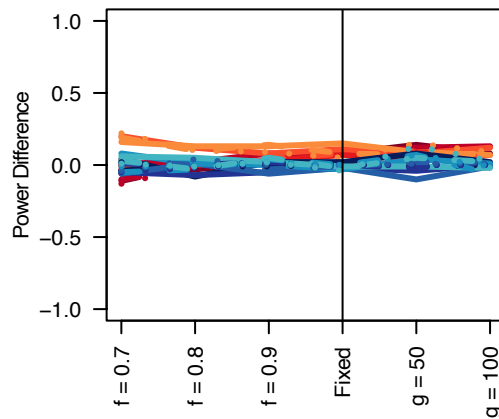

**E** Demo 3: XP-EHH;  $t_d = 2000$

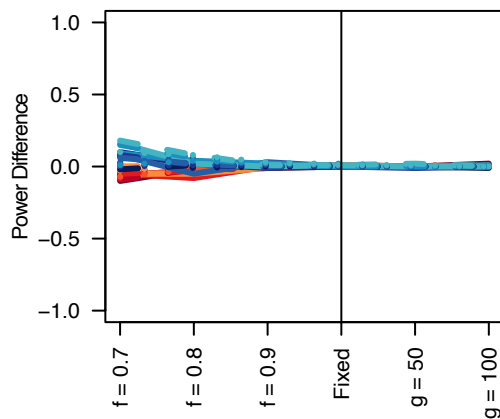

**F** Demo 3: XP-nSL;  $t_d = 2000$

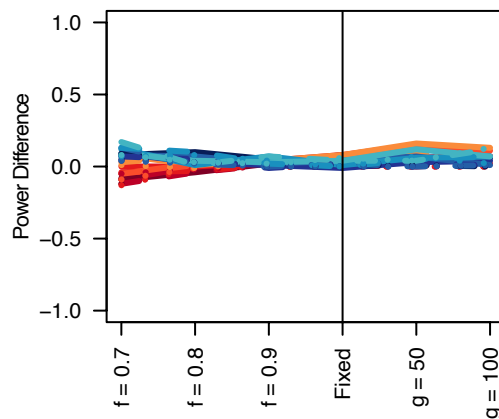

**Figure S41.** Power difference between unphased implementations of XP-EHH (A, C, and E) and XP-nSL (B, D, and F) and phased implementations. Blue curves represent the power difference between the unphased and phased statistics when applied to unphased data (UN). Red curves represent the power difference between the unphased and phased statistics when applied to perfectly phased data (PH). Values greater than 0 indicate the unphased statistic had higher power. Applied to demographic histories Demo 1 (A and B), Demo 2 (C and D), and Demo 3 (E and F) with  $n = 20$  diploid samples from each population.  $s$  is the selection coefficient,  $f$  is the frequency of the adaptive allele at time of sampling,  $g$  is the number of generations at time of sampling since fixation,  $e$  is the frequency at which selection began, and  $t_d = 2000$  is the time in generations since the two populations diverged.

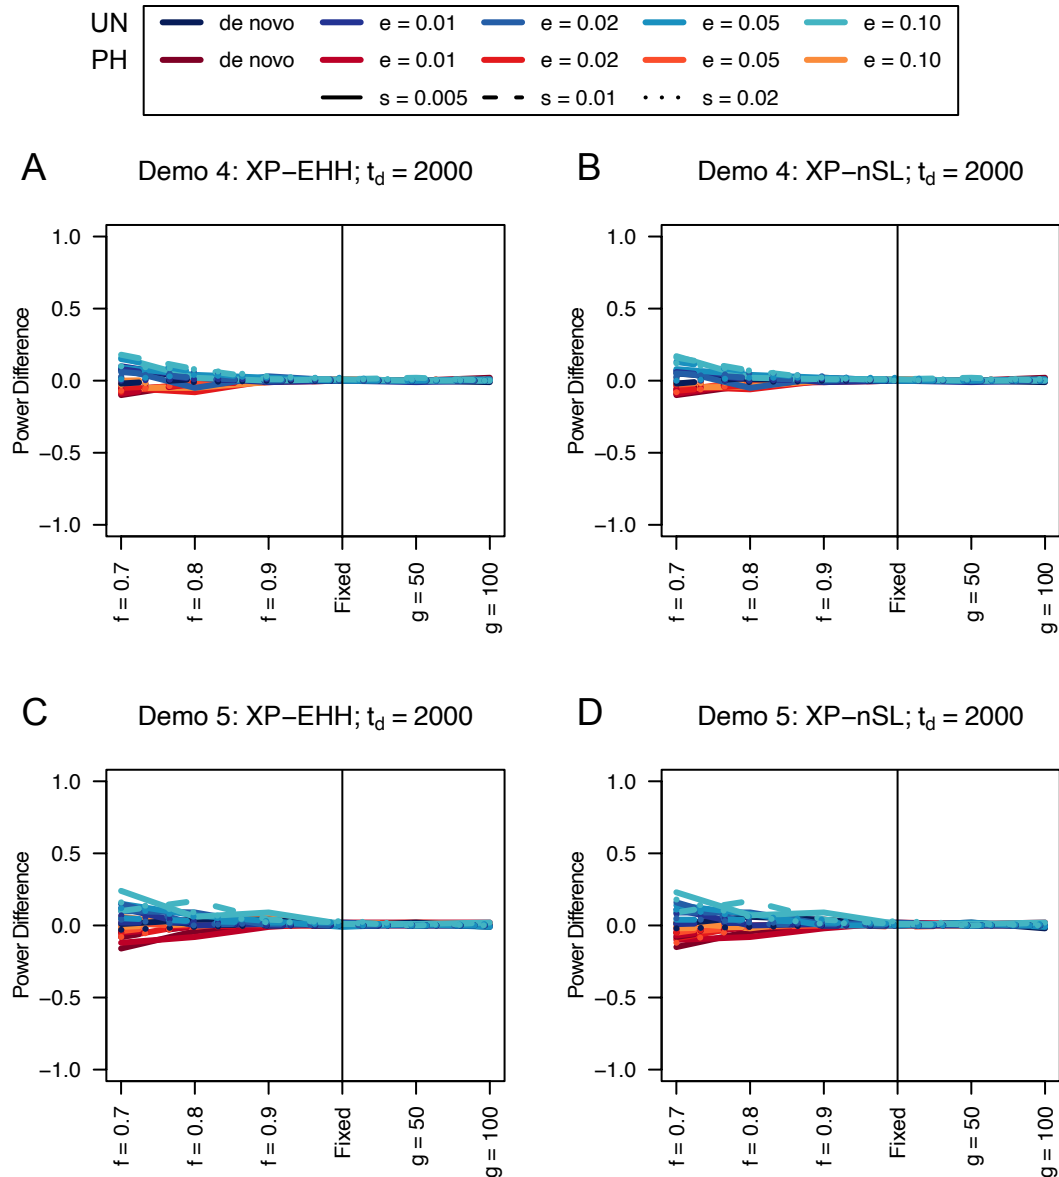

**Figure S42.** Power difference between unphased implementations of XP-EHH (A and C) and XP-nSL (B and D) and phased implementations. Blue curves represent the power difference between the unphased and phased statistics when applied to unphased data (UN). Red curves represent the power difference between the unphased and phased statistics when applied to perfectly phased data (PH). Values greater than 0 indicate the unphased statistic had higher power. Applied to demographic histories Demo 4 (A and B), and Demo 5 (C and D) with  $n = 20$  diploid samples from each population.  $s$  is the selection coefficient,  $f$  is the frequency of the adaptive allele at time of sampling,  $g$  is the number of generations at time of sampling since fixation,  $e$  is the frequency at which selection began, and  $t_d = 2000$  is the time in generations since the two populations diverged.

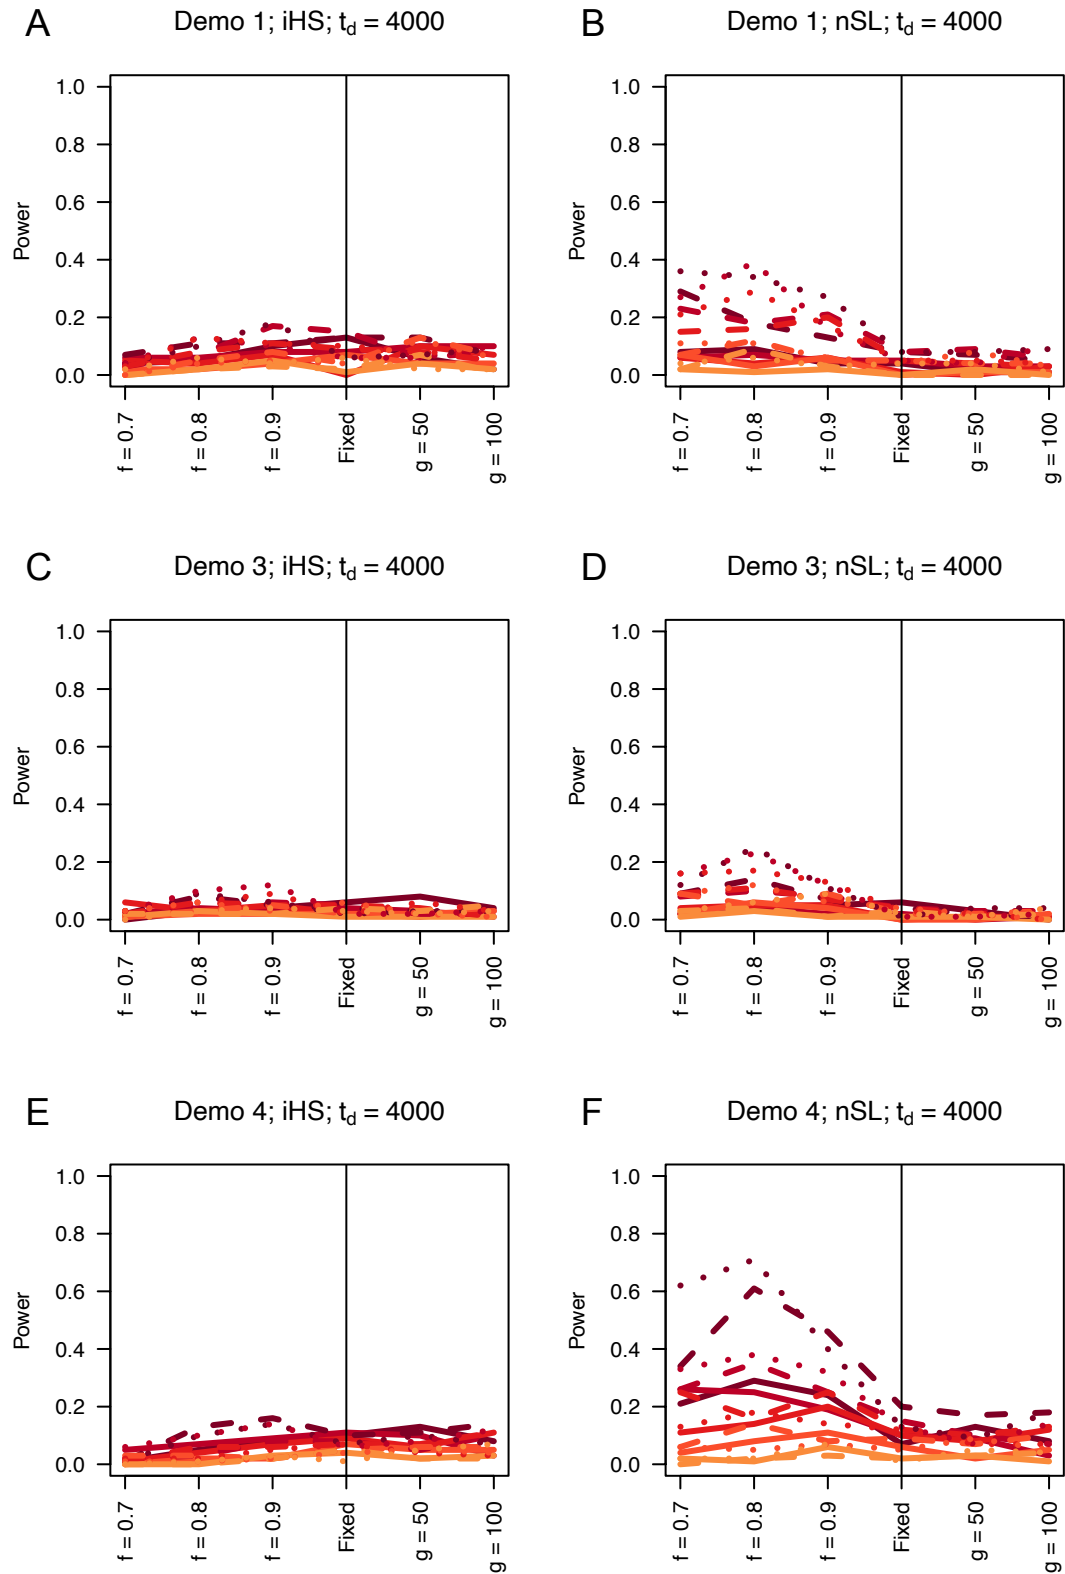

485 **Figure S43.** Power curves for unphased implementations of iHS (A, C, and E) and nSL (B, D, and F)  
486 under demographic histories Demo 1 (A and B), Demo 3 (C and D), and Demo 4 (E and F) with  $n = 20$   
487 diploid samples.  $s$  is the selection coefficient,  $f$  is the frequency of the adaptive allele at time of  
488 sampling,  $g$  is the number of generations at time of sampling since fixation,  $e$  is the frequency at which  
489 selection began, and  $t_d = 4000$  is the time in generations since the two populations diverged.

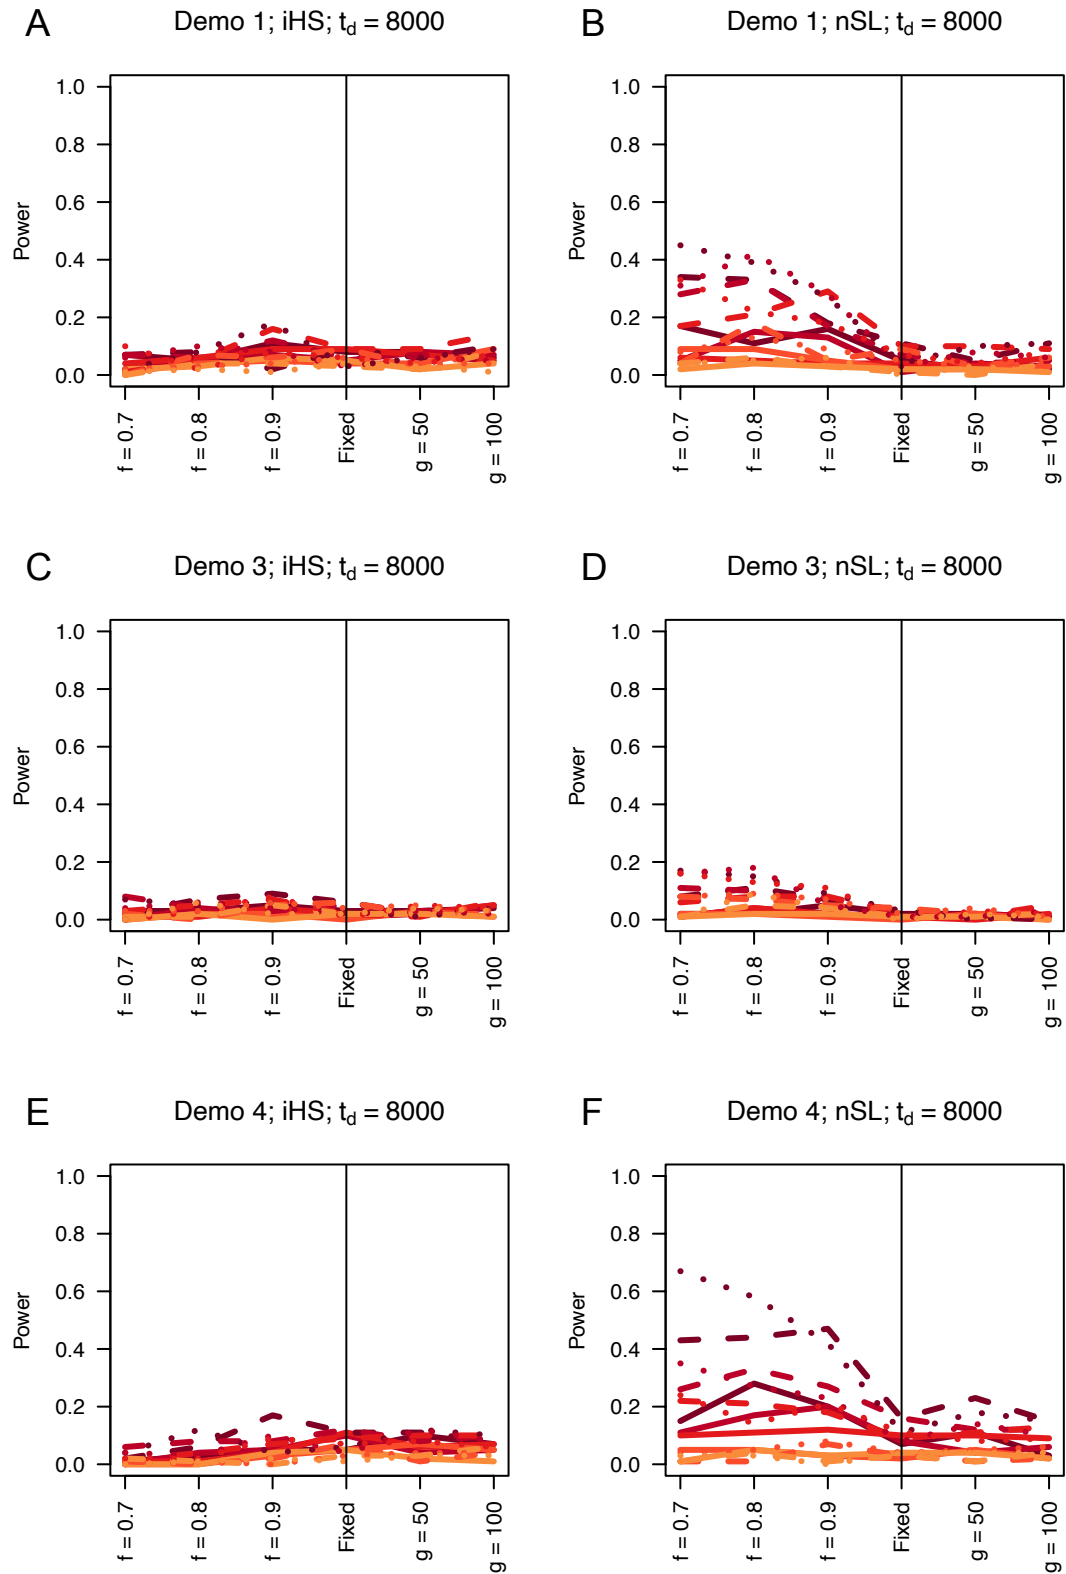

491 **Figure S44.** Power curves for unphased implementations of iHS (A, C, and E) and nSL (B, D, and F)  
492 under demographic histories Demo 1 (A and B), Demo 3 (C and D), and Demo 4 (E and F) with  $n = 20$   
493 diploid samples.  $s$  is the selection coefficient,  $f$  is the frequency of the adaptive allele at time of  
494 sampling,  $g$  is the number of generations at time of sampling since fixation,  $e$  is the frequency at which  
495 selection began, and  $t_d = 8000$  is the time in generations since the two populations diverged.

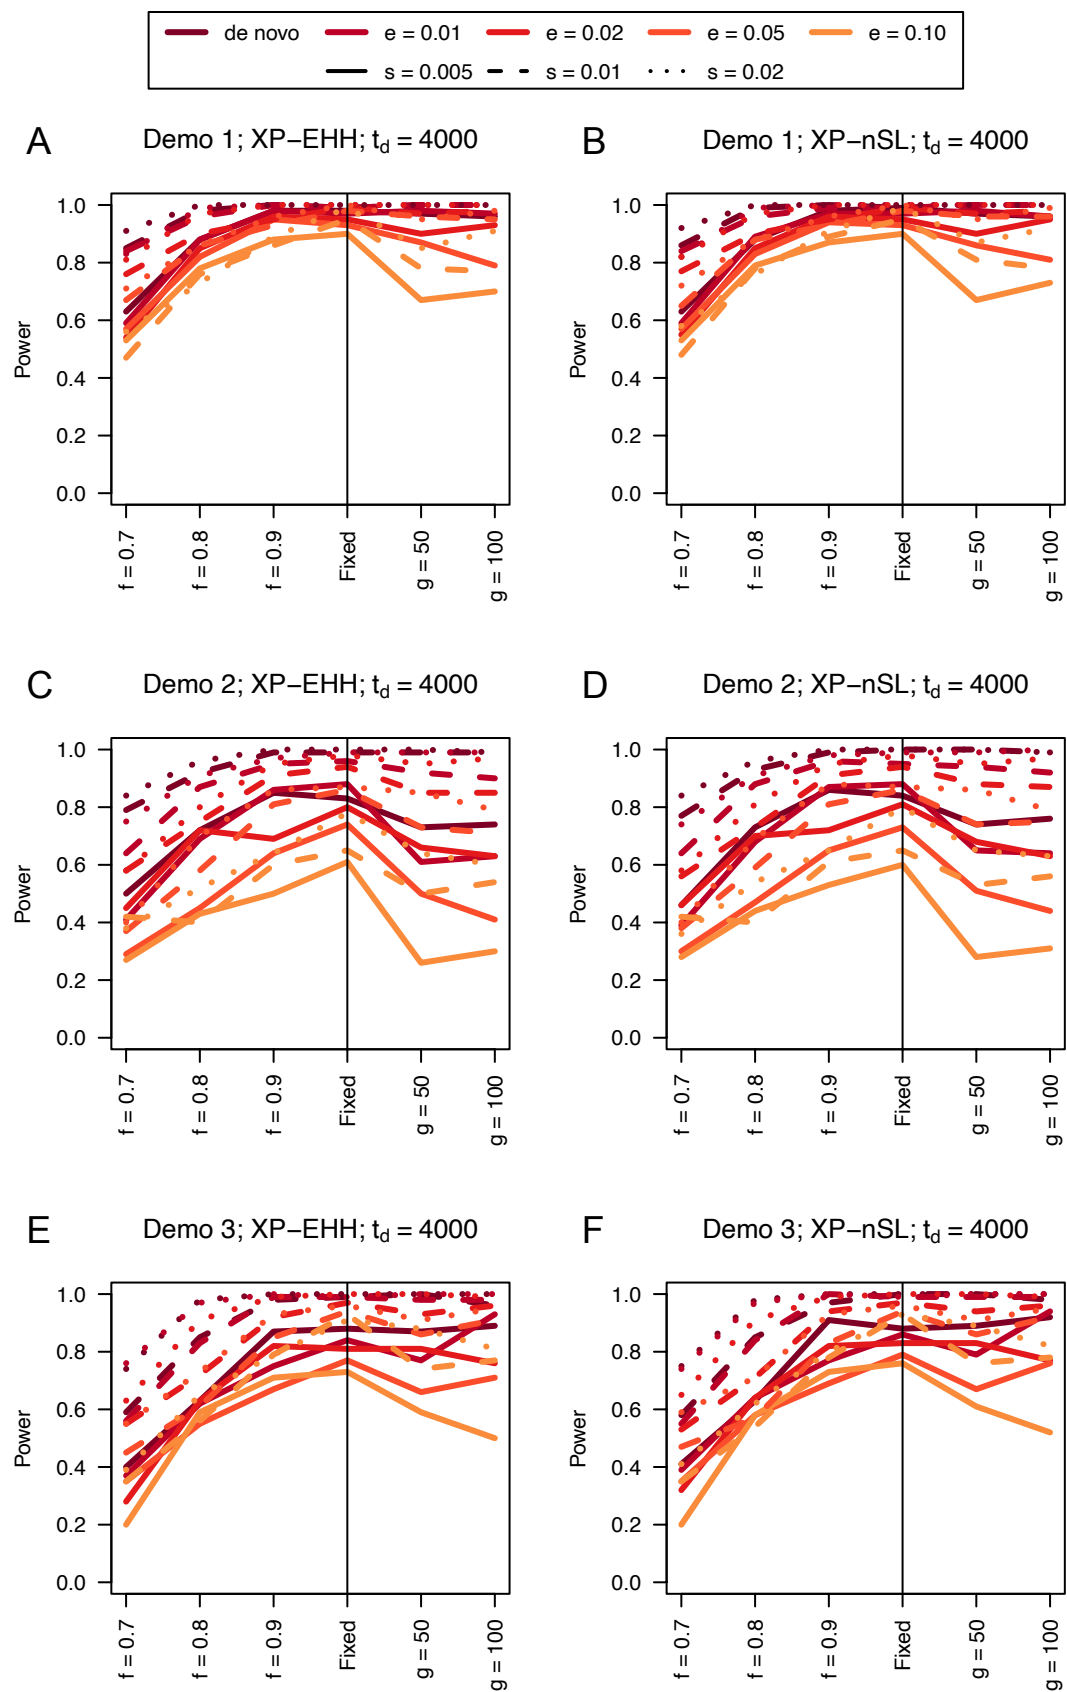

**Figure S45.** Power difference between unphased implementations of XP-EHH (A, C, and E) and XP-nSL (B, D, and F) and phased implementations. Blue curves represent the power difference between the unphased and phased statistics when applied to unphased data (UN). Red curves represent the power difference between the unphased and phased statistics when applied to perfectly phased data (PH). Values greater than 0 indicate the unphased statistic had higher power. Applied to demographic histories Demo 1 (A and B), Demo 2 (C and D), and Demo 3 (E and F) with  $n = 20$  diploid samples from each population.  $s$  is the selection coefficient,  $f$  is the frequency of the adaptive allele at time of sampling,  $g$  is the number of generations at time of sampling since fixation,  $e$  is the frequency at which selection began, and  $t_d = 4000$  is the time in generations since the two populations diverged.

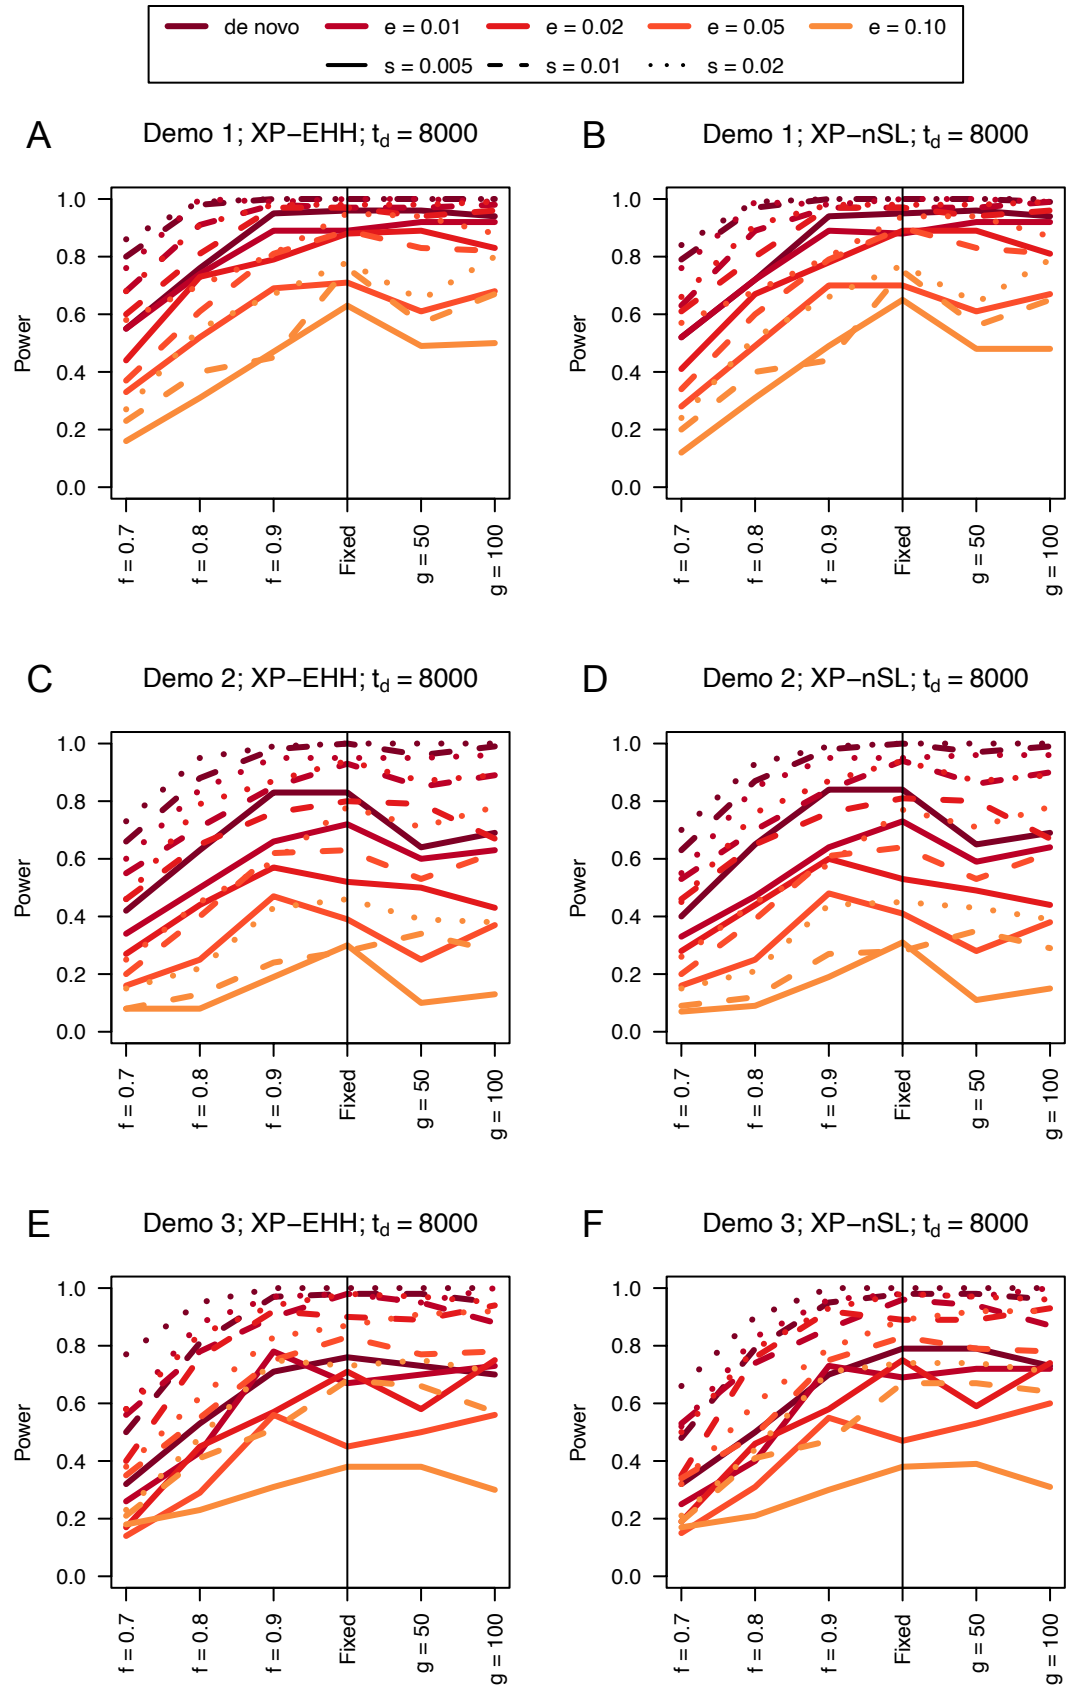

**Figure S46.** Power difference between unphased implementations of XP-EHH (A, C, and E) and XP-nSL (B, D, and F) and phased implementations. Blue curves represent the power difference between the unphased and phased statistics when applied to unphased data (UN). Red curves represent the power difference between the unphased and phased statistics when applied to perfectly phased data (PH). Values greater than 0 indicate the unphased statistic had higher power. Applied to demographic histories Demo 1 (A and B), Demo 2 (C and D), and Demo 3 (E and F) with  $n = 20$  diploid samples from each population.  $s$  is the selection coefficient,  $f$  is the frequency of the adaptive allele at time of sampling,  $g$  is the number of generations at time of sampling since fixation,  $e$  is the frequency at which selection began, and  $t_d = 8000$  is the time in generations since the two populations diverged.

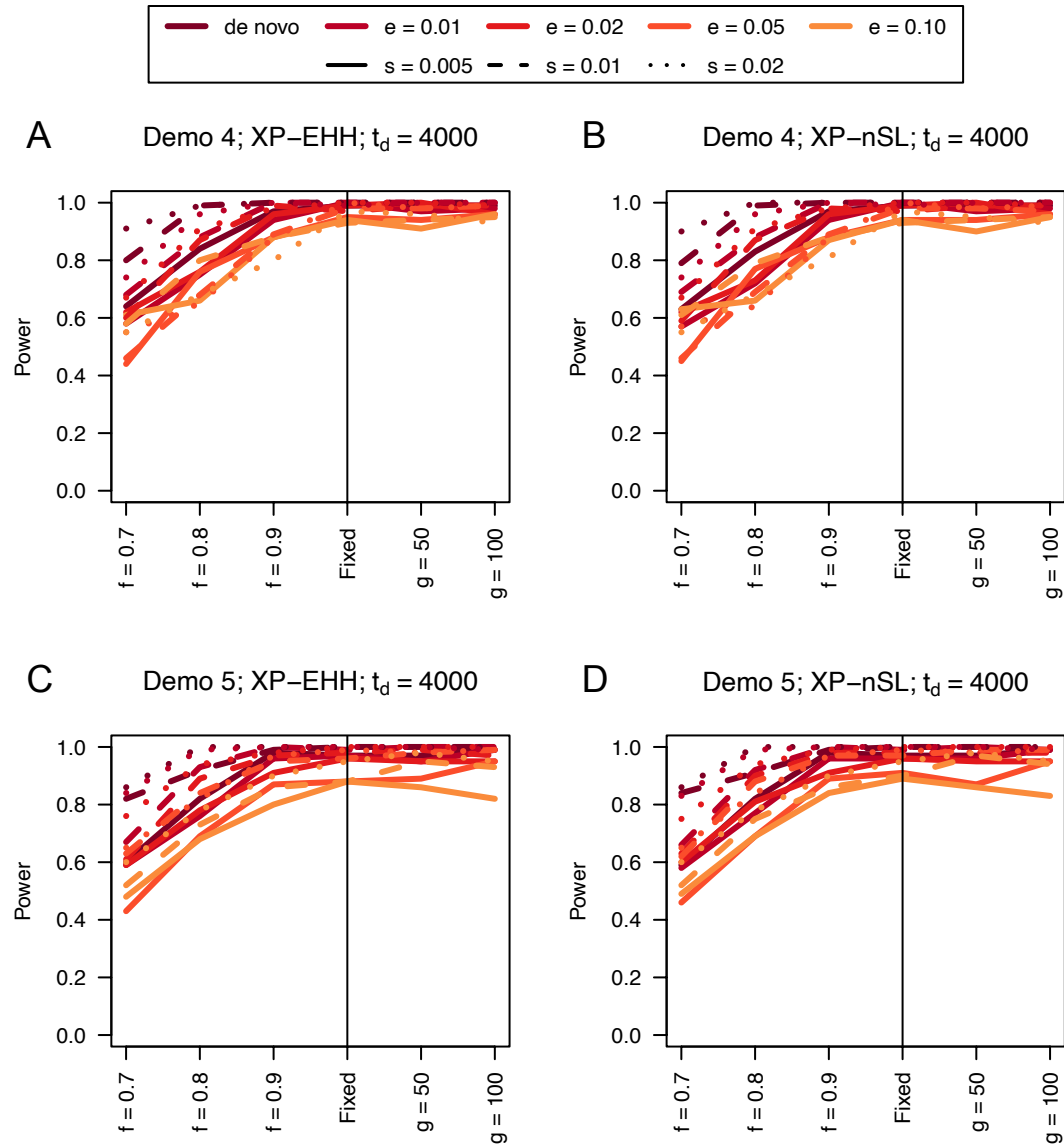

**Figure S47.** Power curves for unphased implementations of XP-EHH (A and C) and XP-nSL (B and D) under demographic histories Demo 4 (A and B), and Demo 5 (C and D) with  $n = 20$  diploid samples from each population.  $s$  is the selection coefficient,  $f$  is the frequency of the adaptive allele at time of sampling,  $g$  is the number of generations at time of sampling since fixation,  $e$  is the frequency at which selection began, and  $t_d = 4000$  is the time in generations since the two populations diverged.

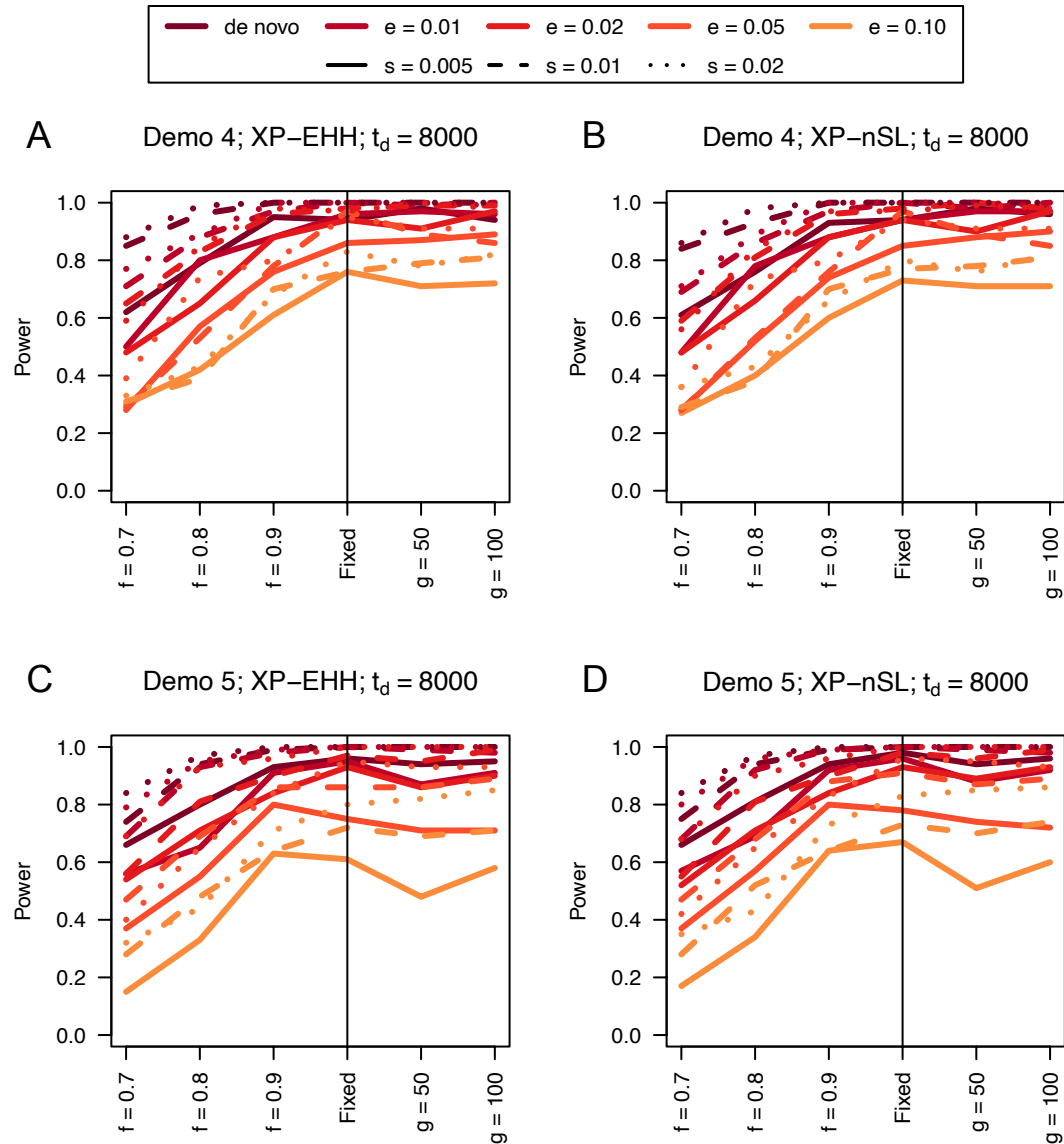

**Figure S48.** Power curves for unphased implementations of XP-EHH (A and C) and XP-nSL (B and D) under demographic histories Demo 4 (A and B), and Demo 5 (C and D) with  $n = 20$  diploid samples from each population.  $s$  is the selection coefficient,  $f$  is the frequency of the adaptive allele at time of sampling,  $g$  is the number of generations at time of sampling since fixation,  $e$  is the frequency at which selection began, and  $t_d = 8000$  is the time in generations since the two populations diverged.

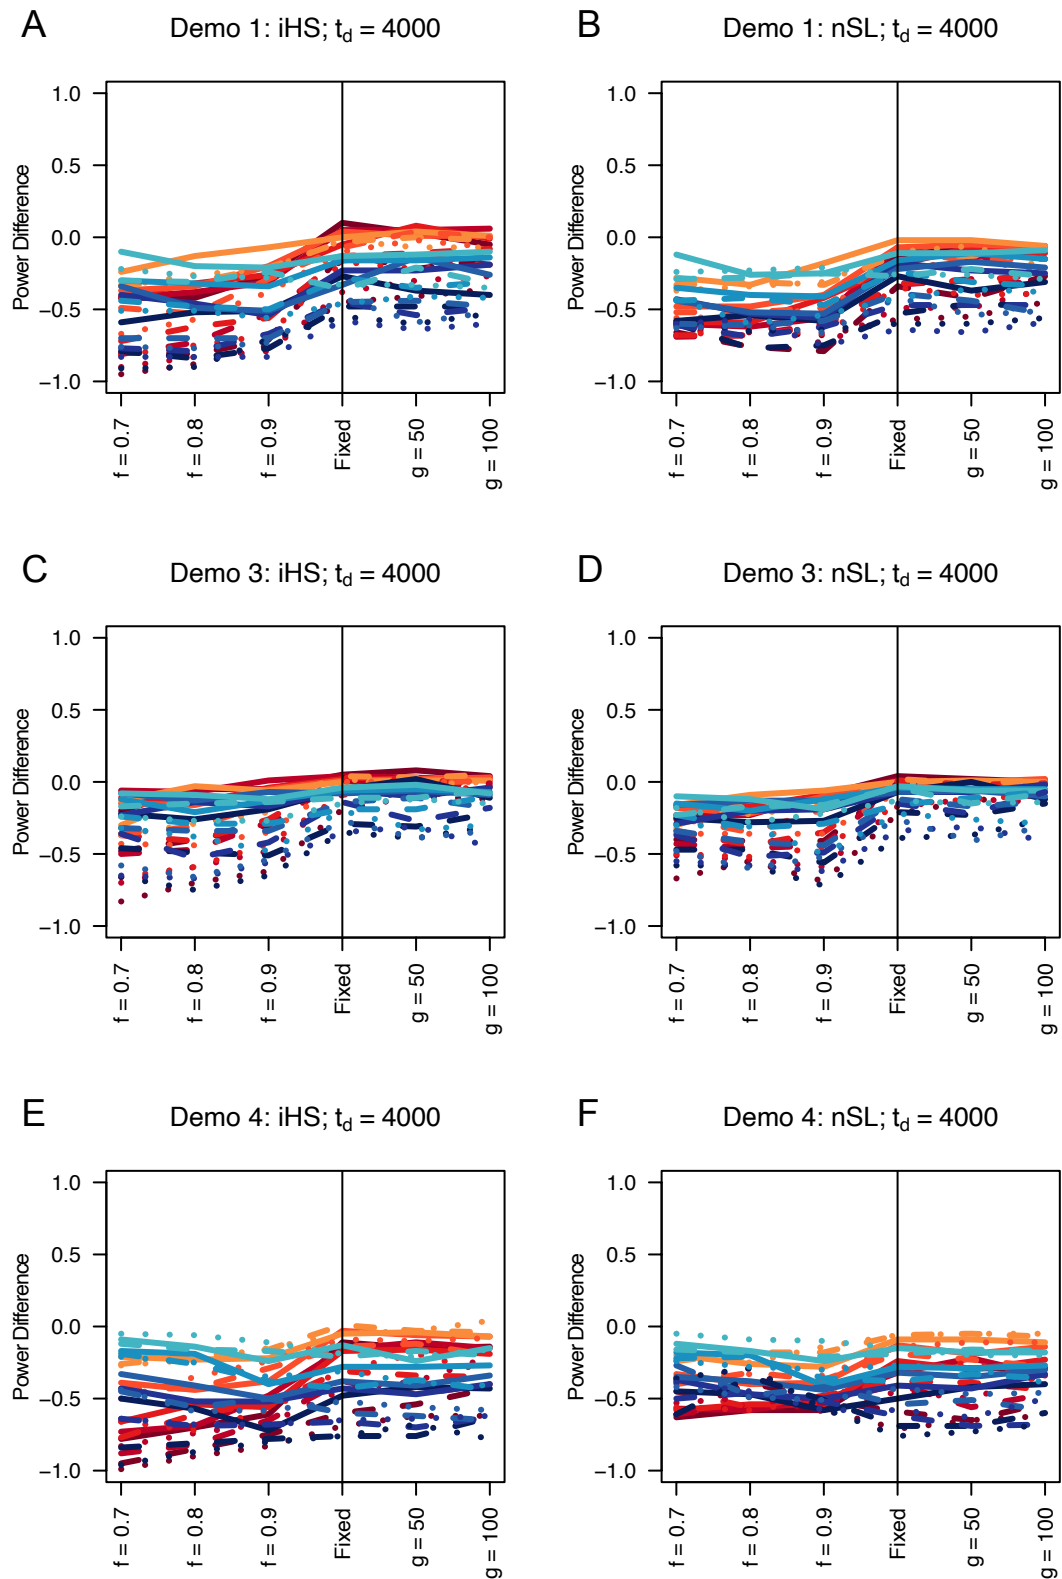

**Figure S49.** Power difference between unphased implementations of iHS (A, C, and E) and nSL (B, D, and F) and phased implementations. Blue curves represent the power difference between the unphased and phased statistics when applied to unphased data (UN). Red curves represent the power difference between the unphased and phased statistics when applied to perfectly phased data (PH). Values greater than 0 indicate the unphased statistic had higher power. Applied to demographic histories Demo 1 (A and B), Demo 3 (C and D), and Demo 4 (E and F) with  $n = 20$  diploid samples.  $s$  is the selection coefficient,  $f$  is the frequency of the adaptive allele at time of sampling,  $g$  is the number of generations at time of sampling since fixation,  $e$  is the frequency at which selection began, and  $t_d = 4000$  is the time in generations since the two populations diverged.

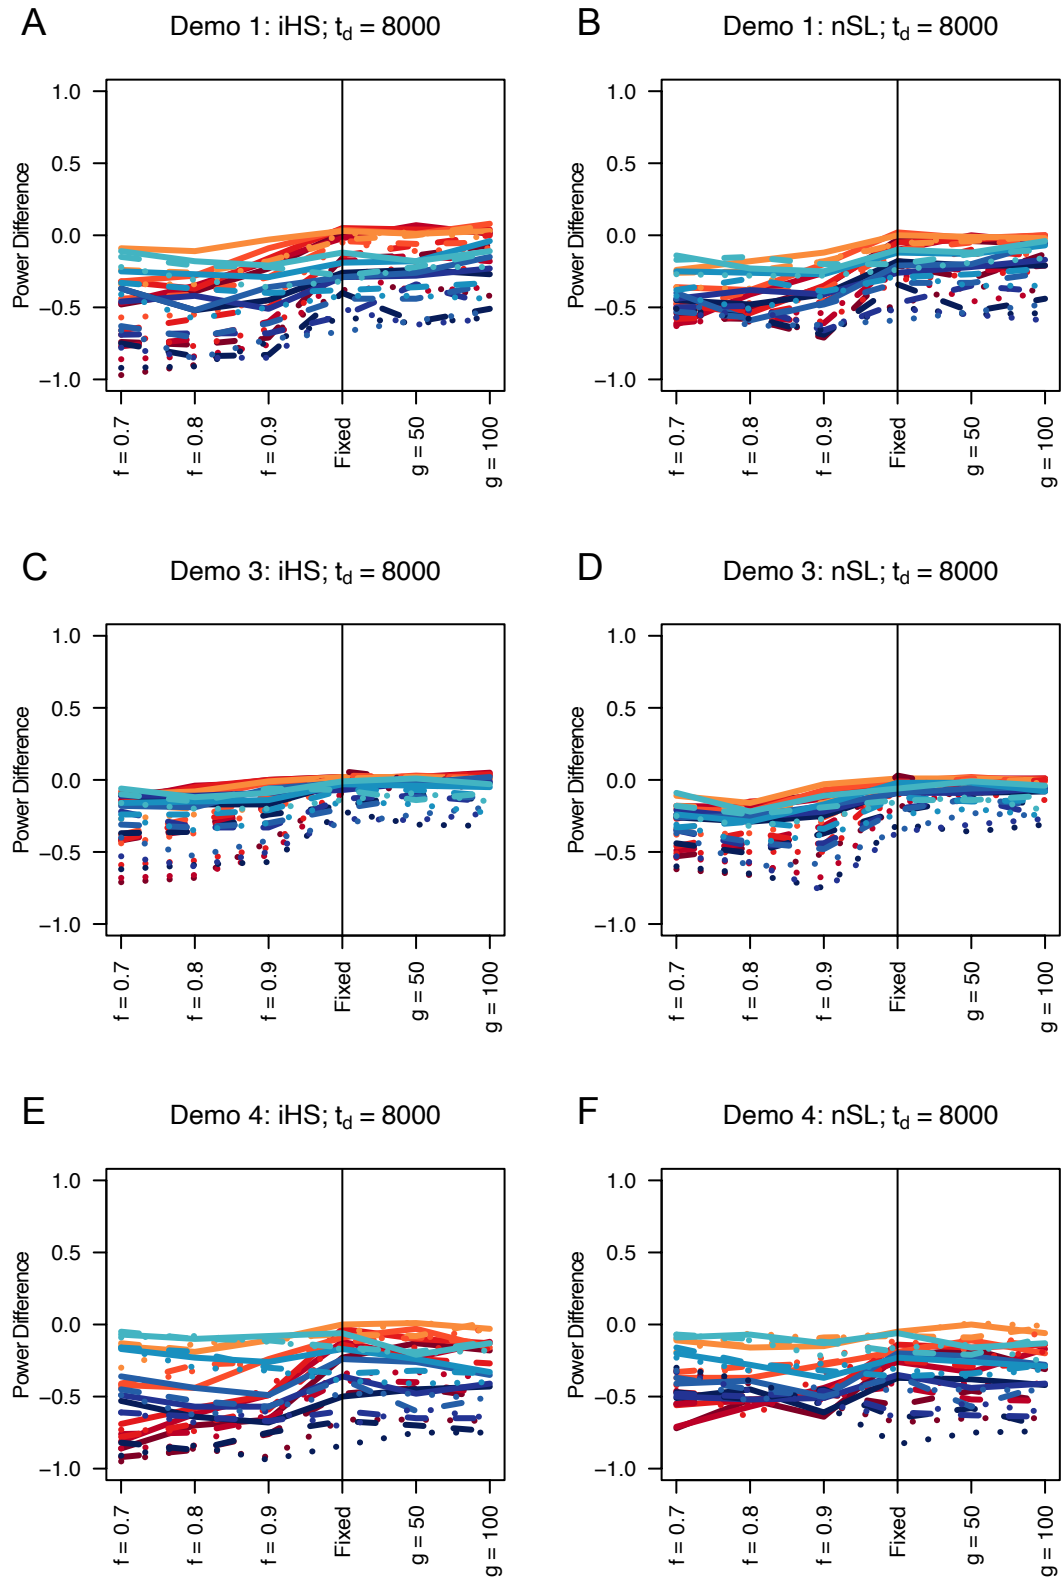

**Figure S50.** Power difference between unphased implementations of iHS (A, C, and E) and nSL (B, D, and F) and phased implementations. Blue curves represent the power difference between the unphased and phased statistics when applied to unphased data (UN). Red curves represent the power difference between the unphased and phased statistics when applied to perfectly phased data (PH). Values greater than 0 indicate the unphased statistic had higher power. Applied to demographic histories Demo 1 (A and B), Demo 3 (C and D), and Demo 4 (E and F) with  $n = 20$  diploid samples.  $s$  is the selection coefficient,  $f$  is the frequency of the adaptive allele at time of sampling,  $g$  is the number of generations at time of sampling since fixation,  $e$  is the frequency at which selection began, and  $t_d = 8000$  is the time in generations since the two populations diverged.



**A** Demo 1: XP-EHH;  $t_d = 4000$

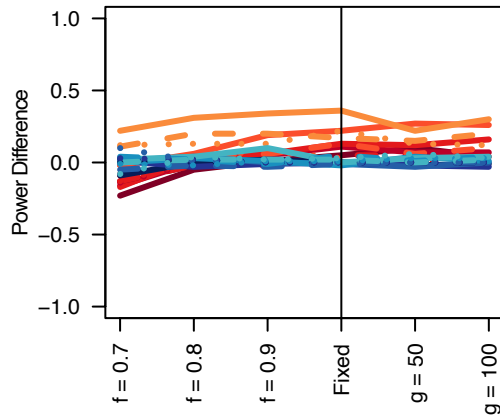

**B** Demo 1: XP-nSL;  $t_d = 4000$

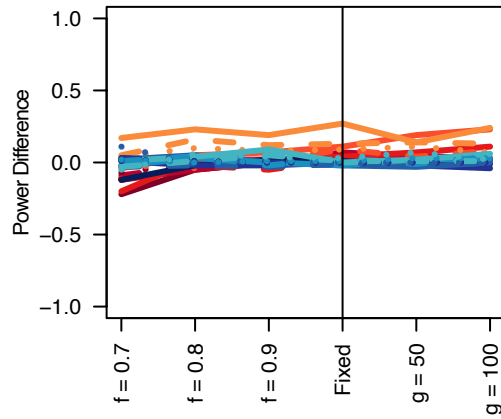

**C** Demo 2: XP-EHH;  $t_d = 4000$

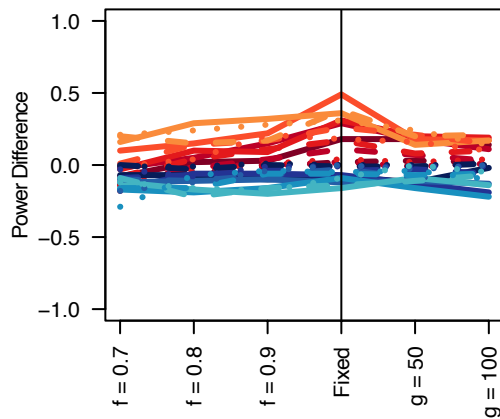

**D** Demo 2: XP-nSL;  $t_d = 4000$

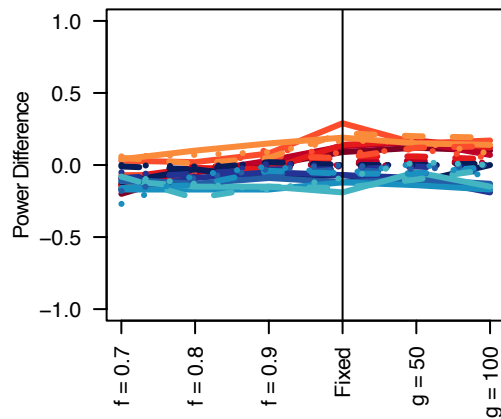

**E** Demo 3: XP-EHH;  $t_d = 4000$

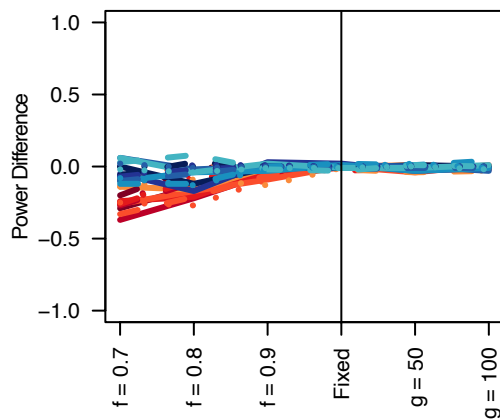

**F** Demo 3: XP-nSL;  $t_d = 4000$

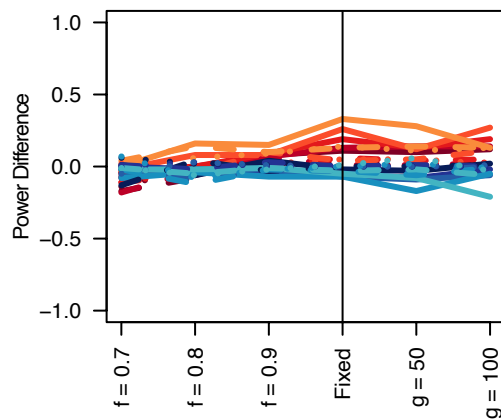

**Figure S51.** Power difference between unphased implementations of XP-EHH (A, C, and E) and XP-nSL (B, D, and F) and phased implementations. Blue curves represent the power difference between the unphased and phased statistics when applied to unphased data (UN). Red curves represent the power difference between the unphased and phased statistics when applied to perfectly phased data (PH). Values greater than 0 indicate the unphased statistic had higher power. Applied to demographic histories Demo 1 (A and B), Demo 2 (C and D), and Demo 3 (E and F) with  $n = 20$  diploid samples from each population.  $s$  is the selection coefficient,  $f$  is the frequency of the adaptive allele at time of sampling,  $g$  is the number of generations at time of sampling since fixation,  $e$  is the frequency at which selection began, and  $t_d = 4000$  is the time in generations since the two populations diverged.

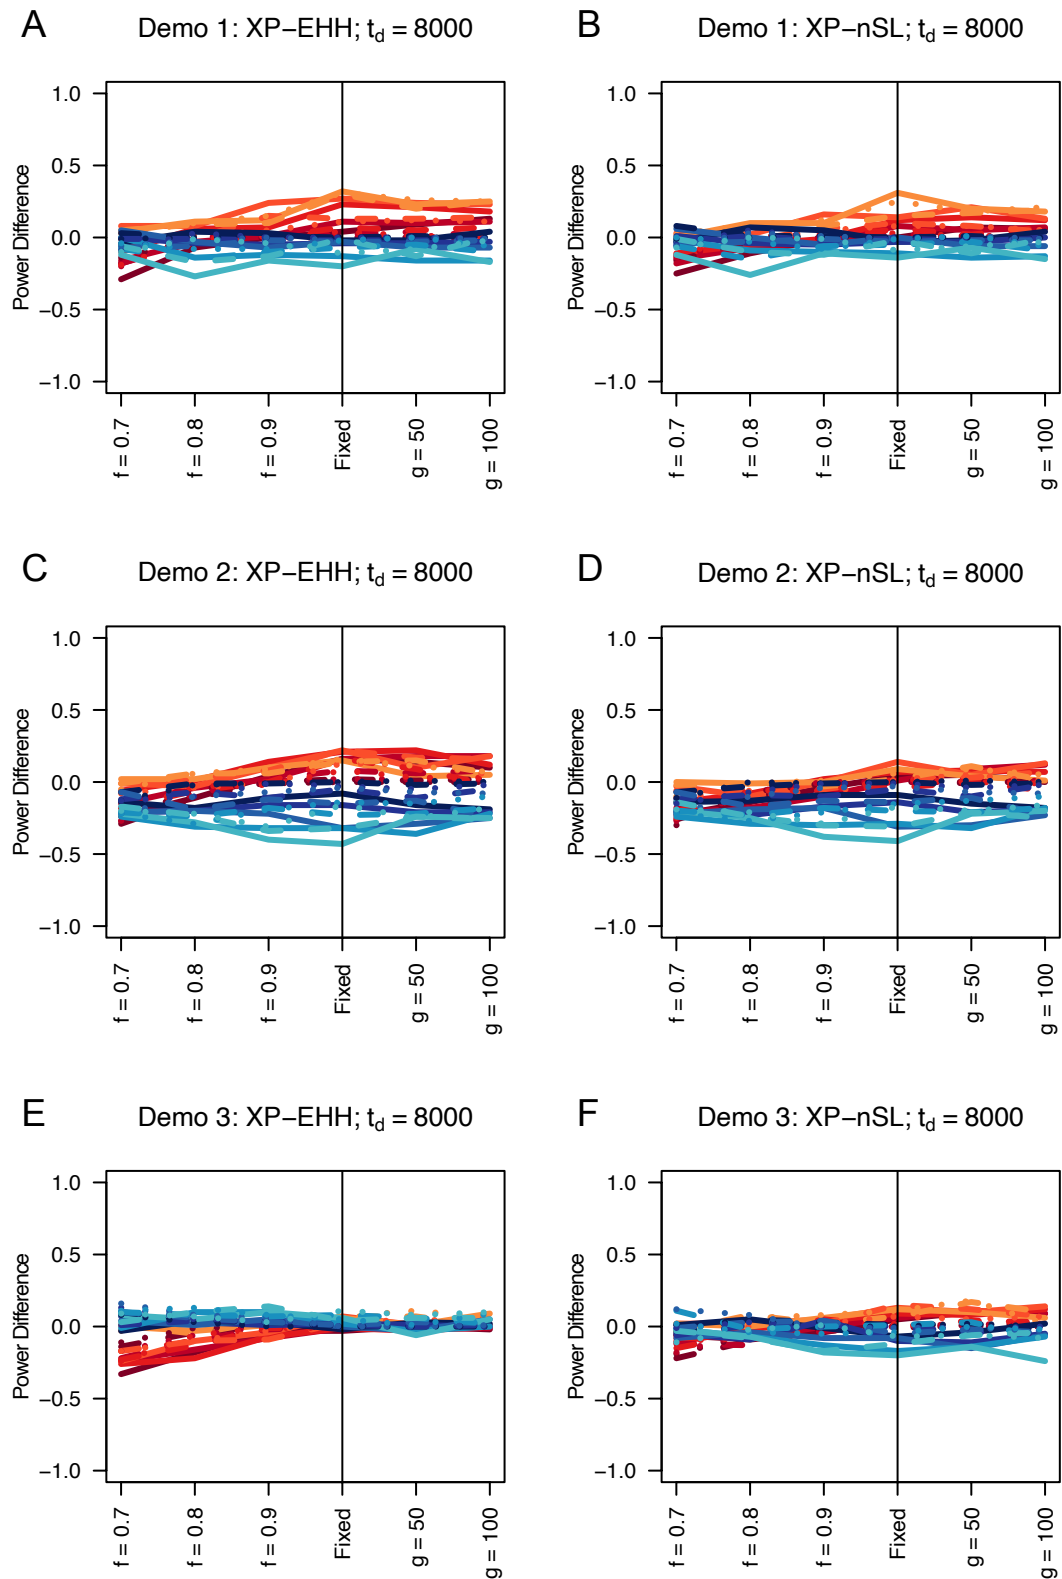

**Figure S52.** Power difference between unphased implementations of XP-EHH (A, C, and E) and XP-nSL (B, D, and F) and phased implementations. Blue curves represent the power difference between the unphased and phased statistics when applied to unphased data (UN). Red curves represent the power difference between the unphased and phased statistics when applied to perfectly phased data (PH). Values greater than 0 indicate the unphased statistic had higher power. Applied to demographic histories Demo 1 (A and B), Demo 2 (C and D), and Demo 3 (E and F) with  $n = 20$  diploid samples from each population.  $s$  is the selection coefficient,  $f$  is the frequency of the adaptive allele at time of sampling,  $g$  is the number of generations at time of sampling since fixation,  $e$  is the frequency at which selection began, and  $t_d = 8000$  is the time in generations since the two populations diverged.

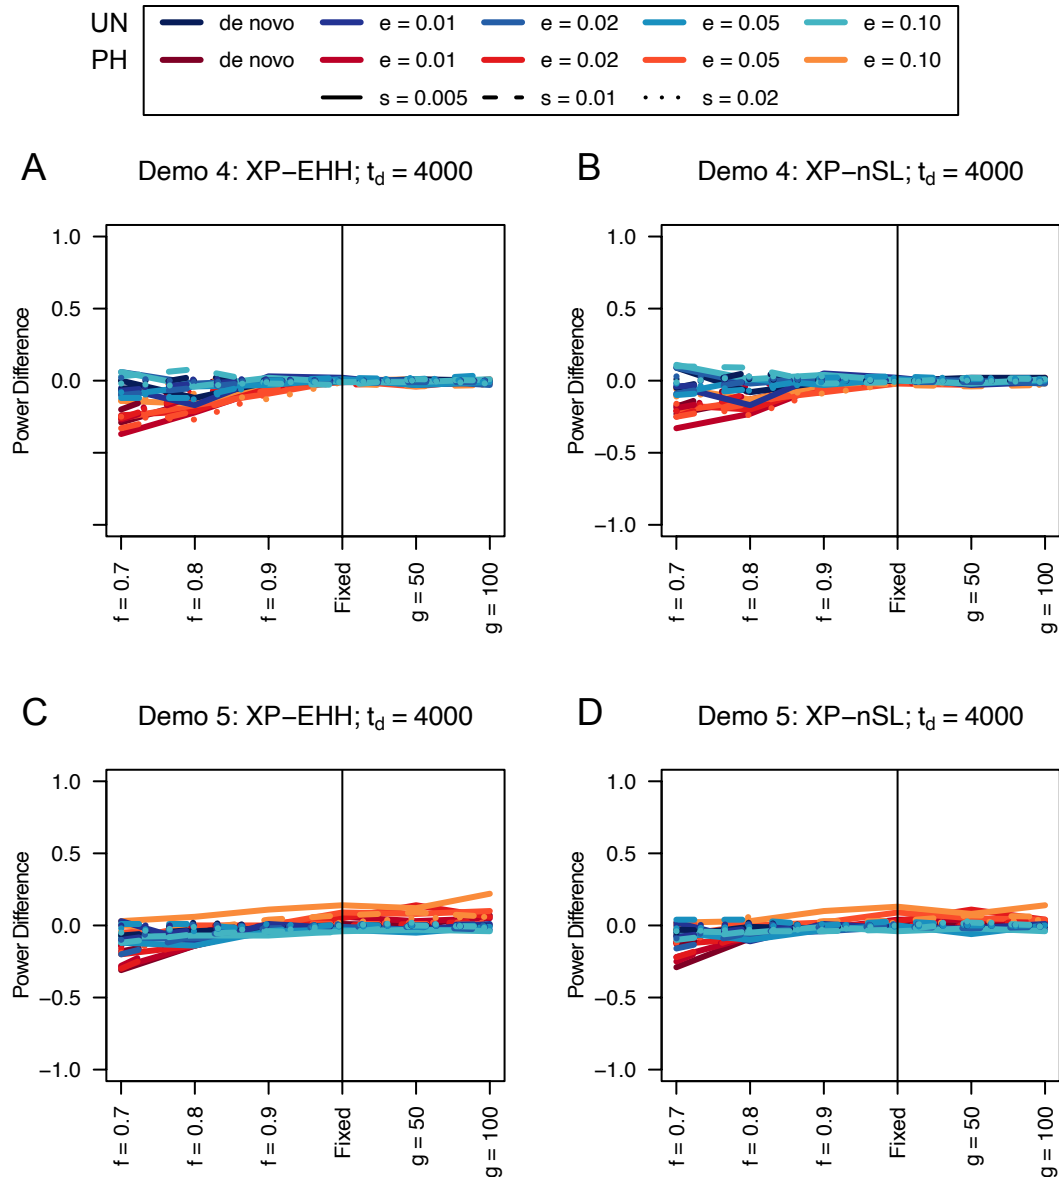

**Figure S53.** Power difference between unphased implementations of XP-EHH (A and C) and XP-nSL (B and D) and phased implementations. Blue curves represent the power difference between the unphased and phased statistics when applied to unphased data (UN). Red curves represent the power difference between the unphased and phased statistics when applied to perfectly phased data (PH). Values greater than 0 indicate the unphased statistic had higher power. Applied to demographic histories Demo 4 (A and B), and Demo 5 (C and D) with  $n = 20$  diploid samples from each population.  $s$  is the selection coefficient,  $f$  is the frequency of the adaptive allele at time of sampling,  $g$  is the number of generations at time of sampling since fixation,  $e$  is the frequency at which selection began, and  $t_d = 4000$  is the time in generations since the two populations diverged.

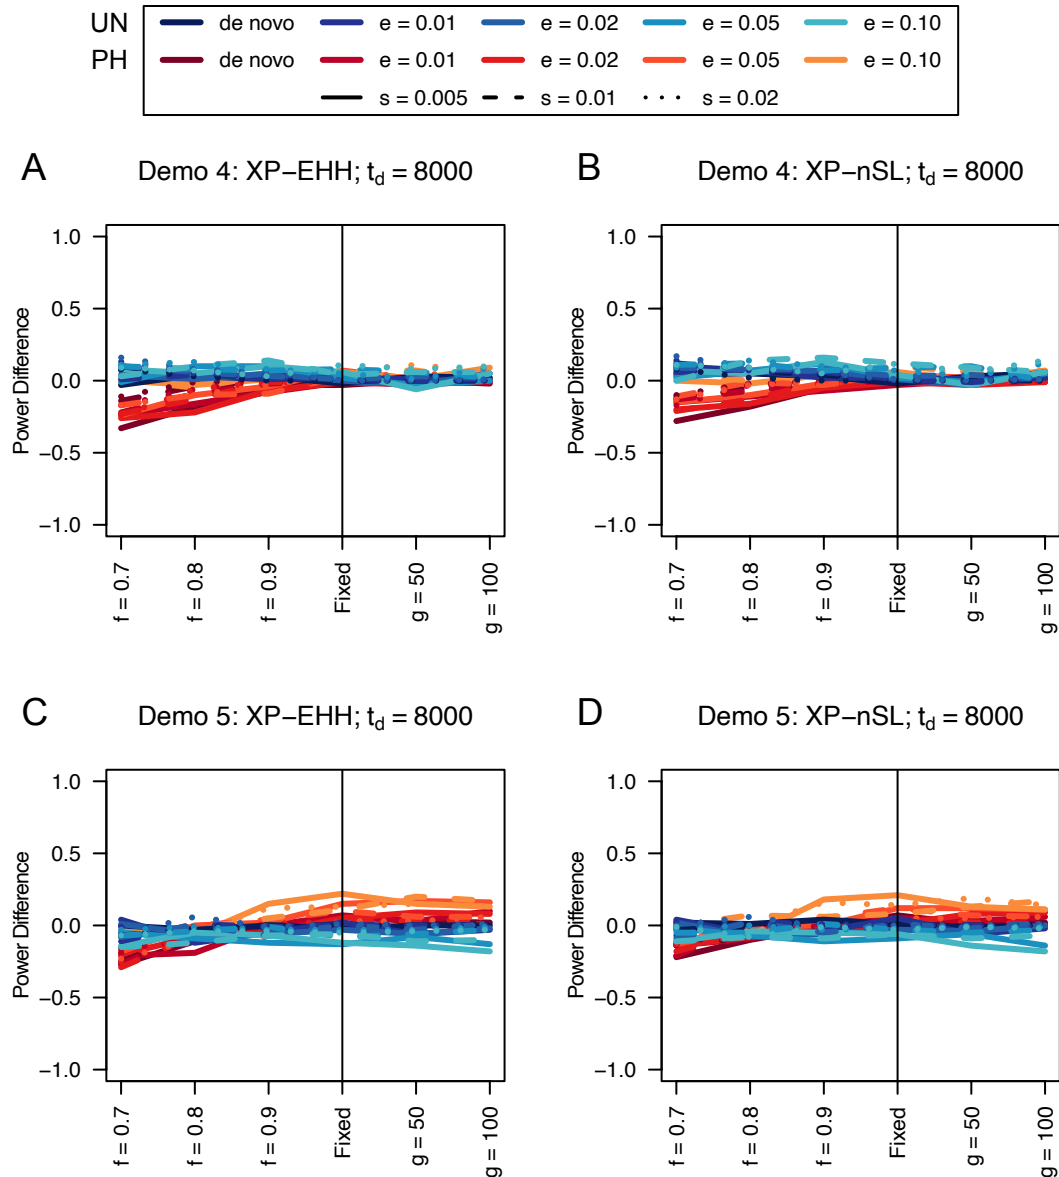

**Table S54.** Power difference between unphased implementations of XP-EHH (A and C) and XP-nSL (B and D) and phased implementations. Blue curves represent the power difference between the unphased and phased statistics when applied to unphased data (UN). Red curves represent the power difference between the unphased and phased statistics when applied to perfectly phased data (PH). Values greater than 0 indicate the unphased statistic had higher power. Applied to demographic histories Demo 4 (A and B), and Demo 5 (C and D) with  $n = 20$  diploid samples from each population.  $s$  is the selection coefficient,  $f$  is the frequency of the adaptive allele at time of sampling,  $g$  is the number of generations at time of sampling since fixation,  $e$  is the frequency at which selection began, and  $t_d = 8000$  is the time in generations since the two populations diverged.

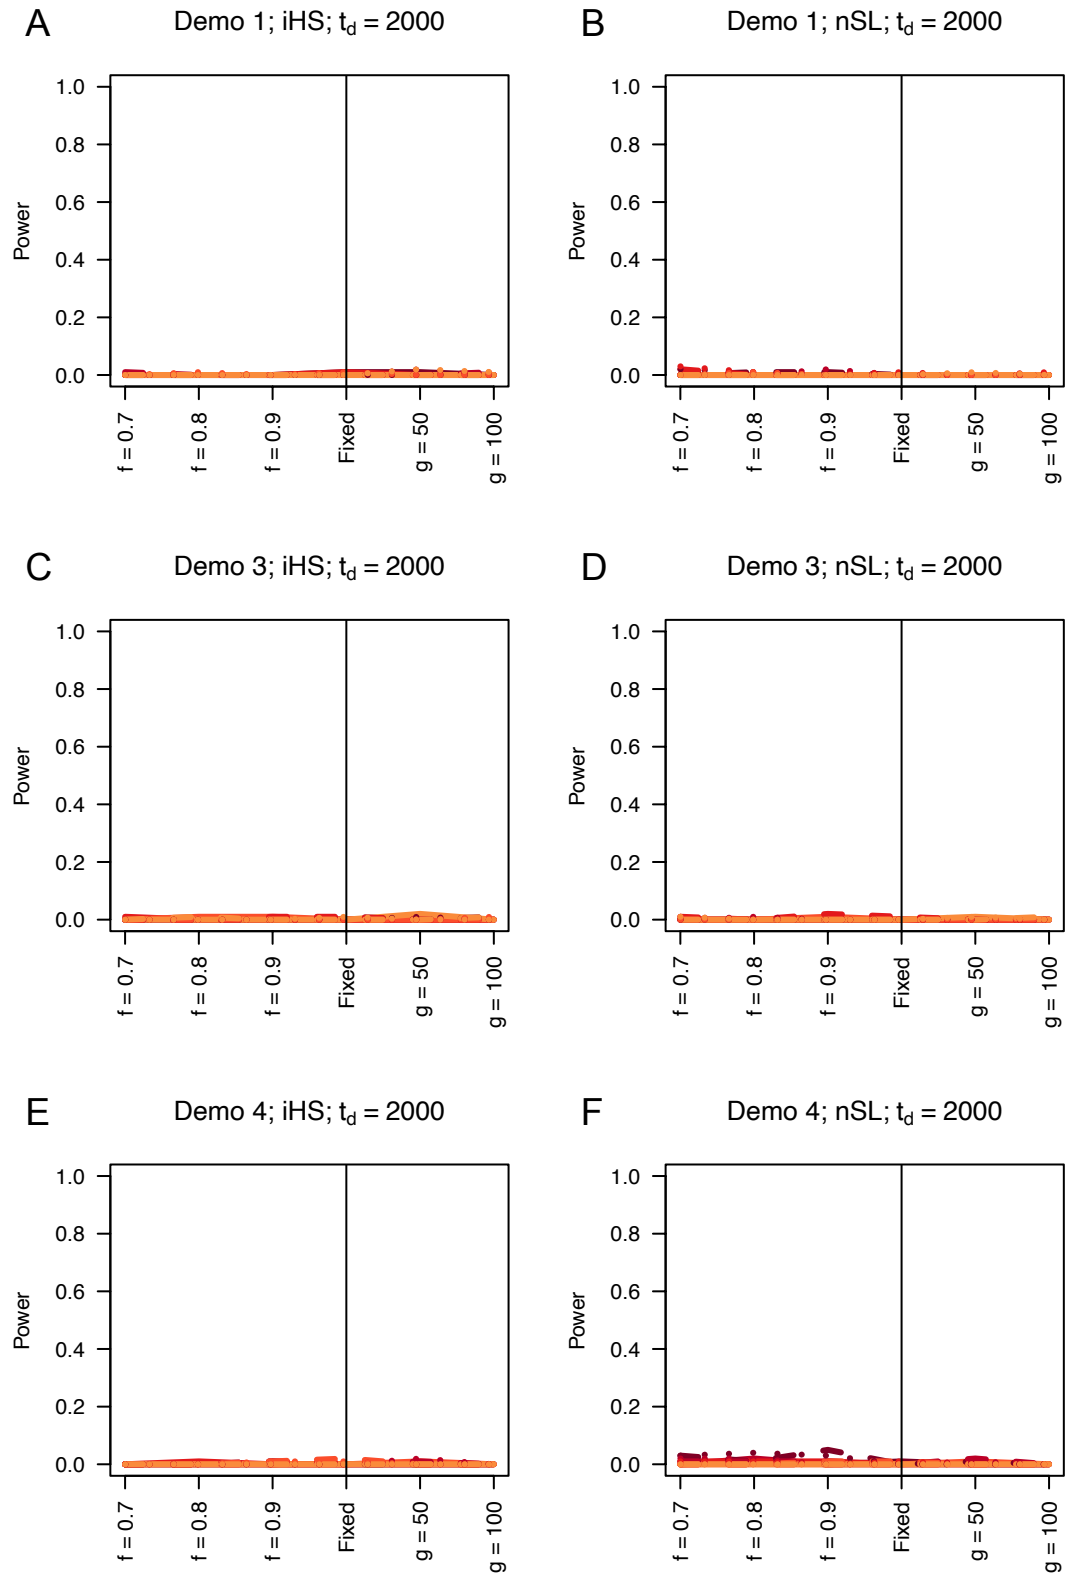

606 **Figure S55.** Power curves for unphased implementations of iHS (A, C, and E) and nSL (B, D, and F)  
607 under demographic histories Demo 1 (A and B), Demo 3 (C and D), and Demo 4 (E and F) with  $n = 10$   
608 diploid samples.  $s$  is the selection coefficient,  $f$  is the frequency of the adaptive allele at time of  
609 sampling,  $g$  is the number of generations at time of sampling since fixation,  $e$  is the frequency at which  
610 selection began, and  $t_d = 2000$  is the time in generations since the two populations diverged.

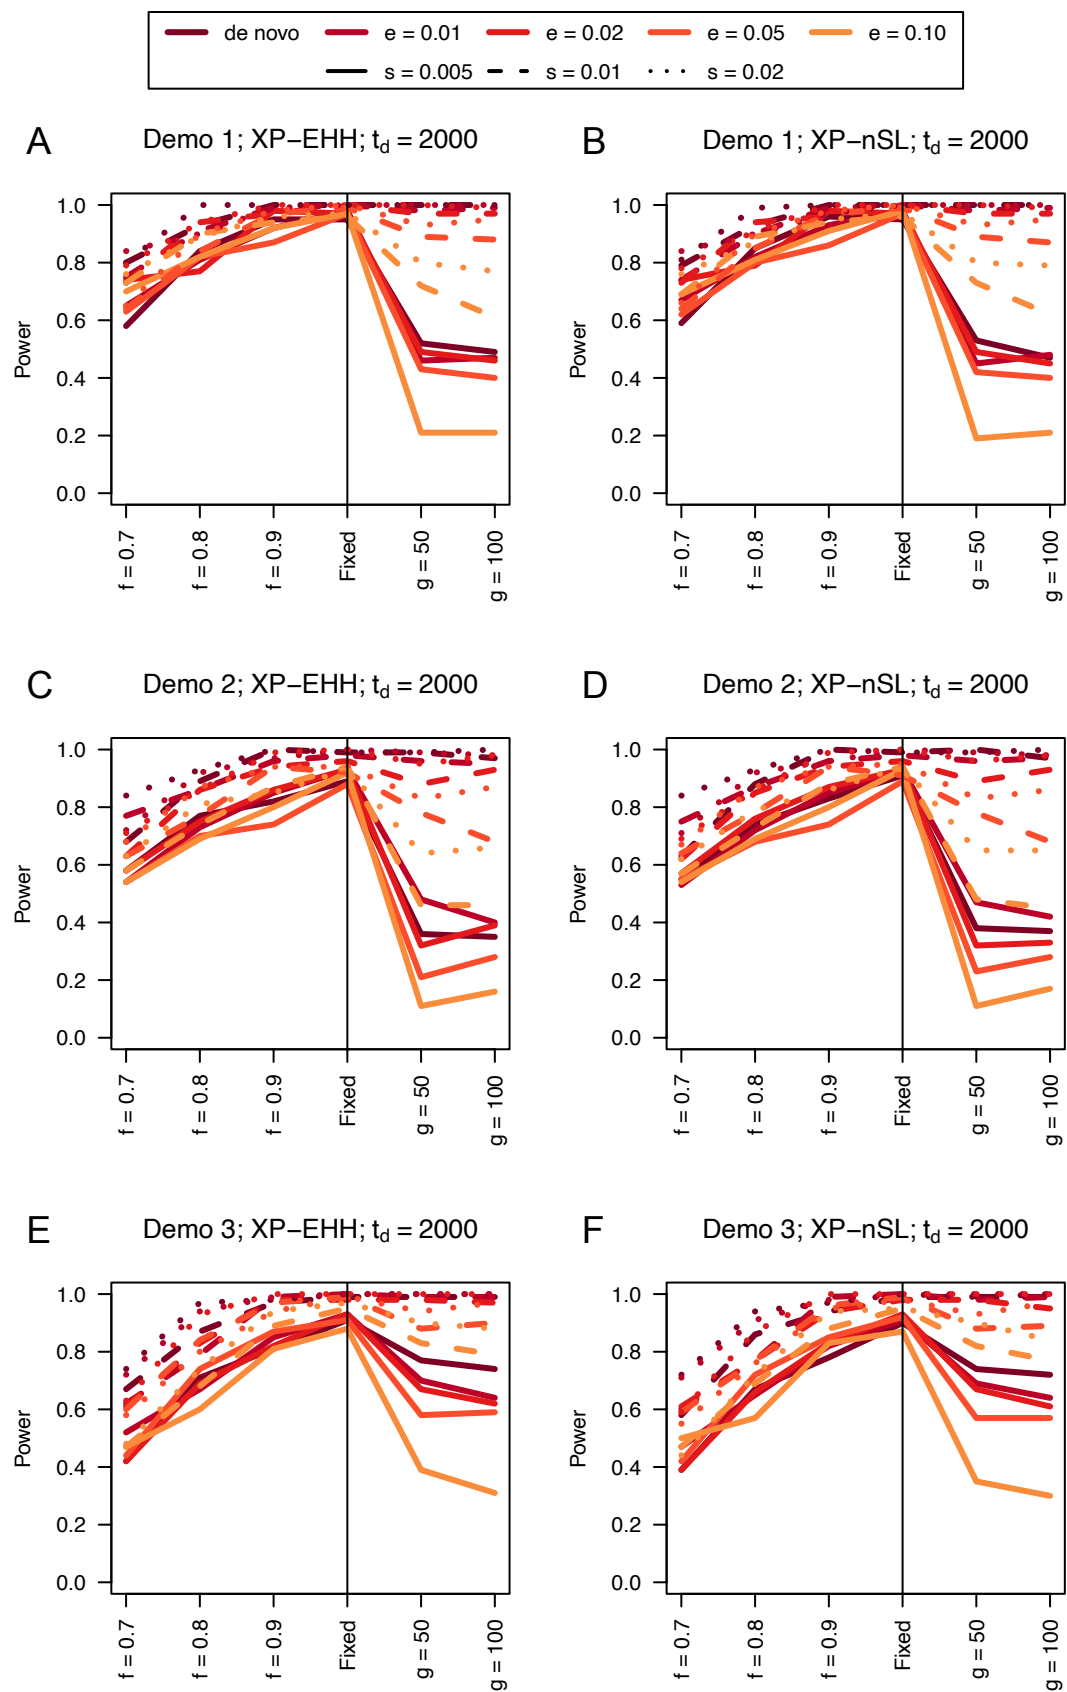

**Figure S56.** Power curves for unphased implementations of XP-EHH (A, C, and E) and XP-nSL (B, D, and F) under demographic histories Demo 1 (A and B), Demo 2 (C and D), and Demo 3 (E and F) with  $n = 10$  diploid samples from each population.  $s$  is the selection coefficient,  $f$  is the frequency of the adaptive allele at time of sampling,  $g$  is the number of generations at time of sampling since fixation,  $e$  is the frequency at which selection began, and  $t_d = 2000$  is the time in generations since the two populations diverged.

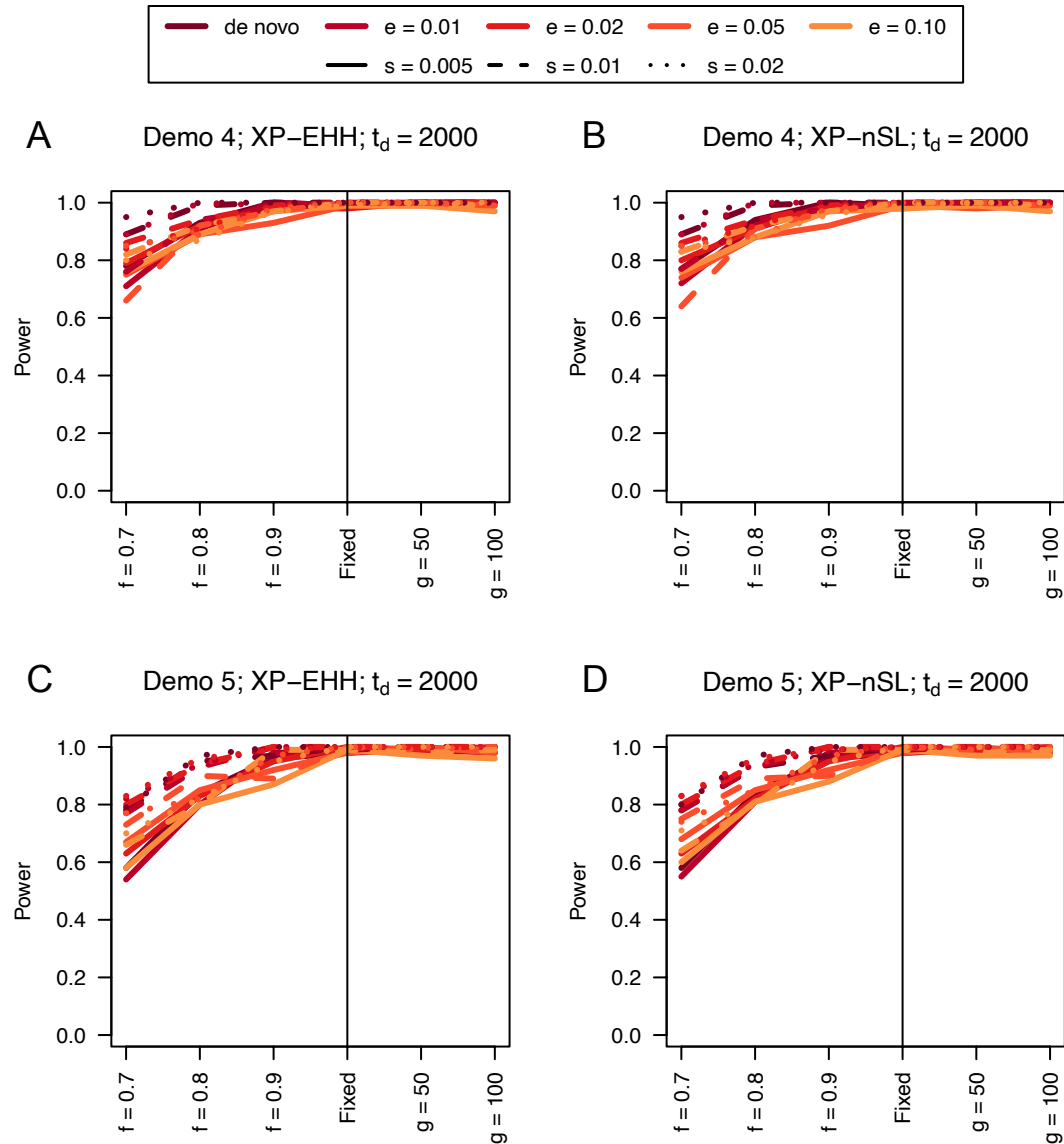

**Figure S57.** Power curves for unphased implementations of XP-EHH (A and C) and XP-nSL (B and D) under demographic histories Demo 4 (A and B), and Demo 5 (C and D) with  $n = 10$  diploid samples from each population.  $s$  is the selection coefficient,  $f$  is the frequency of the adaptive allele at time of sampling,  $g$  is the number of generations at time of sampling since fixation,  $e$  is the frequency at which selection began, and  $t_d = 2000$  is the time in generations since the two populations diverged.

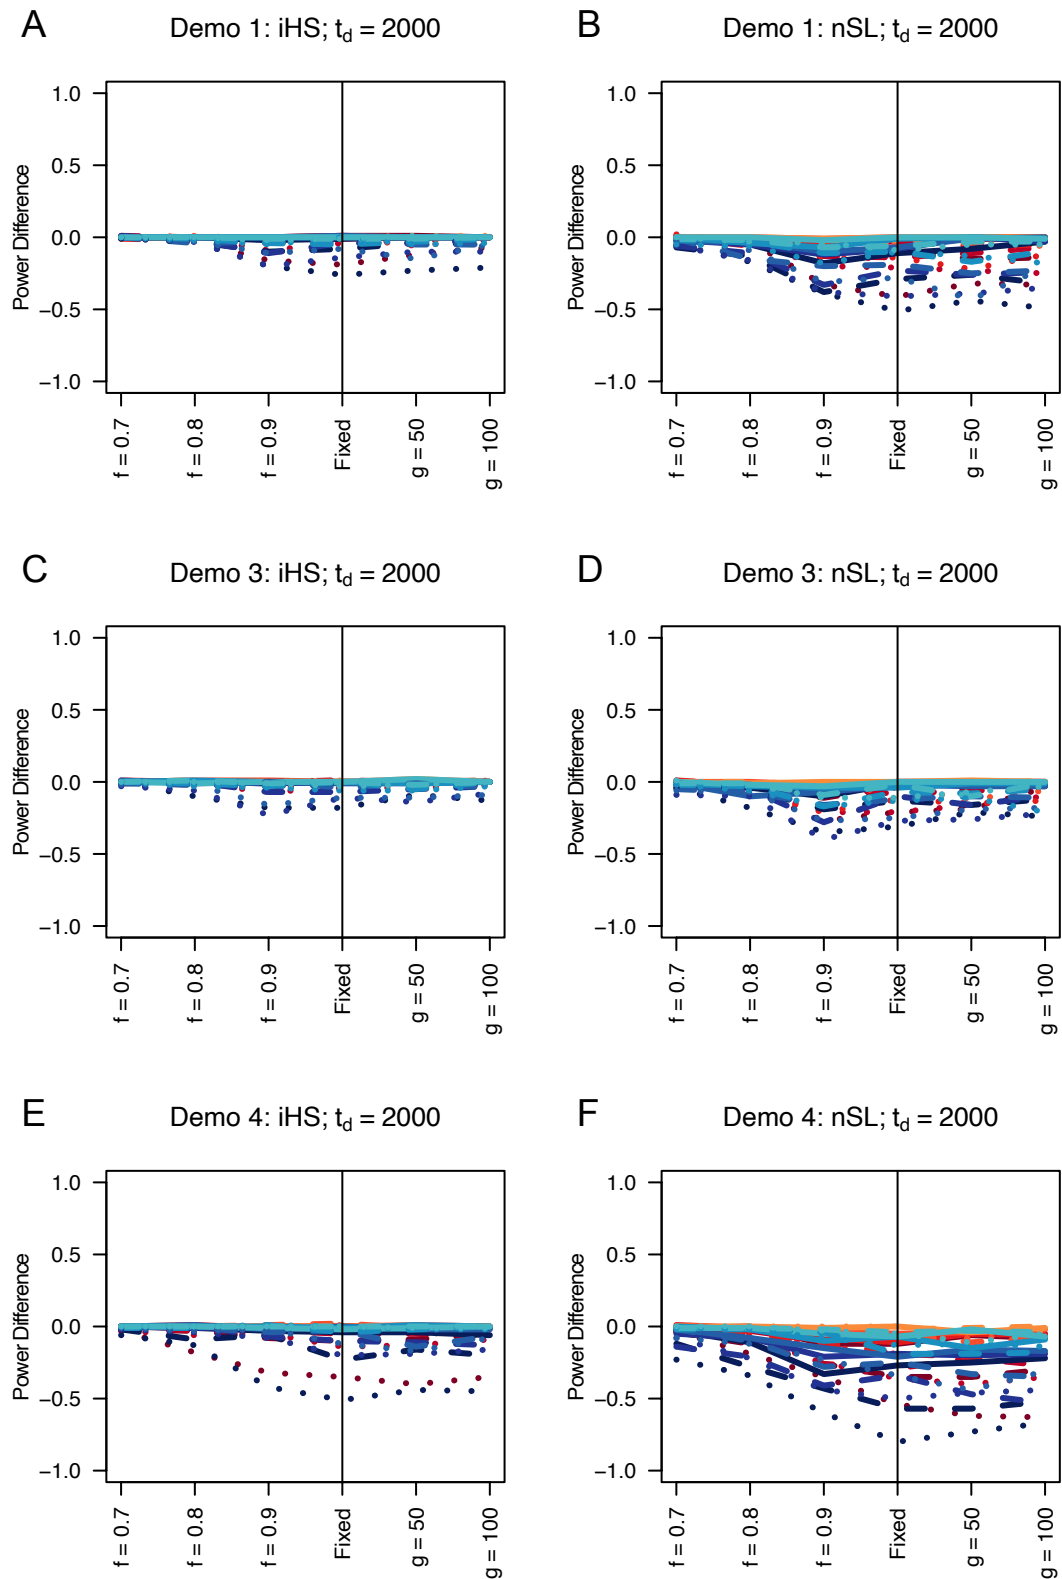

637 **Figure S58.** Power difference between unphased implementations of iHS (A, C, and E) and nSL (B, D,  
638 and F) and phased implementations. Blue curves represent the power difference between the unphased  
639 and phased statistics when applied to unphased data (UN). Red curves represent the power difference  
640 between the unphased and phased statistics when applied to perfectly phased data (PH). Values greater  
641 than 0 indicate the unphased statistic had higher power. Applied to demographic histories Demo 1 (A and  
642 B), Demo 3 (C and D), and Demo 4 (E and F) with  $n = 10$  diploid samples.  $s$  is the selection coefficient,  $f$   
643 is the frequency of the adaptive allele at time of sampling,  $g$  is the number of generations at time of  
644 sampling since fixation,  $e$  is the frequency at which selection began, and  $t_d = 2000$  is the time in  
645 generations since the two populations diverged.

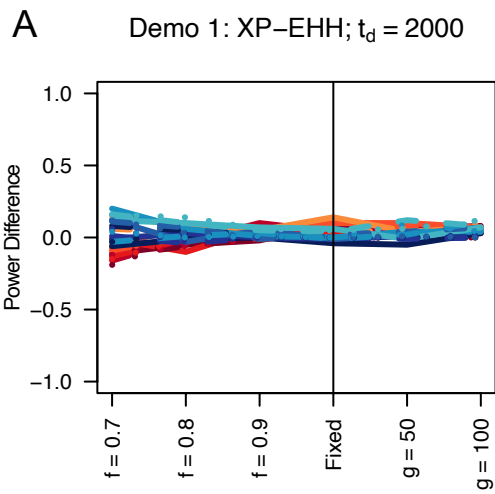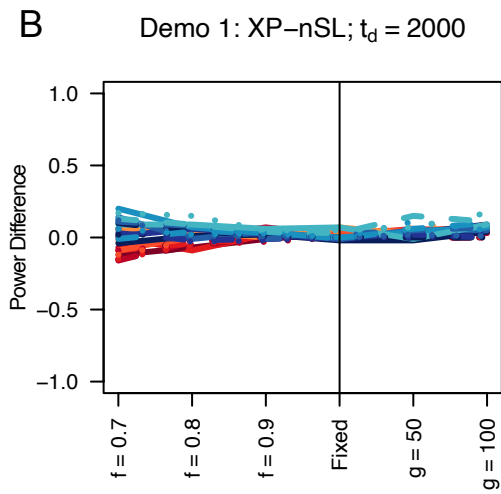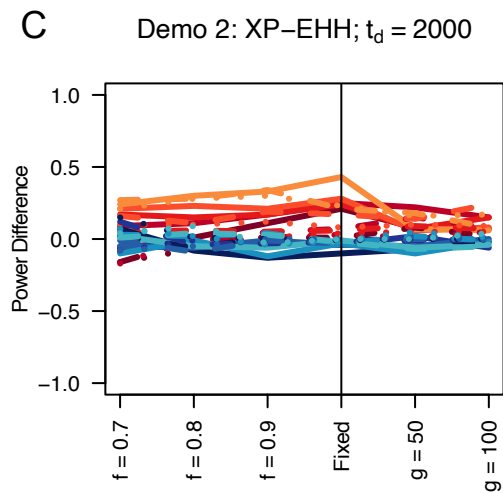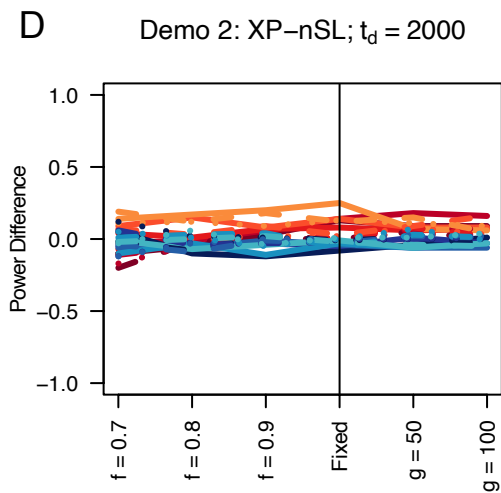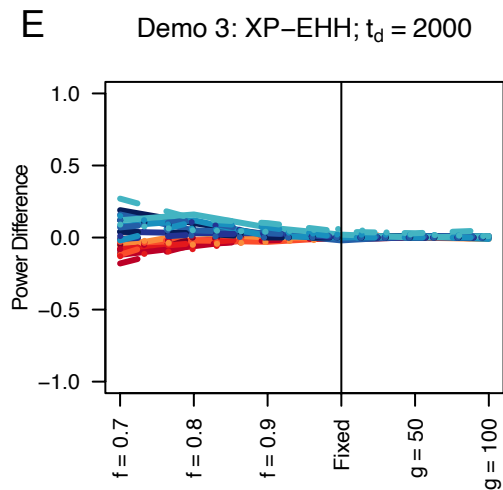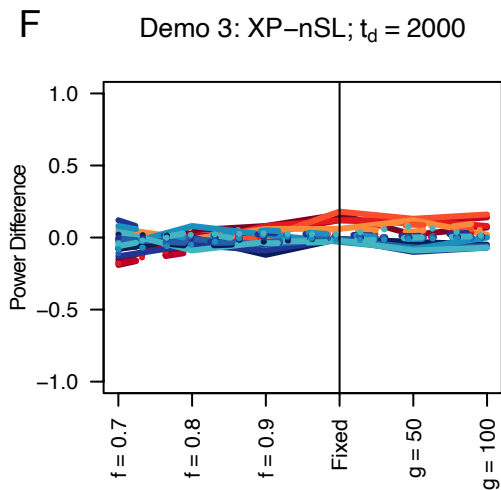

**Figure S59.** Power difference between unphased implementations of XP-EHH (A, C, and E) and XP-nSL (B, D, and F) and phased implementations. Blue curves represent the power difference between the unphased and phased statistics when applied to unphased data (UN). Red curves represent the power difference between the unphased and phased statistics when applied to perfectly phased data (PH). Values greater than 0 indicate the unphased statistic had higher power. Applied to demographic histories Demo 1 (A and B), Demo 2 (C and D), and Demo 3 (E and F) with  $n = 10$  diploid samples from each population.  $s$  is the selection coefficient,  $f$  is the frequency of the adaptive allele at time of sampling,  $g$  is the number of generations at time of sampling since fixation,  $e$  is the frequency at which selection began, and  $t_d = 2000$  is the time in generations since the two populations diverged.

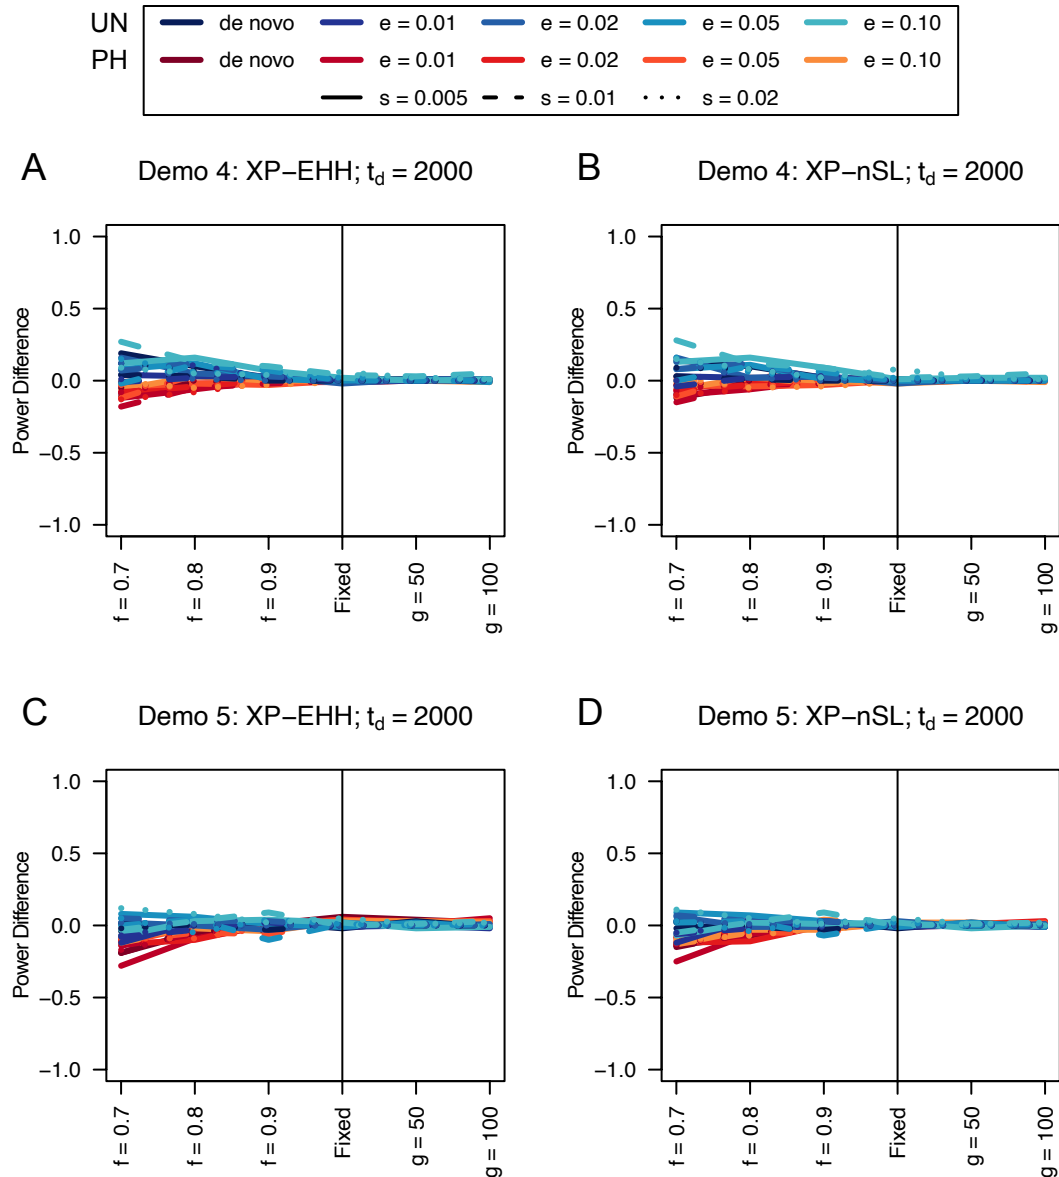

**Figure S60.** Power difference between unphased implementations of XP-EHH (A and C) and XP-nSL (B and D) and phased implementations. Blue curves represent the power difference between the unphased and phased statistics when applied to unphased data (UN). Red curves represent the power difference between the unphased and phased statistics when applied to perfectly phased data (PH). Values greater than 0 indicate the unphased statistic had higher power. Applied to demographic histories Demo 4 (A and B), and Demo 5 (C and D) with  $n = 10$  diploid samples from each population.  $s$  is the selection coefficient,  $f$  is the frequency of the adaptive allele at time of sampling,  $g$  is the number of generations at time of sampling since fixation,  $e$  is the frequency at which selection began, and  $t_d = 2000$  is the time in generations since the two populations diverged.

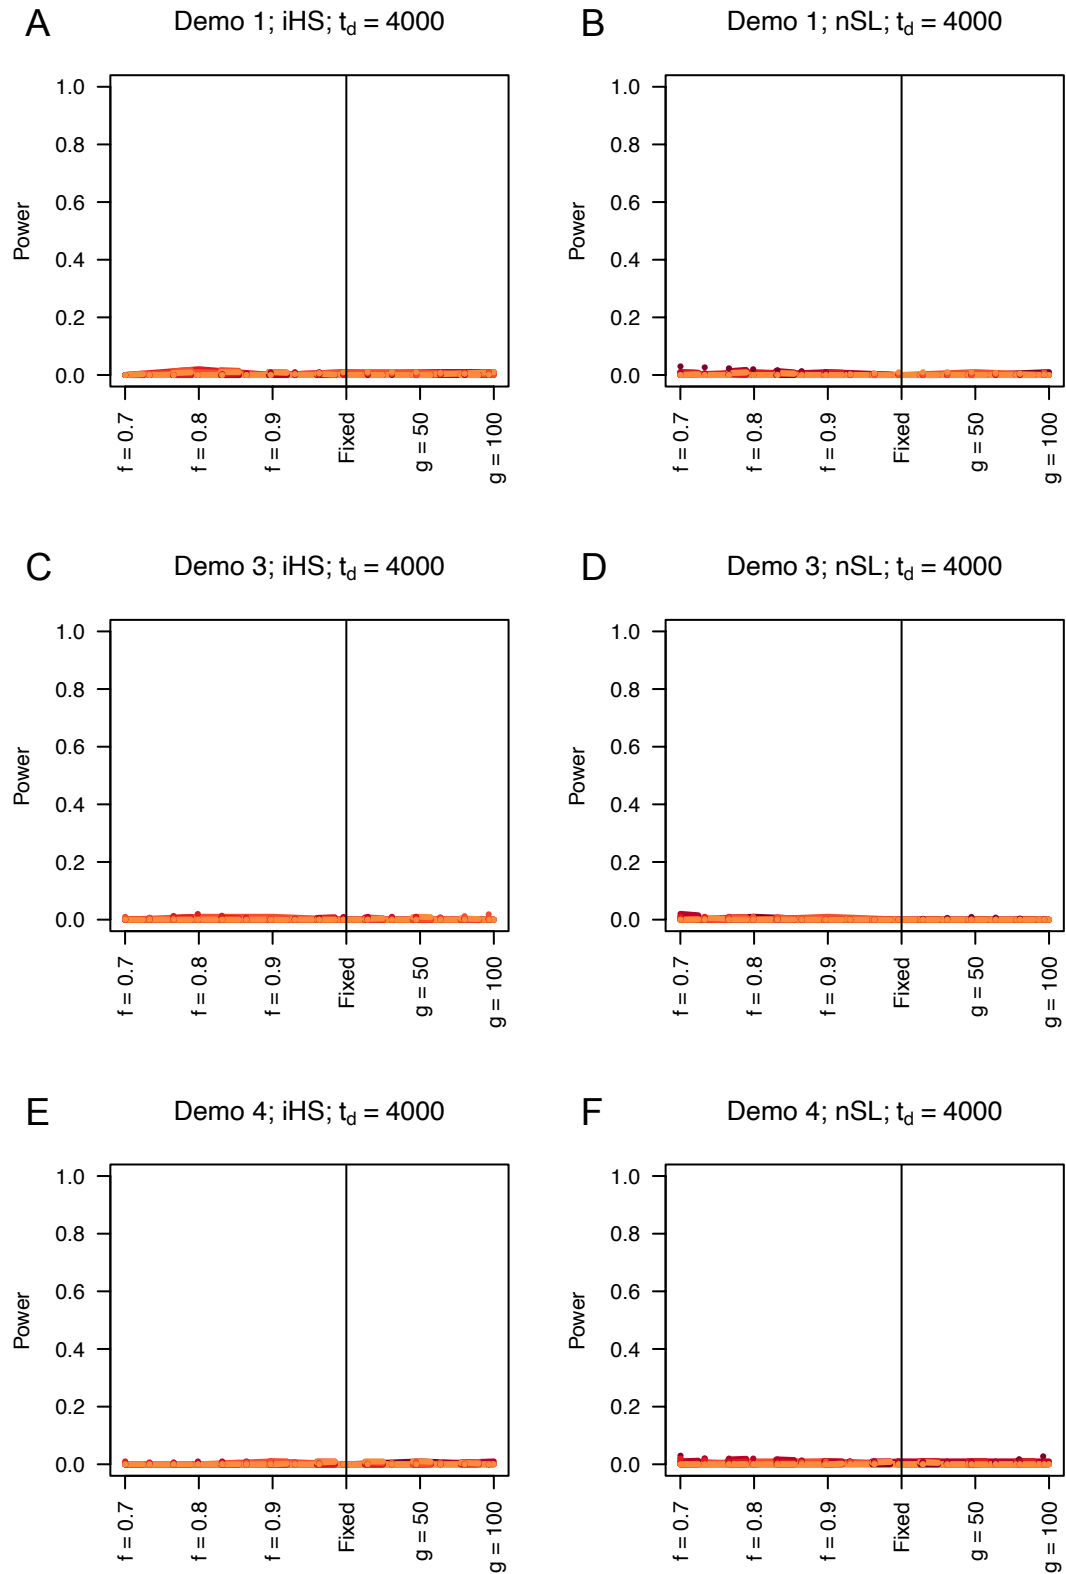

675 **Figure S61.** Power curves for unphased implementations of iHS (A, C, and E) and nSL (B, D, and F)  
676 under demographic histories Demo 1 (A and B), Demo 3 (C and D), and Demo 4 (E and F) with  $n = 10$   
677 diploid samples.  $s$  is the selection coefficient,  $f$  is the frequency of the adaptive allele at time of  
678 sampling,  $g$  is the number of generations at time of sampling since fixation,  $e$  is the frequency at which  
679 selection began, and  $t_d = 4000$  is the time in generations since the two populations diverged.

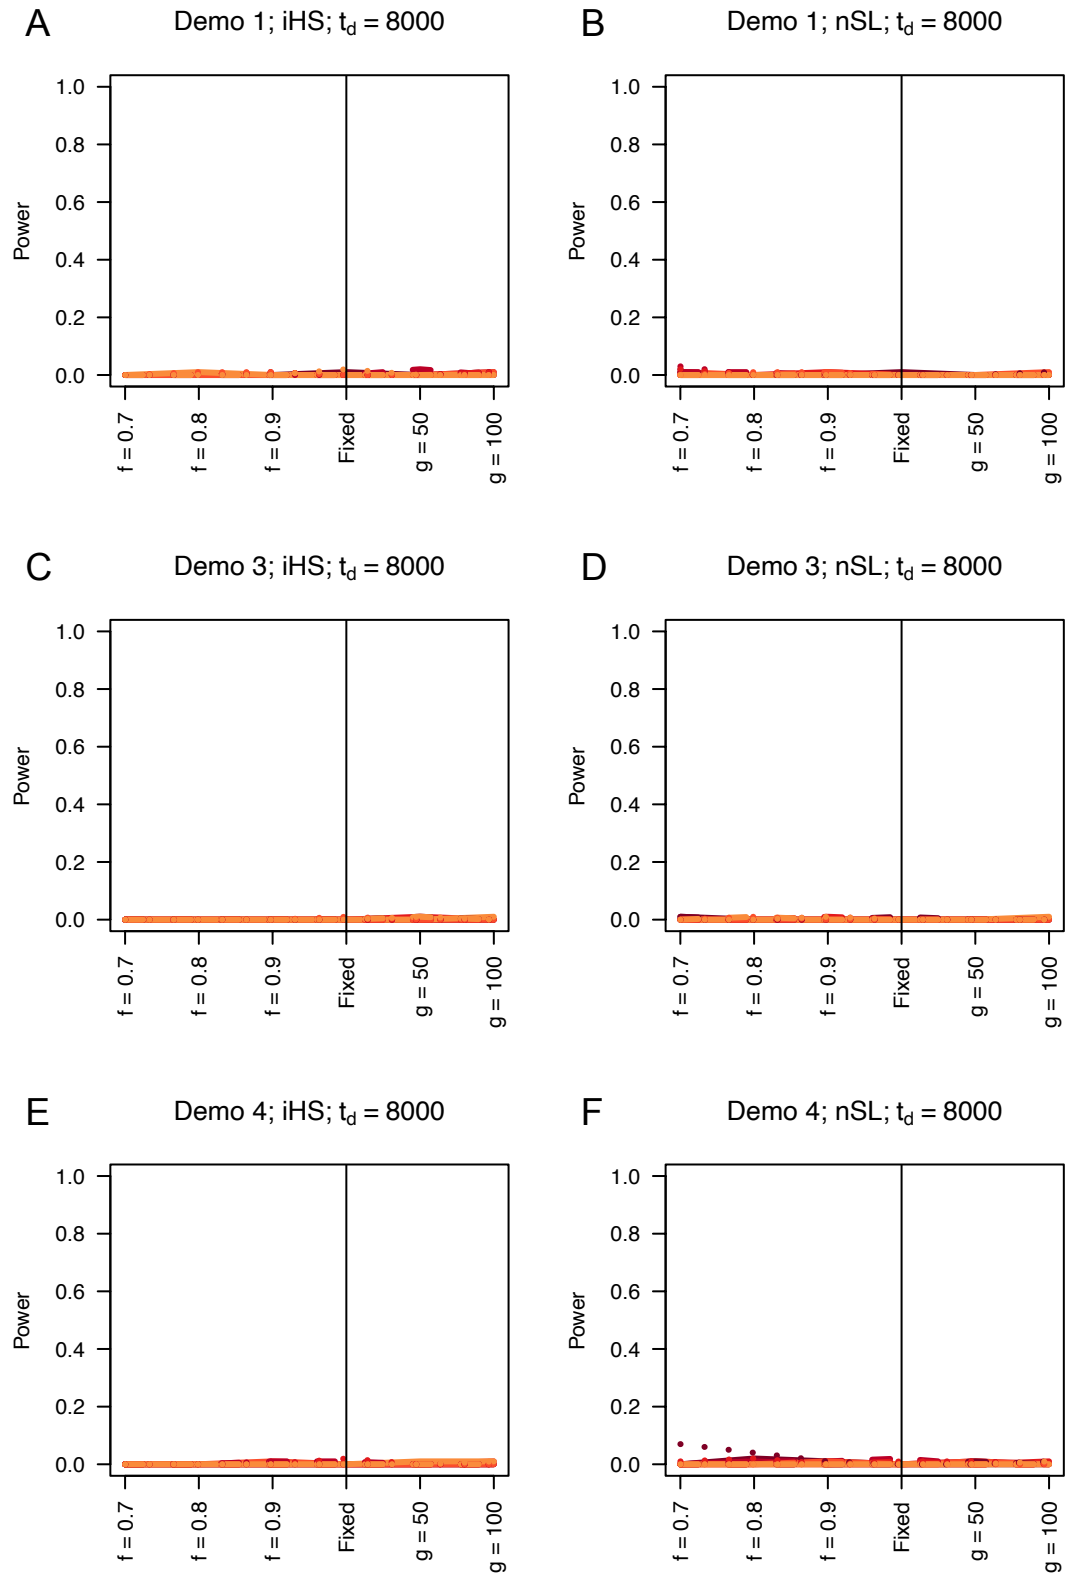

681 **Figure S62.** Power curves for unphased implementations of iHS (A, C, and E) and nSL (B, D, and F)  
682 under demographic histories Demo 1 (A and B), Demo 3 (C and D), and Demo 4 (E and F) with  $n = 10$   
683 diploid samples.  $s$  is the selection coefficient,  $f$  is the frequency of the adaptive allele at time of  
684 sampling,  $g$  is the number of generations at time of sampling since fixation,  $e$  is the frequency at which  
685 selection began, and  $t_d = 8000$  is the time in generations since the two populations diverged.

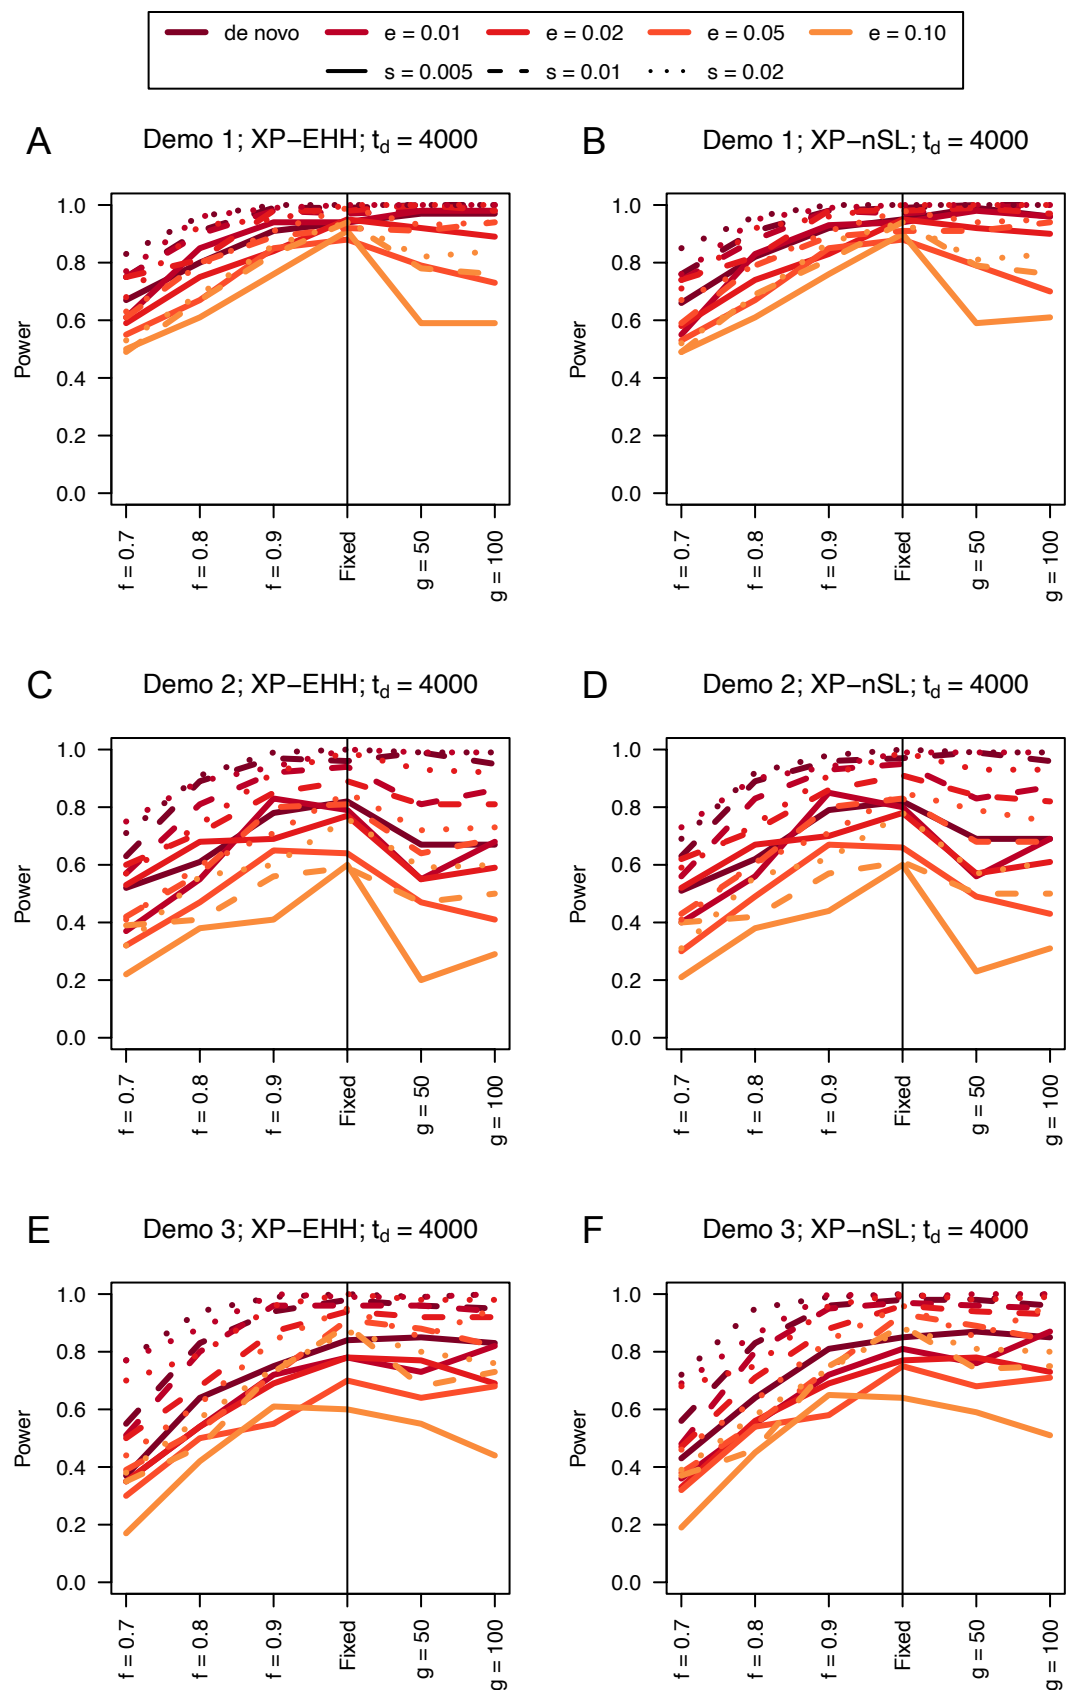

**Figure S63.** Power difference between unphased implementations of XP-EHH (A, C, and E) and XP-nSL (B, D, and F) and phased implementations. Blue curves represent the power difference between the unphased and phased statistics when applied to unphased data (UN). Red curves represent the power difference between the unphased and phased statistics when applied to perfectly phased data (PH). Values greater than 0 indicate the unphased statistic had higher power. Applied to demographic histories Demo 1 (A and B), Demo 2 (C and D), and Demo 3 (E and F) with  $n = 10$  diploid samples from each population.  $s$  is the selection coefficient,  $f$  is the frequency of the adaptive allele at time of sampling,  $g$  is the number of generations at time of sampling since fixation,  $e$  is the frequency at which selection began, and  $t_d = 4000$  is the time in generations since the two populations diverged.

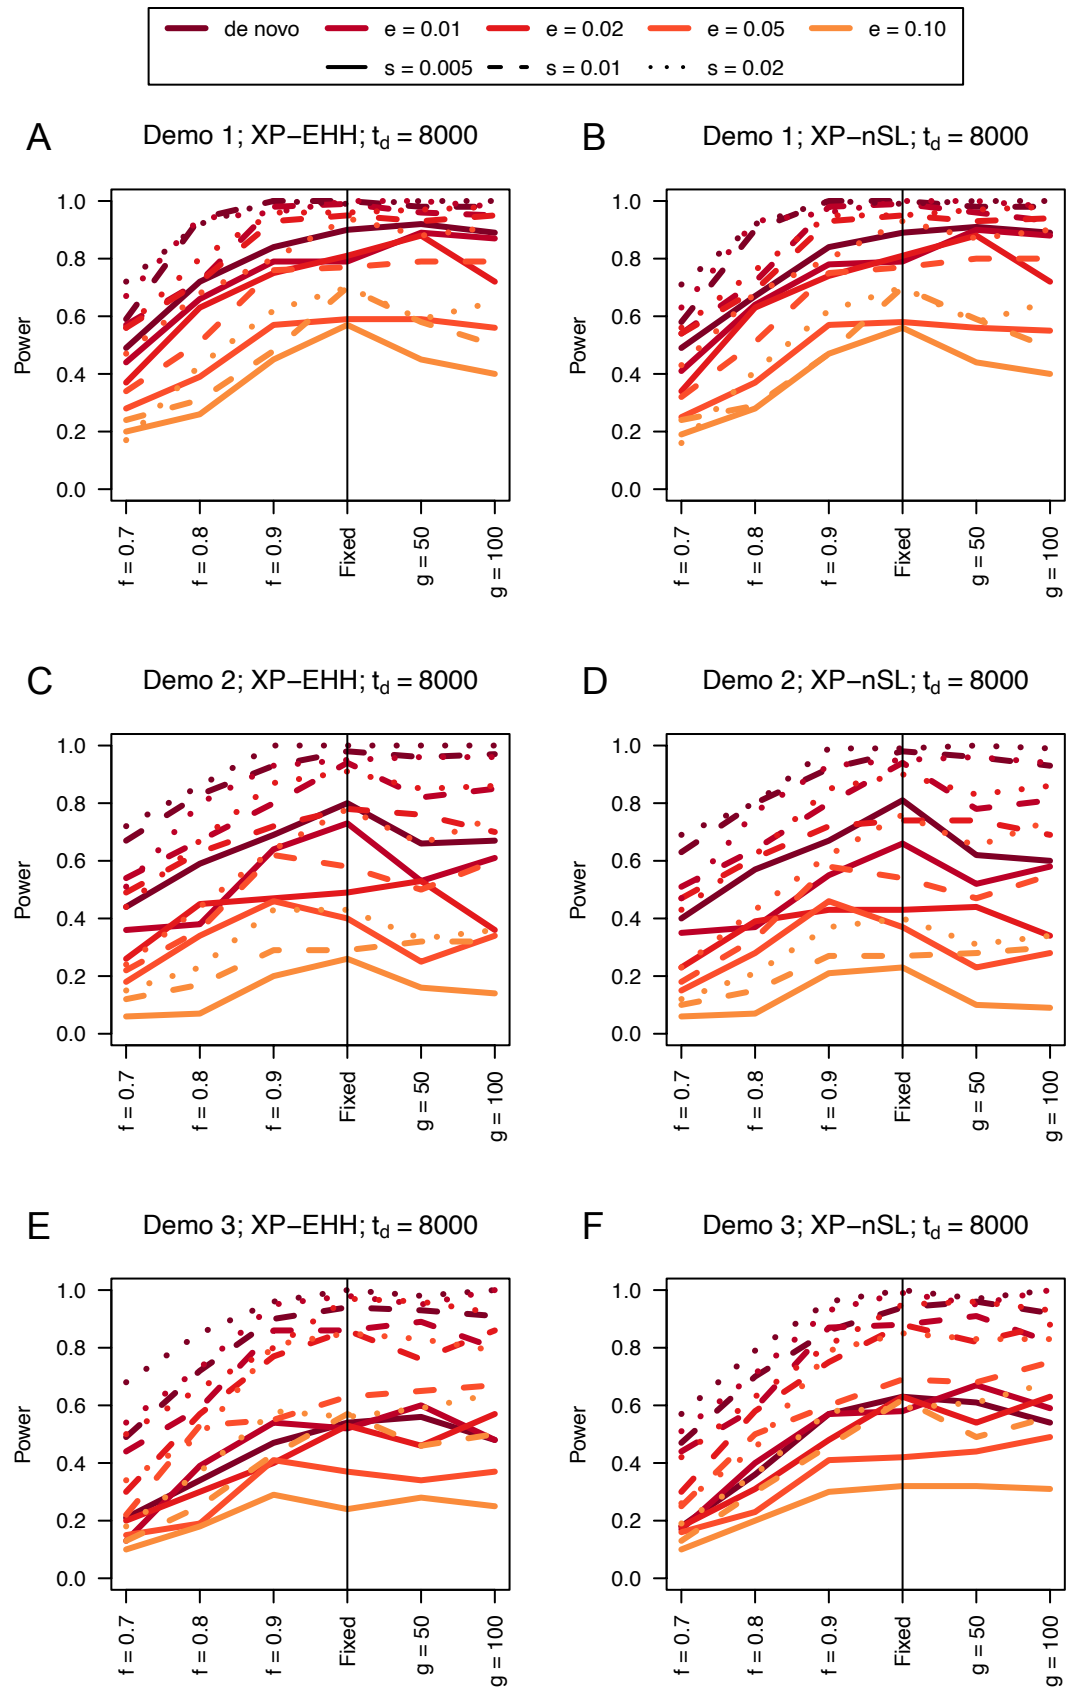

**Figure S64.** Power difference between unphased implementations of XP-EHH (A, C, and E) and XP-nSL (B, D, and F) and phased implementations. Blue curves represent the power difference between the unphased and phased statistics when applied to unphased data (UN). Red curves represent the power difference between the unphased and phased statistics when applied to perfectly phased data (PH). Values greater than 0 indicate the unphased statistic had higher power. Applied to demographic histories Demo 1 (A and B), Demo 2 (C and D), and Demo 3 (E and F) with  $n = 10$  diploid samples from each population.  $s$  is the selection coefficient,  $f$  is the frequency of the adaptive allele at time of sampling,  $g$  is the number of generations at time of sampling since fixation,  $e$  is the frequency at which selection began, and  $t_d = 8000$  is the time in generations since the two populations diverged.

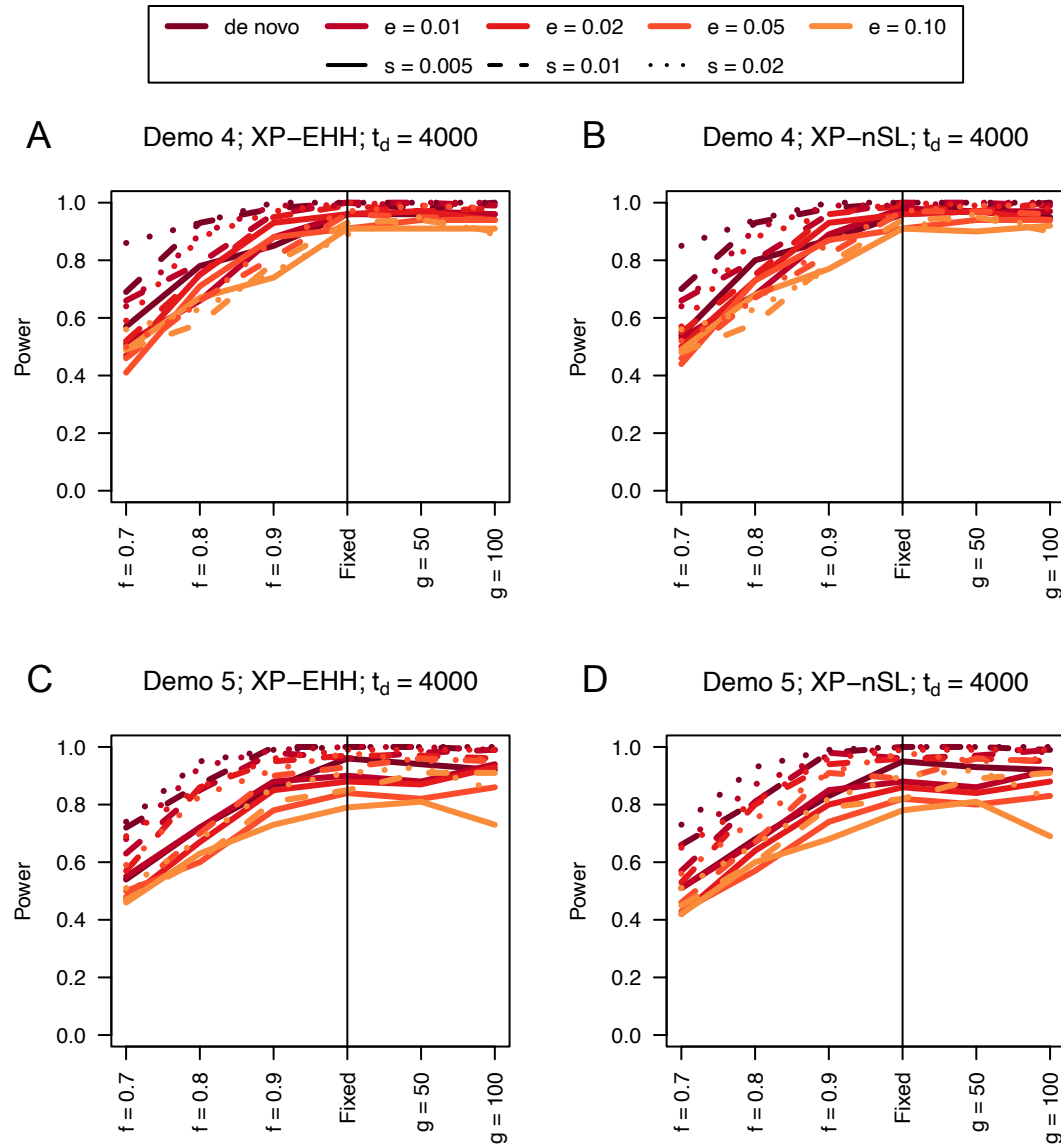

**Figure S65.** Power curves for unphased implementations of XP-EHH (A and C) and XP-nSL (B and D) under demographic histories Demo 4 (A and B), and Demo 5 (C and D) with  $n = 10$  diploid samples from each population.  $s$  is the selection coefficient,  $f$  is the frequency of the adaptive allele at time of sampling,  $g$  is the number of generations at time of sampling since fixation,  $e$  is the frequency at which selection began, and  $t_d = 4000$  is the time in generations since the two populations diverged.

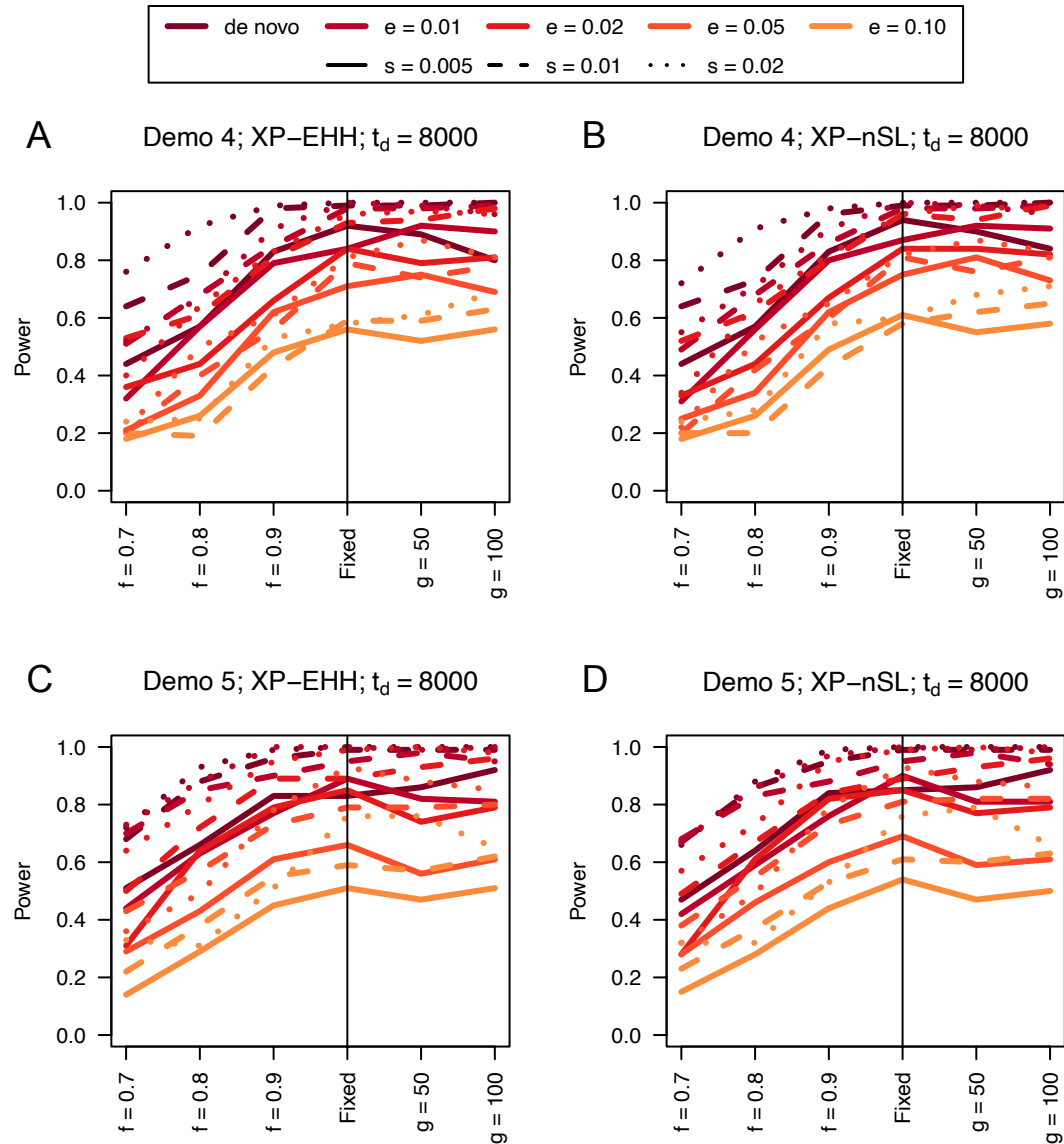

**Figure S66.** Power curves for unphased implementations of XP-EHH (A and C) and XP-nSL (B and D) under demographic histories Demo 4 (A and B), and Demo 5 (C and D) with  $n = 10$  diploid samples from each population.  $s$  is the selection coefficient,  $f$  is the frequency of the adaptive allele at time of sampling,  $g$  is the number of generations at time of sampling since fixation,  $e$  is the frequency at which selection began, and  $t_d = 8000$  is the time in generations since the two populations diverged.

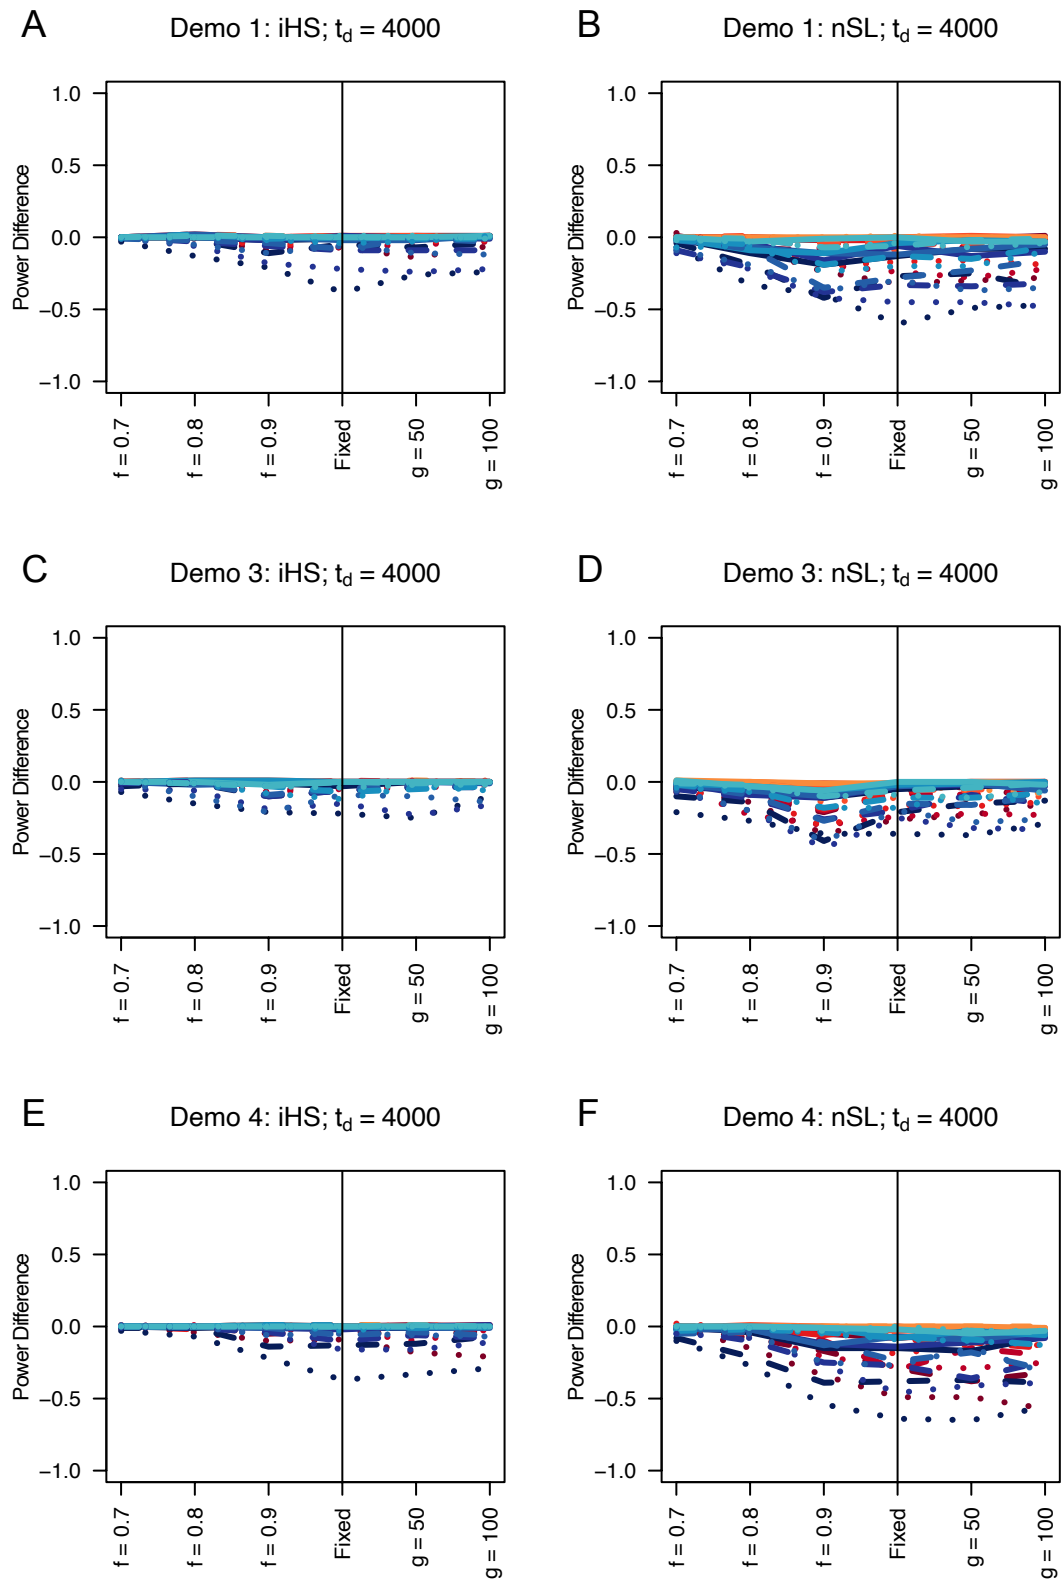

**Figure S67.** Power difference between unphased implementations of iHS (A, C, and E) and nSL (B, D, and F) and phased implementations. Blue curves represent the power difference between the unphased and phased statistics when applied to unphased data (UN). Red curves represent the power difference between the unphased and phased statistics when applied to perfectly phased data (PH). Values greater than 0 indicate the unphased statistic had higher power. Applied to demographic histories Demo 1 (A and B), Demo 3 (C and D), and Demo 4 (E and F) with  $n = 10$  diploid samples.  $s$  is the selection coefficient,  $f$  is the frequency of the adaptive allele at time of sampling,  $g$  is the number of generations at time of sampling since fixation,  $e$  is the frequency at which selection began, and  $t_d = 4000$  is the time in generations since the two populations diverged.

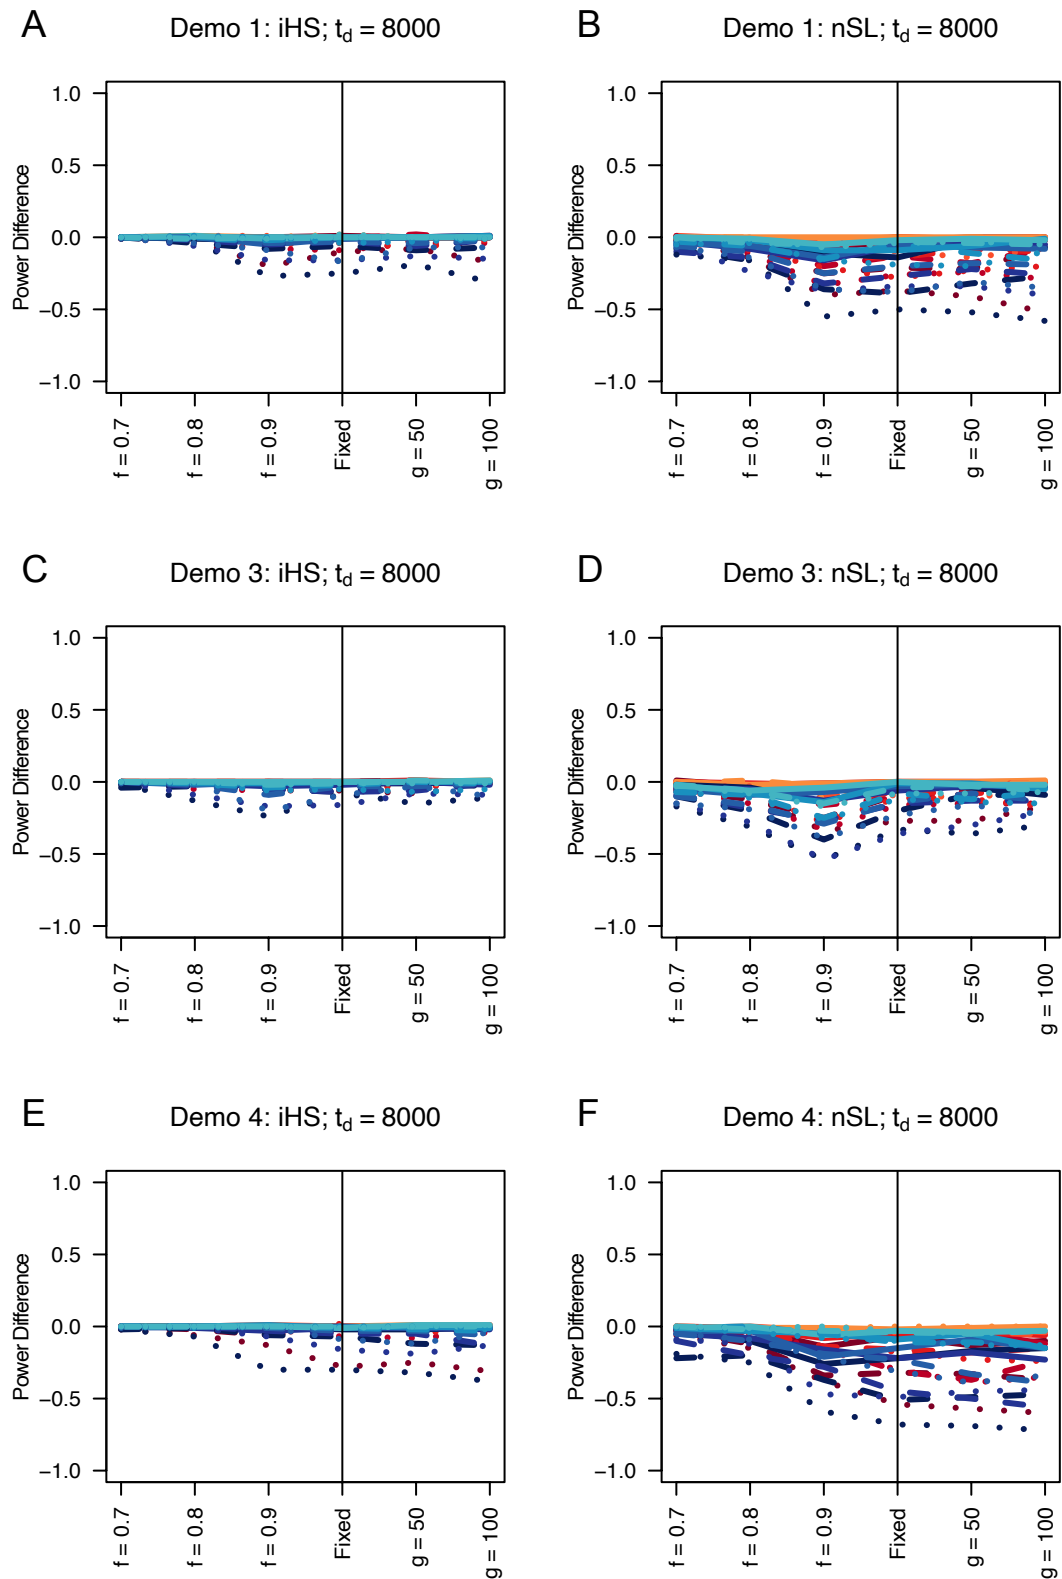

**Figure S68.** Power difference between unphased implementations of iHS (A, C, and E) and nSL (B, D, and F) and phased implementations. Blue curves represent the power difference between the unphased and phased statistics when applied to unphased data (UN). Red curves represent the power difference between the unphased and phased statistics when applied to perfectly phased data (PH). Values greater than 0 indicate the unphased statistic had higher power. Applied to demographic histories Demo 1 (A and B), Demo 3 (C and D), and Demo 4 (E and F) with  $n = 10$  diploid samples.  $s$  is the selection coefficient,  $f$  is the frequency of the adaptive allele at time of sampling,  $g$  is the number of generations at time of sampling since fixation,  $e$  is the frequency at which selection began, and  $t_d = 8000$  is the time in generations since the two populations diverged.



**A** Demo 1: XP-EHH;  $t_d = 4000$

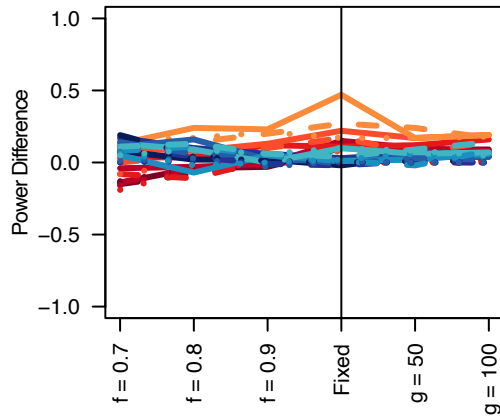

**B** Demo 1: XP-nSL;  $t_d = 4000$

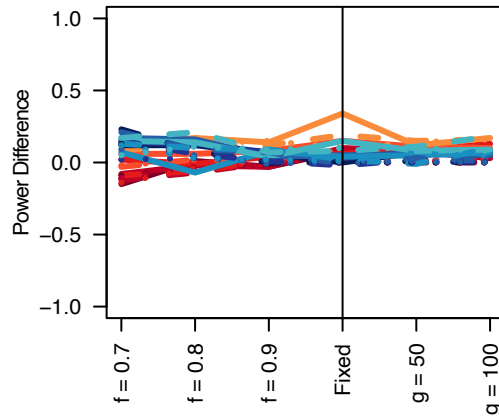

**C** Demo 2: XP-EHH;  $t_d = 4000$

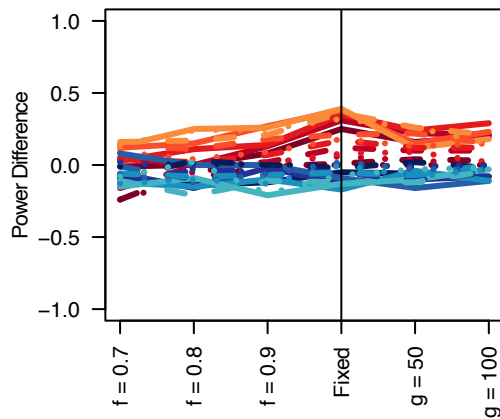

**D** Demo 2: XP-nSL;  $t_d = 4000$

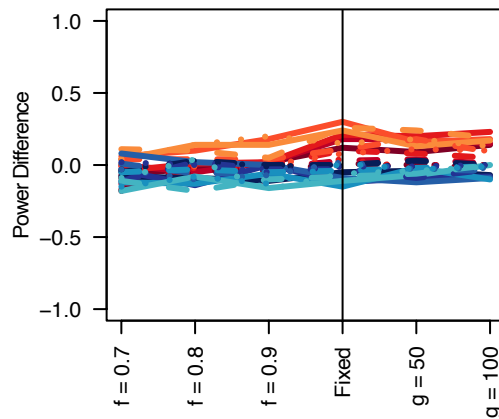

**E** Demo 3: XP-EHH;  $t_d = 4000$

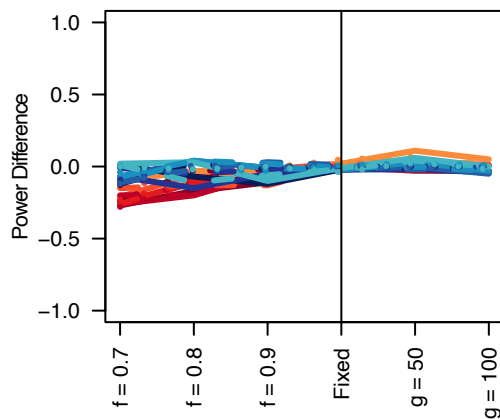

**F** Demo 3: XP-nSL;  $t_d = 4000$

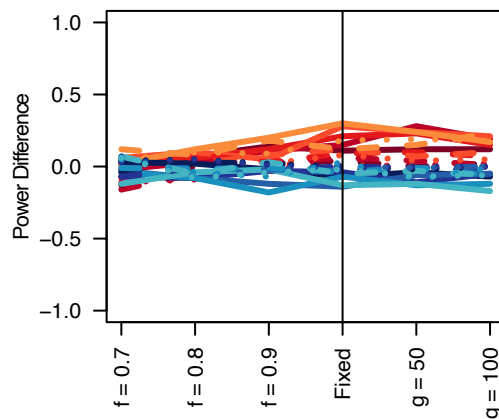

**Figure S69.** Power difference between unphased implementations of XP-EHH (A, C, and E) and XP-nSL (B, D, and F) and phased implementations. Blue curves represent the power difference between the unphased and phased statistics when applied to unphased data (UN). Red curves represent the power difference between the unphased and phased statistics when applied to perfectly phased data (PH). Values greater than 0 indicate the unphased statistic had higher power. Applied to demographic histories Demo 1 (A and B), Demo 2 (C and D), and Demo 3 (E and F) with  $n = 10$  diploid samples from each population.  $s$  is the selection coefficient,  $f$  is the frequency of the adaptive allele at time of sampling,  $g$  is the number of generations at time of sampling since fixation,  $e$  is the frequency at which selection began, and  $t_d = 4000$  is the time in generations since the two populations diverged.

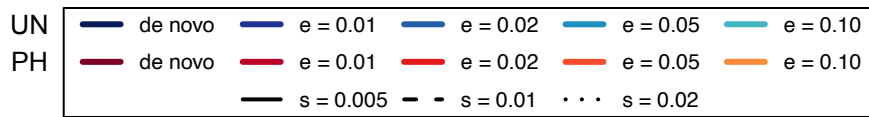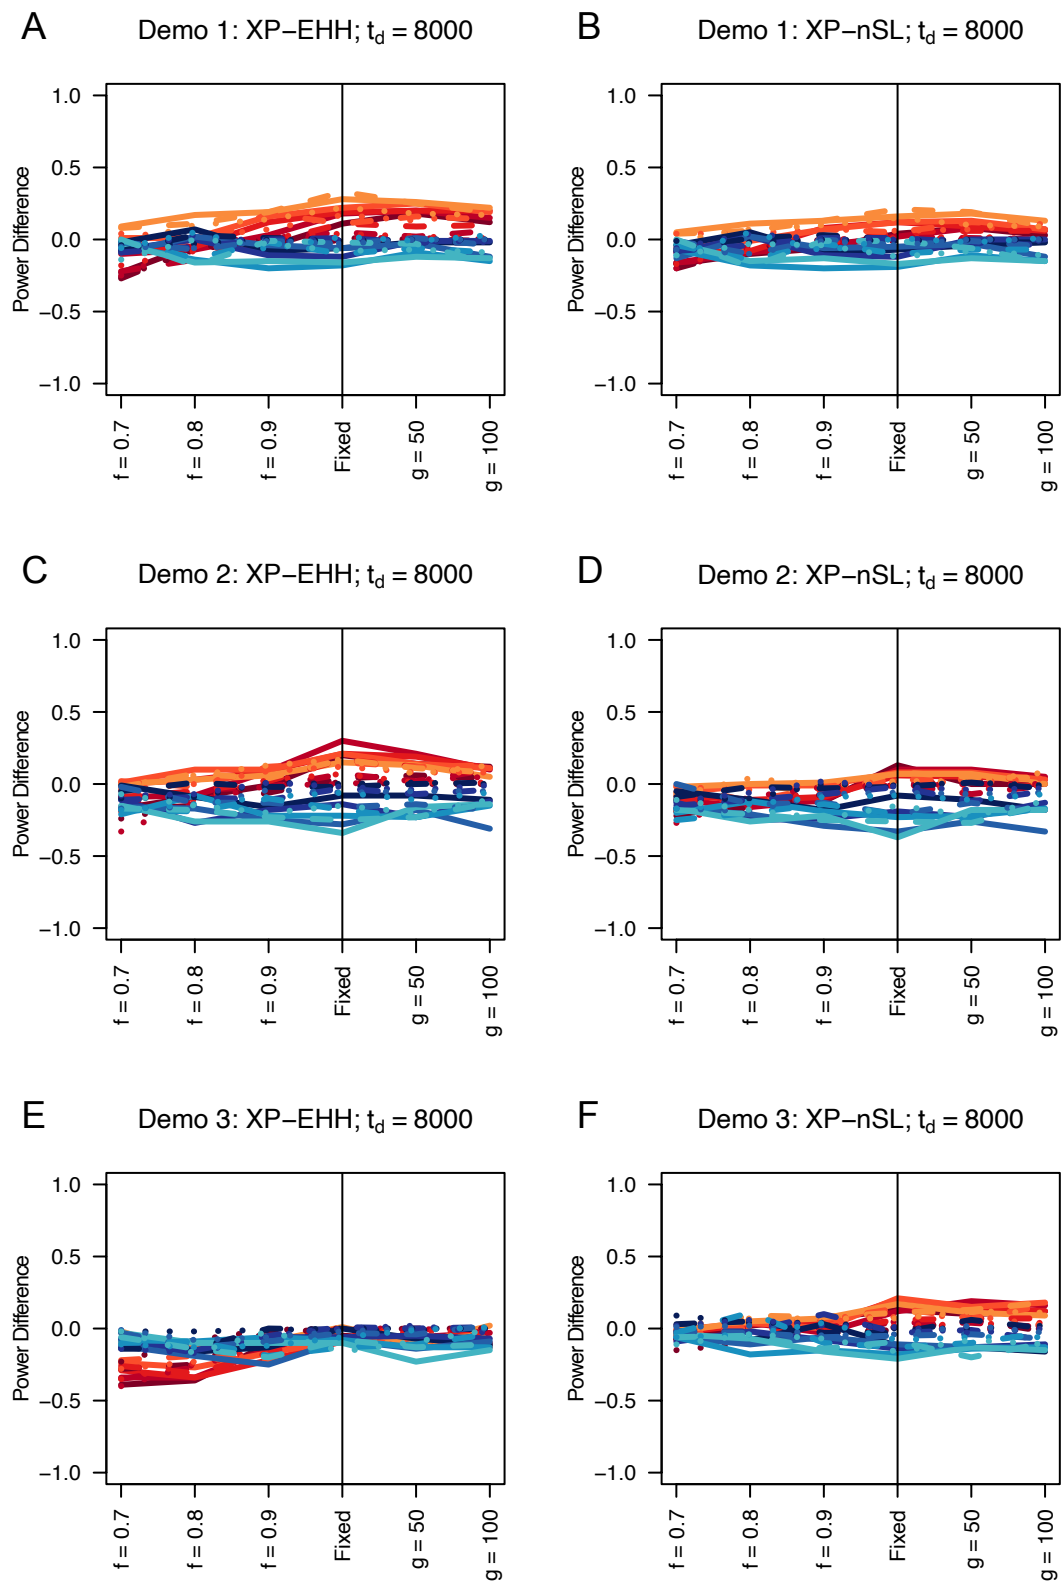

**Figure S70.** Power difference between unphased implementations of XP-EHH (A, C, and E) and XP-nSL (B, D, and F) and phased implementations. Blue curves represent the power difference between the unphased and phased statistics when applied to unphased data (UN). Red curves represent the power difference between the unphased and phased statistics when applied to perfectly phased data (PH). Values greater than 0 indicate the unphased statistic had higher power. Applied to demographic histories Demo 1 (A and B), Demo 2 (C and D), and Demo 3 (E and F) with  $n = 10$  diploid samples from each population.  $s$  is the selection coefficient,  $f$  is the frequency of the adaptive allele at time of sampling,  $g$  is the number of generations at time of sampling since fixation,  $e$  is the frequency at which selection began, and  $t_d = 8000$  is the time in generations since the two populations diverged.

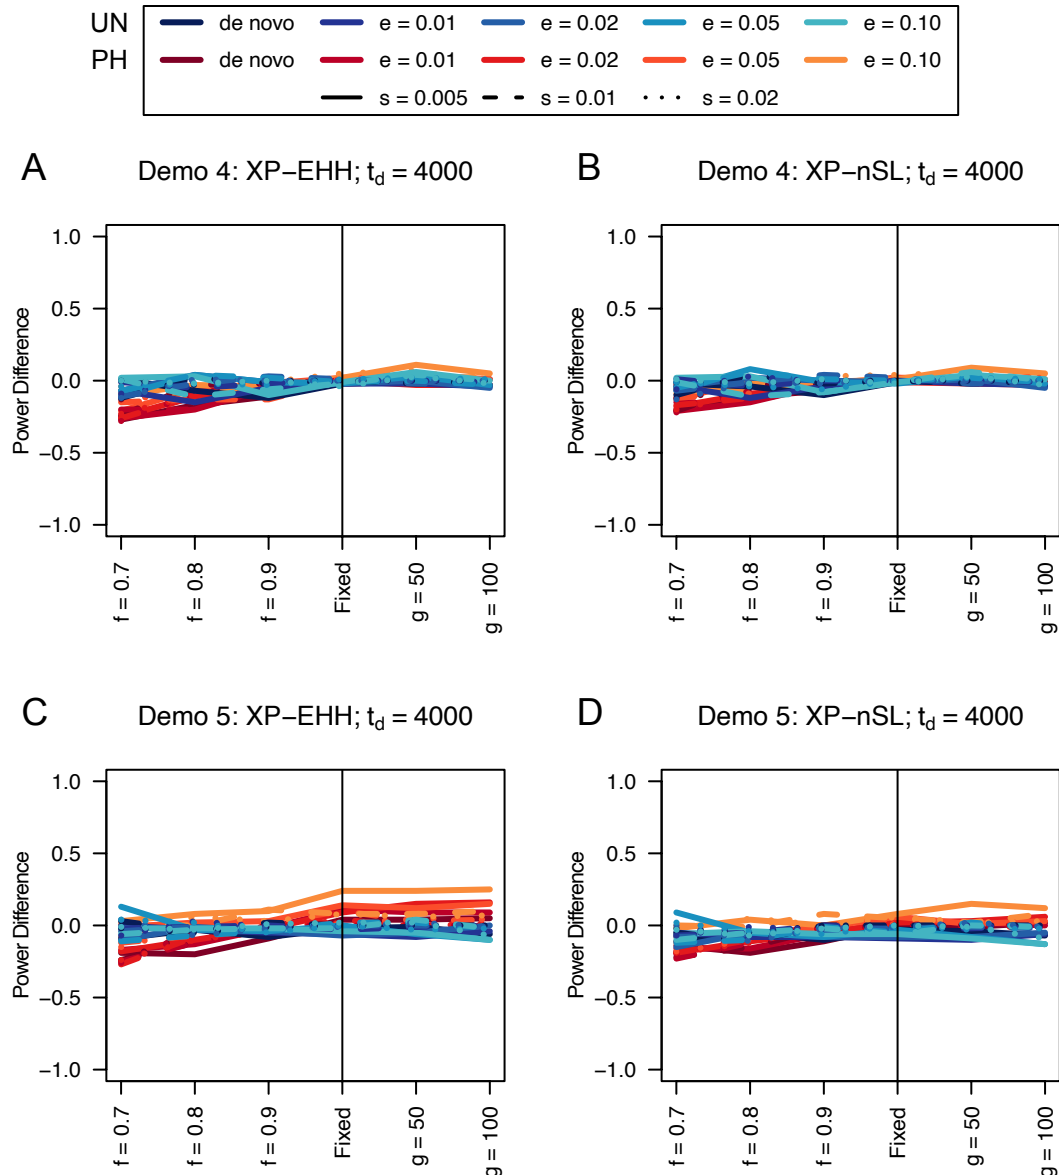

**Figure S71.** Power difference between unphased implementations of XP-EHH (A and C) and XP-nSL (B and D) and phased implementations. Blue curves represent the power difference between the unphased and phased statistics when applied to unphased data (UN). Red curves represent the power difference between the unphased and phased statistics when applied to perfectly phased data (PH). Values greater than 0 indicate the unphased statistic had higher power. Applied to demographic histories Demo 4 (A and B), and Demo 5 (C and D) with  $n = 10$  diploid samples from each population.  $s$  is the selection coefficient,  $f$  is the frequency of the adaptive allele at time of sampling,  $g$  is the number of generations at time of sampling since fixation,  $e$  is the frequency at which selection began, and  $t_d = 4000$  is the time in generations since the two populations diverged.

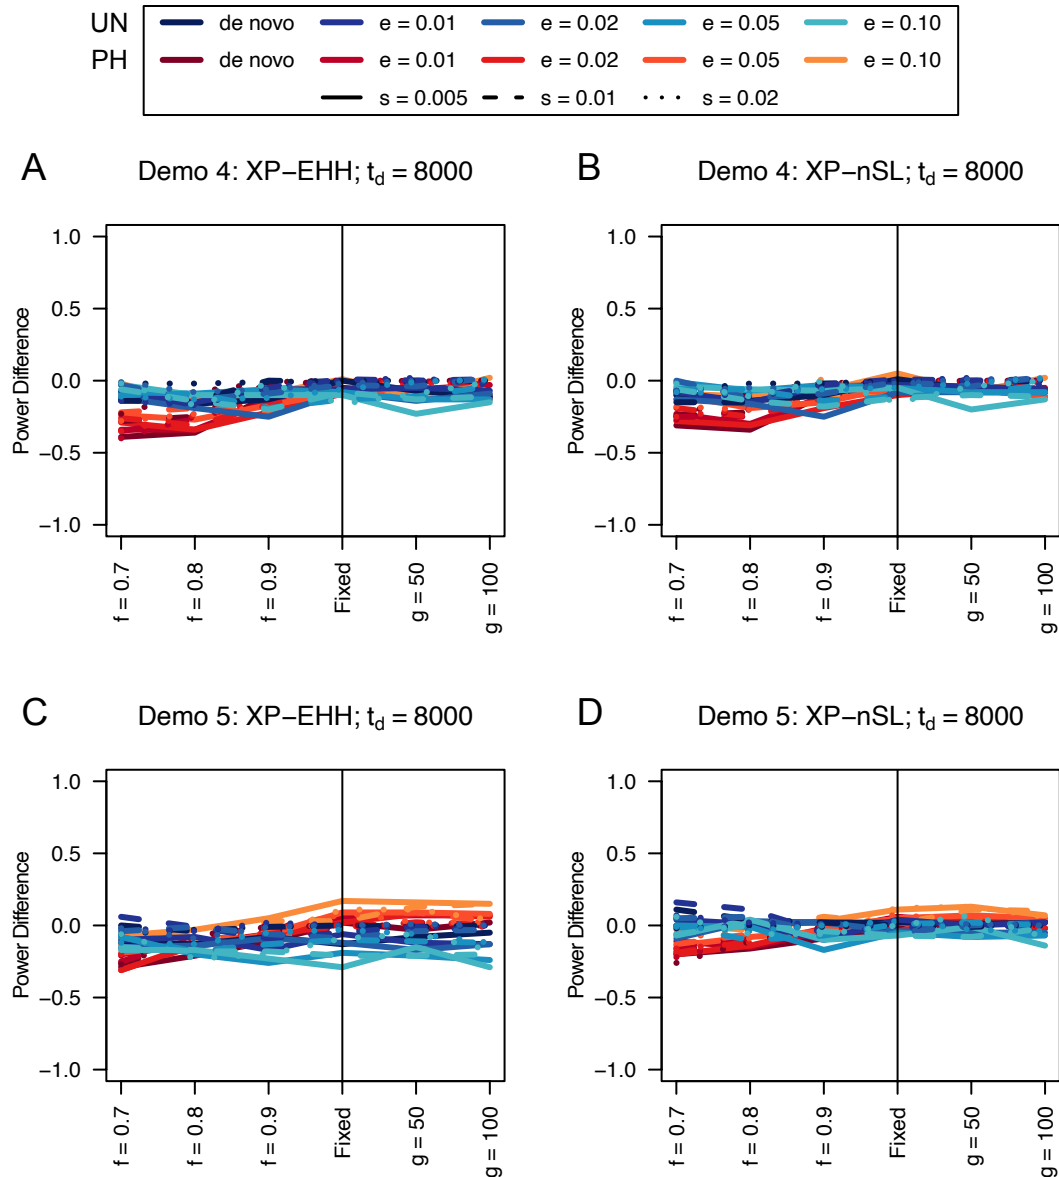

**Table S72.** Power difference between unphased implementations of XP-EHH (A and C) and XP-nSL (B and D) and phased implementations. Blue curves represent the power difference between the unphased and phased statistics when applied to unphased data (UN). Red curves represent the power difference between the unphased and phased statistics when applied to perfectly phased data (PH). Values greater than 0 indicate the unphased statistic had higher power. Applied to demographic histories Demo 4 (A and B), and Demo 5 (C and D) with  $n = 10$  diploid samples from each population.  $s$  is the selection coefficient,  $f$  is the frequency of the adaptive allele at time of sampling,  $g$  is the number of generations at time of sampling since fixation,  $e$  is the frequency at which selection began, and  $t_d = 8000$  is the time in generations since the two populations diverged.
